# Supplementary material for: A ddRAD Based Linkage Map of the Cultivated Strawberry, Fragaria xananassa
Source: PLoS One. 2015 Sep 23;10(9):e0137746. doi: 10.1371/journal.pone.0137746 (PMC4580419; doi:10.1371/journal.pone.0137746)
Supplement: S1 Table — (XLSX) [file pone.0137746.s001.xlsx]

## Sheet: Ark1
No	Tag	Locus	Linkage group	Genetic position	Fvb chromosome	Chromosome position	Segregation	X2	Df	Missing observations	Signif.	Pos.SNP	Tag Sequence
1	39903	c39903	1	0	Fvb1	1796261	ABxAB	1.7	2	2	-	158;T/C	AATTCACTTTGGTTTTGTCTTGCAGGCAACAGATGGTAAACAAACCACCAAGGTCAATAGCATAGTCTGTAGTGATTGTCAAGGAAATGGTAAGTAATCAACATGTTGTCAACTCTATGTTACGCTATGTATATTCGCTTGATGCATTAGAATCAAATTTCCGAATATGAGCATGCATGTTTTTCAACTAGTCTGCAACTTTTTACTCTTTTGATAGCATCCGCATCGGAGGATTGAGCT
2	11467	b11467	1	5.301	Fvb1	3985564	AAxAB	0.17	1	53	-	198;A/G	AATTCTGTATTACTAATATTCAACTTGGAGAGCACAACATAGTCGTTTTCTTGATTAATATAAACTAATGTAGGCTCCTTGTATAGGTGGTTGAGATATTGCTCAAGCAGTTCAGCTACATTCCTGGATTTATATTCCAGCAAGATGTATCCTACATAGATTTTCTGAATAGAGTGCACACTGAAGAGGAATTTCTCCAAACACTTGGTTTATGGGAAATTGCTCATCCATGGCTAAATC
3	38434	a38434	1	14.374	Fvb1	2926835	AAxAB	0.47	1	9	-	81;T/A	AATTCTTAGATACTTTATAACCATTGAAGAGAAACAAAAACTAGAGCATAACATCTACATATATTTTTGTGTAATTTTTTTTATAATGTTAGAGATGGAATAATGAAAGTATGCCCACCCAGTGATATGAAGAAGTAGCAAGTCTAGACTGAGCTTGAGATAGTTGCAAGTGGTGTAGCAAGAACGGTAAAGTGTTTGCAGTAACCACCTTACTTGTGCCAGTAACTAATCGCATATTTG
4	20401	b20401	1	14.425	Fvb1	4467068	AAxAB	6.63	1	43	*	40;T/G	AATTCCAAGTGGGATAACAACTTGGGAGCACCATAATATGGTGACACCAAGTGAATACAAGTCCTGCATGCCTGAAGCAATAAGCAACACACAATACAAATTCTAAGCAATCATCCAAAAATACAGTACCGCCAAGTTATTTAGTAATCACTTATCAGTACGTTATCATGCACATTCCTATTTTTGGTATATTGATCTGGTTACATCAATTAGTACCACCAAGGATACCCTTAAGTTTCT
5	18542	d18542	1	17.029	Fvb1	4716229	ABxAC	16.17	3	34	***	47;C/T_98;T/C	AATTCATAACCAACTCCAAGTTCTAATAAACTAGAAAATCCTAACTACCTTGCAACAACTTCCAAACCAAGCAAGCATTCACATTTCAAATAGCAACACATACAAAACGGTTAACAAAACCTTACCTGCAACCCAAGTATCTCAGCATCTTCAGCAAGAAACAGAGTCATATGACTAGTGAGATTAAACGGCGCCGTCAGCCACCGTCCAGGAGGCACATTGAGCTGACCACCACCCTTC
6	77	b77	1	19.711	Fvb1	5331365	AAxAB	2.02	1	2	-	50;C/G_142;A/T_144;A/C	AATTCAACTTCTGTGTTCTACAGTCTACTCCAAGGAACATGATGTAGCAGCAAAATTCTATGTCGGATTTGACGGGTTCCCTTTTTTAAGTACTAGGTTATAGATTCTGGGTTTACCATAGATCCTGCTATTCTGGTACTTGAAAAACAATAAATCTTTGATTTTCCGTACACGATAGTCAATGGTATAAATACTAGTTATCAAGACTTGTACCTCCTAGCTATCATTTTCGCCTGGTTT
7	36609	b36609	1	23.938	Fvb1	6014264	AAxAB	1.57	1	2	-	108;T/A_233;G/A	AATTCACTTCACTGAGAACAAAATCATCAATTCCATTATGATCAGAAAGTATGACTATGAGAACAAACGATGCTAGCTGGACAACCTTTAAGAATAAAATGTTAAAGCAATAATGCAAAACAAAATACTCTTAAGACAATGGTTTTTGCTCACAAATAACTTGTTTGTGAAGAAAGTATTAAGATCTCCAGATTCCACCACTTCAGAAACATTTGGATGTATTATTTACACTGATTTCTT
8	43454	b43454	1	24.526	Fvb1	6388734	AAxAB	1.8	1	3	-	113;C/T	AATTCTAAGTTCTTTTTAAAGGGTTATAGATGCTCTGCCAGTATGGTCAAGATTGTAGTTCCCACCCTTTGTAAAGTCAGTGTCAGGCGTCAGAGTGTAAATTTTTACAGAACCACAAGCTTCTAATTTTCTGATTGTGTGAATATTCCATGATTGTAAATTGTTTTCTGGAGATAAAATGTCAGGTCAGATATGAAGAGGTGGTGACCACCAAGCACTGTGGGTCTGTGGCACTGTGTC
9	11044	b11044	1	25.059	Fvb1	6437367	AAxAB	1.57	1	2	-	30;C/T	AATTCAAAAGGGATGAGGGAACATAGGGAGCTACCGTCTCTAAACTTGGTGCAGTAAGTGTATTCATTGATGCAATTCCTGTATTGGCTTGTGGTCCTTGTACATTAATCAATTTCTGGAGCATTTTCGGATCGTTCAGGATCTTAATAAGCAAATCACTATCGATCATACTTCCTTTCTCGCTGTTTTTCATCATTGCGGTTAATGCAGCTGAGGCAACAGCCGTAAAATCAGCACTTT
10	8692	b8692	1	26.522	Fvb1	7019635	AAxAB	1.18	1	2	-	13;C/A_28;T/C	AATTCAAAGCCACCACTACATACATAGCTGAAGAGACAGCTAGTACGACTAACCCTCCATTAATCTTCTTTTACACAGAAGAAAAGCATATAGGTTTAGGGTTTTTTAACTAACTATATAGTTAGTTATATAACTAACGATATTTAAAACTTAAGATAGTTCTACCAGATTTATACTGATGATCGATCAGTACTAGTTGTCACACAATCAAATCACCTTTCATCATGGCGCCAAGCTACT
11	20412	b20412	1	27.737	Fvb1	8072990	AAxAB	41.8	1	47	***	159;G/C	AATTCCATTGTGATGATAGTATCAACATTTCCATATTTTTCAGGTTCGTGTATACACACCAAAGAGATTATCACAGGAGCTGGAAGCTGCAAAAGAGGAGTATGTTCGAGCTACCTTTGGAGTGCGGAAGGACCACAAAATTCTTCTACCAAAGATTGTGGAGTCATTTGCAAAGAGTTCGGATTTGTGTCCTGGCGGTGTTTTGGAGACGATACAACGATCATTGCCTGATTCTCTGCG
12	383	b383	1	28.851	Fvb1	9630985	AAxAB	0.26	1	7	-	119;A/C	AATTCTAAGTAATTCGTCAACTTCTAATTCTAGTGACTAGCTAATTCCCCTTTCACAAGCACAACGTGTGTCATGATGATTAAGTACTGCGTGCTATATTCAAATATTGGAGGAGTTAGCTTGGTGGAATCTTGCTTTGCGCAATCTTCTTTCCTCCGATAGTAATTTTGCAAACCTGCCAAAGCTTACAAATTAGCTTTATATGCTGATTATATAACTTTGTCTACTAAGAAATGACCC
13	27730	b27730	1	30.366	Fvb1	10406053	AAxAB	0.03	1	1	-	211;T/C	AATTCAGTTCCTTGTAATATTGGGTATCCACAAACTCTTCTTGTAGCATGCTGTTAGCTCCCTCATCTGAGATTATGACCTGTGATCAAAACTCCATTAACACAGAATCTGAAAAGAAGAAAACGACGAGTCTGAGATTGGTTAATAACATGGGACTGAGACTGAAGAGTACGAAGCTTGTGAAGCTCAGGAATGTTGGGTTGGTCAACGATGGAGAGATCTGGAGTTGGGGAATCGGGT
14	37350	b37350	1	30.871	Fvb7	9350303	AAxAB	0.76	1	13	-	112;T/C	AATTCCATCCATCAGGACAACAATGCAGAAATCAAGTGAAGGGATGATATATCAGACAAAGAAATACAAAAGTTGCTAACTAATTTGCAACTAATCACCATCTAACAATCACTATCTAACTAATCACCATCTAACAATCACCATCTACTCCTACTGCCTCTCTTACTTCATTCAACTTGGCTACTCCATAGGATGAAAAAGTAGGTAATTATGAGCGAGGACCCAAACAGAAGAAGAAAA
15	9300	a9300	1	31.221	Fvb1	14967820	AAxAB	0.6	1	39	-	221;G/T	AATTCAAAAATATTCGAGATTACTGATTTTGTAGTTCACTTTTTCAGAATTTTATGCTAGGAACATCCTACTATTAGAACTTGATAACATACAATATCCTTTAACTTAATTGGAGAAATAAATTGTGCTAGCAAGCACTAGAGTTGGGGTCTAACTACACGTGCTTTTTCACCAGGGCCAAATTCATATCTGCAGAAGAATCTACTGGGATTACCTTTGATGATTTTGCTGGCCAGGAGT
16	2600	b2600	1	34.017	Fvb1	11515233	AAxAB	9.81	1	34	***	170;T/C	AATTCTGTAGTTGTCAAATTGGGGTAAAGTTCTTGTAGCAATACAATCGTTTTCCAAAACCTTACGAGATACTAGAAAGTGTGCTATACGACTGCAACACTCTTACAATTTCTCTCATAGTCTTTAGTTTGCTGGAAAGATATTAACAGGTTCTCAAATTCATTAATTTATCCTAAACAGTAAATAATGCAAGCAAAAACATAAAGAAGCTACGATCGACTTCGATTCATATTTGGTAGA
17	19402	b19402	1	34.983	Fvb1	16861533	AAxAB	0.03	1	1	-	161;A/T	AATTCCAGACCCTCAGAGGTTGATCAGGGCTTACTGCCAATCTGCTGCAACTTTGAACCTTCTGAGGTCCTTTGCCACTGGAGGGTATGCCGCTATGCAGAGGGTTACTCAATGGAATCTCGACTTTGCTGAGCACAGTGAGCAGGGAGATAGGTAGGCATAAAAGGCATAAAAGTTTTAAAGTTTCGATCTTTGCATTTGGGCGTGATTGGATCAGTCTTCTTTTCCTAAAAACTATGA
18	43481	c43481	1	36.345	Fvb7	23332498	ABxAB	1.11	2	36	-	30;C/G_123;A/G_161;G/C	AATTCTATTCAATAACCTTGTGTTATTAGACGTCTCGGTTCCTCGATAAACCATTATCATTTTCAATCAATCACTATAGGTCCCAGTAAAACCAACAAGAATCACCCTGAGTACGTACCACAAATACATGTTCCTCGTGAAGCAAAAATTGTGTGGCCGACGCAAAGCTTAAGATACAAAATTTGTTATTAATGGATGAATTGTGCTAAGAATGAAATGAACCTACAAAGAGGGGTCTAT
19	5708	b5708	1	36.583	Fvb1	17087778	AAxAB	1.83	1	5	-	235;C/G	AATTCTGTTTCTTCTAGTTTCAATCCAAGCAGTTACCAAATGCGTTCTCAAGTTACGGACGGTACAAGCTTGAGTAGTGCTCAGGCATCAGAGTTCGAAGATGTGGAATCAGGTGCTTGTTGTCCATATGTTAAATCTTTTTACAGAGTTTGTCATGAATCATGAATTGCTTTTCTGTTATAAATATTTTGGAACAATTTGTAATTTGTTGTAAAGTTGTTGATTATTTCCATCACTTGT
20	13432	a13432	1	37.683	Fvb1	18786090	AAxAB	0.18	1	8	-	139;T/C	AATTCTAAGGTTGTGAAGAAGAACACTAAGATTGTCAAGTGCACCAAGAGAAAAGTTGATGAGGTGGATGAGACTGTTAAAGATATCAAGAAGATGCAGAAAGTGATCATGAACATAATGAAGAAACAAAAAGTGGCCCTTTTGGAATGCCAAGGTAACTTTGTTGGAAAGATTTCTGAAAATTTCGTACTCTTCTGGTCAATATTGCATATCTAAACTACACCTATAGTATATAATGAA
21	20222	d20222	1	38.713	Fvb1	14968536	ABxAC	31.87	3	51	***	100;A/G_149;C/T_233;C/T	AATTCAAAAAAGGAGATTATTTTTAGGCGTCATGTGGTTGACCGAATGCCTATAGATTGTTGGAATGATGTTTGGCAGAAATTGCATCAGCAAATAGTAAATGTTGAAGTATATAATGTGGATACAGTACCTGCAGAAGTCTTTTCTACTGTCGCAACTGCAGTCATATGGTCCATGCGGCTTGCCTTGTCTATTGTATTATATCTGTGGATTGATAACATGATGCGACCAATCTATGCG
22	22791	a22791	1	39.198	Fvb7	776971	AAxAB	6.58	1	50	*	74;A/G_208;G/A	AATTCCTTATTAGGAGAGAATAAGCTAACGACAAGTCAAATTAAAATATCTATTGCACTGCAATTAGATGGATGACAAGTATTTTCAAGTACGAGATGTTACACCAGTGCATCACTCTCTATGATGAAATCCAAATTATCCAAAAGATACATTATCTATCATAGCCGCCAGATGCTCACTGTCTTTTAATATAAAACTATCTATGTAAGAGTCAAGTCACCCTTAGTAACACCCACCAAA
23	17314	c17314	1	39.224	Fvb1	20896488	AAxAB	30.87	1	54	***	123;T/A	AATTCATCATCACAGCTAAGCGGTGCACAAATATACATTCCTCAGACATACATAACGGTTTTGTTTTTATTGTTGTAACATATGAAATTGCTTACCACACTGCTCTCGTAACTGAAGAATCCATAAGTTACTGCAATAGGAAGATGATGTATTATTAGATGAAGCGGCTCTCTCTCCTGTCAATGCAAATGCACACGAGATAAATTAGAGCACTAATAAGCATATTTGTGCAATGCTTGC
24	9466	b9466	1	39.493	Fvb1	20744550	AAxAB	13.84	1	71	***	138;T/A	AATTCTTCTTAGTATTGGTGCAGCAAAATGGATGACAAAGTGATAGAGAAATGCCTCTATTTATAGGAGATCTAGAAATCACCCCTTTTTGTTGATCTTGGCCCTTCAATTGAGAAGATGAAATCTTGATCAAATGGCAGAGAAAAGAGCCTCAAACCTGCCTTATATTGTTCATAATAGGTCACCGAGAGATTCTACATGCAGTAGTTGTTGCCACCAAATCCTCACATAATCACAAAA
25	19580	b19580	1	39.619	Fvb1	13199934	AAxAB	9.67	1	58	***	192;G/A	AATTCGTAGAGAAAGGGCACTCACATTTGCAGTAGAGTTGACGCACACCATTGTTTTCGGCTTCACAGAAAACGATGCACGTTTGCATAATAAACTGGTCGGCAACCTCCCACCAAAGAAAGCTTTGGAACTGACACGACCACAAGGAACAAGATTGGTCCTTTGGGTGTGAAGAAATTGCACCGACATTGGACACGCAGCAACAGACGCCATTCTCTTCACTCTTCTCTTCTCTTCTCT
26	13418	b13418	1	40.169	NA	NA	AAxAB	1.51	1	15	-	7;G/A_70;G/A_172;G/C_231;A/T	AATTCAAGTCTGAAACACAGCAAAATGTTTGGTTTCTGCATATTTTGAAATTTTAATCATTGTGTTGCTTGTTTTTGAATCAGTATAGGTTTCTACATTGTTTGAATGATTTAGAAACACAACTCTTGTAGATTTTTTTTGGTCTGGGCATGTTTTTTCATTTAAAAAAGTGGCAGATTCGGAGGCCCAACCGTACCGCTATCAACCGAAAGTATGGTATACCAAACTGTCAGGATAGGC
27	43648	b43648	1	42.117	Fvb3	13367497	AAxAB	15.06	1	44	***	75;T/C_85;A/C_91;C/T	AATTCAAGCAGCCAAAGAGTTTGGAAATTCAATCAATCTCTAGGCTTGTTTACCAACCATAGCTTGATTGAACTTCCCAAACTCCCTAAACTCCAAGCCCCCATATTCTTTGGCCTTACATAAAAGCTCCCACTTCTTCCAATGAACCCCCCTTCCTCCTTTCTTTCCCCACCAAAACTTAGCCACCACTGCATTCAGTTCATCACAAAGGCCAAGAGGAAGCTTAAACACACTCATTGA
28	21379	b21379	1	43.2	Fvb4	11049969	ABxAB	4.89	2	13	-	123;G/A_181;T/G	AATTCACATTTACTAAGCTTCACATTTACTAATCTACCACCCTGCCTCTTGAACCTCCCTCTGAAACCAGAGCCAGAACTCGGACTGCTACCATGACCACTACCAGAAGATGATCCTGAACCAGAGGTAGATGCCACTTTCTTTGATGAACCCTGGCTATGACCTCCAGCATCACGAAGACTGCTAGCTGCCAACTCCTGTGCCTCAATATTCAGAGCAAAAGTCACGACCTGGTGAAAT
29	17041	c17041	1	0	Fvb1	2782522	ABxAB	1.84	2	26	-	16;T/A_89;C/A_231;C/A	AATTCATACAATGCAATAGCTAAACCTCTCCCTGACACAATCAATCCATATCAGAAACCTTTTGCACAATCACATTCATAACAATGCATCGAATCACACTACTACTTCAGTCGGCATAATGTACTTCATAACCTCAGCTAAATAAGCCAAAATCAGCTCAAATCACACCAAATCTTTCGATTTTCTGATACTACAGAAAGCTCAAGCCCTTTCTAACATGCAGCTAACAAACTAAGCCTA
30	28664	d28664	1	1.238	Fvb1	3596517	ABxAC	2.2	3	20	-	28;G/A_91;G/A_111;T/G	AATTCCTGAAAGTAAAAACCTACATTTGGAACCTGATGTAACATTTCACATGCTTTGAATGTTTAAGTTTTCAGAAGCCACAATTTGAAAGGAAATAATATATTGCTGGTGTGATTTTCTGCTTTTATTTGAGCAAAGGTTGTTAAACACAAATTGGTACAGAATGATCAGGCTTGTTCCTAACTGAAGAATTGTCCTCTTAAGAATCACCTTAATGGTGGAACAACATCAATGAAAACC
31	35469	b35469	1	1.395	Fvb1	2980913	AAxAB	0.01	1	44	-	147;C/T_165;A/G_179;C/T_207;G/T	AATTCTGTATTTGATTTAAAGTACAGAATCTCGATTACCTAACCCTGTTTAAATTTTCATTTTAAGTAAACATTTTGTTTGATAAGTTTGTTTTATAGGAGCTGGCTAGTAATGCTTTTGAACACGTGAAATCTCGATAATTTAATATTCGATAAATTAATAAACGTGATTAAACAATATTTTGGTCAGTCTCGATCGTCTTTATGATAACATGTTAAATTTACCTTGATTACTTGATAT
32	14988	a14988	1	3.741	Fvb1	4488166	AAxAB	8.04	1	33	***	61;G/A_107;A/G	AATTCAACTTGATTGACAAAGGAGAGCTTGCACCTCTTCAAGACCTTGTTGACTCTATTCTGCAGCCAAAGTGACAGTAGATCTTTTGATTGCAATTTTTGTCCTTTAAGACCGTAATGAGTGATACACAGGTTTTGACAGCTTCTGCTTAGCCCTTGTAATTTTGTCAAATGAGATGCCAACAAGCACCCTCTCTCTCTGTTTCTCTCTCAGTCTTCCTTGTAAGGACCAACCCCATAG
33	38734	c38734	1	10.141	Fvb1	6023946	ABxAB	0.21	2	18	-	14;A/G_20;C/T_52;G/A	AATTCATCTTACTCAGTGATCGTGTGTTTGGATCAGTTTTGTTTAACCCTTCGTATGATTAATGATAGGTGGATTCCAAGAATTTAAGCTGTTAGAGCGACTTGGGGAAGGGGTCAACAAGCCAACAGCGATCATCGGTGAGGTTGCTGATGACCTGAATCTGGATGTAGTTGTCATAAGCATGGAAGCTATTCATTCCAAGCATGTGGATGCAAATCTGCTTGCTGAGTTCATTCCATG
34	2674	b2674	1	14.247	Fvb1	6848476	AAxAB	0.97	1	20	-	109;C/T	AATTCGAATTTCTTGCTTATATATGTCAGTTTATCAGCTCATTAAAAATCCTGTTGGTGTTCTTCCTTCCCTTTCAATCAAAGTGTGCCTATTTCGAACTTAAAGGATTCTTCTTTGTGCTTCAGAATTTAGTAACAGATGAAACTTAGAACTAAAAAGATAACCCTTGAATGTGTGATACAATGCTTTGATCAATAGTCCTTGTAGAAATGGTGATACTGGGAAAGTCTTGGTAGTAAA
35	38437	b38437	1	20.926	Fvb1	9662287	AAxAB	0.25	1	1	-	117;A/C	AATTCCTTAGTACATACTATTTAACATTGGATCATCCTAGCCTAGCTCCTCGTGCAAATTGAACTCGAGCAATTCTTTGCTGATTTACACATAACACTACCTCAGGGTTTGACACCAAATCTTCCTGAAAATCTCAGAACCTCTAAAACCCACAACCCTATACAATGTCAACGGTAACCCAACTAATATATATGTCAATCTCAATTGAAGTGAGTTCACTAAATCGATGCTAATATAAAC
36	40310	b40310	1	23.986	Fvb1	10323715	AAxAB	0.69	1	1	-	48;C/T	AATTCTGGAATGGAATACAAAAAGGACTGCATAGAACTGTTTGGGTTTCTTGATTGTGTGTTGAAAACAAAAACTTTTCGAAAGGTAACATGCATATACCAACCCCATTGGCCGAAAGCTCTTCATCCTTGGTGGTAGCTAGCTAGGCATCATTTTTATTTGAACTAGCTATGATTTAATTAGGATACTTTCTCATATGGACAATTATTTCTTGATTATCTAATTTGTTTGATTCAATAG
37	2484	b2484	1	27.863	Fvb1	11454198	AAxAB	0	1	3	-	123;C/T	AATTCTGTGTGGCTATATTGTCCTCGTTGGCAAAACTTCCCTCGTTGGTAAAACTTTGTGTCTCAGTTCTTTCGCAAATCACTTCTGAAACTTTTACGACTTTATCTACAACTAAAACACAGTCCTCTAAAGCACCTTCACAAATTTGATCAGATGGCAATGATACAAGATGCTGCTCTACAACTTTCGTCTGGGTTGACTCGATGCTGAAACAAAATACATAATTGCACAGTTGAAAAT
38	30991	b30991	1	28.013	Fvb1	11496075	AAxAB	0.01	1	4	-	165;G/T_189;G/C	AATTCATTTTTGTCTAGGTACATAATAAAGCGAGTTTTGAATAGTATGGGTCAATAGTGGGAACTAAAGAGCTTTTGCACGTTGTTTGAATGTTTGGATATAAAGCGGTTCATGAATATGTTCTCCATCCCTTTTTGTTTTCCCGTTTTCCAAATGATGGATCGATCTTCATATAGGAAGTCAAATTTTCTCCACTATATGTACGAATGTTTGCGAATATATCAAAAGGAGGAACATATA
39	33420	b33420	1	29.926	Fvb1	17061017	AAxAB	0.25	1	3	-	104;T/C_208;A/G	AATTCTACGTGATATGTTTGTCTTGCTTGTTACAATGCACTACTTAAGAGATTTGAGAGTTCTATAACATATTTGCCTTGGTTGTGAATTTGCGTTCCTAATTTCTGTTGTTTATGTTCTTCATTATTTTGGTATATTCCATGTTTGGTATTCTAATCATATAAAAAATGAAATTTCACGTGTTGAAAATGAATTTACTTATTACTGTGATGTACGGTTACGATCACTACAACAATATTG
40	9595	b9595	1	29.953	Fvb1	17061081	AAxAB	0.34	1	2	-	19;G/C	AATTCCAAGTAATTAATTACTGTTTAGATAATGATTTGAAATTCCCCAGTAAAGGGGCATGAGCAATGCGATTATAACAAAACCATAGCCTCTTTCTCTTTTTCTGACTCCCTCACTCAGCATGAATCTCAAACACCAAATATGGTACATCCAAGTTCACACAACTCATATTGCAACACTACAACAATCTTGACAGATACAATGGAATACGATATTCAATCAAACAGAAAGCATATTAGA
41	29741	b29741	1	30.816	Fvb1	17083204	AAxAB	2.25	1	31	-	165;A/T	AATTCGCATGGATATTGCAGGTGCTGAATAGTTCAGAAGGGACATCAGCGTATATGGATGATGACCTCATAGACATAGAAGCGTTGTTCGAAGATGACGTTTTCATGCCTACAGCTACTTCGTAATCACATGAGGTTCACAAAGCCCTTCTGTAAAATCTGATTTATTAGTTTACTAGATATAGTGTCAAGTATCAACAAATGGTTTTGGCTTTTAAATTAAACTTCTCATGTTAATAGA
42	34724	b34724	1	31.966	Fvb1	11698812	AAxAB	0.48	1	13	-	186;C/T	AATTCCAGCATTGGCGAGCTCAAAATCATTACACGTTGTTCATCTTAGGGAATGCAATTTTAACAGTACAGTGTTGTACAGTCATGTATATATTTGTTACCAGAATGTCTAATGGAAAAGTTAGTCCAGATTTGCATTTCTCTCTGTATAATTTTTGGCTACCCAACTCTTAATCAGCTGCTCTTTCCCCTACAATCAGATACCCTCAGAATCTGATGAAAAGGATAGATGTGTTGTATA
43	28923	a28923	1	35.198	NA	NA	AAxAB	0.03	1	3	-	103;A/T	AATTCATAGCTAGATTTATTGACTATTGTTGGGATCTCTGGATTACTTGTCATCTGACCTAAACTTAGATAAACAAACTGTCCAGGCCACCAGCAGCAGGAACAGCTTCTAGCTAGTTGCGTAACTCAAACGCTTGTATTTGAATTAGAAAAGGAAATTGAGTGGGTGCAACTGTGCTTCCTTTCATAACTAATTACTTAGTGCTGCTTACGCACCTACACATGCAATATTTTCCATTGT
44	31092	a31092	1	36.056	Fvb1	15264834	AAxAB	0.25	1	44	-	17;A/G	AATTCTTAACCAAAAATATATAAATCTAATGAAAAGATTGAAAGCCTACCTTCCTGCTAAGATGCGCACTAGGCCTTGTTATTCCCACTCCCAACTGGGTGGTGCGTAGCGCGCACCATGTGAGTAGGAGACGGCTTTGGCGTCGCTTTATCTGTAAGCATTGCAAAAGCGGAGTCAAACTTCAACTGTGGGATCACGGAGTTTAACAGTAAAAGAGCGTGAGGGGTATTATTGTAATTA
45	42115	c42115	1	36.515	Fvb1	18940769	ABxAC	3.4	3	36	-	131;A/C	AATTCGTTGGAAGAAAGAAGAACCAAGGTGGGGATGATGATGTGCCATAAGTCTCCCCAAAAGTTTTCCCTCTTCTTTCCAACTTCAAATGCTGTGGAGCTGCTTCTGTATGTGTACCAGTTAATGTATGTAATCTTTTCATTTTATACATAGGAGGTTGTTTAACTTGTTATAAATGTGTATATAAACAGCTTCAGTTGCTTTATGCTTTAAACTTGATTCTCAGTTCATCTTCATAAG
46	8367	a8367	1	36.973	Fvb1	15187022	AAxAB	1.26	1	31	-	31;A/T_88;T/C	AATTCATATGTTTCCATGTCAATCTGGTTTGAGATGAAATGAAGTTGATTCTTTTTAACCCAAAAAAGATTGTTCAAACTTACTAAACTAGTTTTAAAGAGAACAGTGTACAGATTTCCAAATAACGAATGAAGATATAATAACAATTTACATCTGTTAACATTAAAGTTGATATGGCCGAGTTGGTCTAAGGCGCCAGATTAAGGTTCTGGTCCGAAAGGGCGTGGGTTCAAATCCCAC
47	39821	d39821	1	37.16	Fvb1	17992201	ABxAB	2.77	2	40	-	41;C/T_70;G/A_229;A/T	AATTCATTTGAAATAAACAGCTACTTGTTTTGTTTTTCATGCCAGGTTTATGCTCCAGTTTCAAGTAAAAGCTTGGAAGTTGAAGAGCGTGTTATTTTTGTCTTTGGTTGTCTGATGGCAAAGTGTGGGAGCACTCCTCTTAGGTCTTTTCAAGAATCTCTTTAATATTGTAAAACTGTTATATCTAGTGTCTATGCTGGTAGCCTGGTACAACTGTTTTTAACTTTATACTTGTAATCA
48	7348	b7348	1	37.654	Fvb1	18708843	ABxAB	1.08	2	23	-	9;C/A	AATTCCAGAATGAGATGAAAGTTATTGGCAAAACCCATCACCGCAGTTTAGTACGTTTGCTTGGGTATTGCCTTGATGGACCAAAGAAGCTTCTGGTTTATGAGTACATGAGCAATGGATCACTTGCAGATATACTTTTCACATCTGAGAAGAAACTTTATTGGGAAGAAAGAATGGGAATTGCTCGAAACATTGCACGAGGCTTTCTTTATCTGCATGAAGAATGTGATACACAGATCA
49	4691	a4691	1	37.87	Fvb1	19214680	AAxAB	0.01	1	4	-	32;A/T	AATTCATTTACTTGTAGCTTCCTTTTGTTGATAAAAATTATCGTTTTCAAATTTTAACTTTTATCACTTCACATGCTGCATATCTTCCGCCTATTTAGGCTATGATTCACTTTGTGCCTGTAAATTTCTATTTGGTTGTATGCTGTATAGATAGCATATAACAAACTTTAACCCAAAGAAATTTAAATAGCAATAACTGGTGCAATTTAATTCATCAGACAGGCCTGTTTGTAAGTTTCT
50	32329	c32329	1	38.549	Fvb1	14797442	AAxAB	0.01	1	10	-	175;T/A	AATTCTGGGCTTTGGTGGGTATTAAAGGGTCTGCAATGATCTGTGCTAAGTAGTTTCTTTTGATTTGGGTGGAGGGAGTGTTAGGTAGTGGTTTTTGATGTGGAATATTGATATCAAGTACAAGACATGCTGATTGCTGATGAGGGTGAGAAGGATTTGTTCTTCGATTCCGCAGTGTACTTGTCATCTGAAGAGTCAGTGGTAGCAAAAGAGAACCTGGAGTGTAGCAAGTTGGAGTAT
51	11664	a11664	1	40.196	NA	NA	AAxAB	5.58	1	66	*	67;A/G_122;T/C_216;C/A	AATTCTCTACCACTATGAAAGAAAGAAAACATAGGTAAACCCATGCTTAAATATGCATACTCTGTAAACATATATAGTCATATGAGTAAGATGGTGAAACAAATAGTTACTTTGAAGAGATTTAGATATGCAATGTATAATGCAAAGTCTGCAATCTGATTCAATATGCAGTTTGTGATCATGAATTAGCTTTCCTGAAAGTGTTAAGACATTTAGCACTAAAGTAGAGAGTTGTGCAAA
52	37263	c37263	1	40.686	NA	NA	ABxAB	4.96	2	7	-	153;C/T	AATTCATAAAGATGTCAAATCATTTGTAGAAGCTTGTCATACATGTCAACAAAACCATTATGAAACTATACACCCTCCTGGTTTGTTGCAGCCTAATACAATTCCTGATGGAGAGCTTGGAGAGATATTTCTATGGATTTTGTGGAAGGGTTGCTAACTTCAGATGGAAAGTCTGTGATTATGGTTGTCATTGATAGGTTTACAAAGTATTCCCATTTTATACCCTTGTCTCATCCTTAT
53	10666	d10666	1	41.351	Fvb1	20477424	ABxAC	6.7	3	18	-	153;A/G_179;G/C	AATTCTATTAAAGCCATCTAAAAACTTAAGTTTGGATCTTATTTCATAAACATACAAACACACATGCATATATTCAAGAACACTTTAATACATTCTGCATACTTAAGTTATCCCAGATGAACTAGGAACATACCTTGGTTGGATCTCCAATCTGCCTTGACTGCTATATTCGATGATGAGACCATTGTGATAGACTTCTGCGTTGGCTGCGCACATAAACAAGAGATGGATGCAGGTCTT
54	29357	d29357	1	41.647	Fvb7	14898686	ABxAC	10.98	3	26	*	70;T/C_107;A/G	AATTCCAAATTACAAATCGAAATTTGGGTGAAAATGAAAGCATTTTGAGATAAGGAGTATTAGATGGTTTTCAGAATCCTATTAAAGCCATCTAAAAACAGACAAACACACATGCATATATTCAAGAACACTTTAATACATTCTGCAGACTTAAGTTATCCTAGATGAACCAGAAACATACCTTCATTATATCTCTAATCTGCTTTGACAGCAACCTTGTTTGACGACACCATCTCGACC
55	37812	d37812	1	42.365	Fvb6	29884422	AAxAB	0.06	1	2	-	107;G/C_235;C/A	AATTCGGTAAATACTTCTTGACACTATCTAATGGTACTTTTGTGTGTAAATTTATTAGCCTTTATTACATGGTGGTCCAGAATGATCATAGTACACATCTAATACACGATTTAGAGACTTCCTATGAAACGAAACACATATATACTGTATACACTGACTGTGAGACTGCAGTTGAAGCAAGTCTGCTCTGATTCATACTAAATAATGAAATCATCTCTCATAAGGAAAAGCTTGACCATA
56	22497	a22497	1	43.726	NA	NA	ABxAC	7.11	3	40	-	21;T/C	AATTCAAATATATCTCATCTTTTTCATGATAACCTTCAAGGTGAATGCCTTTCATTTTCTTTGTTCTCTGCAAAACAAAACACATATAATTATTCAGAGAAACTGATAAGATACTTGCTGTAAGTATTATCTAATTAATTAAAGCGCGCTCGACAACAATGTAATTCAAGAAGCACACTCGATAATTACTTGATCAGATACTTACTGCATTATCTGATAAAGCACTCTTGACATCATCGT
57	8040	c8040	1	51.871	Fvb4	26121968	ABxAB	66.38	2	1	***	87;A/G_147;G/A	AATTCTGTATAGTTGTTTGGAACCATGATCTGTAGGTAACAAACAGTCAAAACAGACGAACATGTTAGAAAAGATCCGCATAACAACAATAATCAAGCTAGCTAATTTCTTTATAAAGTGCAGATAGAAGGAAGTTTAACCAATTAAGTTGCTGACGGAGATGGACAATAATTACCATGTCAATTCCAGCATTGATCCCTGCTGTAATCGAGTATGAGTAGTTGGCATGAGGTGGTGAGG
58	20002	d20002	1	0	Fvb1	126302	ABxAC	0.61	3	8	-	46;T/C_206;G/C	AATTCCCAACAATCTCTTTCACTCTATCTAAATTCCCTGCTCGAGCCGCCAAGTGGAGTTGGGAGTCACCTCTTTTACCAGGGGACTCCTTGCTCTTCCTCCTTTCACTACTGCCGCCCCCAATGAAGCTCAGCTGCTTCTCCATTACTATTCGAAAACTCTTCTGCTTCTCCATAAGTCCGCGAAAACTCTTCTGTTTCTCCATTGCCCCACGAAAACTAGGCTGTTTCTCGATTGCCC
59	36965	d36965	1	0.691	Fvb1	81441	ABxAC	0.96	3	7	-	139;G/A_230;T/G	AATTCTTTCATTTTCTTTTGGTCTGAAGAGAGTAATGATCGTTAACAATTTTAAAACACAAAATGTATATAAACAGAAAAACAAGTAAAGAATCAAAAAGACAGAACCTTTTATAGCGATTATGGACAAGAATGACCAAGGGGCTAATGTCCTTGAAAACGGTATCTTCCCATTCTGAAGTCGTTACATCTTTGATGGGACGAATGTAATTATCATCTTGCCATACAATTTCGTCGTCAC
60	21631	a21631	1	3.984	NA	NA	AAxAB	9.48	1	37	***	178;A/C	AATTCCATTCAGTGACCTTCAGCAAAAAAATATTAAACGAAAAACAAAAGTAATTGGGTTTTTAACGATTCTCTTAGGATGTAAAAGCTAGTTTTAATAATGGATATTAATAATTAATGATGTATTATAATTATGTCGTATACAGCCGACATAAATTCTGACACCGAGGGGAACATGGACATTTTAAAGAGCGAAAATACCATTTTACCTGTACATAAAGTCCAACTTAAAAGTATCAAT
61	10691	b10691	1	10.575	Fvb1	2296782	AAxAB	11.45	1	38	***	133;T/C	AATTCTAACCAAGAAAAAAAAAACTCAGATTCAAACTAAACCGCACTGAGCTTACCGAATCAAAACTGATCAATCCAAACGAAACGTAAACCTCGAAGCTGCGATTCAACCGAAATCAAAATTCACAGAAACGTATACGAACCTCAATACCTTATCTACGTTGCGATCATCCAATGGATCTGAAACAAGAGCGGTGAACAATCGGAAGCCTCGTGAGAAATTTGAAGTCGGTGAGTCTCG
62	7471	d7471	1	13.885	Fvb1	2904167	AAxAB	5.33	1	37	*	117;T/C_124;G/A	AATTCTCAAGGATTCTGAGTTTTGTAAAACAATACATATAAGATCAGTCGTGTATGTTAATACACTACTAGAAAAAAGGACTTAAGCCACGAAAAAGCTCGAGAGGATTAAAGAGTTTTTACATGAGGAGTTGGCTCCAAGACTCTGGAAGCTCCTGGTTCTGGTTGTTGGTGTCATGCCAGGAAGGAATAAAGGGAACTGAAGAAGAGGAGGGATGAGTTGGTTGAAACTGTGGAATTA
63	7099	a7099	1	13.889	Fvb1	2926835	ABxAC	0.84	3	8	-	218;A/G	AATTCTTAGATACTTTATAACCATTGAAGAGAAACAAAAACTAGAGCATAACATCTACATATATTTTTGTGTAATTTTTTTTAATAATGTTAGAGATGGAATAATGAAAGTATGCCCACCCAGTGATATGAAGAAGTAGCAAATCTAGACTGAGCTTGAGATAGTTGCAAGTGGTGTAGCAAGAACGGTAAAGTGTTTGCAGTAACCACCTTACTTGTACCAGTAATTAATCGCATATTT
64	29861	d29861	1	16.646	NA	NA	ABxAC	1.12	3	9	-	21;G/C_176;G/A_198;T/A_225;A/G	AATTCCGTACATGAAATATGAGCAGGTTCATGTTGATCCACAAATCTTTGAAGTTGGCATACTAGAGGATGCGGCTCAGGACTCTTCAATAACAAAAATTTATGATTGAGAAGTTCTGTTTATTTATGAACGTCTCAAGAATTTTTAATAATTGGGATAATTGTCAATTGCAATCTGGCGGATTTTATTAGAAACACTTATTCGGAGACAGAATGCACTACATATAGCTATACTGCATTG
65	36386	d36386	1	28.93	Fvb1	7128309	ABxAC	4.27	3	60	-	136;G/A_148;A/T_183;C/A	AATTCTCAATCAATCATCCACCAACAATGAAATTGTAGCATTATTCTAAGATAGAGACTTCCAAATTGAAGCATACTAGTTAAGTAACCAAGTAGGAGAGTGCGATCAATCATTCAAATATTTCCGCTCCATATAAGTGACAAGCTATAACAGTCTAACACCATACACAAACCTAGCTCAACTCGTTCCTAGTTTATAAACTCTATGTGAGGGAGCTAGTACTCGGATTGTGAGTGCTAC
66	27657	a27657	1	36.677	Fvb1	18386297	AAxAB	3.41	1	3	-	218;A/T	AATTCCAGATATTCCTCAAAACTCAAAAACAAAGGTCCAAAGCACAACATAGAGAGTAAAGGCCTCAACAGGAGAAGCTGCAAATGCAAAAAGGTTGGATGAAAATAAGGTCAGACGGGGAGAACTGTGGGAGATCCCCCAGGCCACAGAGTGGACATGGATGAAATTGTGTTCTTTATATAACTTTCCTTACCATTCATATTTCTTGTCAGAACATTATAACGTATTATTAAAATATTT
67	43744	b43744	1	42.836	Fvb1	16102720	AAxAB	6.72	1	2	**	104;G/C	AATTCGTGTGTGTTTAAATATACTGGCAGGCATACTGGTGTCTTACCACTTTACAGGCTGTGGTAACTCAATAATCAAAGGCTTTTTTATCTGGATAATTTTGGGTGATAGAGTTAAGGACATTTGGGTACTTTATTAGTACTAACTCGATCTGATTAATAAGATTCTTATGATTACTACTGGTATAGTAAGTTTACAATCAAGCTAATTGGACGTACTCTAGTATGATGAACAACGTAA
68	8303	b8303	1	43.536	Fvb1	16380481	AAxAB	7.51	1	0	**	15;G/A	AATTCATTAACTGCAGACATAGAATCAGCCATAAGTTAGCATACATGTCTAATGTTCAACCAAAGATTTGTAACAGAATATGAACAGAAGCTGCGAATCAGACTAACCATTAAAATTCTACTTATTAAAGGAAAACCTAAAGAACATAGCATTTTGTTTTTCCACAGCCAGATAACAAGAAGTCGAGGATTCTAGTAATTCATACATAAATGCTGCAATTTCAAAAGTCAACGGAAACCA
69	40737	b40737	1	44.419	NA	NA	AAxAB	5.37	1	19	*	69;G/A	AATTCACAAAGATTGTAACCCGCATTCGCATTGATTAAATTAAATTATTCTTTGTACACGTGTTGTTTTATTATTTGTTGCAGATATTTTCGTGTTTACAAAATTGGCAAGCCCAGTGGGACAACTTTGCCTCTCATCTCCTTCTCCGCAAGCAAGTTCAAATTCATTCGACATAATGGCCTCCAAGAGCACTCAAGCCATCTCGACGAAGAAGTCTAAACCAACGACCGCGAGGTCAAA
70	10310	b10310	1	47.617	Fvb1	13199932	AAxAB	5.04	1	11	*	7;A/C	AATTCGTCGAGTAAGGGCACTCACATTTGCGGTAGAGTTGACGCACACCATTGTTTTCGGCTTCACAGAAAACGAGGCACGTTTGCATAATAAACTAGTCGGCAACCTCCAACCAAAGAAAGCTTTGGAACTGACACGACCGCAGGGAACAAGATTGGTCCTTTGGGTCTGAAGAAATTGCACCGACATTGAACGCGCAGCAACAGACGCCATTCTCTTCACTCTTCTCTTCTCTTCTCT
71	22629	a22629	1	49.632	Fvb1	21401268	AAxAB	0.23	1	36	-	21;T/C_238;A/G	AATTCGAAGCTTCAGAGTATCTACTATAAAATCTTCGGTTCTTGTAGAAATTTGCATCAAACAAGTCAATCCTTGGAAGGATCGATATTGGTTGTGCTCCAAATCAACCTAGTAAAAGAAATATAGAAGTTAAACAACATCATAAACAGTGACTTTGAGAGTTTTTTCAAGCACCACAACTTTGTTAATAACTTTGACACAACTGATAAAACTGACAGTGTAGAAACTGAGTATCAATAA
72	27322	d27322	1	50.533	Fvb1	14079467	ABxAC	3.58	3	13	-	36;G/A_67;A/T	AATTCATGTGGAGCTTTCTTAAACTGCTTTGCCTGTGTCTGATCTGTTTGGTAAGGATAATCACTACTCTTGTCATTTTGGACCCCAACTGGCACACTTGAGGCTCTTGATATGTTGGGTTTATTTGGGTTTTTCCTGTTATACTTCCCTTTACATTTAGGATCACCACCACCCCTTCCACCATTAGAAGGCTTCTGATTTCCTGAGTTAAGTGTCGGTTGGTTGTTTATCTGATGATCT
73	32801	a32801	1	53.861	Fvb1	23060693	AAxAB	0.03	1	1	-	90;T/C	AATTCATTGAGATATCTGTTCCTAGTTCAATATCTCCATTTCTAGGAGGTTGACCCCGAGGGATCTCAAAAGAATCCTGCAAGTAGTTAGTAAGTCAAACATACAATGAGAAAACTCTAAGTTTAAAAATAAAATAAAAAAACATCAACTTAAAATATGAAATTCCTATTACCTAAACCCTTTCTCAGAACTCTATGAAAATATACACACAAACAGAAGCAGAACCAAAAAGGTCCAATA
74	24160	a24160	1	0	Fvb1	2171247	AAxAB	5.63	1	25	*	208;G/T	AATTCCCAAATAGCCTATATCGTATATTTCTTTTCACAAACCTATGGACAACTCCTTTTATGTAAAGCCTTAGCTAGCCCCATTCGATTAAGGACCACTGTTCTTTCCACACATAATTTCCCTCCAACGTTTAACTTTTCTCAAATACAGACACTCACGTTAAAGTTCATATCCCTTTTCCTCCTCCCTAGCTTGTAACAAGAAGCTAGACGGGAAAATAATACAGAACCTCTTGTAATT
75	16503	a16503	1	1.793	Fvb1	2096561	AAxAB	0.01	1	0	-	40;A/G	AATTCCTGAAGCCACCATCTTTGTCCATCAGATATGCAAAACCACCAATTGCGGCAATTACCTGGAAAGTAAAGAAGAATGCTTATCGTAAGAATCTTGACAGTATATGGAAGTAATAGATTGATACAATCCAGTATAAACCATTTCATGTAACATAATGCAAAAGACTATCACTTACTGTTTGTACAGCCACAAATACAAGTATAACATCCCTTGCCACAAAAATTCTGAACTTCATTT
76	14300	a14300	1	3.191	Fvb1	2988852	AAxAB	0.17	1	49	-	72;T/C_171;G/T	AATTCTATACACAATTAAGCATAGGTTGGATGGACGTAGAGATCGCAATTGCAGCAATCAAAACTACGTGCATCGATCATAGTTTAAGAGAAAACTGTATATATGATAACAAAAATTGCATATATGCATAAGACATAATATATAATTAATCAAAATATTCCTCTTTGTAAAGTGTTAAATGATAAAGTATAAATGAGGCCTCGTTGCCTTAATTAGAGCTAGTTTTTCATGTATCCACGG
77	42410	a42410	1	4.343	Fvb1	4213778	AAxAB	0.15	1	39	-	121;T/C	AATTCAGATTCAGAAAGCAAACTAAGGCTGCAATTCTTCTCCAGGTCCTATTTCATTCATCTTCTGATTGGGTTCTCTTAAAAATCTAGAAAAGAAGGTCTAAGAACTTTTATTAATGTTGTTAATTTAGTTTGCATGATGACTGCAAGAACAATTATGCTTCTTTTCATGTATTGTTCAAGAGAAATAATAGTATTTGGTCATTTTGTTGGTTGCTTGCAGGCTCATTTGCGTTGTCAC
78	42132	a42132	1	8.531	Fvb1	6560461	AAxAB	7.19	1	28	**	195;A/T	AATTCGTGAGAACATACTTGACGTCGAAGATAAGATGAATTATGTTTAACAATTCCTAGATTATGTGATCTGATTTGATGTTTACCCACTTAATTGTTTCTCGAGCACGTATAATACTGAAGGACCCTAGCTAATACTAAGAGTGGTAATCCATTGTTAATGTGAATCACATTCGGATTGTAATAAATATAACAAAATTTCTGGTATAATCAATCACGCTCGGATTATAAATACAACTAT
79	31664	c31664	1	10.615	Fvb1	6388734	ABxAB	7.29	2	33	*	211;A/C	AATTCTAAGTTCTTTTTCCAGGGTTTATAGATGCTCTGCCAGTATGGTCAAGATTGTAGTTCCCACCCTTTGTAAAGTCAGTGTCAGGCATCAAAGTGTAAATTTTTACAGAACTACAAGCTTCCAATTTTCTGATTGTATGAATATTCCATGATTGTAAATTATTTTCTGGAGATAAAATGTCAGGTCAGATATGAAGAGGTGGTGACCAACGAGCACTGTGGGTCTGTGGCACTGTGT
80	4690	d4690	1	11.534	Fvb1	7689924	AAxAB	3.12	1	17	-	92;T/C_106;C/T	AATTCTATTGTTTAGATTTCATGATGTAGAATTTTTAAAATTGACAAATGACGCTGCCTATTATTCAAGTAGAGAATTTAAGCTCTCAAATTCTACGATTATTTTTCTGTAAAAATTGCAAATTCCACAGGATAATAATCCAAACGGTGAAAAGGGTTAAAAAAATTATAAATTCTTTATTTTTATTAAATTCCCAAAAATTCACCCCATCAAAACAAACACTAGGTTTTACTACTCTCA
81	42804	b42804	1	12.084	Fvb1	6437367	ABxAC	3.68	3	16	-	13;C/T	AATTCGAAAGGGACGAGGGAACATAGGGAGTTACCGTCTTTGAACTTGGTGCAGTAAGTGTATTCATTGATGCAATTCCTGTATTGGCTTCTGGTCCTTGTACATTAATCAATTTCTGGAGCATTTTCGGATCGTTCAGAATCTTAATAAGCAAATCAGTATCGATCATACTTTCTTTCTCGCTGTTTTTCATCATTGTGGTTAACGCAGCTGAGGCAACAGCCGTAAAATCAGCACTTT
82	39016	a39016	1	12.585	Fvb1	7162065	ABxAC	4.53	3	42	-	44;A/T_177;T/C	AATTCCAGAGACAAGAGCTTTCCCAATCAATAAGTAAACTCTACATGTCAAATGTCTCATATCTTCTAAACATCAAACCTTGACTCAATGCCAGCTATCCACTGACCTAGTAATGCTACATACCTTGTATCAAGTCGAGCATGGCAAGCTCGTTTTCAGAACTATCGAAAACAAAGATGAAGTACAAAGTTGCAAAATGCTTGTATACAAGCCGAGTATCCTGCACCAGAACGAATAAAA
83	41728	d41728	1	12.733	Fvb1	7798097	AAxAB	0.6	1	39	-	62;G/C_156;T/C	AATTCTAATTCAGATTTCCTTTCATAGAATTTCTAGTACCAGAACTTACAGATGGATGTGCAGCATTCTAAACTCTAATTAAAGCCAAAATGGTCCGAAGCCAAAGAGATAATAGATAGGAGAGATAATTATTTAACTAAGAGCTTGGTTTAATTTTCAACAAGCTAGGCCTGGGACGTTCATATTCCAAATACATTTCAGTAATTTCCCTAGGATATAATCAATGGCAACGGCTTCGTA
84	5305	a5305	1	13.308	Fvb1	8213260	AAxAB	3.42	1	16	-	126;C/G	AATTCTGATTTATTGCAGGAAAAAAAAACAGAATTTCAATTTGGAAAAACCTAGAAATGTGAAGTTGCAATGTACCATACCATGAAAAGAGCGCTTTCTCCCACAAGAGAATAATGAGCTGCACCCCCTAAACTGTATTTATTCTCTTTACCCTCAACTGTAAAATACATATGTTGATGGACATCCTGAATTGCCACTATTGCACCTGTAAAGACAATATTATTTGTTAGCTCAAATCCT
85	36153	d36153	1	13.701	Fvb1	8066389	ABxAC	4.95	3	20	-	20;A/T_222;A/T	AATTCCAAAAGAAGAAATTGTTTTCAATTAAGAGTAGGAGAATCTCTTATTAATCAAAACAAAACTGACAGACATGCTTCATAAAAATTTGGAATTTATAAGTTGCATTAATGTTATTCTTTAACTCATGGACCACAGAGGTCCATGCTACTGAGATTTCTCTGAGAAAGTTGTTAGTTTTCCAAGAATCCAAACACAAAATTAGGTTAGACAACCCGATGTAGTGGATTTTAAATCAAT
86	19557	b19557	1	17.812	Fvb4	27844676	AAxAB	0.07	1	8	-	26;G/A	AATTCTAACAAAACATAGTAGACAAAACAATTTCAGACCAAAAACAAAAAACAAAATAGTAGACAAAGCAATGAATGCAATGTCTTGACTTATTACACCATGCATATGAGAAAGCAATAAACATGCAGAAAACTTATTCAACCAAAATGGTCTAACTATATGTATAGTATGCAATAGCTAATAGGTAGAAGAAGTAAAACGTGATTGCCATCTAGATGGCCTCCACAAGAACAGTGGCAT
87	7098	b7098	1	19.816	Fvb1	10027298	AAxAB	1.9	1	56	-	152;A/G	AATTCTGAACCTTGTGCTTTGGTTTCCATGGAGAACATCCGCTTCATCTCCACAACTTATGTTCAACCCAAAAACCAAATTGATCACCAGTTTACTAAACTAGAATTAACTCCCTGTGATGTTCAATTACTGCTTGTGGACACAATCCAAAAAGGCCTCCTCTTCCACAAACCCGACAAGCAGAGCTTGAAGCTCATTGAGCACCTGAAAGTCTCCTTCTCACGCACATTGGACATCTTC
88	17099	a17099	1	32.848	Fvb1	19214680	AAxAB	0.06	1	4	-	16;G/A_107;C/G_141;A/G	AATTCATTTACTTGTAGCTTCCTTTTGTTGATTACAATTATTGTGGTCAAATTTTAACTTTTAGCACTTCACATGCTGCATATCTTCCGCCTATTTAGGCTATGATTCACTTTGTGCCTGTAAATTTCTATTTGGTTGTATACTATGTAGATAGCATATAACAAATTTTAACCCAAAGAAATTTAAATCGCAATAACTGGTGCAATTTAATTCATCAGACAGGCCTGTTTGTAAGTTTCT
89	3956	a3956	1	33.446	Fvb1	14679252	AAxAB	0.34	1	0	-	77;A/G	AATTCTTGTCTTCATGTTTGTTCGATCAAACCATCAGTTCAGTATTTTGGTCTGAACTTCTGGATTCATAAATATATAGTGAAATTATAGCAAGTATTTGATGCTATGAGAAAACGTTAATCATAGTTTTTGTATAGCTACAGATGACCAGGTTTAGAGGAAAAGAATATGCACTTAAGCCCTAAGCCCTATTTTAAGTAAGTGTCAGTTTGCGTTAAAATGCTTCAAGTAAACGTCTTA
90	30489	a30489	1	33.794	Fvb1	14751963	AAxAB	0.25	1	3	-	226;G/A	AATTCGATTCCCATGACTAGGTAGAGAATTGTTCATCTGAGTTCATGGAGTTGGATTGACAGTGAGCATAAATATTTTTCCTAGCCTCCTGGTCTTGGTTAGAACACAGTATATCATTGTTATTGTGGCGCCGCTTTCTTATAGCAATTGATGAAACAGGTTTAACAAATGAAATCAAGAAAGTATTGAAGAAATTTATGTACGTGTGATCTTGTCTAGGGGTATCGTCTGGAACGGAAA
91	38895	a38895	1	35.073	Fvb1	16380481	AAxAB	0.25	1	46	-	178;C/T	AATTCATTAACTGCGAACATAGAATCAGCCATAACTTAGGATACATGTCTAATGTTCAACAAAAGATTTGTAACAGAATATGAACAGAAGAAGCTGTGAATCAGACTATCCATCACAATTCGACTTATTAAAGGAAAACCTAAAGAACATAACACTTTGTTTTTCCACAGACAGATAACAATAAGTCGAGGATTCTAGTAATTCATACATAAATGCTGCAATTTCAAAACTCAACAGAAA
92	37175	a37175	1	35.168	Fvb1	16277453	AAxAB	0.25	1	1	-	28;G/A_140;C/T	AATTCTCTAACAATGCAAGAACATCAAAGTCCTCGATACAAATATTTTGATTTTGGCACTATAAGAAACCCCAAGTTTTTGCATGTTTCTAAAACCACAATAAATTTCTTAAGATTTGAATGACACTATATATCTTGTAACTATAGAACATACCAATAAAATAAAGTAAGGACACAAAGGAAATGAAAGATCTTACGAATTTGAAGATGTTAGACAAACAGGTAACAAAAGTCCAATTAT
93	34318	a34318	1	35.186	Fvb1	16346475	AAxAB	0.07	1	8	-	32;G/C	AATTCTTTCACACCCAGTTTTAGAACTCCATGGTCAACAACGAGTTGATCAACAAAGAACAGCTATTTCACCAAACTATAAAGCACTACTTGTGCACTAGCCACTAACAACCCTCTCCATTTCAATCATTTCCCACTCAGTCTTTCCCTGAAGAGGTTGAAACCCAAAACGTTTGAAATTAAGATGAACTTCCACAGGATGAGTAGCCTATTATTCATTATAACACTACTGGCCCTCTTC
94	24389	b24389	1	36.582	Fvb1	21192544	AAxAB	0	1	1	-	110;C/T_115;T/G	AATTCAACCCTGAAGCTCGAGGAGTGCCCTGGAATCTTGAGCACCGATTGCTCAATGGCGATAAACTTCTTGACAATGTCATTTTTCGGGGTTTAAACCCTAATCCAAGACCTACTTAGTGTGGCAGCTGTTGTTGCTCATCTGTATAATGAAGCTTCTTCTTCTGTTGGAGGGACTCCAATCAACTAGAAGATATGATCAAATGGCTTCCGCCCCCTTCTCATACTGTCAAAATAAAAC
95	16064	b16064	1	37.907	Fvb1	12983278	AAxAB	7.68	1	57	**	174;T/C	AATTCTTTAATACTTCTAAAGATTCACATAATTGTGCAATCAGTAAGGAGAAATTACCAGTATCCAGAATATATATTTGGGACTGGCATAGGAACACAGCCGCCAAGAGTAAAGGAGACCATCAGTAACAGCTGTTAAATCATCTTGCACGATTTCACTCAACTCCGAACAGAACCTTGGTACATCACTTGCAATTCGCTGTTCTGGATTAGTTATCCGACCATCAACATGAGACATTTT
96	5343	b5343	1	37.973	Fvb1	13189719	AAxAB	0.26	1	9	-	233;G/A	AATTCATAAAGTGCGCGCTCTACATATAATGACTACAAATCTCAAACACATTTATAATAACAAACTAAAATGAACAAAGGGCCTTACTCGATGGGGAGCTGAACCTCGGCTATCCCAGTAGTCCACTGAGTCGAGCTCTCTTCCGAGTTTCGCTTTTTCACCTGCAAAGAAACAATAGTCCGCGTTAAAAACAAAGCGAAAGGAGCTCTAGACACCACCAACAGAGAATCTGCAACAAGA
97	22064	d22064	1	38.057	Fvb6	29961963	ABxAC	3.96	3	51	-	44;A/G_117;A/G_191;A/C_238;G/C	AATTCTCCTCCATTGTTCGCACGTAAAATTTTAATGTCTCAATGAAATTATGTTTTAACCCAATCAAAGAAAGATTTTAATAAAGTTTGAGTGTTGGATTTAAAACTCATGAGATGTACCCAAGTATAACGAGTAAAATCATCGACAATAGTTAGGAAATATCGAGCCCCAAAATGTATGTGAGTTTTGTGAGGTCCCCAAATATATATCACAATGGATTAAAGCAAATGGTGTAGTTGT
98	20956	b20956	1	38.124	Fvb1	9015761	AAxAB	0.57	1	2	-	205;T/C	AATTCTTCTCTCAAATTCGCCATGACGCTCTCTCCTATAAACTCTCTCTCTCAGCCGCGGCTAGGGTTAGGGTTTTCTGAGATCTCAGTTGCGCGGCGTAGGTTTTCCATGGCAACCTCAGTTGCATCTATGACCGCTATCATAACGTCAAAACTTTCTCTTAACAAGCACAACGAACTTGTGGATCTCAGAGATCTTAGGTGCCCTTCAAAAGGGTTTGTTGCTCCATGTTTTTACTTG
99	10572	a10572	1	38.154	Fvb6	29884422	AAxAB	10.32	1	69	***	62;T/A_165;G/A	AATTCGGTAAATACTTCTTGACACTATCTAATGGTACTTTTGTGTGTAAATTTATTGGTCTTTATTTCATGGTGGTCCAGAATGATCATAGTACACACATCTAAAACACGATTTAGAGACTTCCTATGAAACGAAACACATATATACTGTGTATACACTGACTGTGTGACTGCAGTTGAAGCAATTCTGCTCTGATTCATCTCTCATAAGGAAAAACTTGAACATAATACATTGTTTTCT
100	6735	a6735	1	38.186	Fvb1	13931661	AAxAB	10.91	1	39	***	12;C/T	AATTCACACAACCTCTAACATAAATTCCTATTCGAAGTGGTTACACATTTCTCAGTGCAGATAATGAAAATATTGCTGAACTGTCATAAATCCAATCATCACAAATTCAGACTTTATTTCTTGGTTAAGAGGCCATCTATCTCTTTGATCCATGGCCTAGAGTCTCGAATCATATCTCTGTTAAGGGCAGCCCTATACTTGATTCCTGTAGGCCTTCTAGCAACTAAAAGTAAGAGTTTC
101	19472	a19472	1	38.677	Fvb1	22433994	AAxAB	1.48	1	13	-	49;A/G_110;C/T_175;T/C	AATTCTTCCCGCTACTCATCATGTCATTACAAGTTTACAAGTTACAACTACTTGTAATATTATGGGGCCACAAAGGCTTCAACCCATATATAGTGCTATTTTAAATGTTCCTTGCCTTGGTGAGCTCTAGCTCTTGAGTGTTCTTTTTGACACTGGCCTCCAAAACATCGCTGGATTTGGCAACCTGCTTTTTGATTTCGTTCATCTGGCTATTGAGTTCCTTCTTGGATTCTTCTATGT
102	40243	a40243	1	39.447	Fvb1	20306480	AAxAB	6.72	1	52	**	136;A/G_154;A/G	AATTCCTGACCAAGTACATTCCAACGTCAAAGATCACGGTGATGAGAAAGCAAATTACCAAAATCCAGCAATGTCACACCCCGAATTTTGGATAAATAAAAATTTCAAATTCAAAGCATGATAACAAAAATAAAAAAATCAAATAATACAATCTAACGTTTACATAATTTTAGAAGTCAAGTAAAGGTCACACTCTAAAGAACTCACTACAATTTTACAATCAAAATAAAGATATCCAAC
103	31857	a31857	1	39.978	Fvb1	19444061	ABxAC	3.27	3	63	-	49;G/A	AATTCTTTTGTGTACACCTTCTTATGAATGCGGATTGAAATGCATCTTAGAGAAATTTATGAGTCAGTCTAGTGGATTGTATGTCACTATGCTTTGAATATCGAATTACATGTTGTCGCCAAACATGATATTTGGGATACCGACTCATATAGGCTTTGATTTGACCAAATCGGTCATCCTGGAAGAGACATAATGGTCCAAATTTTGAGAAATTCTCATGGACATCCATTCTTCCGCTCA
104	30435	d30435	1	40.195	Fvb1	22681981	AAxAB	10.51	1	35	***	45;G/T_222;A/T	AATTCATATTTCAGTTATTTTATATTAATTTTGGTGATATATGATGAACATGAAGTTAGTATGGTTTACTAATACCTTCTGTTTTTTTTAATGTATTTTTTATACTTGAGCCGACGAAATATATCATAATTCGTCGGTTTAAACCATCTTAGCCGACGAATACCCTAATATTTCGTTGGCTAAACCCTAAACCCTAAACCTTAGCCGACGAATACCCTAATAAACGACTTGTTGCGTCTC
105	30719	b30719	1	40.623	Fvb1	22279572	ABxAB	1.19	2	5	-	154;G/A	AATTCATGCAATGCATAACCAAATTGATCCAGTTAGAGTGAAAACCAAATCTGGTTAAACAATGCTGTATATAGGACCAATCCAAGAAATCGTAAGCTTTCTCCAAATCTAGTTTGACTGCCATGGCCCCATTCCTCATCTGAAACCTGTTGCAGTAATATAGAATTGTCATTTGAGTTAATAACAGGTTCAATAATTGAAGTAAAGTCTAAAATGTTGTTAATATTTGGAACATTGTCT
106	37510	b37510	1	41.731	Fvb1	14328470	AAxAB	3.03	1	26	-	216;T/C	AATTCGTTCTGATTTCCTTAATAGCTTTTCTAACAGTCTAGCAGATACGTCTAACCTTTTCAACCTTGTCATTAATTGCAGACGAGACGTGGACAGATGCTCCAGTTAAAGCGCCAACTAGCTTCCTGTTTGAGAGAGGGAATCCTGAGTTGATGAGTGTGATGTGTACAGCTGCACTGGGAAACAAATAGGACTTGGCTTATAGTTAGAGACAGGCGTGGGCATTTGCTTCTCGCAAAT
107	30851	c30851	1	41.855	Fvb2	11531188	AAxAB	13.29	1	42	***	235;C/T	AATTCCTACCAGTTGAGTCCTTTTATCACAAAAGTGGGTCCTTCTCTGTTATAATCTTCTTTTTTTCACAATTTTTTTATTTTCGTTTAAAAGGGCTGTATCTGAAAGTAATACAAAGTGGAATCAAACAATTTGAAAACATTGAGAGTACCCTTATTATGTTTTCAGAATTTTATTTTGTTAGATTCACATGATATATACTATTGTATCGTTGTGTTATTTAAAAGGATATTTGCATAA
108	11694	b11694	2	0	Fvb2	20618108	AAxAB	4.97	1	29	*	174;T/G	AATTCTTTTGTGCAAGGGAAGCAATCACATCACCCAAAGCTGAGAGAGATCTATTAATATGCTGTGCTTCCTTCAATCTATCCCCAGTTACCTCAGATTTGTCTACCCTCTCACTTCCTGCAAGATCAACCAGGTGCATACAGCCACGAAGAATAGATCCAGTAGTCAAATCCCGTCCTTGAACATGAACAGTCAAGCAGCTGCAGATTGATTTAAGTTGAATTTGGATTAATACATGCA
109	26419	a26419	2	2.97	Fvb5	28155491	AAxAB	14.16	1	43	***	42;G/A	AATTCTCTTTTGCATATTCCAACCTGAATCCACAAAATGAGCGGTCACGACCATATAGTTTATATTCTGCACCGATGTCCATGTATCGGTTGTCAAACTTAAGCAATGACCCTTCATCTCATTCCTTAGCTTTGCCTTTTCTTCTTTATACATTGACAGAAACTGCTTCACAATCACCCTCCTAGAAGGAACCTCCCAATCAGGCACTGCATATCTACAAAAGTATCTAAAACCTTCCTT
110	15809	a15809	2	3.684	Fvb2	21487819	AAxAB	1.8	1	20	-	13;T/C	AATTCTATATAAATGGGTTGGATTCTTTCTCAAAAAAATTATTTGTATCTTCTACATTAGGGTACAGGAGTGACTATATATAGTGCTTGTATACAGATTTCTAATACCACTGTGTTTCTTTGTGTCATCAAGCTTTCTATATGTAGTAACTAATTGTGTTTTGCATTTCACTTTGCAGAGAATTGCTGAGAGTATGGATACTAAAATCAAGAGCTGGGCTGCAGGGAAAGAAGGGAATAT
111	28678	b28678	2	11.571	Fvb2	20023079	AAxAB	0.01	1	2	-	188;T/A	AATTCCTTCTGGAAGAAATGACCGAGTAGATGCAGATTCGACAAGGGGAAAATCACTGCCCTTGCCACCCTCTGGAGGAGCTCAACCAGAAAGGACTCGTTGTCCCCGACCAGTCTCTGGTTCTCACAAAGGTAATGGAGCAGATATATTACAAGTAGATGGCTCTGAAGGTAATGATTCAGTCAAGGTGCAAATGCGGAACAGAAAAGCTGATACTCAGAATGGAACTCAGCATATTAG
112	39849	d39849	2	12.538	Fvb2	19730196	ABxAC	0.25	3	6	-	203;T/G_232;A/G	AATTCACATTGATACAAGGCAGTATACATATATACAAGGCGAAGTCCTTACCTACATGGTAATCTCCTACAATCAAACTAGAATCAGGAATACAGTAGGAAATAGATAACTACAGATTATACATTCCTAATACAATTGATACTCAAGATCACTTTCCTAACAGCTTCTTCTATGCCAAACCACATTTCCTTGGTACATTGATGTTGTCCACAAAGCCATCGTACCTAGACTGATTGTTAC
113	30835	a30835	2	16.091	Fvb2	19379874	AAxAB	0.04	1	33	-	138;T/G	AATTCATGATCAGCAAACAAATACAATCACCAAACTCAAAAGAGAATAAGCATTCTTTTCATTTACCTCAATAACACGTCCTACAATAATATCTCCAACCTCTGGTTTATACCTACCATCATATTTTCCACAACTCAATCATCACAAACACCAAAGCAAACCAAAGAAAAACTCAAGCACATTGAATCAGAGACTACCTAGCTCTCAAAGAACGCACATAAACCAGCTTATTCACCCTCT
114	40149	a40149	2	18.54	NA	NA	AAxAB	12	1	37	***	19;A/T	AATTCGTTCAACTCACCTTAATTGATTTTCAAGATCCAAACGCTTTCTAAAGAAACTCGGCGAATACAACACTGCCGAAATGAGAGACTAGAGAGTAAGATGCCAACGACTCAGCAGACCTCTCAATAGTTGATTTGTAACTGAAGTCGAGTCAGGAATCAAGTTTGGAGCAGTCCAGAACGTCGTCGTTGTCAAGGAACTCCGATTAGGACGAAAACCCAGAAATTCCAAAATCGTTAA
115	38046	b38046	2	23.355	Fvb2	17440034	AAxAB	9.66	1	39	***	197;T/C	AATTCATGTCTCTTTCTGTAGTCATAGACTCATCCAATGTCACAGATCTTATTTGAGAACTTGGTAACGGTGACTTGTGATTTACCCCGCCATTAAATTTAAGTCCTGAACTCAAGTCAAATTCTTCAAGGTTACCATCTATCAGCATGTACAGGTATCTACTTTCTCATTCTTGCCAATTCCATCTGTCACAGAATCTTTCTGAGTACATGGAACCCAAACTCGCTTATTACCCCTTGA
116	8902	a8902	2	23.719	Fvb2	17090143	AAxAB	7.76	1	29	**	70;A/C_72;A/T_212;A/T_217;C/A	AATTCAATATGTGGAAATTCAGTAGTTAAGTTTCTTACCTTTCTGACTTTAATCTTGTTTGATCAAAACAAAAACAAAAAACAAGCTCCTATGAACTTTCAATAGTCTCGTAATAATACGTATCAATGAAGAATGAAACTCATAATAATGTGTATCAATGAAGAATGAATCTAAAGACGAGATTAATAGATATTTAAATTATTGTTAAGATTATACGCTATGATGTTAGACTATAGAATT
117	23014	a23014	2	23.944	Fvb2	17182195	AAxAB	11.37	1	31	***	131;G/A_137;G/A_185;G/A_229;C/G	AATTCGGAACCAAAGTAATCCGATAACAACCAGACCACATAATTCATAGGATTCTAGCTTAAAATTTATCCAGACACATGAAAAGAAAAAAATAGACACAAGACAGACAAAGTCACAAAACAAACTAACCAGGATCCGTCATGAATCAGTCAGGTTAATTTTCAATCAATCAAGTTAATTTTTGCGCCCAGTTGTTTAACATCTAGTCGAAATATATTTTTGTAGTCACCAAGTCACTCT
118	27744	a27744	2	28.34	Fvb2	16168344	AAxAB	1.56	1	19	-	54;T/C_86;C/G	AATTCAATTCCACCAGAGAAGAGCACAGAAGCTTTCTTTAGTAAATTGCAGAGTTATATTCCAACCCAGGTCCAAGTTTCTCACCACAAAACGATACGCTTTTGACCATGACGAGGTTAAAATCACCAGGATAAAGAGTGGTCCTTACCAAATCTAGGTTTCTAACCCAGTAACATAGCTTAGATCACAAAATAGTTGACTGTTTTGACTGACATTTTCGCGGTAAAAAAGTCCAGTTTT
119	9219	a9219	2	32.857	Fvb2	14074174	AAxAB	4.75	1	43	*	107;G/T	AATTCTTGGATTAATAACCCTTCATCTATCCACCATTCTTCTTTCTCATATATCACCTTCAGTTCCACTTCCTCATCTCCGAACTTTAAACTGCGATTTTCAATCCAGGTTTCAGCACCACAATGACTGCTATCCCTAACCAAGGCATATAGCGTTCCTCTACTGGAAAACAATATATGATCAACACAGCCAATACTGTCGGTTTCATCAAATACCTGAAAGACGCTCCAGCTTTTGTCT
120	23986	a23986	2	33.561	Fvb2	14553385	AAxAB	0.75	1	11	-	230;A/G	AATTCGACAGAACCCGTGACTATTACACACCATCTTATACCTAACTATTTGTACTAGGGAAGAGGCAACAATTTGGAAATGAAGATCAACAAATTGGAAACTTCAACAAGGACAGAAAGAGGGAGTGGTTTGTTAAGAGTACCTGAAGTTTCTCGCAGAGTTCTACAGAGCTCCAAGATGACTCATCCAATGGGATATTGGGGTCAAAATCATCACCAGCTCTCACCCTTACAGCTGAAG
121	31940	a31940	2	35.742	Fvb2	13393152	AAxAB	0.07	1	8	-	14;T/G_202;C/T	AATTCAAATGCCCCTTTTAGCTGTTAATAAATAAAATTAAGAGCTCTTATGTATGATAGGATTGTTGTTTACGATATCATAGGAAAGAAGATGAAATGCTTTTGTTCTGGGCAGATTATGTTCATACAGGACAATTGAAGTGCGGTTTATTGTTGCTCTTCCGCTCCTTTGTTCTCGTAATGGATGATATGCTAATAATATACTTCCATGACTTTAATTGGGCGAGATCTTTTATGTATT
122	6254	a6254	2	36.92	Fvb2	3912434	AAxAB	15.38	1	41	***	48;C/T_153;A/G_163;T/C_167;A/G	AATTCATCATCCGATCCATCCGCTTCACTGCCAATTGGATGATATTTTCAGTCAGAAAAGATATAAAAAAGTGACAAGAAAAATACATAATAAAAAAACAAAAAAGCATAATGTACATGCATCACACAGGCTGCAAGAGGAACACCATAGAAAAAACATAGAATATTAATCATAATCTAAAATTTAAGCTCTCAATGAATCAGACAGGTGTAGTTAATAGATTATTCAACAAGAGCAGAT
123	3996	b3996	2	38.962	Fvb2	4070394	ABxAB	1	2	1	-	26;C/G_57;T/G	AATTCGCAGAGGTAACGATTTCGAAGCGCGATTTGATTTCTGTTCAGTGGACATGGCTCAGGAGAAGTACTCTCAGCACTCTTTGTTCGGCGGCGCCATTTCTAGCCTCTTTCCTGATCGATTTCAGGTTGGGCTTTTTTCTTTCGAGTTTCCGTTTCTTCAGTTTTCGGCTGTGTGTTTATTTTTAACTGATGAACCTGTGCACAAACGCAATTACAGGATGTGAGCGATGTCCGTGAG
124	14517	c14517	2	40.268	Fvb2	9994679	AAxAB	15.71	1	38	***	23;C/G	AATTCTGTCTCTCTTCCTCTTCTCCTCTCTCCTCTTCTTCCTCGCCCGCGCCGACGTGGACGTCTCCGATCCGTTGATCCGCCAAGTCGTCGACGGCGGAGATGAATCCCCTCACCACCACGATCACGACGGCGAAGCGATGCTGGGAGCTGAGCACCACTTCTCGCTGTTCAAGAGAAAATTCGGGAAGTCGTACGCGAGCCAGGAGGAGCACGACTACAGATTCTCGGTGTTCAAGAC
125	37826	d37826	2	41.861	Fvb2	6309106	ABxAC	2.79	3	12	-	56;T/A_94;G/A_132;A/G	AATTCAAGGGCGGTGGATCGGAGGATTTGAATCCGATATCTCATACAAGCAAATACTACTGTGATACCATGTAAGACAACCACCGACCGCTAGAGGCCTAAAGATTTAAGACATGGACAGAGGATTGCATCAGAAAAATTAAGTTGATAAATGCTTGACAACGTACTCCCTCATCTATTGATCCCTACACGATCACCCTGAAATGTAGTTCAGTGAATTGATTGGTACATTTAGCATGCA
126	34683	b34683	2	42.104	Fvb2	1171481	AAxAB	6.84	1	22	**	87;A/G	AATTCTTACAACTTCACTAATGTTGTATTTAGTCTACTCAGCAACCCCCAGTTCAGTACGTGTTTTAGTTTTCTGTAGTTCAAAGCCAAACTTGAGTAATTTGACCATCCGCTTGCACTTTCTGCCCAATGTCTTGTGTATGGATGTTAGTTTTTGGTCAAAAATTTAGTTGTTCTATCAAGTAGCTTATTGTTTCCTTGTTGACTTAAACAAGTTTTTGTTTTTTTGTTTTTGTGTGCT
127	19113	a19113	2	43.04	Fvb2	1924300	AAxAB	2.33	1	35	-	151;G/T	AATTCATGAAATTTTATCATGCATGTATGGCATTGTTGAAATCTTTGTCAATTTATGAAAGCCTTTGAATGTAGGATCCTCACTCTAGATCATAAGGTTTCTCTTGGTTTTGTTCTTAAATGGAGCAACACCATATCGCTACACTTGGTTTGGATTGTAGCTATTGTTTTTGGGACAATGTAGTATCTTGGTGACCTTTAGTTTGACATAGGAATTTTGATGAAGCAACTTTCATGGTTT
128	5410	a5410	2	43.161	Fvb2	1830855	ABxAC	2.67	3	13	-	169;A/C	AATTCTCTTGCAGCCATCCACAAAAAGATTGCTACAAGTTATGTTATCTGCGAAGGATTGCCGTGATATCTCTTCTATCACAGTGGTAAGAAATTGAATCAGTTCGAGGTTTATATGGTTGAATGAAGTCAGTCTCAAATATTACCAACTGATGATATATTAATCAGTGAATAGAAATAAAGTTTCATGCATCTTGTCTGTAGAATTATTCTGTAGTACTGTATATCATGCATATACCAA
129	9941	d9941	2	43.951	Fvb2	10889760	AAxAB	1.4	1	5	-	59;G/T_128;G/T	AATTCGACAATAGATCGGAGATGAGTAACAAGAGATCGGAGGTGTGCTTGAGACGATTTGTGCTTGAGGCGAAGTTGGAGGTGTTTCTGATGGACAAGAGATCAGAGATGAGTAACAAGGGGAATGATGTGGCTTGGCTTGTGATCTGTGTGGATGTATGAAGCAGATTATTCTTGGCTTTCATGTTGATGTTGGGAAACTTCAATTCATCGTTCCTCAGTACTGCAAGGTCAAAATTCC
130	5856	c5856	2	45.142	Fvb2	4742229	ABxAB	2.32	2	21	-	186;G/T	AATTCTTTGATCCCAACCAAAAATCCTACTGTCGATATGGATCAGAAATTGATGAACGTCTTGACAATATCTTTCTTGTTAGTGTTGGCGTTTACACCAGTTCATTCCTCTGTCTTCTTCGACGTGACTAGTGCAAAATATGGTGGAAAACCAAACACAGACATTACAAAGGCTTTGCTGAATGCTGGGACTGATGCATGCGCATCGCCATGGGAGAGTACAATTTATGTTCCAAAAGGC
131	40484	d40484	2	50.127	Fvb2	22906171	AAxAB	11.45	1	38	***	25;C/T_138;C/A_173;C/T	AATTCAGATATGCACAATCTTGTTATAAGATTTAAGGAGAAGGATTACTCAACAAGGAAATTAATGTAATTATATCACTAGAGAATAAACGTAACAGGCATAAACTGAGATGTGTTCCCTTAATTTAAGTTTAAAATGCAAAAAATAAAATAAATAATCTGAAGTTAGAAAAGCACCTCACCAGTGGCTCTTCCTTTAGACCAAATTATTGGAATGTCTAAAATCCGTTCGAAAAGCTGC
132	21910	b21910	2	52.807	Fvb2	24031106	AAxAB	0	1	7	-	162;T/C	AATTCATTAGGCTTGCATCACATGATCTCCAAGCAACAAAATGCATGCAAAGTAATTGCATCACACCAACTAGATTGCAATTACATATTTGATCAACTAGATTGCTAGGCTGATCAAATATGTGATCCCAACTTTTTTTAACAGTGAGTAAAAAGCCTTCACCAACTTATCCACAGCCCAACAAAAGGAACAACCTTTCATACTATGTGATCATGTACTACTTCTAATCAATTGAAATCG
133	31381	b31381	2	54.541	Fvb2	24692541	ABxAC	31.33	3	42	***	17;C/G	AATTCTCTCCATGTAATCAGGCAATGGCCTTCTCTTTGGCTCCACCTAAACAACAGTTCATTGAAGGTAAGCCTAATTCCCAACTAAAGAATCAAAATTAAACTGCAAAGTTAACCATTATTCAATCAAACCCAATAGCATCTACCCAGAATCAAACTTAAACCCATAAAGTTACAAACTTTATAGCCAATTCTAATTATCAAATCAAACCCATATCATTCCAATTCAAAACCATGTACT
134	36690	b36690	2	56.185	Fvb2	24294546	AAxAB	27.97	1	52	***	182;G/A	AATTCGACATCTATCTATGTAAAATTCAAATCACGTAGGTTAATCCAATCGCGCTCTGCAGTTGAAGCTAAGCGAAACGATGGAGTAATGAAGGAAGAAGAAGAACAAAGAGAATGAGGATTTGGAGTATTGAGAGTGAGCAGTACTTACAGAGGATAGGGCGAGTGGGCAATTAGCGGCGCGAGGAGTTGAGGCGCCGAGGAGGAGAGATCTCTCTGAGTCGTCTTCTTCACCGCTCTG
135	23414	b23414	2	57.697	Fvb2	27086904	AAxAB	0.33	1	37	-	48;A/T_189;T/C	AATTCGCTAAGTTCTGGTGGTTGTAGTGTTATGTAATGTTTTGTTTGTAGTATATTCTCTGTTTCATGTACTTGCTCATAAACAATCTGTAAATGCACACTGTTTCTTGAAATAAATATCCAATAAACCATTGTATTTGGGATGTCCTATGAAGCTGAATAAACTGCATAATACTAGATCAAATAACAATGTTAAATGGTGGTGTATGAATGTACGGTAACAACTGCATCATGTTCTGTA
136	17872	a17872	2	63.575	Fvb2	27024678	AAxAB	0.11	1	3	-	59;C/T	AATTCTATTGGAATCGGCAACCAAGCTGCAACTAATGTTACCAGCAACATACAGTCTACCATGGTGAGCAATGCACTTTTCTTGATTACAAGTTTACAACCATACATGTGTAATAGGCCTGTACACTGTTTGTAAGTTCTCAGTCTGTACAATAGATAGCATAAGTTATAACTTCTCTTGGCCCTGCTACTTGAGTTCATTATTCTTTGACTTTGTTGTAATCTTGCAAAACCAACATGT
137	10934	b10934	2	63.687	Fvb2	28242166	AAxAB	0.01	1	8	-	144;A/T_212;C/A	AATTCCCAAACAACAACTTCCCCTGACCAATCAGCCCGTCTAGCGAGTCCTGAAGAAGAACACCTTCCTGTCCTACAATCGATCTCTGCACCGCGGTCCTAACTTTCGACAAGTAAGAAGATGGCATCTTACCCTCTTAAACAGAACACCTTAGCTTCTAAGCCTCTAGTGCACCGATCAGCACCGTACCCTAAATTAAATCTCATAACTATCTAAACTAACTTCATCTCCATCTCCTAC
138	14798	a14798	2	65.922	Fvb2	27627958	ABxAC	2.56	3	28	-	148;C/T	AATTCCTCAAACCCAACTTCAACCGCCTATTATCAATTCCTTATTGCCCCAGCAACCAAGCTGAAGACAAATTTAGAATTACATGAACACCTATGTGCCCTTCTCTCCTCCTACCTGTCTCTACCCTCTACCCAGTTTAAAACTGCTCCCAAGTCTACTTGATCGTAATGTAGCGATTTGTTCCATGCTTGGCCCAGTTGTCCTTGAGATCAACTGGGTTTGACAGATCATGGCCTTCAG
139	29274	a29274	2	66.425	Fvb2	28736730	AAxAB	4.08	1	47	*	102;A/T	AATTCCCATCAGAAGTTGTTGAAGTAGCTGCAGAAAAAAGACTCTCAAGTTCTGACATGTCAAACTCTGGAGCCCTGGAACACAGTTTATGAGATCAGAATTATGACATCATGCGATGCATGAATTGAAAGATCCATTAAGTGAGGCCTACTTGGTTGCTTCATCAGGTTTCTGAGCTTCTGCCCATAAGCTCCCTTGCATGGCTCTTGTTAATTTTAACCAATGATATGGCTTCAGATT
140	37727	a37727	2	66.708	Fvb2	28004343	AAxAB	0	1	3	-	47;T/C_204;G/C	AATTCGTTTCCACAAATGGGTCTCATTTTTCTCCTTAATGTTGATATTTGTTTGCAGAAATGTGTCCACTTGCCCTTTTCCTTTAAAATCGAAAGGCAAATATTCTTGAAGGTTGATAGTCACTAATTTTAGTCGGTACTATAACTACCAAGTTTGTCTACTTTTTCATGGAAGACTTCTAGCGACGACATACTCGTTGGAAGTGTTACTAAATTCTGACTAGATTTTGTTGTGAGAAAG
141	5731	d5731	2	69.718	Fvb2	28543351	AAxAB	12.04	1	49	***	19;A/C_42;C/T_121;T/C	AATTCTTGGCCATCTCAAAACCCAGCAGCTGAGTCTGGTAGCCCCCTTTCTCTCTCTGAGCCAGAGCTGGTCAGAGTTGGATCCCCAACCCCCTAATCCTAATCCCTCAAATCTCGCTTCCTCAGTTTGAATCCCAACCTCCGATTCAACTTTACCGTCTCCAATTCACATTCTGTTGCTACCAAAATGGCATTCCCTGCCTGCTGCTAGCCTTTTACAGGTCGTCCTTGTTCGTCTCCG
142	31330	d31330	2	0	Fvb2	5366571	ABxAC	21.1	3	47	***	45;C/T_212;C/T	AATTCGGTGAAAACATATTTTCAACAGAGATCCTAGTAGGAAAAACATGTGTCCACACTAGCTAACCCCAATGCATTGAGCATGATTGAGAAATGACCTTTATCTATCTTAATGTAAAGAAATGCAGCCCTAGGATATTCTGATGGATGTTTGTTAGTACTGTCTTTTAACTCACAAGCTTCTGGAGCATACTTTTGACTTCATACACAAAACTTTGAGTGGAAGTGACTAATAATCCAA
143	37126	b37126	2	2.531	Fvb2	11512475	AAxAB	0.03	1	17	-	121;C/A	AATTCTGCATGGGTATGTCTCTAACTTGACGCATTAGAATTTGTAAGGTACCCAGAATGCATCCATATGTTATGGGAATCTATGATTTACAAGTGGGTTTGAACAGGAGAAAGAAGAAGGTCTATGCGTGGACTGTTGACGATGCGAAGTCCATGGAAAATATGTTGTGGGAGCGCGTCGATGCCATTGTGACAAGCAACCCGAGTATGCTTCAAGGTCTAATGCAAGATACCAGAAGAG
144	25704	b25704	2	6.114	Fvb2	5250251	AAxAB	11.67	1	40	***	69;T/G_126;T/C	AATTCCTTGTTACTTTGTTTATTTAGAATAAGATTGTTGGGTTGGTCTCCATGTGAAAATACATTATGTTTGTCACTCCCAACTGTCACTGCTCCAAAGTAGCTGATTAAGTGATTAACAATTATATGGTTCCCTAATCTCTGATCATGTAGTATAGGAATTAGGTGTTTCTAATAATTGATTGTGTGGTTTATAGTTTTCTTAACATTTGATCATGTGCTAATGAATGATCATGTGTTT
145	30117	a30117	2	10.624	Fvb2	5220876	AAxAB	0.86	1	4	-	28;A/T	AATTCTTACCGAGGGTAGGGATTTCTTCAGTGATCTTCTTTATAAGCTCGTTGGGTTGTGGCCTTTTGAGCTTGTTGAATAGCTGAGGTGTGGTTGTTCATTTGTTTCACGGTTTCTCAATAATCCAAACAAGAAGTTGGGTTGAAATAGGAATCTCAGTAGGTTTGTCATTGGAGTATTGCCTGGGTTGTTGTACTGCTACTTTGAAGCTTAGGCATGGTCAGTCAGGGTAGAAGTGCC
146	23349	a23349	2	12.557	Fvb2	11296941	AAxAB	2.37	1	50	-	145;A/T	AATTCCATGGGAGGTGGTGATTCACCAGATATCTTTAGCTGGGATAACAAATATGCTGGTGCTTATGTGCTGCTATCAAGGGTAAAATCCCATATCATGCCAATCATCTAACTTTTACAATCTTATGTAAAATTGATTTCATCTAATTAAATTTTTTTCAGCTGTAAATCTATGTAATCTGACAGAATGGTTTGCTTTACAGAAAGCAATCTTGAGCAATGACAAAAAATTTGACTCATA
147	5857	a5857	2	15.282	Fvb2	4742229	AAxAB	9.53	1	9	***	8;A/G	AATTCCTTAAGCCCAACCAAAAATCCTACTTTCGATATGGATCAGAAATTGATGAACGTCTTGACAATATCTTTCTTGTTAGTGTTGGCGTTTACACCAGTTCATTCCTCTGTCTTCTTCGACGTGACTAGTGCAAAATATGGTGGAAAACCAAACACAGACATTACAAAGGCTTTGCTGAATGCTTGGACTGATGCATGCGCATCGCCGTGGGAGAGTACAATTTATGTTCCAAAAGGC
148	42236	a42236	2	18.986	Fvb2	1591498	AAxAB	5.57	1	50	*	17;T/A_116;G/T_175;A/T	AATTCGATTCGATTGTCTGGGTGTTGTGATTTTATAATTGTGACATTTCTCCAGACTGCAAGTGTATTGTTTGTGGATGCACCTGTTGGCACTGGTTTCTCCTATGCAACTAGTGCGGATGAATACCCTTTGTCAGATTTAAAAGCAGCAGCTCAGGTTACTGGATTTTTAAGAAAGGTAAATGTTAGGACACGAAAACAGTACTATTACTCAGATACCAACCAAGTCTTTAGGTTTGAC
149	23228	a23228	2	23.722	Fvb2	259771	AAxAB	4.7	1	12	*	53;A/G	AATTCTTCTGGATCCTCTTCAATAATCTTTTCTTTTGCAATGTGTTATCATTAACAACAAGAACTATTTATACAATTTACATGCATCAGGAATCAGAAGGTAGAAAGAAAACGTCATAACTTAGCAGATACAATCTCAATGAATTAATGACAAATACTCTCATTTAGATATAACGTACCATAATTTATTTTTGGCCAAGAACGTTGCTTTATTTAACAACTTCTTTCTTAGCTGTGTAAT
150	8805	a8805	2	27.05	Fvb2	5934967	AAxAB	6.57	1	34	*	109;A/T	AATTCGAAACAAAAATCAATGACACGAACAACTTGACTTCTGGCAAGTACCCTCTATTCCTCTAACATACCTATAAATACTCAAACCAGCTGATATAATCCATATTCCAAAACACACTCCAACTTGAGCACACAAAAGCATACACATGAAAACAAACCAGCAATCAAAGCAAAAGGAGAAGGAGTAGTAGAAAATGAAAGCAATCAAGGATCCAATCTGAATTTTTAGTCGCTGTAAGCA
151	28912	a28912	2	32.089	Fvb2	6867646	AAxAB	6.63	1	0	*	52;A/G	AATTCTCACTTGTTATGTGCTTGATATTTTGTCCCAGTTTCCAAACATAGGCATATGTCGGTACCAAGGTCAAGGTTGCATTGTGTTTGGACAAGTCAACTTTGAGGTAGGCGTGATGGTACTTATTGGTAAGTGATGGAGAAATGAAAGATAAATAAACAAATAAAAACCTAAAATAATAGGAACAAAGGAATGCTCAATTGATCATAAGGGATTTTATGTTCAGTTCTTCTTTTCTTT
152	8391	a8391	2	37.036	Fvb2	10002283	AAxAB	1.6	1	55	-	208;A/G	AATTCTTTTTTTTCCCCCTTTTAAACCAACCAACGGATACCTGCTTCGATGCAAAAATAGGACTCCAACCCTCACCCACAAGACATTTTTTTGTTACATCAAGGCTAAGCATATTAAGAGTGTGGTGTATGGCTTTCTCCTTCTTCACCTGCATGAGTACAAAAAAGAACATTATAAACTACCTTAACTTTCTGCAACATTTTGCAATACATACAAACATCATATATGAGACAGTACATA
153	30554	a30554	2	38.273	Fvb2	10084199	AAxAB	10.31	1	5	***	118;C/T	AATTCAGATTTAAATATGTGAGAGGAAAGGAAATCCCTGTATTAATATCTAATATAAGCTACCAAACAGTGACATGAACATGCATCCTTCTATTATAGGCCTTCCACATAAGGCATCTCCTCGTAAGTAATTTGTCTCTTTGGAAATAACAGTATCCAGCATTCAAGGCTTAACATACTAGGTTCAGAAAAAGAGTAAAAATGACAACAGCAGATACCATGCTTTCTTTGTAACTTAGTC
154	14209	a14209	2	38.618	Fvb2	2305063	AAxAB	0.47	1	40	-	98;C/T	AATTCAACTGTGTTGCTTGAATTGCAAGAAAGGAAGAAGTTGGGTGATGGAGAAATGGCTGTGTGTTATGTTAATATGAGACATCATTCTACTTGTATCGCTTTGATTCATGCAGTAGAGTTGTCGTATTGCAGGCTTATTGCTATGACCTTTTGGGAAGGTTGGACGTGCATGTGGAGTTTGATTAAGACATTGAGTCTTTTAGTCTGAGATATAGAAGTACGAGGGTTTGAAAAGGGA
155	18680	a18680	2	40.247	Fvb2	3868337	AAxAB	3	1	37	-	226;C/A	AATTCCAGATCTTCTTTCATCATCAACAACTACTTGAATGCCTTGCTGACTCTGATGTTGAAGCTTCGTCGTCGTCAGAATGAAGCTACTGGTTTCCGTCCTCTTCATTTCCCTTTGCTTCTCCTCTTCCGTTCTTCCCGCTATCGCTCGCGGCGGCATTCCCAGCTCTAACCCCACAGGTCCCCTCTCTCTTCTTATTATGCATTCCTTTGTTTCCTGTTACATTCTTAACTGCCGTAA
156	3800	a3800	2	40.752	Fvb2	4070394	AAxAB	14.9	1	3	***	164;T/A	AATTCGCAGAGGTAACGATTTCGAAGCGCGATTTGATTTCTGTTGAGGAACGACGTCGTTCAGTGGACATGGCTCAGGAGAAGTACTCTCAGCACTCTTTGTTCGGCGGCGCCATTTCTAGCCTCTTTCCTGATCGATTTCAGGTTGGGCTTTTTTCTTTGGAGTTTCCATTTCTTCAGTTTAACTGATGAACCTGTGCACAAACGCAATTACAGGATGTGAGCGATGTCCGTGAGGTTC
157	37962	a37962	2	40.821	Fvb2	3141103	AAxAB	14.36	1	4	***	184;G/A	AATTCGTTAAATTTAACCCAGACCAGATTCTCATAATAGGAGGAAGTCTGGGCAACTCATCTCTTTAATCATTCAACCCAATCAACCCTAAACAAGCAAATCAGACACTAAAAATCCATTATACAGTATCAATACCTGAAATCGACTCAGAAACTTCAATTCAGTAGATGATGGTGTGTTTCTGGGTCACATTCTTTCTTCGATGTTAGCTACTTTCAAATCAAAAAGACGACGATGAGG
158	28584	a28584	2	41.356	Fvb2	4295024	AAxAB	10.29	1	19	***	176;C/A	AATTCCAGATCACCTCTTTCTCCAGGTTTTTGGTTTCCACACACGGAACGCGAAACTACCTGGGCTGATTTCAGATATGAGAAGCTTTCTGATTTTTGCTTCCGTTGTGGCCGACTAGGGCATATTGTCAACACTTGTACCTATGCTTTTCACCCCTCTGCTGATAAGCTCGGCCCCTGGATGGCTGTACAGGCGTTTCGGCGTGTATTAGCACCTGGACCAAACAACTGGGATCGTTTC
159	10903	a10903	2	42.356	Fvb2	9325255	AAxAB	16	1	1	***	95;G/A	AATTCTCCATTTATCATAGAAACATGGTTATTTAGTTAATGAAATTGAATGGTATTGGACCTGGAAGTTTAGGTAAGTGGATTGCAATGTTGACGGCCATTGATGTTGTGAGTTTCATGTCAACCGAACAAGAGTTTAGATTGTAGACTGATAAGACTTAACTGTCGATGTGAAAAGATTTTGGCTTGATATAGCAAATAGTTTTTCTGTTTTTCAATGTTAATTAAATCAAACATTACT
160	4754	a4754	2	42.438	Fvb2	9227989	AAxAB	12.97	1	9	***	194;G/A	AATTCAACTCGATGCGCATGGTAGCCACCACGAGCTCAGTTAAGATATGTCCATCTCTATTGTCGTTGATTTTTTTTTCCAAAGCTACAATATTTCAATATTAAGTTTATCAATAATAACAAATTAGAAAGAAAATATCCAAGAAGCATGTACATAAGCCATGTTCGCAGCTCCCCACTGTTGATCTCATAACGGTTGTAAAATAAAAATATCACATTTTCTTGTGATTGTTGAAAGGAC
161	37155	a37155	2	44.135	Fvb2	13514654	AAxAB	10.29	1	12	***	31;C/G_91;A/T	AATTCCCCATCTATTTTTCACATATCATGTACAGTGTAACACCCTCATATCTACGTCTTTTCTAGTTCATATTTGATAGTCAATTTTTTTAACAACCGACCATTGCTTTTGTTTCTTTGGTTTCTCTTTCTATATCATAGCAACTTAATATTACCATGGAACGGTATCGGTCTGGCTGAGCATTGTAACTTTTCAATTATCCTGCGGCTTCACAATGACAGAAATTGTCATGAGTTTTTG
162	38127	a38127	2	45.999	Fvb2	14221363	AAxAB	9.26	1	5	***	72;C/G	AATTCAAACTCGGGTAAAAATAAACAAAACACAGAGTAGCTAGTAGTGGGGGAGATGGAATCAAACAATACCCATAAGAAACGAGATGGGAGATGTCCTCTGCTCTTGCATTTCTCAAGTCTCTTGAGCTCTCTGACATTAGTGAGAAGCGCCACTTTACCATCCTTGGAACAAGCCATCCATGTCCCACCTTCCACCGCATCTCTTCCACCCAAAATCCTGTTGTTGTCATCCCACCAA
163	18054	a18054	2	46.449	Fvb2	14553385	AAxAB	9.8	1	20	***	120;G/A	AATTCGACAGAACCCGCGACTATTTCACACTATCTTTTAACTAACTATTTGTACTAGGGAAGAGGATTTGATATCAACAATTTGGGAATGAAGATCAACACATTTGAAAGTTCAACAAGGGCAGAAAGAGGGAGTAGTTTGTTAAGAGTACCTGAAGTTTCTCGCAGAGTTCTACAGAGCTCCAAGATGACTCATCCAATGGGATATTGGGGTCAAAATCATCACCAGCTCTCACCCTTA
164	5411	a5411	2	49.261	Fvb2	15726371	AAxAB	12.93	1	2	***	87;G/A	AATTCTATCATTTAATGAAAAACTAGGCTAAATGGAGATTCATTTTTCTGGTACAGGCACTTGGTGACATGGTGGAAAGTATAGCAGGAGCTATACTAATTGATACAAAGCTTAATCTTGATGAAGTATGGAGGGTTTTTGAACCAATATTGTCTCCAATTGTGACCCCTTCTACTCTTCAATTGCATCCACTACGTAAACTGTCTGAATTATGTGACTCACTTGGGTACTTTGTGAAAG
165	11781	a11781	2	50.194	Fvb2	15534854	AAxAB	1.64	1	57	-	140;G/A	AATTCCAAAATTTCATAAATGCATGTATGAAAGCAGCAAATTGAACAACCCCAATCCACCAAAAGCCCTCAAATTTGGCCTAAACATATCAAATCCAACAATCCCACATGCTCCAATTGTTAAAAAAATTAAAAAATCATGGACACATTGGGGCATTTGACTCAATTGAATTTGAATTTCATAAAATCAAACCTGTAACAGATTGGCAATGGTCTCGACAGTAGCAGTCTTGTTCATCCC
166	12803	b12803	2	51.02	Fvb2	21831519	AAxAB	12.25	1	1	***	9;T/C	AATTCTATGTATTGTTATTGTTTTGTGTCAAACGAAGCCATGCAGTGATAGATTGAAGATGGTAAAAGCTTATTTCACAACAGTGTACAAAATTACAACTGTGAATGTAAATATACAACAAGGTAACACTGGTGATAAGAATCTGTTTCGGGAACTCGGTAAAATGGAGGACAATAACTCCTGCCGTTGTCTAATGAAAAAACTGGCATGGTTTTGCTGAAACTGAAAGCATCATCTCTC
167	40606	a40606	2	51.713	Fvb2	15966858	AAxAB	1.15	1	40	-	229;G/T	AATTCGAAACTAAAACAAGCTGCATCATCCTCCACTGATGCTGCTTCAAATATTCAATTATAAATAAAAGACTGAGAAGGTAGATTGGTAGCCATCAATTGTAAACCAGCAAACCCTAAATCATTTCCTTCTATCTAGCCGCAGCCCATACTTGTTGAGAGTCTTGATATAGCTTCACATCAATTGGATTTGTTTTCCTTTGTAGTCTTTTGTTTCGGTAAGGAAATTCGGTTTCCCATT
168	13919	a13919	2	51.978	Fvb2	15777301	AAxAB	4.3	1	22	*	37;T/G	AATTCCAGTTACGCATATCTGACATTGCCCCTAAACATCCAAAAAGAAACTAAATGTAAGATCCAAGTAGTGGCCACTTTAGTCCAACATACATAATCCAAATGTCTACTTACTTTCCATTGATGTGACATCAGTTCTTCTTTTCTTTACATACAACATTACAGAAATGGAGGCAAGTATCAGCAAGGCGAGCAAGGCTCCTCCAATTGCCCCAAGTATAACTGCAACACTATTGTGCTT
169	5392	a5392	2	56.649	Fvb2	17732659	AAxAB	6.34	1	3	*	32;A/T	AATTCTACATGATTCGTTTCTTGAAATTCCAAATTGGATTCAACATGACTTTGTTTCAAGTCTTTTGAATGAGAATATTGGCTTTCCTTGCAAAGTGAAATGTGTAAATACCAAGCTCATAATGGAAGCAAGGAATCCATAAGCATGACTTAGAAGGAAAAAACTCCTACAGGGGGCAGTATTCCTTCAAACTTGAAGAAAGACTCAGACGGCAAATCTTTCAGACTACTATGGAGCCAG
170	44007	a44007	2	56.889	Fvb2	19089347	ABxAC	11.41	3	9	**	175;T/G_199;A/G	AATTCCAATCACCACCACTGATACATAAACAGCCTATTAGTGCTCAGCATGTATACTGTGCTATTGCTAACAATAAGCAAAGAGAAAATGTCAATGATAATGCCATATGTGCTAAAGCTTGAAGCTTAAAGAATATGAGAAAACACACATCTGAAGACCAATCCAAACTCAAATTTGATGTGACAAAGAAGCAAATGATAATCTACCGAAGAGACTAAGTAGCTTAAATAATAGGGCAAA
171	12806	d12806	2	57.483	Fvb2	19270629	AAxAB	5.32	1	8	*	16;T/G_84;G/A_186;A/T	AATTCTAATGGATATCTATTTTTTCTGTTATGATATTGTGGACTTGGCTAAATATTATATGCAAGCATATAGTTTATACTGCTAGCTTTTAAATATTCTTCGATGCGACCATATATGTATGCATAACCTAAAAGAAACGGCGCAATTTCATTACTGCATTACATGTATGCAGATTTCAAGTATGATAGAAACGAGAACAATCTGGTGAGAGTGGTGCATAAAGGATTCAGCTCATGCAAC
172	39308	a39308	2	58.766	Fvb2	19725847	ABxAC	9.73	3	14	*	163;A/C	AATTCTCTTGCTTTGCTATAAGCAGCACATTTAATTGTATCAATGGAGGATCGTGGAATGTTAAGCTTGTGCTGCTGGTTCCATTCATTGCAGCCTCGACGAAGTAGATAAAGCTCCAACTCATCATCATTGCTAGTGCTACGGCTGAGGACACAAACTGTGCAATCAGCAGAAGTGGGAGGAGATGAAAATGCTGCAACATGGTTAGTGAGTTCAGAGTTTGGGAACTTGGGAAGGTCT
173	36433	d36433	2	59.053	Fvb2	20299409	AAxAB	3.12	1	63	-	124;C/G_217;C/T	AATTCTGGGGTCAAAACCTGTTCCATGGTCATTAAGGTGGCAAGAGCAAGAGTCCACTGCTGGATGATAGATTCGATGAACTCCCTTACAGTGCTTACTTGGAGGGACTGGTTGTCGAGGGAAGCGAGCAGCACGGCGTACTTCCTGAGGGCGTCCACATCGTCGGCGCGAGGGCCGATTGTGAAGTTGGTTGTAATGGTGAATGGATGGTTCTCGATGCTCAAGGCATGGACTTGGAAG
174	14621	d14621	2	59.359	Fvb2	20122095	ABxAC	14.31	3	15	***	133;G/A_146;G/C_213;A/G	AATTCATGACACATCTACCTAACTCGAGAATACTCGATGAAATGGTCACAGGATTTTGTGATATTACTTTGCCTCTGCATAGACAATAGTCAAGCACATGCAGTCACCTGTGATTGCTACAGATCTAATAAAAGCCATTCTGAATGGTCCAAAGTTGATCCTGATTGATAACATACACAATTATTAAAGATTTAACCAAATCAATTTATGGTTAGGCATAAAGTAGCGTCATAGTATTGG
175	33006	b33006	2	59.878	Fvb2	20404500	ABxAB	0.48	2	6	-	62;T/C	AATTCATGTACAACAAGTTAAACAACAAAACAAATAACCCTATGTACCATACACTAAGCAATCACCACCCATCTTGATCATACTAATTATGCTTTTAATGTAATGGACCAAGAAGTACTTGAAGAAGCACAATGTCAGTGATTGGCTTCCGATGATTGTATTCAACCATAATGTGCACGAATAGACCTACTTCGACATTGCTGGAGGAAGACTGAGAAATCAACCTCCTCTTGGGCAACT
176	29020	c29020	2	61.027	Fvb2	20378293	ABxAC	11.79	3	33	**	209;G/A	AATTCACCATGCTTGAGCTCGCTAAGGTAATTTACATTGTGAACTCTCTAATCTTAGCTTAATTTTTGAGGTTTGGCATTTGGTTGATCCTATACGGTGGTGAATAATGTTGGTGCAGGTGGTCCAAGAAACAATTGACAAAGATGCAAAGATTGAGTTCAGGCCAAATACTGAGGATGACCCACACAAGAGGAAGCCTGATATCACAAGGGCCAAAGACCTTCTGGGCTGGCAACCAAA
177	38859	d38859	2	61.423	Fvb2	20883155	AAxAB	5.88	1	2	*	185;A/T_206;C/G	AATTCGTTGTTAAATGCATATTCTTAAGAATAAACTTCTGCGTCCCTTAATTAAGGATTTAAGGATGGATTACACATGGAGGAGATGGATATGTGTCAACAACCAACAGCCTGTTCATTGTTTCCAAGTCTGGATTAACTGGGAAACTTGCAACTGAACACTTATATCGATATAGAATTTGAGATACACACAGAATATGATCTGAGCTTGAATTAATTTATTGGGGTTGTTCTGCATATA
178	18688	b18688	2	61.553	Fvb2	21064375	AAxAB	6.05	1	6	*	222;G/C	AATTCACAATTGTGTTTTATTGCTAGTTTGATGAAGTAACTGAATGGATAATTTTCAATTTTCAGGGTTGGATATTAGTACATTGTGTTTGGGAGTATCGAGTTGTTCAAAGATGGTTCCTACCTATGTTGTTGGTGCACTTGTTCCGCTTGTGATAACGCTTCTGCTTCAGAAGTCAAAAAAGGAGAAGAAACGGGGTTTGCTCGTTGATGTTGGTGGGGAGCCTGGCTATGCAATCCG
179	40296	a40296	2	61.944	Fvb2	21959089	AAxAB	39.6	1	35	***	46;C/T	AATTCATGTTTTTGATCAAGAACAAATTTACAGGATATATCTTATTCGCGGCATAGCTCCTAATAGCAATAAAGATGAGGTGTACTTGGTGGAGTCTGGTGGAGATCTCTTGCTTGTAAGAAGACAACCTAACGACTTGCTTCAAACAGCTGGGTTTGATGTTTTTAAACTAACTACAGAAGAGTACGAGTGTTGGTACTTAAACGCAGTGAAGTTGCAAAGCTTGGGAAATCATCAAGC
180	17812	a17812	2	62.078	Fvb2	21958424	AAxAB	1.5	1	49	-	38;A/T	AATTCCCAAAGAAAGAAACACAAGATGAAGGAAAATAGACAAAATACCATCAATCTTATATATATGCACACAAAATAAGGAACATGAAAACAATGACAATTGTTAGCAACAATGCCCAAAACGAAACTAGGAACTTACAAACAGAAACTAGAGATTGAAATTTAGTCCACTTTTAGCTTGCGCTTTGGATACACTGTTGTATCCTTAACTGTTGGGAAAAACCAGAATGATTCTGCTGAA
181	26370	a26370	2	63.225	Fvb2	21374268	AAxAB	7.11	1	1	**	76;A/G	AATTCATATGCCATTTACATTCAGTAGAAACCTAAGCTGAAACACACAGTACCAATCAAATTGCTCACGCATACACATAACACCCAATCAAATTGATCCAAATTACACACCTTTTCTCGTACAAAATAGCGGAGACGAGGCTAGCGAAAGTCTCAGGCTTCATATCCCTCTCTTCCCTCAGCTGGTACAGCTTGTGCTTAAACATAAGCCTCTGAAACCTTCACCAAAATCACCCAACCA
182	18337	c18337	2	66.064	Fvb2	23910171	AAxAB	5.14	1	33	*	80;G/T	AATTCTGAAGCAAGCTGGGTCGTCCAACGTACTGATCGATGGAGGTAGCTAAGGTTGACCGTTGATGGAAGATCGGAGGTGTGGGGCTGGTCGGCTGGAGGACTAGGAGGTTGGCACTGTCGCTGAGCCTGTACAACCATTATGTCGTTTTGGCAATACATGCACGTAAGGCCTAACTGGAGATAGACGTATATGTTCTATCTATAGGTCTGCGATCCAATTCCGTTATCTATCATCAAT
183	21131	d21131	2	66.48	Fvb2	23927945	ABxAB	1.35	2	2	-	22;C/T_134;A/G	AATTCATATAGTCTAGCTTTCCTCTTTGGTTTGGGAAAGCTAAAGCTACTTAAATTTTAGTGTTCAGAAATGTAATTGCTTCAGAAAAGGTCTGATTATTGATTTTCTAAGCAGATATGGGTCAAGACTGCTGAAGTTTTGGCGCGCGATCGCCTTCTTGGTTCATTTTCTGTGAGTGATTCATGGATAATTGGATATTGAACAGATTATGCAACTGCATTAGCATTTCTTGAAAGACAA
184	19934	b19934	2	66.913	Fvb3	32796315	AAxAB	11.23	1	48	***	159;A/G_166;T/C_216;T/C_223;G/A	AATTCACCTCGAATGAGTTTAACAATTTTTGTAAGGCTCATGGTATTAAGAGGCAGCTTACAGCAGCGTACACTCCTCAGCAGAATGGGGTTGCAGAACGTAAGAATCGAACTATCATGAATATGGTTTGATGCTTACTTACAGAGAAGCAAATGCCTAAGGTGTTTTGGCCAGAAGCTGTTCGGTGGACAGTACATGTGCTAAACAGAAGCCCTATTGTGGTGGTAAAAGACAAGACTC
185	6395	c6395	2	67.654	Fvb2	24406618	ABxAC	16.88	3	6	***	28;A/C	AATTCTGTACTTAAGTTATGACTTTTATAGTCCCATTGCCAATTTGATTTTGATATCTTGAATATCAGGGTGTTGGAGTTTTTCTTAATGGGATGTTCGGTTCTCTAACTGGCACTACTGCATCAGTGTAAGGAAATCAGAACTCATGATATTTGTGCTCAAAATATTGTATTTATGTCTGACCTCTACCAAACATTATGTTTTTATGTACATGTAAAATGCAGCTAGTTTATTTTTAAC
186	15924	b15924	2	68.574	Fvb2	23801344	AAxAB	3.5	1	42	-	151;C/G	AATTCGACAGGAACAGCTGGGGATGGAGTTGGTTAGAGCGCTGGATGTCAGCTAAGCCATGGGAGACTAGGTTGATGGAACAATCCAACAGTGATCCATCTGAGTTCACACCGCCTCCAAAGAAAATTGCAGACCCTTTTGTTGGCATCGGCAAACATTCGAAATCTTCAGAGCCACCATGCTCAGTCAAAGTGAGAAGGAACAATGTCACCACTAGGATATCGGCAAAGCCACCACACC
187	36143	b36143	2	70.009	Fvb2	24959007	AAxAB	4.7	1	12	*	7;G/T	AATTCTTGCAAGTTTAAACTCAAAAAGCTCAAATAAATAAGCAACTGAGACATACTCACCATTTTCTGGCGCTGATTTAAAGCCTGCAGCTTATGCCTTTCATATTCATTTTTCCTGCCCTCTTTCCGTAACTATTATTTCAAAGTGAAATCAAAGAAGGGAGTGAATTAATACAGACAGAGATTTCAGCCGAAAAATTATTAGACTAAATATATTTCATATGTATAGTTCCATGAGACA
188	12968	b12968	2	70.287	Fvb2	23507708	ABxAB	0.57	2	2	-	191;T/G	AATTCCAACAATTCATTTGTGAAAAAGCTGCTTGCTGATAACAATGAGTATCTGAAAGCAGCCACCAAGGCTACAAAGTGTCATAAGCTCAAAAACAAGGTCTGGGAGCTTTCAGTCTTGTGCGATGTTATTGTCTCCTTGATTGTTATTGGACCTGATGGAAAAGTATCGAAGGAAAACCTAGACGAGGTGAAATCAATTCTAAGGGAGTACTGGCTAAAAAAGCGACTCGACCGCTCA
189	18782	a18782	2	80.675	Fvb2	26671705	AAxAB	4.74	1	52	*	139;G/T	AATTCTTTGGAAGCGCTAGCCTTAGGGTTTGGTGTTATGATGAGGATATTCGAAGTTGGCAACAAATTGCAGCAATGCCACCATCAATGACACATGAATGGTATGGCAAGAATGTGGATATCAACTGTGTTGGGGCAGGGGACCAAATATTGATATGCTTAAGTTCTGCTGAGATTTCTAGCTGTGTTATGTGTGAGTTGGCTGCTAATGAATGGGTTGAATTGCCCAAATGCTTTGTGG
190	43695	c43695	2	83.778	Fvb2	27627958	ABxAB	4.66	2	4	-	161;C/T_203;C/G	AATTCCTCAAACCCAACTTCAACCGCCTATTATCAATTCCTTATTGCCCCAGCAACCAAGCTGAAAACAAATTTAGAATTACATGAACACCTATGTGCCCTTCTCCTCCTACCTGTCTGTACCCTCTACCCAGTTTAAAACTGCTCCCAAGTCTACTTGATCGTAATGTAGCGATTTGTTCCATGCTTGGCCCAGTTGTCCTTCAGATCAACTGGGTTCGACAGATCATGGCCTTCAGCT
191	13913	d13913	2	84.194	Fvb2	27622705	ABxAC	7.28	3	1	-	150;A/G_152;G/A	AATTCTCAGAGACTATCTTGGTATATGGATTATCTATTTTTGTTCTCCTACTTGTTTTGAAAGAGTATAGAAGTTTCTACAGTCTTTTTTTCTCTTTCTATTGGGCCAAAAAAAGTCCTAGTCAGTGAAGTCCTAGTCCTAGTCTACTGGATATGAAGACTTTAAGTTTATCAGTTGGGGACCAAAAGCCTACTCAATTAATTCAAATCAGTACATGTTGAAATAATGAAAAGAAACAGA
192	36887	b36887	2	84.86	Fvb2	27959937	ABxAB	2.06	2	17	-	233;C/A	AATTCAACTGTGTAGAGTTCACAACCTCCACTTCAGTAAGTCGTTATGTTTGAAATGCTTCATGCTTGTTCTCATTAGGCCTATCCAGTGATAAGGTATTAAGCTCGAGTCAAGTATCATATTCTAACGTGCACGGTGCCCCATGGTGATATAATAGCCCATTTTCGATAGTTGTTTTCGACTTTTCGGGTCCAACCCAGTACCTCCTCTTCCGAGGTCGCAATATTTGATATCAAATAT
193	39217	c39217	2	84.915	Fvb2	28059520	AAxAB	1.83	1	22	-	229;T/G	AATTCATTCGTAAGAAACTGAATCAAGTGGCAAAAATGAAGTTTTGATGGTCTAATGTCATTGCATATGATGATCTTCCCGAGCAAGTAATCTAGCATAACTTACTTCAAAACTTTACTTAAACTAATACTTCTTATTTCCCTCTATTTCAGCTTGTAAAAAGGATGTGGAAAACGTTTGAGATATGGATCACACATGCAAAACTCATATGACAGGGATTTAGAGACTATAAGTATGTTA
194	43269	c43269	2	85.511	Fvb2	28580973	ABxAB	5.9	2	2	*	127;C/T	AATTCTAATCTGAAGCTAGACGGGTTCTTAAAAAGTTCTGCACATCTACTCGAGGGAAGTAGCAATGCGTGTCAAACTGTAACTAGCAAGCATTTTCCCTTTAACTCTTAACACTATTGGTACAGAACTAGGAGTCTGTCTTTGCAAATAGACTCAAATCGTATCTGTATTGTAAGTACAAAATCAAATAAAGGAACAAAAACTACTCCTGATGACTGATTTTAGACTTGTAGAAAATGC
195	36800	c36800	2	89.447	Fvb2	27269465	ABxAB	38.16	2	38	***	36;C/T	AATTCTGCATTGTATCATTCATTTGGGATATGAGTACTAAGAGCTAAACATGGTTTCTTGCTGTATCCAGATATGAGCTTTCTCATGTTTGATTTGAATATTCTAGGAAGGAAATCTGGTATTGACGAACATGGTGGTGGTTTCTTATACAGAAATTGTGAAAGCATTACTGTCCACATGTACAATGATCTTATTAGGGCATCCCCAGAAGCTGCCTATTCTTGTACGTACAATATACAT
196	9296	b9296	2	0	Fvb2	10050598	AAxAB	0.18	1	4	-	74;A/G	AATTCTGAATTATTATTATTTATTGGATTTCAGCATTCTTCGATGATTATGGAGGCTAACTAAGGTTATCTGTTGAATAATCTTGACATATATTGAAAGTTGTCATGTGCTTTTTTGATCCAATAATAGCTCAAATAAAATGCAGAACATGTCCTTTAAAAAATAGTGGCTTTAAATAATTTATATTCATAATATTTGGTTAAAAACTTAAATAAACTAGACTAATTCTCTAATTTCTCT
197	1868	b1868	2	0.788	NA	NA	AAxAB	0.11	1	3	-	142;A/T	AATTCAACAGTCAATAACAAGATTTGGATCCCGATAGAAGATAATAGGAGGAACTTGGTAACTGTGACTTGACAATTTCATTATAAATTCAATCACCCACCTGCATGATTACCTATGAGTTTTGTCTAGCAATTTTAATCGCTATACCAGTTTGTTACGTGGTTTAGATGGGACTTGACTAACTTACATAAAGAAATAAGCTTTGTTCTGTGTTTGGCAGAGCTCTGGAGTCATTTAAAT
198	29641	d29641	2	2.685	Fvb2	7305822	AAxAB	0.06	1	2	-	55;A/G_109;G/T	AATTCATCATTCACCGTCACATTGAGTATCAAATAATGTATTCATTGTACTATCGATCAGGGTCACTATCTATATTTACATCATCACCATTCATTATAAATGTAGGTGTGAAGCTCAAAATGTGGTCTATATAATATGACTATGTACTGAGGGTTTTAAGTTTGATGGCTTACTGCATTTTTAGGAGTTTATTCTGATGTCATTCTATGATATGAACCGTTCGTATTAGTGGAATTGGAA
199	11906	b11906	2	6.381	Fvb2	1855999	AAxAB	0.11	1	1	-	214;C/A	AATTCATGATGTCATGCAATTGAGTATGTTAAAAACAGGTTGAAACTCTGAGATGGATAAATGGCAAGATTAAGTTATTGAATACACAATCCCTTAACATTTGTAGTAAAAACCACCAACTAAAGTGGAAAGTCCACTTAGCCTTGTAGAATCCAGCAGATTTGCTTTGCAAAATCAAGTGGTGGAAAAAGAGGCTAATCTGAAATCAAAGTATCAAACACCAAAGTGATATGCAAGAAC
200	29738	b29738	2	10.712	Fvb2	1847152	AAxAB	0.16	1	47	-	88;C/A	AATTCCAGCAATCTCACAAAAACATACAATTTGCGTAGACCTTTATCTACAAAATGCATGCATTTAGACTCCTATTTCTTCTAACAAAACAAAACTGAGCTCAACATAGTAACTAAAAACTCACATTCAGACCAGCCAAAAATGACATCAAGACTAGTTTGTGCGAGTTTCAGATTTACATCGACCTTGACACCTTGTTCAACTTCTCGGAATTTTCAGCCTTGGATTCATTAATCAGGA
201	9593	b9593	2	10.723	NA	NA	AAxAB	3.8	1	50	-	219;G/T	AATTCATGATCTTTGTGCAAGGAAGACACATAGAGATCGGAAATGGTGAAGGAGAGAAGTTTACGGATTGTTGAACTTGAGAAGTTTAAGCCTTGTAAATACTCAACACATCAATATTCAAGCATTAAGAAATTCATTGTTTAGTGGGATTATGACACTGCCATTCCATAAAACAAAAACAAAAACAAAAACAAAAAACAAAAAACAAAAAAGGGTCGTTTTTTACTTCGAAAAAGAAGT
202	41725	b41725	2	12.826	Fvb2	6305030	ABxAC	16.23	3	26	***	146;T/A	AATTCTCATTTGGCCATCTTCTTCTTCCTTTTGATGCAGCTTTGGGGTGTTGGGTTCTTTTGTTAATTGCAGGCTGCAGATTCTTACTGGGGTTTTAACCCTTTGTTTGTTTTCTATCGATCACTCTCTCCCTCTTATCCTGCGTTTGTTTACATCTTTTGCTCAGACTTTTTCCTTTGGGAATATGCTTTTTCCGAATGATGATAAGGATTCCTTCTGTTACTTAGGGTGGGGACCAAC
203	39942	b39942	2	14.508	Fvb2	3895014	AAxAB	1.72	1	31	-	33;G/A_95;C/T	AATTCTTTTTTATTTTTGCCTTTCCAAATGAAGAGAATTAAATCCATGCGTGGATTTAAATTTGGATATTGGCCACTGTTCAAAGTTTTGGACTCTTAAGTTTCATTAAATCTTTAGCCATCACATGATTACCTTTTAATAACTAACAGAAAAAAAAGCCCGTCTAATGTTTAATCATCTTTAATCACGCGGCAGTGTTTTGTTTACTCAGCTTTTTTCTTCTGATGAATAAGATGAGTT
204	15650	c15650	2	17.571	Fvb2	13393619	ABxAB	3.49	2	30	-	151;C/T	AATTCAATCTCCTGTATATTATCAAATAGTAAACTTAGTAGGTTTCCTGTTGTCCTAATAGTAGGTTAGTCCTGACCTGTTTTATATCAATTGGAATTGTAGAAAAATGTGTGATTGATGCCCAGATATTGTATCGTAGTAGTCAGTGCAACTTCTATCAGCTTATCTGTAATGCAACAGCTCACTTCATTCATTGAAGTTTAGCAATAGGATCTGAATGCCTCATTATCTTCTCAAGTC
205	30035	c30035	2	18.708	Fvb2	13514654	ABxAB	11.11	2	15	***	49;C/T	AATTCCCCGTCTATTTTTCACATATCATGTACAGTGTAACACCCTCATACCTATGTCTTTTCTAGTTCATATTTGATAATCAATTTTTTTAACAATCGACCATTGCTTTTGTTTCTTTGGTTTCTCTTTCTTAATATTACCATGTTACGGTATCGGTCTGGCTGAGCATTGTAACTTTGCAATTATCCTGCGGCTTCACAACGATAGAAACTGTCATGAGTTTTTGTTTCACCAAAATCC
206	40852	b40852	2	19.008	Fvb2	13689740	AAxAB	2.67	1	49	-	122;A/T_140;G/A	AATTCCAGTAAAAAAAAATCACAGAATAGATACATTTATTGGCAGGTGATCTGATCATCATGCAAAATCCCTCATAAGTTTTGGTAAGGATACCTATTTCAATCCTTGTACTGTTTTGTGTGACATGATGCAAAAGAAATGCAAGTGTCTTAAACAAGTAAATCAAAAAAGTTAATAACAGATTATAGAACACTTACCGATAGAAGGTCAGCTCCAGCTTCTACCAACCCAACTGTAGCC
207	6511	a6511	2	19.867	Fvb2	4516110	ABxAC	7.82	3	9	*	93;T/A_215;G/A	AATTCATGGATGTCAGTACCACAAAAGGACGATGGGGTCATATATAGTTTATTACGCTCCTCTGTTGTCCTTATTTATTTTACTTTAAGATGCTCTTACATAGATGGACAAGACTCACGTTCTCATTACTTTCAGTAGTCGGTACAAGCAATTCGGACGGTAATTTCTCAACAGAAATAAAAATAAAAGAAAAAAACAGGACAGGCACTGCTCTCGTAAATTCATTATCTATTTGTTACT
208	43403	a43403	2	21.054	Fvb2	9257061	AAxAB	2.52	1	2	-	70;G/C	AATTCTTGAAAAAATTTCTGCTATGAAGCTAGGAGAAAATTATTGCCTTTGAGAAAGGTCACAATCCACAGCAAACTTCCAAACTCATTGGGCGACTGGATCGACGAGTGACTTTCTTTTCAGGTAGCAAGTACTGATTTACATGCATATTTGAGTTGTGGTTCCAGTGAACTTTGTCCCTCAATACTGATAGAATGCATGCCCCCAGTCCCTATACACTTAAAGTCTGAAATTGCAGAG
209	12153	a12153	2	21.141	Fvb2	3227362	AAxAB	2.25	1	1	-	66;C/G	AATTCACGAGTAATTGGGATTTTCGAATTTGAATCTGGGGATAGGAATGTACAATTTCAGCCAAACCCACCGATAAAAATTTGAAAATCTATGGGTTTAATTGGACATATTGGTGGGATTTATAATATAAAGAAGATTCACAGCAAAAGTTAAACTACTCTATGGTTGTTTTGGTCTGCCAAATTGAATCTTTATCATCTATATATCTTCATCATGTCTTATCATTGCAGTTTGCTTCTT
210	18238	d18238	2	21.968	Fvb2	14553385	AAxAB	14.72	1	52	***	78;A/T_93;T/A_168;G/T	AATTCGACAGAACCCTCGACTATTATTAATGACACTATCTTATAACTAACAATTTGTACTAGGGAAGAGGATTTGATAACAAAAATTTGGGAATGAAGATCAACAAATTTGAAACTTCAACAAGGACAGAAAGAGGGAGTAGTTTTTTAAGGGTACCTGAAGTTTCTCGCAGAGTTCTACAGAGCTCCAAGATGACTCATCCAATGGGATATTGGGGTCAAAATCATCACCAGCTCTCAC
211	6285	a6285	2	24.327	NA	NA	AAxAB	2	1	17	-	12;G/T_140;A/T_151;G/A	AATTCCTTTTTAGTGTTTAAATAAATATACCCTCGATGTTAATGGTTCCTAATGGTGGGTCTAATGGCACTGAGTTAAGTGAGAGACAAAATCAAAAGCGAGTAAGTTAATGATATTTTTAAAATGTAAATGAGTAAAATAATTAATTAATGAAAAATCAGTGACCATTTGTGATATTTTACCTAAATCTTAAAGACCTATGTTAAGAAAGGCAAATCGTGGGATTAGTTGTTAATTCCA
212	9680	a9680	2	24.346	Fvb2	14845607	AAxAB	0.12	1	7	-	141;C/G	AATTCTCGTAGAATTGGAAACAGTACAAGTATCATAATTGGATTACCACATTACGGTAACCAACTTTTTAGGATGTTAGGCTTGGTGCTGCTAAGAAGTGGGCAGCAACTATATATATAGGGACATGTGGGAGGAAATGGCCATGAGATCTAATGGTTGGGTTGTCTGCCAGAATTGCTATTAACTGATACAAAAAATGTACTAGAACTGTGAGAAAGTGTAGAGGTGCTAAAGTGGTTT
213	1366	b1366	2	24.663	Fvb2	15985114	AAxAB	3.59	1	22	-	203;A/T	AATTCTGTCTTCCTCTTTTTTTTTTGTTCCGAATAGTTTAGAACTCTTATCTATGCTTGCTACAAATGTATTATGTAATTCAAAAGCTAGAACGTCAATGGTTTTTTAATTAGTAATATAGTGATTGTGGAATATTTCTTGTATTGAAAAACTAGATGCAATAAGTATCAACCTCCAAGCAACCAAGAAGCTCGAATTGGAAAAATTGAGGCAAATGGTCATAATCAGCATGGCTGGTGG
214	4903	b4903	2	24.798	Fvb2	18053606	AAxAB	8.33	1	44	***	116;C/T	AATTCAAGCATACAAAAATGACATTCAGCACAATATGGTTTGGCCAGACAGATTCATAGCATGCCTCACAAAGCTTTCAGAATGGAGGCTTAAGACTTCTATAAAGTAACACAATTTTTTTCAGATGCAGATAAGGTGTTGTCCAGCTCTATTAGGAAATCTCTGCTGGCATCTATAAATGAAGAGAGTAACTTACACAAATTTCTTCATTGCAGAAAACATTTTGAAGTCTCAGGCATC
215	701	b701	2	26.32	Fvb2	15966858	AAxAB	15.21	1	29	***	129;C/G_204;T/C	AATTCGAAACTAAAACAAGCTGCATCATCCTCCACTGATGCTGCTTCAAATATTCAATTATAGATAAAAGCCATCAATTGTAAACCAGCAAACCCTAAATCATTTCCTTCTATCTCGCCGCAGCTCATAGTTGCTGAGTGTCTTGATATAGCTTCTCATGAGACTGAACCTTTGTTCTTTATTGGATTTGTTTTCCTTTATAGTCTTTTGTTTCAGTAAGGAAATTCTGTTTCCCATTCC
216	15923	b15923	2	29.842	Fvb2	19730196	AAxAB	0.54	1	27	-	49;G/A	AATTCACATTGATACAAGGCAGTATACATATATACAAGGCAAAGTCCTTGCCTACAAGGTAATCTCCTACAATCAAACTAGAATCAGGAATACAGTAGGAAATAGATAACTACAGATTATACATTCCTGATACAATTGATACTCAAGATCACTTTCCTAACAGCTTCTATGCCAAACCACATTTCCTTGGTACATGATGTTGTCCACAAAGCCATCGTACCTAGACTGGTTGTTACAAGT
217	14440	b14440	2	34.661	Fvb2	22129776	AAxAB	0.04	1	45	-	29;G/A	AATTCAGATCCTGCCTGTTATTTTTCACAGCTTTCTCGAACTGTTCTTGCTCTGTTGAAACTGCATGGAGGTTAATCTCCTAGTTCATAATTAAGGCACTTTACAGTTCAAGAAAGCTGTGGAAAATCACAAGGAGGATCATATATAATACCCAAACTTGAATAATCTCCTCTTATATCTAGAAGAACAAGGATCTGATGTTTTCTGCTGAATTTGAGAGAGAAAATGAAGGAATAATTA
218	21325	d21325	2	36.258	Fvb3	16802167	ABxAC	4.98	3	56	-	131;C/G_153;T/C	AATTCTCAAAATATCTTCCTTTTAGAAAATGGCACCAAAGAGAGTTAGGGTTCTTAACAAGTCTCCAGCATTGCTTTGCTAGGAGAGCCTTGTTGAAAACAGCCAAGTCTTTGAAACCAATACCCCCAGCACATTTGCTCTTCCAAAAATAATTCCAGGACTTGAAGTGAATTATCAGTTTGGAGGCTGAATACCCCCACCAAAAGTTAGCTATGTCCGAGTTGATAGCCTTGCACAAAG
219	28675	b28675	2	37.89	Fvb2	20023079	ABxAC	5.15	3	41	-	107;G/A	AATTCCTTCTGGAAGAAATGACCGAGTAGATGCAGGTTCAACAAGGGGAAAGTCACTGCCCTTGCCACCCTCTGGAGGAGCTCAACCAGAAAGGACTCGTTGTCCCCGACCAGTCTCTGGTTCTCACAAAGGTAATGGAGCAGATATATTACAAGTAGATGGCTCTGAAGGTAATGATTCAGTCAAGGTGCAAATGCGGAACAGAAAAGCTGATACTCAGAATGGAACTCAGCATATTAG
220	36791	d36791	2	38.583	Fvb2	21831519	AAxAB	0.34	1	39	-	98;A/G_147;C/T_231;G/T	AATTCTATATATTGTTATTTGTTTTGTGTCAAACGAAGCCATGCAGTGATAGATTGAAGATGGTAAAAGCTTATTTCACAACAATGTACAAAATTACAACTGTGAATGTAAATATACAACAAGGTAACACAAGCGATAAGAATCTGTTTCGAGAACTCGGTAAAATGGAGGACAATAACTCCTGCCGTTGCCTAAATAAAAACTGGCATGGTTTTGCTGAAACTGAAAGCATCATCTCTC
221	39086	d39086	2	39.417	Fvb2	21988681	ABxAC	16.85	3	41	***	180;A/T_194;G/A	AATTCCAAAACCAATACCTCCTGCTGAAGCCACTAACTGATTGACACTAGGCGGGATAGGCGTCCATGTTGACAAAGGAGGTTGAATTGGTATAGGTGCAGTGGAGGGCTGAAAGGACTGGCAGGAAATGTAAAACAATAAGCAACATTGATTGAACATGTAAAACATTCTTAACCAATTAAGCATCAAGTCATGAGTGTACCCCATTGACACCGACAGAATTGAAGCCATCAGCTCTCT
222	37566	d37566	2	41.787	Fvb2	21037391	ABxAC	7.88	3	36	*	91;T/C_115;C/T	AATTCGATCTGTTATGTGATTATTGTTCTATGACAATTGACAAAATGATGTTGTTTGATTTGTACGCTTACTTTGATGGTAAAAAAATGAATGTGCGTCAAGCAAGCTGTAAATTCAAACGTTCTTACTTTTACATAAGACATGTATGTAGTAACAATGGATCATACTCTCAATTAGCTAGCGTACCCTTGTTTTCAGGCTTTCAATGTAGTTTTTATCACTCTTTCGAATCAACCGTAT
223	36874	a36874	2	46.793	Fvb2	23272653	AAxAB	4.06	1	3	*	138;A/G	AATTCAGTATGTGCAGGGTTTTGTCTAGGTGTAGAGGCTCTCCATTTAGCACAGAGGCCTTCCCACCAGTGTTAAAATGAGGGTGTTAACCCTTGCCAGTTTAAAATAAAAATTAATAAGAATATAAAAAATGAAAATAAAAATGTAAATTCTACATAAAATGATGAGGTTCATTGGCTTCTATTACATAAAGACAGCAGTATAATAAGCAGACGAATATAGTAGAAGTCAAAAACTCTA
224	41306	d41306	2	48.487	Fvb2	23456317	AAxAB	3.97	1	34	*	11;A/C_207;C/T_211;A/C	AATTCAGAAATAGATTTTGCTTGCATAAGCAAATAACTAAGATTATGTTTTAATATATAGTTGATGATGCTTACCACAAATGTAACTTGTTTCTTTCTCATTTGGACTAATTAAGGAGGAGGTACCACGAATAATAACAATAACAATTACCTGATAGCAAAAAGCTTGACGAAAGTGATTGGTCAAAAGAAGAACAAGAAGAAAGATCTAGCTAAATATAGCCCAATAATAGGTTAAGGC
225	8548	a8548	2	48.774	Fvb2	23790012	ABxAC	4.81	3	8	-	91;C/A	AATTCGACAAATTCGATTATGAAATTTATCCTGCCTGAAGTATGAACAACTCCTTATCCCATCTATCTCTCGAACAGCAAAAAAGAAAGGTCTTGCGAAGAAAGTTGAGGTCAAATTGCCTGAGAACACCCAGAAACGAGTCGGGCACGCTCACAAGCCGATCCTGCTCCTCGGTGATAACTAGATACATCCAAAGAAATCCAGCCAACCCCGCCAAACTAAGCAATCACACTCAAAACC
226	18072	d18072	2	49.633	Fvb2	23595560	ABxAC	7.26	3	8	-	144;T/A_234;A/G	AATTCCAGGAAGAAACTAGAAAAGCACACAAGAGAATAAAGTTTAGGTTATGGCTAGAAACAAAAGGAAAGGCCACATTCCGTACTGAAGGGTACACTCCCTATCTAGAATCCCAGAACATAATTTCATTAACAACCAATGATATTGGTTATCCTTACTATATTCAATAACTGAACATACTGGATATAGATGCATACCTGTCATTCTTATCAAATTGAAACCTAGCACCAAAGTAAAAAG
227	17434	d17434	2	50.553	Fvb2	23868862	ABxAC	2.3	3	8	-	12;C/T_17;G/A_37;T/C_155;A/T	AATTCTAAATTCCGCGTGTATTTTAGAATCAAATAGATGAATGAAATTTACGTGTCGAGTCTACAAAGATTTGCGAGTTTATCACTCTTTTAAAGATAAATAAAAAATAAAATCTATGGCACCCCTATCTTATAGTGATGAATACTTGCCTGTTAAATATGTTCCATTGCAATCGGTATCCTCAAGCACAGTTGATTTTAAGCAGAACCCTACAGACAACCACCATGCCATGATCCCACA
228	13556	b13556	2	51.548	Fvb2	23842956	ABxAB	1.93	2	3	-	113;A/G	AATTCAATCCAATCATCCCCAAATACCAAACCCATCACAATAACTTCCAAACCAATTGAAACACACAACAAAGCAACAATCTTGACAGAAACAGAAGTTACCTTGAGGGAAAAATTGAGAGCCACAGAAGGGTAATAACGAAGAACACTGCTCCCATTGCCTCTCCACAAAGACAAGATGCCTTCTTCTCTAACCGTGCGGGCTATGCAATCCAACATGCCTTTGAATCTGGTCCTTCCT
229	2027	b2027	2	52.753	Fvb2	23910171	AAxAB	17.6	1	35	***	118;T/G	AATTCTGAATTAGCAAGCTGGGTCGTCCAACGTACTGATCGATGGAGGTTGATCGTTGATGGAAGATCGGAGGTGTGGGGCTGGTCGGCTGGGGGACTAGGGGGTTGGCACTGTCGCTGAGCCTGTACAACCATTATGTCGTTTTGAAATACATGCACGTAAGGCCTAACTGGAGATAGACGTATATGTTCTATCTATAGGTCTGCGATCCAATTCCGTTATCTATCTATGATCTATTCA
230	3774	c3774	2	53.2	Fvb2	24094328	AAxAB	2.84	1	31	-	40;A/G	AATTCTAAAAGCCCAAAAGTGTTGAAGTCCAACTATAACTAAGAGGCCAGTAGAAGCTTTGACCTAAAATCGGAAAGAAATGGTGCTCCTGGCGCTACAGATAACGGCCGAGCTCGAAAACCTGACTGAGCTTCAGCCCCAAAACGGCTGCGACGATCCCGACTTCACCTATCTCTTCAAGGTATTATCATCCTCTTGCTTTTTTACCTCAGCTTTTTACTGTCTACTGATTCATGTAAC
231	22584	c22584	2	55.045	Fvb2	24756534	ABxAB	2.67	2	1	-	25;T/C	AATTCATCTAAACGTACCCCAAAGCTGTTCTAGTATATCTAGTATTACTATTATTATTACTACTTTGAATAAAATAACACTATTGAGGGAAATACATATATACATGTACTTACAGTTATAACACCTTTCATGGTTTCGTCAGTATAGAACTCAGGATCCTGCTGTTGTAAAGAGAGCATTATATCTATCAACGTAGGCTTTCCCTCAACACAAGCCCCATCACTCCTCATCTTCCTTTGC
232	21939	c21939	2	56.76	Fvb2	25268577	ABxAB	4.59	2	2	-	205;G/A_229;T/G	AATTCCATCGCCACAGAAGAGAAGATCAAATGCTTAGAGTAGTAGATACGGGAAAGAACCTGGGGTAAATTATGTTGTAATGTTAATTTGCATACAAATTGAATTTCATATATATAAAATTGTATATATGAAGATGTCTCAATGAGTTCGATACAATGAACTTTTTTAATAAATTACTGCATTCAAAAATGAGTTTTTATGGCGTGTATTTTGTGACTGTTAAATGTTATAGAAAATGCG
233	8202	b8202	2	59.415	Fvb2	25720623	AAxAB	15.04	1	49	***	82;A/G	AATTCACAGCATCCTCTTTTACAACAAACTGTGCACCTTTGTTGCCAATTGCAATGACATTACCTTGTTTTGCTGCTGATCGAATATCTTCAATTGAAACTAATCTTGAAACTTTGGGCTCAAAGAATTGCATTTTCCATATTCCATCTTCACTCTCCACAGTTTTCGTCTCCAAATCCTTTCGTCTCCGAATATATAAAATGATAAAACCAGCAATACCAAAAGCAGCTAAAGCAACGA
234	2704	b2704	2	60.604	Fvb2	25772605	AAxAB	2.37	1	50	-	135;A/C_160;G/T_181;T/G	AATTCTTCAATAACAATTTCTTTCTTGTTGTTTTTGGATGGAATCACCAACAAACTAAGCCTTATCTTATGCAACATCAATATATCATCATCTACTAGTATCAATGTATGCCCACAAACATGTACAAAAAATTTCAAGATTCAAAGACTCCATAAACTCAGAACAAGATCACCAAAACAAGTGATAAAGTCAATTCCAGCAATCACCATAGCTAAAAGATCAATACTTGTTACTGCTCAA
235	40324	b40324	2	61.04	Fvb2	26005246	AAxAB	3.25	1	34	-	18;T/C_19;T/G_34;T/C	AATTCGCTTCTTGATTTTTTCTCGCTCGATTGCCTTGAATACAATCAGAGTTGATTATCTCGTAATCGAGCTTTGAATTTGATCTTGTTTCGCGCGATATCTGTGTTGTTTTCAATCCGAGCTTGAATTTGTATGAACTTGATTGATTGAATAGGCTTCGAATTTGAAGTTGATTGTTGAGAATCTGAGCTTGTTGTGATTGCAGGCACCAGCAGTACATAGGGAAAGTGAAGGACGCGG
236	17873	b17873	2	64.552	Fvb2	27024678	AAxAB	12.89	1	50	***	153;A/G	AATTCTATTGGAATCGGCAACCAAGCTGCAACTAATGTTACCAGCAACATACAGTCGACTATGGTGAGCAATGCACTTTTCTCGATTACAAGTTTACAACCATACATGTGTAATAGGCCTGTACACTGTTTGTAAGTTCTCAGTCTGTACAATAGATAGCATAAGTTATAACTTCTCTTGGCCCTGCTACTTGAGTTCATTATTCTTTGACTTTGTTGTAATCTTGCAAAACCAACATGT
237	8776	a8776	2	67.76	Fvb2	27150393	AAxAB	15.71	1	38	***	103;A/G_135;A/G_145;G/T	AATTCTAATAGAATTATGCACACCACCTTAGATTCCTTAATCCTTTCCTAATAGGGTTTGGTAACCAGGATACTTCTTTAACTAGTCTTAATTGCGCGTCAAGATTAAAAATCATGAAAGCAAGACAAAGGCTGTAATTATTGAAGTGCGTAATCAACGATTTTCACATACCTTATATTGCTGGTGCTGACAATTTCATTCTGTTTCAGTTTCAAGTCTCTCACTGTGTGGTTAAACTAG
238	16706	d16706	2	69.241	Fvb2	27627958	ABxAC	4.05	3	16	-	28;A/G_179;T/G	AATTCCTCAAACCCAACTTCAACCGCCTGTTATCAATTCCTTATTGCCCCAGCAACCAAGCTGAAGACAAATTTAGAATTACATGAACACCTATGTGCCCTTCTCTCCTCCTACCTGTCTACCCTCTACCCAGTTTAAAACTGCTCCCAAGTCTACTTGATCGTAATGTAGCGATTTGTTCCATGCTTGGCCCAGTTGTCCTTGAGATCAACTGGGTTCGACAGATCATGGCCTTCAGCT
239	13920	a13920	2	74.531	Fvb2	27959937	AAxAB	3.05	1	61	-	218;C/T	AATTCAACTGTGTAGAGTTCACCACCTCCACTTCAGTAAGTCGTTATGTTTGAAATGCTTCATGCTTGTTCTCATTAGGCCTATCCAGTGATAAGGTATTAAGCTCGAGTCAAGTATCATATCATAACGTGCACGGTGCCCCATGGTGATATAATAGCCCCTTTTCAATAGTTGTTTTCGACTTTTCGGGTCCAACACAGTACGTCCTATTCGGAGGTCGCAATATTTGATATCAAATAT
240	12199	b12199	2	0	Fvb2	8773190	ABxAB	54.85	2	3	***	239;G/C	AATTCCAAGCCCTAGAAAATGGCAAGTCGTCCAAGTCTTCTCCTCCTCAGTCCGCGTCTTCACACCCGCGAAACAAAGGCTCGCATTTCTCCTCTTTTGTCTCATTCTCTTGGACGAACCTCAGCAACTGGGAGGTATTCCTCTGTTGGGTTCGCGACAAGTTCAAGTCTTTGTTCTTGGTTTTGCGGAAACACTGGCTTTGGTTCATGGGTTTGTGAGGTTGCGGTGGTTTCGGGATTC
241	31803	c31803	2	9.068	Fvb2	5936434	ABxAB	1.41	2	7	-	106;T/C_162;A/T_171;T/C	AATTCCATGACACCAAATCTCTTACCTCCATTTCATAAAAAACCCTCTGGGCACGTCCCAAGCAACCAAATTTAGCATACATGTTAATCAAGGCATTGCATACAAATTGATCAAACTCTAGTCCATGCTTTACGACATACAGATGGATCAGGATCCCACTTAAGGAATCATTTGATTGTGCACAAGCAGTCAGTAGACTTGCAACGGTAATAGGATCCATCTTTACACCCTCCGATCTCA
242	29922	b29922	2	11.799	Fvb2	7972127	ABxAB	3.01	2	5	-	202;T/C	AATTCCCATAAGAACTTCGACCTGCACGTTGGAGATTTTGAGGTCATCTTTGATGAACAAGGACGCTCCACTCATTACACCAATATCTGTAAGTAGATAACACAAAAAAAAAACTTAATCACCCATGTATATAAAGACAACACAGTTCTCCAGAGCTAGAGATGTCCAGCTAGCTGATCATTTCGAAATGAAGAAATAGAAATGATTACATACCATAACCGAGTAGGATAGAAGTCATGG
243	19092	c19092	2	11.855	Fvb2	2085375	ABxAB	2.29	2	4	-	238;T/A	AATTCCTGCTAGCTAGCCTCTCTAAAAACAGAACAACCAACCGAAAATAGAACACAAAGAGAACAATTACATACACCTAATTGATTTCATTTTGAAGAACGTACTATGTGATGTGCTTTGATCAAAATGATGAAGCAAGGTATGGAGGGGTTGATTCCCTTTCTATACCATGCCATCAAGAAGCGAAGATCCAAACACAAATACAGAAGGTATTCGGAGGGCAATACGAGAGGTAGCCTC
244	27116	c27116	2	12.74	Fvb2	6270104	ABxAC	3.64	3	32	-	133;C/A	AATTCTCATGACATAAAGTGTTTCTTCATCGTACCTTTGGCACATCTGCAGTTGTAGAACTTCAACGATCCAGACATGTACGGGAAAGGAAAAATACACTGATGTTGTCATCACCAAGGGGCCTTAGCCACTTCTTTGAACATAGCCTCAAGGTTCTCTGAACTTGTATTTAGAGTCTCAATCTCAAGGTTGAGCCTATTTATGACCTCTTTGGCTCTTAAAAACTTTGCTTCCAGGGTT
245	16969	d16969	2	14.324	Fvb2	8262121	ABxAC	0.96	3	45	-	80;A/G_88;A/G	AATTCTATCCAAAAGCTCCCCACCTTCACACAACCTACAATGTCATAATTGCATACCATGTTGTTACAGATGAGTTAGATAAATGTAAATTAAAGTTTACAAAATTATAACACACCCATGATACTTAATAGACACAATATTAAGCTTAGTGATGTATTCAAAATAATATAACTCTTGCACTGCGCTCAATAACTATAGTTTATGCGAATGCATGATGTAACATTGTTTTAAATAGAAATT
246	18165	c18165	2	15.141	Fvb2	6201764	ABxAB	4.55	2	4	-	38;G/T	AATTCCGAGGCGGCAGCCATGTGGAACATCGCGAAGTCGGCGGAGGCGATGTTCTCGCGGTGGGCCGTCAAGAGAGTCTGCAAGTTCGTGTTGAAGAAGAAGCTCGGCCAGTTCATTCTCGGCGACATCGATGTCGACCAGCTCGACGTCCAGTTCGCCGACGGCACCATTCAGCTCAGCGACCTCGCTCTCAATGTTGATTTTCTTAACCAGAAGGTAAGCACAGCTCTCTCTCTCTCT
247	18370	d18370	2	15.2	Fvb2	9959223	AAxAB	0.2	1	22	-	165;T/C_166;G/A	AATTCTCACACTGGACTATTATCCCGCTCTCATCGGCATCGAAGTAGCAGCAGACAGAAATCTCCAGTCACAACTGTGGAGTACCGAAGTTTTTCTCTGCTAGCTCGTGGCCCTGTGTTGCTGACATGTACTCAAGATGGAAGTTTGTCTTTCTTTAGGTTTGGTTGCAAAACTTGACTTTTTTGTTTCAAGATTTTTTACTTTGTTTTCTTTTTTTACTGACAAGATGATTGTTTGTCA
248	41904	c41904	2	16.232	Fvb2	12564246	AAxAB	2.46	1	41	-	54;C/A_104;A/C_129;G/A	AATTCTCGTTGGCAGAGAATCGCAGCAACGAGACTGACCAGGTGAACATATCTGCCCCGACCAAATATTTATTGGCAGCTTAGAACGTTAGACTTGTTTGATTCAACGCTGGTCAGGTCAACATTGCTGGGCACTGTCAAATAATGCAATTTGGTTTTCTGAGACAAGTGATCAGTTTCTTTCTATGATTTAAGGTCAACATTTCAGGGCATTGTTCATCCTTTGAAATAGCCCACGCAG
249	5549	d5549	2	16.89	Fvb2	14949231	ABxAC	0.35	3	44	-	14;G/A_122;A/C_127;T/C	AATTCATGAACAAGGTACGAGCATTTCTCATTCCATTCTATAACATCTTTTTCATTGTAACGGATGGATAATGGCCTTGCGTGGTGCCCGTGGCGAGGCAAGTAAGGGAGAAGACAAAGGTTCTATCCGCCATGCAACTCACCAAAGCTTGGAAGAAGGGCGAGCCTACTTTCCTAGCAACCTTCAAGATGGACGAAGAGGTTGGAGGAAAGTCCGAACCTTTGCCAAAGGCAATAGAGG
250	6933	a6933	2	18.215	Fvb2	9325255	AAxAB	0.12	1	9	-	33;G/A	AATTCTCCATTTTTCATAGAAACATGGTTATTTGGTTAATGAAATTGAATGGTATTGGACCTGGAAGTTTAGGTAAGTGGATTTCAATGTTGATGACCGCTGATGTTGTGAGTTTCATGTCAACCGTACAAGAGTTTAGATTGTAGACTGATAAGACTTACTGTCAATGTGAAAAGATTTTGGCTTGATATAGCGAATAGTTTTTCTGTTTTTCAATGTTAATTAAATCATACATTACTG
251	36701	b36701	2	36.535	Fvb2	15607415	ABxAB	0.14	2	26	-	90;C/A_110;A/G	AATTCCTCTGGGACGTACTCTAAGATTATCTCAAAGGGTGAAGAAAGAGGCATATTTGATATTTTGATTAATGAATGAGAAGTACTGAACCATACTCACATAAAAAGCTAAGACAACTCCAGCACAGTCCCTCACTGGTACCTTGATCCTCAGATTAAACCACCCAGAGCCGAACCATTGCTTGGATTCAAACCCAGCCCCTGCAATAATATTAATCAAGTTAGGTAATTTTTGGCAAAA
252	13012	c13012	2	37.368	Fvb2	16061041	ABxAB	0.02	2	2	-	203;G/A	AATTCTCTCTGGTGCTCAAGGTGTCTCCATGCTCGCTCTCTAGATGGGTCAATGTCTGAGGGCCGAGTGGCAGGATGAACTCTCCTAGCATGCCGACGCAACTCCTGGTAGTTACCAGAAAAAGAGCATGCTTCACGAGAACAACTTCGCTTCTTCAGATTAAGATACTTTCTGCAATCTTCCACAACCTCCCAGCCGAGGATGGCTCCTCGGCACAAAGGACATTTCAAGCTCAAATTT
253	42691	c42691	2	39.42	Fvb2	16168344	AAxAB	0.03	1	23	-	16;T/A_194;G/A	AATTCAATTCCACCAGTGAAGAGCACAGAAGCTTTCTTTAGTAACTGGGAAAATTGCAGAGTTATATTCCAACCCAGGTCCAAGTTTCTCACCAGAAAACGATACGCTTTTGACCATGACGAGGTTAAAATCACCAGGATAAAAAGTGGTCCTTACCAAATCTAGGTTTCTAACCCAATAACATAGCTTACATCGCAAAATAGTTGACTGTTTTGACTGACATTTTCACGGTAAAAAAGT
254	39361	c39361	2	41.148	NA	NA	ABxAB	0.57	2	2	-	15;T/C	AATTCCATCTTTGATTGATTACTCTCGAATTTCAGATGTTGAGTTTGTTACTGTTTTGATTTCAGAATTGGTAAAGTTATGAATGGGAGAGAAGCTCGATCAAGCTACGAGCAGTGGTTTGGTTGTTGACTTGTGTATTAGCTTCTGGAAATCAGTTGCCTTGAATGCTGGAGTCTGAAATTTGAACGTTTGCTTGGGCCATAATTTAATATGGAGTTGTAGAAAAACAAGTCGGTATAT
255	29415	c29415	2	42.52	Fvb2	19089347	ABxAB	0.13	2	3	-	105;T/C	AATTCCAATCACCACCACTGATACATAAACAGCCTATTAGTGCTCAGTATGTATGCTGTGCTATTGCTAACAATAAGCAAAGAGAAAATGTCAATGGTAATGTACTAAAGCTTGAAGCTTAAAGAATATGAGAAAACACAATAACATCTGAAGACCAATCCAAACTGAAATCTGGTGTGACAAAGAAGCAAATGATAATCTACCAATGAGACCAAGCAGCTTAAATAATAGGGCAAACCT
256	17965	c17965	2	43.416	Fvb2	19730196	ABxAB	0.02	2	2	-	94;G/A	AATTCACATTGATACAAGGCAGTATACATATATACAAGGCAAAGTCCTGACCTACAAGGTAATCTCCTACAATCAAACTAGAATCAGGAATACAGTAGGAAATAGATAACTACAGATTATACATTCCTGATACAATTGATACTCAAGATCACTTTCCTAACAGCTTCTATGCCAAACCACATTTCCTTGGTACATTGATGTTGTCCACAAAGCCATCGTACCTAGACTGGTTGTTATAAG
257	27498	c27498	2	45.213	Fvb2	20740282	ABxAB	0.01	2	3	-	39;G/A	AATTCCTTTTCCAGTCCTTGATAAGGCAAGAGGTGTCAAGTACTCAAAACCCCAATCCACAATTCCCTCTCTAAAAGTATACAAACGAATCCAAGACTCGGACACTCCATATTCTTTCATTTCCCAGATATCATGTTCGGAAAAGCCCACAAAAACACCCATACAGAGTTTTCCATTCAAAACTTCCAAATCCATTGTATTATGCCTCTGAAACGGGGTGTGAAACTCCTTGAAAACTTC
258	17003	c17003	2	49.123	Fvb2	27233633	ABxAB	0.91	2	33	-	193;G/A_227;A/G	AATTCTGTCAAACATGAACCGTTCATGTTTATTACAGAAAGACGCCATTTTGAGGGCCTTAACGATTACCAAATTGGCTGAAATTTTGCAGAGATGATCTACACAATATTATCTAGATACTAGACGGTGAAGATGAGGAAATTCGATCGAAAAGTGGTGCAAAAATGAAAATCTGCACCAAAACCATTGGTGCGGACGTCCGCAGCTGAGAAGGGCTGTATATATATATGTGTGTGTGTG
259	41508	c41508	2	50.069	Fvb2	24270205	ABxAB	14.47	2	43	***	58;T/G	AATTCACTAGGGTTAGAATGGTGAAGCATTTTAATGCATTTTACCCTCAAAATGAAGTTTTTTCTTTGATGAATAATCTATCTACATGGGTTATAAGATCAATATATACAAGTATGTATGAAAGTAATGACTCGATCAGGTACTCTCATAATTTCTGAGTGCTAATAATGAATCCTAATGATCTTTAAGGAGTCCTAGAAATCAAAACCATGTAGTAGTACTAGTCTGGAGTTTTGTAGA
260	5934	c5934	2	50.238	NA	NA	ABxAB	0.47	2	9	-	28;A/G_38;G/A_42;G/A_59;A/G	AATTCTATTTCAAGTAAGTAAATGTGTCATAAGTTCAAGATAGTCAATAAGGCTATACAATCAAAAATTCAAAAATTTATTAGACACGCTACAGAGACTAGCTTATCGTAATTTTTGCTTAGATAGAAAATAAAGTAATATCTAATCAATAAAAAATACAGTATTAAATTATAGTAATTTTTTTTAAAGTAATAAAGTTACGTATAATCAATAAGAACAATACAGTCAACTCACAGAAAT
261	13557	c13557	2	50.378	Fvb2	23842956	ABxAB	7.29	2	35	*	230;C/G	AATTCAATCTAATCATCCCCAAATACCAAACCCATCACAATAACTTCCAAAGCAATTGAAACACACAACAAAGCAACAATCTTGACAGAAACAGAAGTTACCTTGAGAGAAAAATTGAGAGCCACAGAAGGGTAATAACGAAGAACACTGCTCCCATTGCCTCTCCACAAAGACAAGATGCCTTCTTCTCTAACCGTGCGGGCTATGCAATCCAACATGCCTTTGAATCTCGTCCTTCCT
262	18137	c18137	2	51.94	Fvb2	25268577	ABxAB	0.35	2	0	-	98;T/A	AATTCCATTGCCACAGAAGAGAAGATCAAATGCTTAGAGTAGTAGATACGGGGAAGAACCTGGGGTAAATTATGTTGTAATGTTAATTTGCATACAAATTGAATTTCATATATATAAAATTGTATATATGAAGATGTCTCAATGAGTTCGATACAATGAACTTTTTTAATAGATTACTGCATTCAAAAATGAGTTTTTAAGGCGTGTATTTTGTGACTGTCAAATGTTATATTGTAGAAA
263	37210	c37210	2	52.307	Fvb2	25888807	ABxAB	0.69	2	3	-	122;A/T	AATTCTCTAAACACCTTCTAGTTGTACTCCCGTCCAATGCCAAACCAGGCATGACTTTGAATGAAAGCACTTCATTTGGACAAGTGGGTTACTAGTTAACTAGTAGTTTTGAAGTCGATAGAAGTTTTCATTGTTCCAAGCTGAAACTGTATGCGAGGCTAGCTCTCCCCTCGATTCGTTTGATACTGTAGCTCGTGAAGAACATATACTAACTTTGTTTAGTTGTTTAAAACAATTATA
264	3926	c3926	2	52.691	Fvb2	25554222	ABxAB	0.73	2	10	-	38;C/T	AATTCTAAAATTAAAATGACCTTCATACATGCAGAAATCTGCATGTAGAAGGTGTGTCGTCTTCATATCTCTAAAATTTGTGATATATTTCATAGATAAATAATCCCCAGATATAGCATAAAGTTGGGCAGTTACAACACACACATTTTGAAACCTTGAAAAACGGAGTAACAACTAGAAAATCAGTGCAGCATGTAGACAACACATCTCAGTATGAGGCAAACCTGGCTACGATAAGCA
265	12919	c12919	2	53.423	Fvb2	25276870	ABxAB	0.57	2	16	-	103;A/G_109;T/C_180;A/C_227;T/G	AATTCAAGATACTTAATTATTACATCCTTTATATGTCGTATAGTTGGATGATTAATAACAATTTAATATTAAGATAAGGGAGGGGTTTTGGGCCTGACCTCAGAGGGCCTAACTTCTGGGTTCCAACCTACCCCTTGACCTCCACCTGGAGTGTCCGAAATTCTCGGCGCCAGTTTATCTACAACCCAGTGTCCTTGTGCAGCAAATGCGCGTGAATTATTGCCTTATTAGATAGGAGCG
266	36857	d36857	3	0	Fvb4	6877760	ABxAC	9.49	2	5	**	97;C/A_115;A/G_130;T/C_214;T/G	AATTCAAATGACGAAATTAAAGAAAAGAATCTCCCTTAATTTCTGATTTATATTAGCAAACTCAAATCCTTGATTAATGCAGAATTCGTTCTCCCCCCTTTTATACACATTCACAGATTCCTATTTCATGTTGGATTAGGTTCCCTGACTTCAAATGGATTCCATGTCTCATAAGAAAAGAAAGTTTCCTAAATATTTTAGGAAAGTCATAATATGAAAGATTCAGAAATAGTAAGTTTC
267	7450	c7450	3	0.149	Fvb3	519132	ABxAB	4.36	3	57	-	161;A/C	AATTCCAGTATTCTCACTATTATGCTCTTTAGTCCTACCCAATACCAAACATGGGTTAGGTATTAGTATTACATAAACCAGGTTTGAGGAGTCCTAGACTACCATAGAAATTAAGGTGAGCTACAATAGTCTATGAAACAAACATGCTGTTAGTGTTTTGTATCGTACTATCTGAAGTCTGAAATGATGAGCACAGTATCACTTTACTTATTGAATATCCTCACCTAGTCTCATTATGTA
268	25097	d25097	3	2.02	Fvb3	2009805	AAxAB	0.36	1	8	-	86;C/T_108;G/T_163;A/T	AATTCATCTCTTCATTTCTTTTGTGAGATAAATATTACTTCAAGAGCCTAGGAAATCAATTATGACATCCTGCATTATCAATGGGACGATTTGCCTCAAATTTTGATGGTAATGTCAATGGTGTTGCTTCAACCAGCTTGGCCCATGAACTAATTGACATGGAACTGTGGAAGTCATCCACGATCTACCTACATAAGTACATATACCTCATTTGAGGTCTCACTCTCAGGCCTGTTATAT
269	11679	b11679	3	3.194	Fvb7	5463055	ABxAC	9.88	3	9	*	159;C/A	AATTCGGTGACTGCTTCAAGAATTTTGGGGTTTTGGAGAAATGAGTTTTTCTGGGTTTTTGCTTCTTGTTGGGAAATCAATGTTCTTTTTCGTTTTTATTTTCAGGGAGTTTTTCTGACACCTGAGTTAATTTCTATATATAAGTTTCGAGAGATTGGAAATTATTGGATTATTTATAGAAATTGGCCGTCTAATCTTCACCGTTCCTGCATCTGTGGTTTATCTTAATTAATAGTGCTG
270	36793	a36793	3	7.282	Fvb3	3457116	AAxAB	1.17	1	42	-	209;T/A	AATTCGTTATTATCTTCAAAATTTGGTTATGATTGCCCTAAATCATAGAATGCTTGGTTTCAATGTTATTCCAGAAAAAAGTTCATTGCTTTGTGTGTTCCCTCTTGTTTTTTTCTTCATCAACACATACCCTTATGGAGTTTAAAGTAGATATGACCTTGTTTAGATGCTCAAGTGATGTAAAGGTGTGATCTTTAAAGAAAGTTGAGTGCTTTGTTTAGTTGGGTTTTGAATTTTGTA
271	13006	b13006	3	11.998	Fvb3	4279149	AAxAB	11.12	1	41	***	234;C/A	AATTCTGTGGAGAAAATAATCCCACGAGGTGCCATGACTTGGGCTTTCATCGATGCCATTTATCGAGGGTGTGGAAATACATATGGAAACTTGTTGCTTGCAATGCGATCTACCGTGCTTAAGGATTGTATTGATGCAGCCTCACCCATACAAGAACCACAGCTAACTTCAAGTGTCGTGTTTGATGTATTCACAAGGCCTTTCTCCCTATAGAAAGCTAAGCCAAGATCCGATAGATCT
272	6488	c6488	3	15.412	Fvb3	5996535	ABxAB	7.19	2	37	*	31;T/G_32;A/C	AATTCAAGTTGATGAAACATGCATTCAAAAATAACCAATTCACAAAATCAGACCTGCATGTATAAGAGCTCAATTGTTCCACCATTCCCAGCAGGAATTATACTCAGTACATCAAGGCAACGGCAATCTCGAAACCACGATGGACGATCTTTAAGGATTTCCGCGACCTACAATAAGAAAATAAACAACAGAAGCATGAGAAAGTGTTTTAAGTGCTAAACATATGTACATGTACTGAGG
273	30484	b30484	3	17.787	Fvb6	3203267	ABxAB	0.69	2	41	-	72;G/C	AATTCTAGGTTCCTTCAACCCTGATACCAAAGTTTGGAGCCTGCTGATTACTGCTGAAAACATGGATTCAGTCGAGTTTCGAAATCTTGCAGCTTTTGAAGCTAGTGTTGTTGAGTCTGATGGGGAGTGTTGCTAGTGTACTCTAAGAGGGACTATAAGCCTTGGCACATGCATGTTCAGGCTAGATTGGTTGCAAATGAAATGGGTGAAGGAAGTTAGTTTGGTTAAAAGAGTGTTATT
274	34122	b34122	3	19.557	Fvb3	9209882	ABxAB	1	2	49	-	147;T/C_227;A/G	AATTCTGGTAACTTGGATTTTGTTTAGGAAGGATCTTTTACTACAGGACAAAAATAAAGTTAGAACTAGATTTAAAGAATCTGTGATGCTGTGAATTGGCCTGCAATGAACATGTTTCCATCGCAAGTGATGGATTAAGTGCAAGAATGGTGCAGTCAAGTGCTAAAATTGTATACGGGACTAACTCCCTGTTAGATGCTAATTGTTTGTGAATGATTACTTAAGTCAGAACAAGAAGTT
275	10539	c10539	3	21.919	Fvb3	7477242	AAxAB	0.03	1	5	-	51;A/G_106;A/G_164;A/G_227;C/T	AATTCTATTGCTCTGGCAAGTTCTTCAGGCAACAATTTGGAAGAGTTACTCAGTCTAAATGTTGCAAGGGGCAGCACTCAGACTCTGCCTGATACAGCTTGTACTAATACTGTTCCTTCAGTGGTAGAAGTGCCTTCCTCAGTTAATCAATCTTCTCATTCAGCAGTTCCTGGTTCTTCAAGTGCTTACGAGTCCAACTCACAGCTTTATCAGGGACAAAAATTGCACAGTGGAGACACC
276	37523	c37523	3	22.86	Fvb3	7238732	AAxAB	0.88	1	8	-	177;C/T	AATTCCCAAAACATGAAACAAACCAAGATCTATCAAAAACTAAAATACCCCCATCAAAAGTATGGACCAAATTACATAAAGCCAGATCTTCTGCTATTCGATCTCTTCGCCGTTCTAGCTTATATCTTAACCTGAAGCCACCAGACATAAGCTAGCACAAAATCAACACCAACTGGACCCTATTCTAAATTTCTAATACCTATTTCTATATCAAGCTGCATCTTTTGCCGATCTATTTGA
277	24465	b24465	3	26.023	Fvb3	18887471	AAxAB	0.35	1	43	-	225;C/T	AATTCCTCCCACAAATTAGCTAGATATTCTATATTGATATATTATATATACATACATATGGAGCTTTTACATATGTATTCACTCATCGGTCTGCTCCTCGGGAAACAGTTCCTTGAGTACTTGCTCGCACTCAGGAACTGCTTCCTTCTTCATGAACCCAAGGGGATTGGCATAACGAGCCGTGGAAGCAACACCATTGTTATATGTGATCAAAACTCTAGCCTTCTCAAAGTCATCGAA
278	39799	c39799	3	29.442	Fvb0	825037	ABxAB	2	2	11	-	38;T/A_59;A/C_172;G/T	AATTCTATACCGCCCCTTTCTCACTATATATCTTCCCGTAACAGAGACTTGGACAATAAAGAGCTGCGCAGATAACTGTAAGGAAGGGATGGAGCAAGTGCCAAGATGATATATATGGGAGACTGGGATTAATTAACCCATGTTTAAAGCCAACACAATACCTCCAAAGTGAGGTAGCAACAAGTCAAGTCTGCTTCGGAACTATAGGATATGCTGAAATGTGATTAAATTTGAGTCCTG
279	17008	c17008	3	30.213	Fvb0	1725897	ABxAB	3.9	2	30	-	69;T/C	AATTCAACGCTCACACTTTGAAATCAAACTTAGCCTTATGAAAAGCAATACCAACTGACCTCCTCCCCCTTCTTATCATCATCAATGCACTTCCACCATCTCCATCTTTCTTCCTCAAAATCTTGAAGATCCCCCAACTGGGTCGCCATCATTGCCCTCCTAGATCAAAACCCACATACCAATTCCTCTCCCATATGTCTTTGCAGACCCGCCACGATTTGATCGAGAGGCAATGCAAGA
280	1293	c1293	3	31.044	Fvb0	902655	AAxAB	0.01	1	30	-	166;C/T_213;C/G	AATTCTTAGCCATCTCTCTTCTCATCTCCTCCTCACTGTAAGCTCCCTCTGCCTTAGCTTTCTCATACTTGTTACATGCATAAAAACCACCCGTCACCCGTTTTATCACCATGTTCCGACCACGGACCAAGGCATAGCCAGCAGAAGTGAAACTTACAAGGCGGTGCGCATACCATGTGCATACAACCCTGGTTTTTCTCAATCGCTCGTTTGCACTTTGGACATGGCTTAGAGTTGGCC
281	34496	b34496	3	31.792	Fvb3	12897265	AAxAB	5.63	1	34	*	52;G/A	AATTCGAGAGCGAATTGAAACCTTGCATGATTTGAGTGTGATCGGCTGCTTTACATAAATTATGTACTGTATTTTGTTTTAGGAAAATCGGATTATTTTGTTGAGCCTGTGCTGAATTTTACTGTAAGTTATATTTTATTTTATAAATTTTGATCTGAAATTGAAGGAAGAAGATGAAGATAAGTGTTAGGGATTTCTACTTTTGAATTTATATTAGTTATATTAGTCAGCGTTATGAAG
282	37511	c37511	3	32.317	Fvb0	1422906	ABxAB	1.92	2	56	-	57;T/C	AATTCATAACATATCGCAGTCCCCAGGTGATTTATCTAGTCCGCGCGCAATAGCTAGTCCATTATCTCAAATTTTTGTTACACGAACAGTATGTTCAATCTCATAATTTCTCTCCTAACCTAGTATTCTCATTTGCAAACTTTATATATAGCATTCCCAAGTATGACATTCTCCAAGTTGTTCCACCGTTTTGGATTCAACGGGGAAAGAGCCCCAGAGTATGTCTTACACACCGTAAAA
283	6255	a6255	3	33.233	Fvb3	21045411	ABxAB	4	2	13	-	179;C/G	AATTCAGTATGATTATACATCATGAGTTTGGGTTCTAATTCTGCACATACTAAACGGCAATTGAATTTGGATAATGGCATACAAATCTAAGTGAAAGCGTACCAATTTCGTTTGAAGTTTTATATGCTTTGAACCAACAAAGTGAAAGCGTACAAATTTTGTTTGAAGTGTACACTCTCCTTTGTTGAAAACTTATTCTTATTCTCAATGTCACATAACGTAGTTGGACAGTTGTGTTCT
284	33032	b33032	3	35.26	Fvb3	21044399	AAxAB	0.06	1	2	-	112;C/T_142;T/C	AATTCAAATGGTAAAACACAAGAATGCCAAAGGGAAGATACGGCATAGTGAGAAAAGTGCAGGAGTAATTCCAATTTAGCTACGAATACAGAAAACCCTCAAGCTCTATTGATATCAGAGAAAAAGAAATGACAGCTGCATTCCACATTTCAACATGATATGACCAGTCCAAAGTCATAAAGAACAAACAAAAAAGTGAAACTAAAGGCAATATGATTAACATTCAACATAGGATGTGAT
285	19791	b19791	3	35.319	Fvb3	31515269	AAxAB	0.01	1	6	-	116;G/T_199;A/G_220;C/G	AATTCTTCAATCTTGTGAACCTGGCATTGAGCAAAACTGGATGTTCAGTTCTCATCTACAGTAAATCACTAACATGGACTGAAACATTGCTTGAAATGAAGCGGAATTACCAGTTTTGTGAATACTATCTTCCATCTATCTCCCACTTGCTTCTTCAAATGTTCGGTTACCACTGGTGAATTACTGCAAAAAAAGGTTTGAGACATTATATTCAAGTATGGTAAGTCTTGATGTTTTGAC
286	15426	b15426	3	35.341	Fvb3	21818139	AAxAB	0.98	1	22	-	7;C/A	AATTCTTATCCAGTTGGTCCAAGACTTTGTATCATCTCTTGTTGGTGTTGTACATGAATATGAGGGGTATAAGTTAGATCTAGTACATAACTAGAAGATATAATTCAAGATTGTGTTGTCATTTGATTGTCAACATTTCTATTTCTTTATAGTGATAGTCTCTGATGCTGGTTTGGCCAATATTCATAGTCATTCATTTGTATTCGGCACAATGTTTGACCATGTATATATTACAGGGTA
287	38049	b38049	3	36.21	Fvb6	15251135	AAxAB	0.06	1	4	-	41;G/A	AATTCAATTCAGCTATGCTAGCTAAACAAGATTGGCGTGTGATTCATCATCCGAACTCTTTGGTTGCTAGACTCTTCAAAGCTTGGTATTTTCCAAACGACTCATTTTGGACTGCTACTGCTCATACCTCCCCATCATTTTCATGAAGAAGCATCTTTTCAACACGAGACCTTTTACTTGAAGGTAGCTATTGGCAGGTAGGGGATGCTACTCAGGTAAATGTATTAACTGATGCTTGGA
288	21265	b21265	3	36.29	Fvb3	22676183	AAxAB	0	1	1	-	11;A/C	AATTCCCCCATCTGATTCCATTCACATTTGAGATAAACAGTGAATGCAGTTCCACCAGCTAGTGATATAAGATCGTATCTTCTATACACACTAAGCATTTCACTATCAAACCATGGATGGGATAGGCGCATCTGGAAATAACCACGATATAGGAGGTCACAGCATCATTAACGACTTTGAGTTACAAGACTTCATAGACGATGCAAACTTCGACCAGTTCCTCGATCTTATTCGAGGCGA
289	2881	b2881	3	37.714	Fvb3	17191119	AAxAB	0.18	1	8	-	21;C/T_30;T/A_70;G/A_148;C/A	AATTCATGTGACAAATTTGTACAGCAACTTTGATAAAATTAGAGAATCAAATTCACATATTGACGATGCAGAATGAAAGGAAGGGGAAACGGTACATTTTTATTTGGATATACTCCTGATCAGTTTGGGAGGCTAGCTAAATTTTTTTCTGGGGCCAATTTTACTAGTAGGATGTGATGCACGCAACGATGTGAGGGGATGGATTTTCTAAGTTGAAGAAACGTATTGAAAGGTCTAGAA
290	22748	c22748	3	38.707	Fvb7	14775157	ABxAB	2.51	2	3	-	207;T/A	AATTCTAGGCTACCGTTCTGGGATTAAATCATCTACTGAAGTCAATATTTAGCATAAGAGCATGATTTCCATTGGAGTTGGACAGCAAAATGGGAGGTAAGCTTAGAGAGCAAGCATACTGAAACTTTCAACACCCCTAAACACAACTAGCCCACATTTGTTTTTATTTGATTCTACACTATAAATACATTAGAGTTCAAATACTACTTGGATTTTTTTAATACCCAAACTCCAAACGTG
291	20303	d20303	3	44.726	Fvb3	26190714	ABxAC	3.6	3	45	-	166;G/A_211;A/G_232;G/T	AATTCTATAAACAAGAATAACACAAAAATCTGTTACAAACCCAACAACCAAAACCAAATAACAAACACACCCTCAACCCAAAAAAATAGGGAATATCAAAATTCAACTCAACTCAAAACAAAACAATCCAAAAGAACCAAACTTTAAACTCCCCAACTACTCAATTGTTCATAAAGCTACAAACTTTGACAAGATTAAAGAAAACCCAAGTAGAATCCAACCTCAAATCAATGAAACCCA
292	35401	b35401	3	45.758	Fvb5	16166158	AAxAB	3.96	1	72	*	29;T/A	AATTCAAAGTATAGGGGTATACCAGTTTTAAAAAAAAAGTGAAGGACAAAACTGATTTTAGGTGTAAACTACAGGGTGTCACAAGCATTTACTCCAAAAAGAAAAAAGAGAGGAAGAAAGCACGCGCCATTGGAGGAGCGTGGAACAAATTAAAACGTAACCTCCAATTTTGCTGTCGGATATGTTTATATTTCTGTTGGGTTCATTTCTGTAAAGACTTGTTGCAAAAGCCTTCTTAGT
293	15975	c15975	3	53.323	Fvb3	29873455	ABxAC	4.33	3	25	-	41;T/A	AATTCAATTGAATTGATTTTTCGATTATATAGTTTATTTGGTTTTTACAGATTGAGGAGCATTTCGCTGCGAAAGGAGTGAGCATTGTGGGGTACTTCCACGCGAACGAGAGGTTTGATGATCAGGAGCTTGGGAGCCTGGCCAAGAATGTTGGCGATCACATTTATCGCTACCTTCCTCAAGCTGCGGTGCTCTTGGTAGTGTGATTTTGTTTATTTATATGAGTTTTTCGGGTTTTTT
294	22006	c22006	3	54.764	Fvb3	30462757	ABxAB	1.75	2	6	-	160;G/C	AATTCAGTGGTTTTCTTAGCCCTAAAATTATGTAAGTGAAAAATACATTACGTATTAGTATATTATAACAATGTAAATTTGAACAGAAATGTGTTAGTTGGGCGACTCGTCAGCTAAAAATGAATTTTTGTTGATGTAATTCTGCTCTATTTTAGGTCTAGGGATTATAAGCTATATATAACATGCAGGGACCATTTCAAGGATTATGCAGATCTCTGCTATAAAGAATTTGGTGACAGA
295	19675	c19675	3	55.989	NA	NA	ABxAB	2.11	2	13	-	118;T/G	AATTCTACCTTGCCCCGACTCGTGACCCCTTTCTGGCTCGGGACCTCAGGACGAAACATGTAGAAACAATTGGCGCTAGAAGAAGGGTCCCTATCTTGTGGAACTCCCATTTGACTCGTCACCATGGTGGAAATCATTGATGACCCTACGGACCCTGGCACTCAAGTAGAGGAGGAACTTTTCCAACTCGGCGACACATCCCTTCCCCAAACCAGCAATGCAGCCCCCATTAGCCATCCC
296	15611	d15611	3	56.797	Fvb3	31128823	ABxAB	1.52	2	45	-	34;A/G_176;T/A	AATTCTATAGAAAACAAATTTAAAATTTCCATATATTCTGGAACTAATCAAAATAAAAGGTTGGTTTGTCCTACAAATTGCTTGAATGCAAGGAAACCTGGGTATAACTTTTATTGGTCTTGGTTTGAGTTGTGCAAGGACCTGTCTAGTTGCAGTGTTGCACTGTATTCTAGTTTTGGATTATTATCATATGTACATACTACATAGTACATGCCGCTGTACTGTGTTTTCTATGCTGTT
297	34144	a34144	3	0	Fvb3	2994561	AAxAB	1.53	1	51	-	100;G/A_191;T/C_208;G/A_211;T/C	AATTCATTATCTGGACATTCACACACACTGCAATCTCTCAGTCGACACATACCATCATCAGGCCAGAAAGGACAGTCGCACCACAACTTAACCTAACACAGTCATTTCGAAAAAAACAAATTCACCACATTCAGCAATGGCACATAACATCAAAATGCAGATGCATTGAAATATCAGTTATCCAAACAGATTCCTCTCCTGACTAGTTGAATCCAAGCATTCGAATCCAGCCTATTCATA
298	43012	a43012	3	5.176	Fvb3	4641646	AAxAB	0.12	1	13	-	8;C/T_24;T/C_98;T/G	AATTCATACAAAGAGCTCGCAAAATACACGTAATATGCAAAACAAAATAGCCTTTGTAAATGAAACAATACAGAAGGCAACACCAGAAAGAAGTTTGATACTTCAAATCCTCACAAGTATCAGCTATTAGACATCATTACATAGAACTGCACTTACCTAATTATACAAAATATGGAAAAGACACAATCAGGCACGTTTTCCACTGTTGGGATTGGTCTTGGTGCAGAGGACCTTCCGTCC
299	16364	a16364	3	5.738	Fvb3	4776474	AAxAB	0.03	1	1	-	64;T/C	AATTCAATTTTTTGTTCCCAATTTCGCCTCAGCTTCTCCTCCGAGCCCTAACAATGGCGGCTGATTCCTCCGACGAGACCAAGCACATCGAGAATCTCTACGAGTTCGGCGAGCGCCTCAATGATTCCAAGGACAAGTCCCAGGTCCTCTTCAATTTTCGATTGGTTACCCTGAAATTTTCAGTTTCTAGGGTTAGGGTTTCGGGTTTTGGAGTAATGGGGGTTTTTATTGTGTGTGGTT
300	4451	a4451	3	14.462	Fvb3	6534331	AAxAB	1.2	1	25	-	42;G/A	AATTCTTTTATCATCCATACTTTTACACCGACACATACCAAAGCATGTTTATGTACGCAGTAACGGATCCAGGAACTATCGTCCACCAAGGCAACTATGCATTTTGCGTCTAGTTTTTTTTTAAAATATTTTTTTCTTATGAAACGACGTCGGATCAGCGTCGTTTTGATATGTATTAAGAAAAAAAGGACGCCTGTAATTCACATCTTCTTCCCCAAATTCATCTGAGTTTCCCCATTT
301	31748	a31748	3	16.536	Fvb3	7018374	AAxAB	0.26	1	5	-	222;G/A	AATTCCGTCCCATCTAAACCATCTTCCTTGACCGTCTTTCCCTTTTTCTATATATGGTGTTTTTCCTTGTTTTCTTCTACCAACCTTTATGTTAGAGGGACATCCATTTGGTTTATCGTACAGCATAATATGTTTGGCTTTAATAAATTTCCATCTTTGTCCTTTCAGATGCTGCTGTACGGCAGGCTAATTGGGATACTTCAAGAGTTAGGGAAAAGCTCCGACGTGATTTAGATGCAC
302	10289	a10289	3	18.224	Fvb3	7095077	AAxAB	8.52	1	53	***	172;C/T	AATTCGTGTTAGCTGTGATTTGGTGTTATAGTTATGCATAGCACATTACTAATCAACCAAAGTTACGTTCACATATAAGTTTTTCGAATCTATACTGAGGCTTTTGCTCATTTCAGGTGTGGCCATGAGTTCTGTTATTCTTGTGGTGCCGAATACAGAGAAGGTCAACAGACGTGTCAATGTGCCTTCTGGGATGAAGATAACCAAGAAGATTTGGTCACTCAGTCTATGCAAGAATCT
303	17370	b17370	3	23.849	Fvb3	7576913	AAxAB	0.83	1	0	-	58;G/A_98;C/T	AATTCAAAACAATCTAAACACAGTAAATTATCATTCTTAAGAACCATAACAAGATATGGGCTAGCTTTCATAATCAACAACAAAACCAGGTCTTTCGACCTTAATCAAAATTCAAGCAATGTACAACTACACACACCTGATCAATGTCAATCTTAAATGTGGTCACATGTGGGTATTTCTCACTCAACTCCCCAATTACAGGAGCTATGAACCTGCCTGCAAACAACATAAAAACCACAT
304	2038	b2038	3	24.987	Fvb3	7690575	AAxAB	0.35	1	4	-	45;C/G_68;C/T	AATTCATAGAGCACAATTCTCTGGAGAGGGAATTATTACATAATCCTTCTTAATTAGGTGATTAGCAGCATACACTTGGAAGGCTCACCTTTCTCCCTCAGTCAATATTGTACGTCTACCAGGGTCCAGGGATATATGGACAAATCTCATTTGTCTCCTCCCTTAAACTAAGATTGGGCTTATCAGCCAAAAACTAAGATTGGGCTTGGTGGGGTGGTCTGCTTCTCTTGGAGTAGGCAC
305	36789	c36789	3	26.128	Fvb3	9209864	ABxAB	0.4	2	2	-	117;A/G	AATTCCTTAAAGAGCAAGGTACACCATGAAAAAATAGAGCCCAAAGAATCTAACTTTCTCCCTTGATTATGAACTCTACGAAATAAGGCCTCGGCCAAAATAGTGATAAACATACACATTATACCAATCCTATACTTCTGCAAAGAGGGTTCAACTTTCTAGGTCAAATAAGTTGGTACGAGTTTTCGACAGACACACAATATATAAACAGTATCAGATTAAACCCTTCTGCATGTTCTT
306	13071	b13071	3	26.913	Fvb3	8069186	AAxAB	0.06	1	4	-	67;C/G	AATTCCTTTCATTTTTGGGGACACAGTGAAACATTAGCAGGTTGACTCTTCTTACTTCCATAAATCACAGAGTTTTTTTTTTAATGCCTAACCCAGTGCCTAATGGTAACATGACCTCCAATTTCTAGTTGGAATTGGATTATTTCTACTAAACAAGATAGGAAATAAGCCCTACTCAACGAAAAACAGGCCAAAAAAGTTGCAGGGAGATGCTGCTCTTGCAAACGGTCCTAGGCTCCT
307	38306	b38306	3	28.609	Fvb3	8022575	AAxAB	0.01	1	2	-	204;T/A	AATTCCCAATGAGGTTAGGAATAGGACCTTCAAATCTATTACTAGATAAGTCAAGGTCTTCCAGATCTTTGAAGCTTGCCGATTCCCAACTAATGGAGCCACCGAAAGAAGTCTGACTTAGATTCAGTTTTGTGAGGCTGGTTAGGTTAAACAACCAGCTGGGAATTGAAGATTGGATAGGGTTATTTGACATGTCAAGGATCAAAAGTGATGTGATGTTTGGTGAACTAGATGAGAAAG
308	31528	a31528	3	29.154	Fvb3	8414415	AAxAB	13.22	1	47	***	205;T/C	AATTCTAGCTAGTATAGTCGATCATTATGCTCTTACATTCTTTAGTAGAGTGAGTGGGGGGAAAGCTTGTGGCAATGTATGGGGTTTGACCTTACTACTCGAGTAGTTTTTGTTTGTTTCGATTTGGATTGGAGTACAAATGCATGGCAGAGCAGTCTTCAATTCCACAAAAGTGATAAGGGGATAGAGAGGCCCTAGCAAAGCTTTAGAGCGGACGAAGTAAGGCTAAGGTCCCCTACG
309	4742	a4742	3	29.266	Fvb3	9504398	AAxAB	0.06	1	4	-	110;C/G_177;C/T	AATTCTGGTTGGTTCTGAATATTATGGGATCTCCAAATTAGGTTCTTTTGGTGGTTTGGTGAGTGCACTTTATGTTTAGTGTGTGCACGTTATTTAGTTCTTCTGGATTTCTTTCAGGAACTGATCATGTTATGAACATTGTGTATTTAGTAGTTTCTATCAGTTATACCTGTTGTTCTTAATGTTGTTGACTTCTTGAATCAGGGGTGTGATGCTTCCGTTCTCTTGGATGACAGCAAT
310	24065	b24065	3	30.001	Fvb3	10126274	AAxAB	0.03	1	5	-	165;G/A	AATTCCTCATCATATCAACAGAAAACAAATGGATAACAATAAAGAGGGAACAAAAGAGTGGAAATTTGAACATGAAGTAATGAAGAGAAACTAAGAGGAAGGGATCAACATACACTGGATAGCAGTTATTGGGTTGTGTTTGTTCAAAGAGTGATTGGTTGGTTCATCTTCCACAGCTTAAGAACCAGTTTGCTGGTTTTGGTTTTCTAGTTTGGTAATGGAAGAAATATTATAGATTTT
311	18258	b18258	3	30.065	Fvb3	10279783	AAxAB	0.01	1	2	-	141;A/G	AATTCAATGTGTCCATTAACTTCTTCTCTGGCCCATTTCCCAGTGGTCTTGCTAACTGTCATAATCTAGAGATTCTAGACCTTTGCACAAATAGGTTTCATGGGGAATTGATTACCCCATTCACCAAAATGGCCAACCTTAAGAAGTTGTATCTCTGTGAGAATTATGTTTTTGGTGAAATGCCTGACGAGATAGGGAACTTATCTCTTATTGAAGAGCTTGTGATTTATAGTAATAATC
312	16524	b16524	3	31.649	Fvb3	19657791	AAxAB	0.72	1	7	-	111;T/C	AATTCAAACCCGAGTGGTCTTCCGAAGTCTCAGAGCAACATAAATAATGAAGTAGAACCCCTTCAGTTTGGCACAGATCCAGAACCTGCATAGGTAGAAAGTTCGCAATCATGGAAGCAAACAATAAATATCAGAAACGATGATTATACAGTTCTTTTGAAGCTCAATAACATGAAATCTAGATTCAAATTCAACTTGAGAGCTGTAACCATTCTAATAATTCCTTATAACTAATAGACC
313	33089	b33089	3	31.743	Fvb3	19617024	AAxAB	2	1	17	-	137;A/C_147;A/T_172;T/C_183;G/C	AATTCGCTGGGATTTCTTAGTACTATTCCGTTTTTGGGCAACAATGTGTTCCATGTATTAAAACGGGTATGTATATTTGTAGTTCTTGCCATCATCAAACCAAAATGGAATGTCCATTGTGTACAAGCATGGTCACCAAGAGAGTTTATTTTTTTGATCAAAAGAGGTCATCTTTTATTAGCTGAGCAAGCAGTACAAAAACGATCCCTCTCAGTGAGGGCGACAGAAAAAACCGTTCCG
314	40808	b40808	3	32.568	Fvb3	8687017	AAxAB	0.12	1	9	-	30;A/C_155;T/G	AATTCCTGCTTCAATGCACAGACAATTTCAAGTCAAGGTTCATTAGAGTTGGTCAAAAATAAAAATAGACATAATTAAACATATGTATACGTTGGAACTAATCAGGTTGATAAGGAAAGGAGAATGAAGTAAGTCACTTACTCTAGAATAAATTTTCTGCACTATAGCATCATATGTGCCATCAAATGGAAAGAAATCATATGGCAAATGATAAGGCAGCTCCATCAGGGTTTCTTCGAA
315	8920	b8920	3	33.188	Fvb3	3950969	AAxAB	0.12	1	7	-	139;T/C	AATTCATGAAAAGAAAATAGAAACAAAGAAATGGGTTGAGCTCAGAGAGAAAGAGAAAGAGAGAGAACATACACTGAGAAGGAGAATGGGAATGGGTTTGGCTTAATACTCCGTGTTTTGTATCTCAGAACTAAAGTTTTGTACATGTATATATCTGGGGATTGAAGTTCTTACCTTAATACTTCGTAGCCAAACGATGAGAGACGGATCAATTACAGATAAGAGTACTGGCTGCTACAC
316	27099	c27099	3	33.823	Fvb3	11878601	ABxAB	4.65	2	48	-	113;T/A_157;A/G	AATTCACTCATGTCATACACTTCTTTGGATACTCGGGAAGAATGAATTTCATTGGCTTAGAGAGAGTGCAAGATTATCAAGGTCTTGGGAACTTTTTGTCAAGAAATTTACAATTGGTTCTTGTCTTCTAAGGTATATCTAGCTTTTAACTTTACACATTAGAGAAAACATGACAGATACCCATAGTTCATGTTATCAGATCATAATTAACTACTCATGAACACCAAATTACCATTGAGA
317	18152	c18152	3	34.316	Fvb3	12434210	ABxAB	3.18	2	9	-	217;G/T	AATTCCAGGTTGAAGTCCTTCTCCATCGATTAATCTAATGCAACATGCATTATTATGATGACTTGAACTTTGCCTTATCCTTAATATATGATTCTCTGTCTACAATACGGAAGAGAAAGAAGCTTCACTTCTTTATTTATGTTATCTAGGAATCTAGGATGGCTGCTATGATTATTGCTAATACACCACGTCTGATATTAGTATTCTGGTACTCAATGACAGATTCTAGGATCAGAAGAA
318	6278	c6278	3	34.322	Fvb3	12232150	ABxAB	4.11	2	35	-	115;C/G_188;A/C	AATTCTCAGTTTTCACACAAGCATGTTGCTGTAGATATCCATGATCTCTATCATGCAGATTCTAATGCCTTTCATTGCTTTAAACTTAGCAAACCCCTACATTGGTTTGTATCTTCGCTTATCAGTTGTCAGTATACTCCTGTAAGTTCAGACTTCAGATTATAACAACTGATATTATAATATTCTTGATGGAACAAACACATTATCCTTCATGATGCCTAATGACTAGTTGATTACATG
319	187	c187	3	36.079	Fvb3	13460046	ABxAB	2.83	2	42	-	29;G/C	AATTCATTTATTATATTCCAGATTATATGGTTTAATGAAAGATGCTGCCTCGTCAATAACATTGGAAGAGGTTATAGAAAAGCACAAAGTTCCATCCACTCATAAGTCCTCAAACAGATATGCTGTAGAAAGGAACATTACACAGGGAAAGGTGGAAGGCTCAGTTGAGGTATTATTTTGAATTTCATTTATCAATTTGGGCATAAAGTATGATTTATTTTTAATAATTATTTCTCTTAT
320	17993	a17993	3	36.221	Fvb3	13475835	AAxAB	12.84	1	55	***	78;T/C	AATTCATGGGTAGAGAAGGAGACTAACGGCCTCATCAAAGATATTCTTCCTCCAGATGCCGTCAACAACCTCACGAAGTTCATCTTTGCAAATGCTTTATACTTCAAAGCATATTGGGTTAAGAAGTTTTCCAAATTTTCGACTAGAAAACGTAATTTCTATCTTCTGGATGGGAAGCTCGGTTGAAGGAGTTCCTTACCTGAGAGGCGGGGACTAACAATATATATGGGCCTTTGAAGG
321	10317	a10317	3	37.229	Fvb4	2723523	AAxAB	1.17	1	42	-	67;G/A	AATTCCATAGACTTTGTGGTCATTACTTTTTTCACAGATTGTCGTTGAAGGCTGTTGTCGATGTGGCGCCTCAAAACTTTGAACGTATGAGATGTGAAATCTCGGCATATAAGGTTGTTAGGCTGGGGTCAAAACATGTGATTTAATCATTTCCAATGAAAGATTCCACAGATACCAAGCGAAGATTTGCCTTAGGTATCGAGTACGTCAAAACTCAAATGAGCAGAATGTTACGTTGCT
322	37590	d37590	3	37.579	Fvb2	24983973	ABxAC	3	3	41	-	57;G/C_118;A/G	AATTCAGTTGGCGGATTACTGCCCACACCCTAGATCAAACAATGGTATGGATGTTGTGAGGGATGAAGTTCAAGTAATAGTTAGTATTCATATTAAGCTGAACAAAATGTAAACTACAAAAGATTGGACCTTGAACTGGGAACGATGGAGAAGGAAATGTGGTCACAAATATGTCTGTATTTTTAACCAGGAACTATGAACACAGAAATATGCAGAAAAACGGGAACCCAGAAATATGCA
323	33352	b33352	3	39.926	Fvb5	10075212	AAxAB	0.83	1	25	-	47;A/G_127;C/T_147;T/G	AATTCCTTAGTAGTAAAAGAGAGTAAGTGTAGCTTTGGAGCATCTCAGGTTGAGTACCTTGGTCACATCATTAGTGGGAAAGGTGTGGCAGTGGATCCTTTGAAGATAGAATGTGTAGAGAAATGGCTGCTACCTTAAACTATCAAAGAATTGCGAGGGTTTCCCAGTTTGGCAAGATACTATCGCAAATATGTCAAGGGTTTTGGATTGATTGCAAAGCCACTGACCAATTTGCTCAAA
324	17009	b17009	3	40.832	Fvb0	1725897	AAxAB	3.67	1	13	-	118;C/A	AATTCAAGGCTCACACTTTGAAATCAAACTTAGCCTTATGAAAAGCAATACCAACTGACCTCCTCCCCCTTCTTATCATCATCAATGCACTTCCACCATCTCCATCTTTCTTCCTCAAAATCTTGAAGATCCCCCAACTGGGTCGCCATCATTGCCCTCCAAGATCAAAACCCACATACCAATTCCTCTCCCATATGTCTTTGCAGACCCGCCACGATTTGATCGAGAGGCAATGCAAGA
325	40707	b40707	3	41.728	Fvb3	17388612	AAxAB	0	1	13	-	212;C/A	AATTCCAACACAGTAACCCACTTAATTATACCGAAAAAACAAAACCCATCTATCAGCAAGTTTTTCTCAATCACCAAACAGAGGCACACAACAACAAAAGGAATGAAAAATCTGCTTAAACAAACCTGAGTCTTGTTATCCAAATTCTAAATTCTCGAAACCGACTAATTCCAAATAGCTCTATCTCTAAAATCCAAAACTATTAGCAAAAACTAAAAAGTGAAATGATACTCAAATTCC
326	2491	b2491	3	42.108	Fvb5	17073909	AAxAB	0.34	1	0	-	66;A/G	AATTCCATATTCTACTTATTAAGAAGCATGTCAAGCTTTGGGTTTGCTAGGAGACGATAAAGAATGGTGTGATGTCTTAACAAACTCTACACATTTTGCTACATCATCAGAATTACGTCAATTATTTGCAACAATTATTATATTTTGTGAAGTTGCTAACCCACAAAAACTATTCGACTCATATTGGCTCAACATGTGCGATGACATTATACATAAAGTTCGAACTGAAATGAAAAATCC
327	2186	b2186	3	42.924	Fvb3	22270525	AAxAB	0.34	1	39	-	7;T/A_39;G/T_52;A/G_155;G/A	AATTCTTAGCTCTGAATTGTTTTCTAGGTGTTTTAAGCTTCTTTCCAAGTCCGTATACCATTTATGTATGCTCCTTATAAAGTGGCTTCCACCAAAGTGCTGCTACCAAACAGCCCTTAATCAAATCAAGTGTCTCCCATGAATTAAATTATTATATCCCCAAATTGTTGTTTGAATTATTTGTATCTGTTTCTGCCAAGTCTTTGCATTTGGCTGAAATTTGTTTAGGGCCAGGTGTAT
328	2779	b2779	3	43.424	Fvb3	31518141	AAxAB	0.22	1	32	-	184;T/A	AATTCTTTTAAGGTCTGGTTTATGATTCACGTCGAGTACTATCACCATCATCAAATAACTTCTCTCTCGTGGCTTGTCTAAAAACTTCTTTGGAAAGTGTAGTCTTCCCCACTCCACCAACACCGTACTCCCCAGTCATGTTGGTATCAGGATTTCTCAGTTCCTCCATGATTCTCTTCACAACTGAAATCCTTGATTCAAAGGCCAGGTACCTCTTGGGAAGGAATGCCACATAAATGG
329	16999	a16999	3	50.511	Fvb3	24911094	ABxAC	3.87	3	14	-	171;A/G	AATTCAGCTGAATCAATGGGGATTACAGTAGAAACTCATGATGTGCAATCACTGAAGTCTGTGACTGCCAAAACTTTTGAAGATGCTATGGAAGTTGAAGCTCCTACGACCACTGGAGTGGAAACAAAGAATCCAGATGGAATAGATGGGGTTGATACAGAAATTTATGATAGGCAATCACAGAAGAGTATGACTAATAGTGAAGTGAATGTTGTGCCACCTCAGTTCAATTTAACATTT
330	19027	d19027	3	51.303	Fvb3	24327105	AAxAB	7.26	1	21	**	15;C/T_20;A/G_48;T/C_117;A/G	AATTCACACAGGGAACAGACAGCAATAGGTCAATAACCAGTCCAGAGTCCAGACCATCTCATCTTGAACCTATCGCATGCTATGTCTGCCGACTATTTGCTACTGAATTGTGAGCAGGTTGGATATATAATTGATACCCAAAGCAAAAAGAATGCCCAACGTACAAAACTCACATACACCATGAAATACTGATAACAAAATTATCTCTTAAAGAAAATAAAAGCCAGGGTACGTCGAGGT
331	16117	d16117	3	53.511	Fvb3	25850739	AAxAB	0.06	1	2	-	187;A/C_206;T/C_225;A/G	AATTCACAAATTTGCAGTGTAAATTTGGCCATTTCCTTCCCAATCTAATGACCAGGAGACAAGGAGATTTTAGTATAATTTTGTTTGTTAAAGATCTCGGATTGTATTGGCCTACCAAGAAAGAAAACCAGGTACTCAATTGACCTATTCGCTAAGTGGGCCACATCATTAATATGAAATGGGCCTGAGCCCACATATAAATAATTTCATCTCAATATCTCACGAAAAGAAGTAGATTTC
332	5054	b5054	3	54.395	Fvb3	29324519	ABxAC	1.88	3	7	-	62;C/T	AATTCCTGTATCTAAAAGTGAAGGGAATACCTTAAGATTCTTGATATCTATTCACCAATCTACTAAAGTTCTAGATTTGGAAGTGGTAGACCTTTCAAATGCTGTGAATGTTTCAAATTGTTTGGTTCACCTTTATGGAGTCATTAGTGGTCTTGTGTTAATTCAAATACTGCACCTGTATGCATAAAAGTAGAAGGCCAGAACTGAAATTCATTATTTGATATGCAGGAACTTCTGAAG
333	22376	a22376	3	54.888	Fvb3	27578862	AAxAB	8.67	1	48	***	15;G/T	AATTCATTCTTGAGGGATTGTGTGTCAGATATCTGTCCCCAGCCCAAATCAAATTCCTCATGCAAAAGTCTTTAGTCATCTACAATGGATGTGTCTAGTCCATTAAACAAAATAATCGGGCCACTTAGTTTCATCTGCAAGCCCAATTTTATTATATCATTTCCATCTTCAGGGTTTAGGGTTTAAGACCTGTGTCTGCAACTCTGCACCTACTCAACTGCTGCTGATTGCTGAAATAGT
334	15699	b15699	3	55.074	Fvb3	17946871	AAxAB	5.65	1	43	*	222;G/A	AATTCCATCCAATTTATGTTACCAGCGAATAAGTCAAGTATTGCTGACCTCTTGCAATCTCTTCCATCCAATTTTGCAACCCTAGACCATGTCAATTATTGTTGACCACATGAGCAATCTCTTTTGCCCATTGATCTGAGTTGATTGGATTCATGTGTGGGTCGAAGGTGGAAATAAGCTTAAATAAGAGTAAGACCAAAAACACTACTCAGTAGCAAAATTATACTCTGTCGATCAAAA
335	18083	d18083	3	55.257	Fvb3	29873455	AAxAB	0.12	1	9	-	34;T/G_57;A/G_59;C/T	AATTCAATTGAATTGATTTTTCGATTATATAGTTTATTTGAATTTTACAGATTGAGGAGCATTTCGCTGCGAAAGGAGTGAGCATTGTGGGGTACTTCCAAGCGAACGAGAGGTTTGATGATCAGGAGCTTGGGAGCCTGGCCAAGAATGTTGGTGATCACATTTATCGTTACCTTCCTCAAGCTGCGGTGCTCTTGGTACTGTGATTTGTATATCTATGAATGTTTTTCGGGGTTTTCG
336	20124	b20124	3	55.467	Fvb3	32529792	AAxAB	1.11	1	55	-	193;C/G	AATTCGTGTCGAAACCGAGGGAACGAGTTTCGATTTTTAGGTCTGTAGTGCATTGCTGTTTGTTTGCGATTTTGAGTTGGTTTTGATGATTATGTATTGATTATTCGGCTGTGTTTGCTTTGTTCAGGTTTTATTTTGATTTCTATTTCGTTTGGACTCGAGAGATTGAATTTTCGTTTTTGGTTGAATTTCGCAAGTGTTTGGAGTTGTGAGTGAGGATTTTTTCGGTTGTAGTTTGAA
337	4525	b4525	3	55.492	Fvb3	26428168	AAxAB	11.67	1	40	***	85;A/G_215;A/G	AATTCTAATAAGCTGTAAATGTAACGATGTTAAAATTTGAGCAACATGCTAACAACAAAGTGTTTTAGAATCTATGAACTCAAGAGGACAGGGATCTTCATCATGAAAGACTCATAGACTGATGGTATAAAGTAAAGATCAATGAGCGGAAGAATAAAGATTATAGCTGCTAGGCAAGTATTGACATTCTATGACTGTATGAAGGTCAAAACTACGGAGGGCTATTCATATTACATATTG
338	14553	b14553	3	55.66	Fvb3	26251435	AAxAB	2.65	1	60	-	32;A/G_227;G/A	AATTCTTCCACAAACACAAACTTTATTTCATGAAGATAGAGAATGACGGATAGATTGAGAGATGGATATGTGAATTGAATGAATGAAAATGAAAGAAAGGCTAAATGATAAATACTGATGAACAAGGAAGAGTAGAGGTCCCAATAGTAATATGCATGGACACAAAAACTTACACAGATAGGGATAGGTGAGTATGTGAAATGGGACCATGCACGACTACTACCTCTGCACCTCTGATCG
339	26422	b26422	3	56.627	Fvb3	25717997	ABxAC	35.08	3	41	***	11;G/A	AATTCCTTAATGCGACATTCTGTCATACTAAGAATCTCAAGTTTCTTCAGATGGCCTAGTATAGATATGTCAATTATTCTCTTGTTGCAATAATCCAAATACAAAGCTTGGAGGTTGGTCAGGAGACTGAATGATAGAGGAAGTACTGAAATACTAGTACCTCTAAGATCTAGGACCCTTAATGCATTCAGACATAGGAAAAATGATTCTGGGATCTCTTCTAAGTAACTATTCCCTTTT
340	17499	b17499	3	58.687	Fvb2	24070419	AAxAB	8.71	1	55	***	55;A/C_176;A/G_187;G/A	AATTCCATAGAAGGCTACAGTCACTACAATATTATGGTTTTTCCCCTAAAACAAAAAACATGAACTTAAAAGAGTACAGAACTACCATCCAGAACAATTATACCACTGCTAGCTCAACTCGAATAGGTTTAAACAATCACAACAACCAATGCATGACAAATCGTTTCGTGTAAGTTACTACTCAAAAGCTACTCACCGAGTACTCCAGGACCGCCATGATCGAAATAGTATATGAAGATA
341	951	a951	3	0	Fvb2	23451229	ABxAB	63.8	2	0	***	9;C/G	AATTCGATCCAGGAAGGAAAAGAAGAGATAGAGGTTGGAGGGGGTTACGGTTCTGCAACTGTTAGTAGGCGAGTGCAGGGGAGAAAGTGTCTGCATCAATCATGATTTCTGGGTTTCTCCCAACACCATCAAAATGGGTTTTGCCTTTTGATATCAGTAAACCTAATTCACCAAATATATTAAAACGAAGGTTGTTGAATTGGGATTTTCAAAAATGAGTTGTTAATTCGCAGAGAAGAA
342	4324	a4324	3	4.256	Fvb3	8200628	AAxAB	2.52	1	2	-	151;C/G	AATTCTATAAATACATGCCTCCTCTATTCTCATTTCCCAAACCATTTCGCAATACAAGTGTGCTTGAGTAAACCCGTTTCCAGTGTTTCCAATACCCACAAATCTTTCAAAAGTAATTCATTTCATTTGGTAATGATGAAGATGATCGAGACTGTTGGTTCTGCAACTGCAATGGAAGAGAGCAACAAGAACCCCTTCTACGGGCCATATGAGCACGCTCTTACCCAAAAAGTGATCAAG
343	37808	c37808	3	7.635	Fvb3	19157479	AAxAB	4.31	1	0	*	143;T/A	AATTCGTTTGGCTTGGTTAACGATTTAACTTTCTGCCATCTTCATGATTCCATAGTAGTCCGTGAACGTTCAATCGATTTCGGGATCGAAAAATCCAACTATTGTGTCATGGGTTCTTGTGACGGTTTGGTATGTGTAAAAGATTGTAGCCATGGCATGATCATTCTCTGGAATCCAAGTACGAGAGGCTCCAAAATATTACCTTGTATTTCTGAAGTGGAAGAAGGCAAAGTATGGCGA
344	6472	a6472	3	10.079	Fvb3	8976033	AAxAB	0.12	1	11	-	144;A/G	AATTCCTCAGACATCATGCTGGGTTCAAAATCCCTACGACCGTCTCAAGTTCAACAACTTCATCATCCGAAGATCAATTGTCCACTAAACAAAGCGGGCCAAATAATAATACGACTAGTGATGATATTCCAGCAAGAATCGACTAGAGGGAACATGGGGCTGTCACTCCTATAAAGGATCAGCGCAACTGTGGTAAGTTTCGAGAATCACCATATCTCAAACTTTCATTATTGTGTATAT
345	18124	b18124	3	13.834	Fvb3	25298573	AAxAB	1.88	1	41	-	79;G/A	AATTCCTGAAAATTTTAATTCCCATTATTTACTGTAGTGGAAGTGTTTGAGCAAAGCCGTCAATAAAATGGTTTGCTTGATGTGTGAAGAAAATGCCTTGGCGGTCTTTTTTGCCTTTCTTCATTTATATCCTTTTATTCATTTGTTTATATATTACTAGATTGGCCTTCTATGGTATTTGCTAGAAGGCTAAGACATATACATTTGTGATTCCTTATATACTTATCCACTCTGTATCAA
346	42004	d42004	3	15.583	Fvb3	10631589	ABxAC	4.46	3	8	-	66;C/A_92;A/T	AATTCCTAGATGGAGCATATATGGAAACTGCGGATTGGCCTTGCCTGACCTGTATCAAAAGGTGAACAATTGGTCATGTCTTGCTACGTAGCAGATAACATGCATGTAGTATATCCCAAAAAGTCTTCTATGCCACCTAATAAATGATCTCTAAAATGAAAAAGAAGAAGAAACAAAAACAAAAACATGTTAGAACTCACTTGTTAAATGGGATCAGCCCCCTTGAAAAATAGATGGCAT
347	21190	c21190	3	16.537	Fvb3	12249889	ABxAB	5.06	2	2	-	71;G/A	AATTCAAGAATAATAGCTGTAAACAAGGTATGGTTTCGTCTACATAAAACAAGCAGTGGGATAAACTATCTGCCAGTATAATCAGTTGTCATAACGAGCAAAGATTGAGGAAACTGCATGGTCATTCCAAATAGCAATCTAAACTTCATGATCCTCGACAAAATCTATTCAATGCAGATATAGGTACATACAAGTCCAAGAGAATACCTTCCACCTTTCTTCTTATTTATGTTCGACTCA
348	16259	d16259	3	16.614	Fvb3	12841381	ABxAB	27.36	2	51	***	83;G/A_132;G/C	AATTCTGCCGATCACCGCTGGACCAAGCAAGAATCCTGCCTGCACCAGACATATTATTCATGAATTTGGAAAAATATATAGAAGTGCAGGTAAGATGATTAAGAACATATATGTATTGTGTACTATATCGTCGTCATGTGTTAACATACTGTAGAGTCTCCCTATGGTTTTTCAACATAAGAAATATACATACTAGCATTTGAGAGACAAATAATGGGAGACCAAATGAACCAAGAATGA
349	1729	b1729	3	17.652	NA	NA	ABxAC	12.67	3	37	**	39;C/G_100;A/T	AATTCATTCTCTTATCCAGCCCCATATCTGCTTCCAACACAGCAGCTTTTTCAACAAGCAGCTCAGGGTCCCAGCCCATTGTCTCAGGCCCACATTCTCGAGCCCACTGGTGCTACTTCAATGCATTGTTCTTCACCAGAGACATCTCCAGCGTCGACTCAAGACGTTGGCCTCCACCAGTCAAGCCGCCCAGATCAGCCATCCTACTGATCCGCTTCAATCGGATCTGCCCACCACCAC
350	23603	b23603	3	19.075	Fvb0	1853011	AAxAB	1	1	1	-	86;C/T	AATTCCTGGGATCCTTTAATTAGTAACCCCCAAAGTGAACTATGCACCACCTTCTTTCTTGCCCAACCTTATTACTTATATTTTATCAAAATTTGTCTCAACCCATAGACTAATGAACACACCATTTCCATAACCTTGGTTCTACTCAAAATTAACTTCCTATTATTCACCAACTGATCTGGAAGCAGTGATAAACAAACTTGGAAGGTAAGAGACAAGGGAAGAATGAGGAGAAGAAAT
351	43350	b43350	3	19.512	Fvb4	11930085	AAxAB	1.27	1	12	-	98;G/T	AATTCTCCATAAATACTTATAAATAAAAATGATGAACCAATCTCATTGGTTCTCATTAATTAATAAAAATTAGGGAAGATGTTTCACCATAACGATGATCCTCCCAGGCTATAATAGCGTCCCACACTAAGCACCCTACTCATTTATAGTGAGTATCCGCTAATAATAATGGCTAGCTAACATATATATAAATACCGATCGGTTGCCTCCCAAGCTATAATAGCGTCCCACGTTAGGCGC
352	22013	b22013	3	19.607	Fvb3	17438224	AAxAB	0.45	1	3	-	56;A/G_65;T/G	AATTCAAGTCTACACTAAGTACCGACCAAGATTTTTAAATAAGAGTGCATGAGTGTGACACTTTTGGTATGATGAATTTGAGACAATTTTTTGTGGTTACACTTAAAGAATGAGTGAGATTGGCTTTTGCACCCTCTTATCAGTCTTATGTCCCTTCTTCGGTGCCTATTTTTGAGTTCCTAAAACTATTGTAGCTTTTGTAAGGCTCAAAGTATAAATTTACTACCTCAAGCGTCTAAA
353	14732	b14732	3	19.621	Fvb0	1818198	AAxAB	0.58	1	6	-	20;A/C	AATTCTTAGAAATGGACCGTCAAGTGTAAACCATGTCATCTAGTACGACTAGTGCTAATGACTTGTCAGTTTTCACTTTTCAATTGATCCTATTACTTCACACAACGTACCTTTTTCTCCATCACACCATTTTAAAGATCGAATAAGGGGTCTAGGCGCCAAGGGGTGTCCAAAGGTCTCGGTTAATTAAAAGTTATTAGCAAAAATGGGTCAAGAATTTGAGCGAAGTGAAGCAGCCGC
354	19286	c19286	3	19.654	Fvb3	11573374	AAxAB	0.19	1	12	-	60;G/A_167;G/T	AATTCTTCCGAGCAAAAAGCAGCTTTGATCTTGGATTTTGATTCTTTCTTTCTTCTCTCGGTTGCAAACTTGCAATCCCAAATCTCAACCAACCCCTTCTGTTTTGTCAAAAAATTCACATAAAATTCGAGCGCTGTGATGGGGCGTAGCCTCGGTGTGGTGCAGTCGGCCGCGACGGCGATAGCATACAATCTCAGAGACTCATCGAGCTGGTGGCACGACATCAATGACTCGCCGCTC
355	24361	b24361	3	22.711	Fvb3	16907365	AAxAB	2.91	1	57	-	52;G/A_142;T/A_152;G/T_179;A/T	AATTCAATGCTACCTGACCGTAAATAAGTTCCAGTTGCATTCTTAAAGACTCGTAAGGCTCTTCTGTGCAGCTGATGCATACCAGGTAGATTGGTCCCTTGACAAGAAAAACCACCTGAACACACAAATATTCCATGCCCTTTAATACTCCAGAATAATTTTTGTGACGCTGATAAAAAATTTACTGGAAATGTGTAAAACACAAGAAAAGTATGACACATAGATTCACACAAGATTTGA
356	26663	d26663	3	24.681	Fvb3	25744517	AAxAB	0.01	1	32	-	103;G/A_109;T/A_170;G/A	AATTCAGGTTTGCTTCTGAACAGAAAAAGCTTAAGATTATTTACTCGAGTTACAAGATTGGATTGCAGTTTTAGTCTCATTGTTTTTGGTTGTGTAATGACCTGTATTTTATTGTTCAGCTTCTTTGACAAAGCAGCTGTTGTGGAACCAACAGACCATATAAAGGACTCGAAAGACCCATGGAGACTTGCTACAGTTACCCAAGTGGAGGAGCTAAAGTCAATCATAAGGTTACTTCCC
357	26423	d26423	3	27.597	Fvb3	25717997	ABxAC	16.72	3	51	***	58;G/A_91;G/A_127;T/A	AATTCCTTAATACGACATTCTGTCATACTAAGAATCTCAAGTTTCTTCAGATGGCCTAGTATAGATATGTCAATTCTTCTCTTGTTGCAATAATCCAAATACAAAGCTTGGAGGTTGGTCAGGAGACTGAATGATAGAGGAAGTACTGAAATACTAGTACCTCTAAGATCTAGGACCCTTAATGCATTCAGCCATTGGAAAAATGATTCTGGGATCTCTTCTAAGTAACTATTCCCTTTT
358	19647	a19647	3	31.557	Fvb3	27725596	ABxAC	3.49	3	34	-	35;C/G	AATTCCTAAATCTGTATAAGGCTTTCTATGCCTTACCCCCAAATTGGTTGTTGATGCTTTTCCTTTTGGACCATGCATATGAACGTTCTGTTATTAGATCCAATACTTTTTATAACCATGCCAAGCTTCAGTGACTAAGAAGATCGATTAAGAACAGGATTGAAGAGAAACATACCAGGATTCAGTTATAAAACTTTATCGACAATCCAACTTTAAACAAAAGAAGACACAAAACCATTA
359	22042	b22042	3	33.755	Fvb3	27617211	AAxAB	0.37	1	14	-	65;A/G	AATTCCTGCTCTTCAATCCTGATAATAAACAGAAAGGGAGGCTTAGCCTTAATAGAAAATCAATTACACATGTCTTTATACACGGTGGCCAATTTTGAACAAAAGTTCACTTACCTCTTTTCATCGACTCCTGATAACTGTAAACTGTCCAGTTCTGGCATGGGTACTTCTTCCCATGATGGAGGAGAGGAGGATCTAGACTCAGGTTTGTCGGCAGAGTTGGAGAAACCATTTTCATGG
360	6339	a6339	3	35.281	Fvb3	29041068	AAxAB	3.18	1	54	-	26;T/A_71;A/G	AATTCACCAACAAAATCTGCACGGCCTCTATTTTCAACATAGAGAGTTCTCAACAACATAGTGGCTTACTGATATATCTAGGAATGGTGTGATACCTGTGGATCTGTATCCAAACCAAAACCTCCAGATTCTCTTCTGTCTGGCAGTGAACTTGTAAATTGTGTTTATTGCAGAAACAAAATTTGGAGGGTACACAAGTATCATTTCAGATATTTTTCCAGAGTGAAATGGAATGAAAGC
361	8290	a8290	3	41.175	Fvb3	31966419	AAxAB	0.01	1	2	-	155;G/A_175;A/T	AATTCCTTCTCACTATCTTGTACCACAAAATTTAGCTTCTTCACTGCCACTGGGACACCAGAACCAATTTGCAATATTCCTTTGTAAACAACTCCAAAAGCACCCTTTCCTAATTCTTCTGTAAATCCATTTGTTGCTTCTTTAAGCTCTTCATAGCTAAAAGAGCGCAGATTCGAGTCCAAAACATATTGGTTAGACCTCACATGTTTCTTCCTGTAAATGAAGAAAAATCCCAGACAC
362	7259	a7259	3	43.559	Fvb3	32611773	AAxAB	0	1	47	-	162;G/T_190;C/T	AATTCCCCCTCCAAATTTGAGTAGTTCTAGCTCTCAGATCTTAATTTATGCTTATTATTGTAATACTCAAACATTCTGTCTCACTAGTGTCTAGCATTACTCGATAAGAATGGATGTAACTTGTCTTGAATTAGAATGAATACATAACATGATCTTTGGAGAGAATTTCAGAGACTAAATTCCTCATTCACATGATCATTCTCTTACAACCATATATAAACTTGTATTCAACCAAGTTTG
363	7028	a7028	3	0	Fvb3	6329224	AAxAB	0.57	1	2	-	159;G/A	AATTCGCCTACGCCAAACGGGTATGGGATTATGAGATCACCGCACTTCTCTTGGCATTCTGGCTTGGCTTGAGGAAGCGCTGTGGACTCTGCAGCTAGAAGAATTGTGATCGTTGCAGCCGCTATGAAATAGAGCTGCATAATAGTAAGCATCTTCTCAGGTACTAATTAAGGCCATCATATATTTAGTATTGCTTGTGTTAGGACTTAGGAGGTAGCTCTAGGGTAAGTAGTGACTAGC
364	11100	a11100	3	0.187	Fvb3	8533244	AAxAB	0.48	1	13	-	123;G/A	AATTCAAAACAACACATCCATATATAAATACATATAATATATATACACATATAAGACCAACTTAATTTACATTTATCAAATTAATAGTATGCTTGCACAAACTTATTTTATGAAACAAGGATTGCAACAATGCATGGTATATAAATCATAAGGGACAAGCCAACCAACTATCGTCCATTACCATGTGGCATCAACATCTGGATTTGCATGCTGTCATACCCAGTTGTCGTACCAATAGTT
365	4192	b4192	3	7.823	Fvb3	918753	AAxAB	0.43	1	30	-	201;G/A	AATTCAGTTGTGGATGATGTCTCTCTTGAACTTAGTCTTAGTTAAAAATCATTGCCACATGCATGTAATTACAGAGAGAATGTAGAAACCTCCTCAAAAGAAAATCTACCTTTTCCTTTGCAATATTCGATCTCCTTCGGAATTGCTTTAGCTAAAAACAACATTTTCCAAACCAATATTCGATCTACTTGAATTTATGTTGCTTGGATTTACTTAGATGACTACTAATCATTTGATTTA
366	5851	b5851	3	9.232	Fvb3	450707	AAxAB	0.07	1	12	-	10;C/T	AATTCAACTGCAGAGTATATATAAGTTAATAGAGTCAGGCACCAGTAATATCACAGCAAGCTTAGGTTATAGAACTATCAAAAACAGTAAATATCCTCGTATGTTATTGTGTGTGTAGATGATGCTCTATTTCTTTCAATGACTAATATGCGATCATTACCTAAGGCCTCTGTGCCTTTCTTGATTTTAATCTGTATTCTATGTGCATTAATGCAGTTTATGACATAGATCATCTGTAGA
367	3223	b3223	3	9.804	Fvb3	1127683	AAxAB	10.37	1	40	***	120;A/T	AATTCCTGTGATGCTTAAGACTACTGTTGCTCTTTGGAGATATATGCCTAGCATGTCGTACATCTGGGCACCATAGGCTTGCCCACAAAGAGTCTCCACCGCACTTCCCATCCCTAACTAAATGAAAAGAAGAAGAACTAAACATAAGTTTCTTTACAGTAAACCCTTATTAGAGTGTTTTCAAAGGCACATTTTTCTACGAAAACACTTACATATACAACTTAAAGAGCTTAGACATTA
368	34610	b34610	3	10.122	Fvb3	1180494	AAxAB	0.98	1	22	-	80;C/T	AATTCACTAATATAACTTCTGTAATCTTAAGTAAACTAAACCACAAAACCTTTCTCACCAGACATTCACTGTGGCAAGCCCTCTTCAACTTCACTCCACCTATCTTGATCCACAGTAAACTTCTCCTTCATCTGGCCGATAAGCCCCCGAGCCTCAGCCACCTTCCCAATGCTCACAAGTCCATCCACAAGCACCCTCATATTCTCATATTTCGGCATCCAATCCTTCCCAATGCTCTCC
369	31072	d31072	3	12.068	Fvb3	2288951	ABxAC	1.28	3	11	-	91;G/A_128;A/G_216;A/T	AATTCTGGAACAAATGGCACGAGTTTGAGGTCCAACACGGGAATGAAGATACATTTAGAGAAATGCTTAGAATCAAACGAAGTGTTTCTGCGAGCTATAGCCAGGTAAGTTCATCAAATCATAATTGTATCTGTATTACTTTTAAATACCCACAAGCTAGGTAGACAGTTTACACGTTCATTTATGTAATTGCTCATTGCTCATTTCCACTTGTTTATTGGTTGTTCTTGCAGACACACT
370	8064	d8064	3	13.033	Fvb3	2240473	ABxAC	2.16	3	40	-	7;C/T_9;A/G_183;C/G	AATTCAACGAGATATTAAATTGCTTCAAATGTTTGTTTGTTGCAGTGTAATTGTTGAAGCTCTCAAGGTGGACAGTCTGCAAAAGCTGTGCTCGTCATTGGAGCCAATTTTGCGAAGAGTTGTAAGTTATATATCTTTTTGTCGCCTTGTTTTTTGTGTGTGGCTTTTTGTGAAGAAATAGAACAAGTATTGCTTTCATTCTTTATCTTTTTAAAGAAATCCATACCGTTTATTGCTTCC
371	14149	b14149	3	14.032	Fvb3	2662091	AAxAB	1.42	1	26	-	51;G/T_57;C/A	AATTCTTTGGAACTATTTCCATGGAGTAAAAATTACTTGTACGGCAGGAAATAACCCAATTTTCAGAATCAGATTTAGATACCAGTAGGGAAGTTTAGTGGAAATGATTAATAAAATCTTGGGGTTTGAATGAAGACGAAGAAGAACAGAACGTACAGAAATACAATTCAAGGATTCAAGTTAGGCTTAGTCGCTTGAAATGGACATTTCTATTCTCCCCAGTGCATTCCAAACTAGGCT
372	1102	b1102	3	19.635	Fvb3	4510501	AAxAB	2.52	1	2	-	113;T/C	AATTCGGATATCTAACCAACGAGGAGTACGTTTAAGCAGCGCGTAATGGCTACTAGAGCCTATCCGATCCTTGTCCTACTCCAGAAAAGCTACAAGATTTAAGTATGGAAATGCATGTCAGGTCAATCGACTGGTAAGCCTTTATATCAGATATTCTATGCATATAAGTGATACGATATAACTATTCTTTTCCTTATGCCACTTGTGTTGTTCCAATGTACGTTGAGGGTATTGTGGGGC
373	23108	a23108	3	21.337	Fvb3	1069008	AAxAB	2.59	1	58	-	65;T/G_67;T/G	AATTCAATTTTTGATCATGTTTCTTATACTATATTAATCGATCGATCTTATTTTCGTCATTTTTTTTTTGTGTGAATCTAGCGGAACTGCAAATAGCTACTAAGGCAGATGAATCTGAAGCTGTTGAAAAACCTTTGATTCAACCCCTAGTCGAACCATATTATTACATCTTTTGTAAGTTCTGTTTTACAAGCGATCATTCAAGTAAAGGTTGCCCTATGAAACAATATGTATGTCGAG
374	13372	a13372	3	21.629	Fvb3	1113783	AAxAB	9.15	1	40	***	140;G/C	AATTCAAGGTCATGGGTTTGGAACCCAGAATAGGAAACAAGTAGAAGAGTTACTCACAGAGGACCAAGATGAGGAGGAGTTGTAGACAAGACATGGTAGTGAGGCTCAGTCACAGAAACACCAACAGTTTGGTAGTAATAGTGTTAGAGCTGGAGCTGAGAGAAGGGCATTTTGGGAAGAAGAAGAAGAAGAAGAAGCAGAGGAGTGTAGTAGCAGTAGTAGTGGAGAAATAGAAGAAGA
375	43773	a43773	3	22.004	Fvb3	989183	AAxAB	5.58	1	66	*	170;G/A	AATTCAAGGTAGTGTGTATATATATAAGTACTGGCAAGAGCTACTAGCTGAATATCAATCTTCTAGAGCTGTATATGTAGCTGATTAATTAGCTGAAGCTAGCATATATGAAGAAAACGAATCTGCTAGAGATGGACTAGTAATTAACTACTAGCTAGATAGAGAGCTGTGGCTGCACAACGTCTTTGAATTGCTGCCTGTCCTGATACCCAAAGTCTCCTTTATATATAAAAACCAGAC
376	17953	a17953	3	22.637	Fvb3	52228	AAxAB	7.08	1	42	**	38;A/G	AATTCCTAAGATAGATTGGCTTACAAGCCCAAGCATGAATGCCCCCCTGGATTGAAAATTTATTACTTAAACGATATGAAATAATCTCTAGGCTATTCTGCATCAATGAGATAACAAATCCTAATCATAACAAATTGACTTGTAACTATGTTAACCTCTTAGATCCCTTTTGAGGATTTCTTCAGCTGGTTAAATTACAATATTCGAATGGTTTGCTCACTTGTTTTCTGTTAAAAGTCA
377	16772	b16772	3	22.687	Fvb3	6070167	AAxAB	3.24	1	45	-	172;A/G	AATTCATTAATCAAACGAAATGGACATGTAACTATGATATGTGAAAAGCCAAAATATATATTGAACTAGCAGCCTGTCACATGTACAAACTAGACCATAAACCTATATGAGACAGGTGAAACTTGAAACAGAAGTTCCTAAAGTATATTTCACATGACGAGGGTTTTACCTCAGCTCCTAGACAAAAAGGACTTCGTAACTAAGATTATATGTCACCAAAACCAAGCTCACCATCTGCTT
378	39787	b39787	3	25.732	Fvb3	4736400	AAxAB	7.72	1	64	**	55;T/C	AATTCACGACTTTGTTGCTCTTGTTGCAGGACTTGTTCCCCGCCACAAGGACCCGCCACGGTTGCATAGTAACCCATTGAAACCCAGTCTACACCCAGACATTTATCTTCATTGATTTAAAGAGTTAAAGTGACATTACCACTCTGTGTTGTAATATCCATTGATAGGTCTGTGTGTTTGATGTTAAAGTTAAAGAAACCATTCCTTCTAAAGTTTTCATCTGTCATCCTGAGGATGAAA
379	38136	a38136	4	0	Fvb4	3456977	AAxAB	1.5	1	32	-	199;T/A	AATTCGACATAAACCAAACAGTGATCATGAAATGAGCATCTTACCGTGATGTTACCACCCACGTCCGATTTAACCAGGGTCATAGCAGCTCCAAACTTCTCTGCCATCAGAAATCTTGGAAAATGAGTACTGAGAATTATGCTCACAGATGATGTTCATACACACCTAGATTGCCCTAAAACGAAATGACCAGCCCAAATCATGAAAACAAAGAGTGTACCTATAACAGGCAAAATCTGC
380	36034	b36034	4	7.412	Fvb4	7113192	ABxAC	21.66	3	51	***	150;A/G	AATTCCGTTAAGCTGTGTTTGGAGGCTGGGATTGTACTATCACTCTATCGGGCAGTGTAGGAAAAATAACGTGAAAGCTGGGATTTTGTTAAATTTTACTCCTTTTTGATTCCTCTTCTTCAATAGCTGAACTCAAAAGTTCCATCTGGGGCAACAAATTCTTCATCTTAATTGAGTTGGTGCATTTGTTTAACTAAGCTTCATATTCCGTTTCGTTTCATTATATCATCTGCTTGTAAA
381	10200	b10200	4	7.884	Fvb4	9069391	AAxAB	0.83	1	25	-	101;A/T	AATTCATAATGAAATGTTTACATGATCAGTTATCCACATTATTTCAGAAAATACGTTTCATAAACTTTATTGTATGAGTTATGATAATTCAAAGTACAGTAAAATATATGGACATAACAAAGATATGAAATTTTACCAGTCAAACCACAAAATTACTTTATTAATAGAGACAAATGTTTCATACTAAGGAGATTAGATATAAGGACAGAGCCACAAAGCAAAGAGAGCAATACATTAATG
382	11773	d11773	4	8.062	Fvb4	11262305	AAxAB	0.04	1	47	-	56;A/G_74;T/G_130;C/T	AATTCGGGTAGGGTATCAAGAATCTTGTTGGGCAGGTGGCACATATTACTCTTGCAGACAATGGCCTCCAACTGTTTACGTGAGCTTGTTTACATTAGACATTAATGTCCAGTCCGTCCAAACGCCTATCTTTGCATTCGATAATTGACTCCTCTTCAATGCAACAGCCTGTAATCACAAGGAAGGAGTGAGGGATTTGGAGTATTCCTTTTCAATTTGAATTGAATCTCCATTTTGCAT
383	1372	d1372	4	8.981	Fvb4	22977857	ABxAB	1.37	2	16	-	135;G/T_145;T/C_153;T/A	AATTCAGTTAGCCACCCCAAATTGCCACAACGCGGGTTTGCTGTCGCCATTGGTCCAAGTTTCGTGACGGCAACTACATGCCGTGGTAAAAAAATGAAAATTTTGTGACGGCAATGTGAAGCCGTGGTAAAAAATGGAAACTTTGTGACGACATTAGAAAGCCGTGGCACCCTTTAAAATCACCAATTTTTATTTTGTCTCATCCTTTAATCTCGGCCGTGGATTTTATATCTTGACCCT
384	28658	a28658	4	10.909	Fvb4	14724187	AAxAB	4.75	1	43	*	18;G/A_117;C/A	AATTCCATGTCCATGGTAGCATATATTTAATGTCACTTTAGAAAGAATTACCAACGAGATTACCTAAAGGCAACACTAAAATGATGTCAAAGTAAGACAAAAAAGATGTCATTCAAACTTTAACTTTCACAAGAAAAAAAAAATTAGCAAGCATAAATTTAAAATGTTTCTGGTGTCCAAACCTTCCAGCGTTGAAAAAGTCTTTGAGTTCATGATGGAATATCTTGAACTGCTCCACAA
385	31700	b31700	4	11.667	Fvb4	20672352	ABxAC	3.71	3	61	-	154;T/G	AATTCAAACAGAGGCGTACCCTGAGAATACTTCCACCAGCTACACCGCCTCGTATCTCATCAACCTCAAATCCAGGTTTGTTGACATCGAAAGACCGAATAACAATCATATTTGGAGGCGAGATGAAGTTCCTTTCTGGAATTGGGATCTTTTTGACTATGTACTCACACACTACATCAATATTGTATTTCAACTGAGCAGAAATTGGCACAATTGGTGCACCATCAGCTACAGTACCCT
386	18086	c18086	4	13.058	Fvb4	20576604	ABxAB	1.2	2	55	-	36;T/C	AATTCTCTTATTCTATGTCTACCATGATTAGATGATTCTATTATCCCTGTCTACTACTATAGCCTGTAGTTTTGTTCTGAAGACTGTGATTTCATTTGTTTGTTAAAGGAAACTTTGTATGAGAGAAGATGGACGGCAACAAGTTTGCATTGTTGGACTGCAAGAGTTTGAGGTGTCAGACGTACAGATTGTTAAAGAATATATTGAGAGGGGGAACGCTGCTAGAAGTACTGGGTCAAC
387	36357	c36357	4	14.758	Fvb4	25380649	AAxAB	1.53	1	51	-	70;G/C_83;A/G_162;G/A	AATTCAGAGGATTTAATGTTGTAGTTGTTTATCTTTTCTTCTCCGAAAATGGTAAACCGTTGGATCTATTGAATAAAATGGACAGACAAGATAGGGAGAGAATCCAACCCTAACCCACCTCACCTCACTCAATTGACGCCTCCCCAGTCTTTTTGGTCGGTTGACAACTTGTCCTTATCCTTACCACAGAGTATGAAAATGACTAGTTTGCCCACTAAAGTATAGCAGTACCAGGTGCTA
388	36830	a36830	4	16.362	Fvb4	25843264	AAxAB	7.54	1	41	**	213;T/A	AATTCCTACAATGTGTTGGTTGGTAAGGATTCGCGTGCGAATCACCTGGCTGCAAGGCACCGCCTGAGAGAAGATGATGCTGATGCTCAGAACCCTGGTTCCACACCCATGGATTTTACTGCACCAGTTAATGACCGCTGCGCGAAATCACCTGAAGATGGTGGTCAGCCGAAGCCTATACTGAAAAGGAAGGACAGTTCCTCGGATAGCAAGTCTCGGAAACGTGTTAGGTTTGACCCT
389	16795	a16795	4	18.149	Fvb4	25021362	AAxAB	0.57	1	4	-	159;A/G_207;C/T_230;A/G	AATTCAACATAACTGGTTGGCAGATAGACTAAATGTAGTAGTTATTTAGGTGGTCACACTCACAACGTTTATTCGGCAACATGCCAAATATGATCCCTATAGTGCATGCAATGTACATAAATACTATGCATCTACATTCCTGTAATATGGTTTAGTTTAAGAGATTTTGTTTAGGGCCTACATTTCCTGACTCTGTTCATATATTTACCACCTTCACTAAAGTCTTGATCATCTGTACAG
390	33683	b33683	4	18.408	Fvb4	23733793	AAxAB	1.99	1	0	-	147;C/A	AATTCAAATCAGGAATGTCCATGAATCTTGAAAGATTTAGCTAGGCTCACACAAATGAAACATTTAGCCTTAAGACAGTTGCATCCTACTCATGAAAGAGTAACAACTTTGCATGCTTATAAACGTGGGCATCATTTTCGTATACCACTTCTTGTTTAAATCGTTCAAAAAGCACATGTTATGTAATGGAATTTGATCACTGCTCTAGTGCTCTTTCAAGGCTTCATGCATGATCGCTTT
391	30019	c30019	4	19.693	Fvb4	16532033	ABxAB	0.02	2	24	-	134;A/T	AATTCACCATTTTCATGTCCACCTAGGAGGCTAGGAGTAAATGTAATCAAGTGAAGTCTAGAGTTGATAATTTCGATTGAGTTGCTATATCTTAACTATAACAAAATAAGACTACAATCCAGATGGTAGAAAAAATATCTGTTACTTGAGTGTAGTTAGTTAGTAGTTTTATTGGAGGGATTTTAGCACTTTGAGGGCCAGGTTATGCAGCCATGATGCATATGGTATTCACACTTTGGA
392	20708	b20708	4	20.396	Fvb4	25774797	AAxAB	2.05	1	4	-	157;C/A_169;A/G	AATTCTGATATTTAATCAATGTCATTCAAATGTTTCCTGTTAATGCGGATGTCAAATCTGAACAAATAAACTGCCAATTTTCCTCTGGCCCTATAACTTCGAAATCAGTTTATTCATTGTAGCTCCTATCAAGTACTTCCAGTAGCTTCATAAACCCCCCTTAACCCTTATATGTGTCATCATCATTTGAAATCGATTGGATTAGAAGACCTCGTAGGATACCCTTGCCTTGAACTCCAG
393	14398	b14398	4	21.024	Fvb4	25271676	AAxAB	1.6	1	4	-	170;C/T	AATTCTTCAACTTGCATGATCAATTTGGGGAAGAGCAGCTGGGAGTATACATCTCAGATCAGGTTCCTGACATGCTTATTGGTGACCCTGGAAGGTTTCGGCAAATTATCATCAATCTCATGGGGAACTCGATCAAAGTAAGTGCTGGTTCTCAAAAGATCATCTTGTTTTGACTCCCTGGTCAGGTCAAAATACAGCATCTCTTTTGGCTGAAACACAGACCATTTATATTTATGTAAA
394	5567	a5567	4	27.394	Fvb1	18752132	AAxAB	0.49	1	44	-	147;G/A_223;C/T	AATTCTTGTTTATTTTCAATATCAATCAAGTTTTCTTTGACCTACTATATGAAATGAACAGCATTCACTGTTCTTCTTCCTTTAAATTACCCGAAACTCTATATAGCAGTTCTATTGTTTTTCTCCACTTTTGTGTAAACACAAAACGTGTTGCATTAATTCTTGTCTTTATTGAAGTGGATATGATATGAAGAAATACTTTTCATTTCTGTACTTATTGCAACATGTAGTGTTTCTTTC
395	19105	b19105	4	30.491	Fvb4	27149229	AAxAB	4.37	1	2	*	56;G/T	AATTCTGCATATGTGTTTTTTAGTTGAGTCACTGGAAAAAGATAGAATGAAAGAGATATCCATTAGATCGATGAACTATATTTGCCTATCGAGTGTTGAAAAAGAGCTGAGCATGCAAACCATATAGTTGACACATACAAAGTGTCTCTTCCAGACTTCCAAACGTCAAGAAACAACTCCCCCTATATTATTTTCAAGTTTCGAATATTATTGCCACATGCAGAAGATGAACCCTAAATT
396	26219	b26219	4	31.619	Fvb4	28116208	AAxAB	3.77	1	59	-	20;G/C_21;A/G_140;C/T	AATTCATGCATGGCATGCATCGGAGAGCCTGGTATGCTTGAAAGCTGAAACCCCAACTGAAGAAAGTAAAGGTTGATTGTGATGGAGCTGCATGTTTTGCTTGATCGATCGATGAGCTCCTGGAAGTTAGCAGCAGCCTCTATATTTCTCCTTTTACGATCTAAATAATTGCATATTCAATCTGATCTTACGCACCGAACAAGCATATCGGTCACCCTAAAATTGAGGCAACTCGTCTGA
397	22771	b22771	4	34.113	Fvb4	29635810	AAxAB	0.7	1	53	-	38;C/T_123;A/C_237;G/A	AATTCTCTTTTTAGCTATTTCTGTCAATTTTTCTTAATTAGATGGCTACTATTATTATTAACAGAAAGTATAGTGCAAATACCAAAACCTGGTTTCATTGAAATTTTGAAATGAAACAACTACCATGACCATCTCTAAGACCTTATTAACCTCTTTCAATCCGTTAGTACTCTTTCCTATCTATGATGCACGAATGACATTTTCTGTGACAGTAAAGATAACATGTTTTGTAAAGATAAC
398	23624	b23624	4	35.621	Fvb4	30377588	AAxAB	1.13	1	38	-	34;C/T_183;A/G_211;C/G_225;C/G	AATTCACAGAGACAATAAACTTTTGTTGTACCACCCAGTATGAGGAAACTTATATACTTAAACTGCTTTCAACCTCTTTGTACCACTCAGTATATAATACAACAATTGCTGTTAATGTGAAAGGAAGAAACCAAAGACAGATAACATTATGCAGGTAAAGTACTAACAAGTAGCAACAATGTTATACTTTAACAGCAAACAGAAAGTAATACCAGGACTAGTATACTATATAGTACTGAC
399	30379	b30379	4	38.575	Fvb4	30153646	ABxAB	3.06	2	49	-	160;T/C	AATTCCCATTAGACATTTCTTCCATGAAGTACTTCAGTGGAGACTTGTCCACTGAAAACATATCTGAGCCAAAATTTAAATAAAACATTAACCGATTGTTATGAAACAAAGATGAACATACACAGATTGTATGAGTGAAAAGACTAAAAGACTCACAGTTTGGATCTTCGGCCATGACTCGCTGCCAATCCAACGACTCCGTCGTCTCCAATTTCGGAAGCAAATTGCCGTTAGGCTTAG
400	5154	c5154	4	39.902	Fvb4	32172047	AAxAB	28.27	1	38	***	5;A/C	AATTCAACGTTCAATTTTACAATGCACATTTCTTCTTTTCACGGTTGAGCATCAACCGACCAGGTTCACACTATAGAAACCCTATACGAATTTCAAGATCTATATACATGCATGTATTGACAATTTGACAAACTATAGGTACGTAGGTGCGTGTGTGTACGAATTTCATAGAACAAGAATAGGCCCAAGAACAACAGATAAAGAAACCCCCCCAGAGTAAAACTAAGCCCAAATAAGGAG
401	5471	c5471	4	52.876	Fvb4	31674347	ABxAB	38.56	2	49	***	173;A/C	AATTCATATCTTTCACGAGCTAGCTTTCTCTCCAGCATGTTTTATTCTCCATGAACTTGAGCTGCTCATTTCAGATTTACAGGTGGAAGTAAGGGCATATAAAACTTGGGCACGTGTGATAGCGCACTAACCAATATTGGGTCCGATAGTCCACTAGACAATAGAATCTGTTAAGAGGAAAAATATAAACTCTACCGACAACTAGGCATAAAATGATAACATGTAGATTGTAAAATATAG
402	18335	b18335	4	0	Fvb4	3608485	AAxAB	2.98	1	48	-	10;C/A	AATTCAGTAGCTGAATTACTAGCTCGGGTAAAATAGTTTATACTTTTGATGTATAAGCTCCAACGCCTGGTCTGCGATCAGTTCATGGCAAGTATTTATATCCTCAATGAGATCATTAATTCCCTCAATGATGTGGTGCTTAAACTGCCAGCTCCTAGGAGTTTTATCAGCTGCAACAAATTAGAAATCTACATTAACTCTTGAATAATACATACGTATTAAACTTCCTATGTTTTTCTT
403	24858	b24858	4	2.509	Fvb5	28324148	AAxAB	2.33	1	35	-	108;A/C	AATTCTTCTCTCTTGAAGTCGAAAGAAACTATTCTACGATCACATGTCAACCAATGCACAGCTCCATTTGAGCATATCATCAGCTCGTCGTCTATCCAGTTCAACTGAACAGGAGGGAGTGAGGATATTTTTCTCCAAGAGTTTGAACCCAATACAAGAACATGTGCTGTCATAGCTTTGCTTCTATGAAAACCATCTCCATCACTAGTAACACATACAATCTTGTAGGTATTGGTTTTA
404	42123	b42123	4	13.83	Fvb4	15676278	AAxAB	0.01	1	30	-	41;A/T_189;G/A	AATTCCACGAAACAAGCTTTGTTGACGAACTTGAAGCATTGAACACAAGACTTTTCTTATTGAGCAATGATACTTGCTGGTCTTCGATACATTTGCTGCCAATTGCAGAGGAGCAAGTAACGGAGACAGCAAATACCAATAGGAGAAAGCTGAGCATGATTTTCATTGTAGTTAATTTCTGAGACAGCTGATGAGATGATTAAAGGGGTAGTATTGACTATTGACCTATATATTAATCCC
405	20491	b20491	4	14.475	Fvb4	9266408	AAxAB	0.37	1	12	-	152;A/C	AATTCATGAGAGTTATAGGATTAATGCGTGAATTAGAATATCGAAGTAAAACTTAAATTTATGTTCCAGGTTGTACAAAACTCAACCACTTATAGGGGACGGGTTGGTTACTTGGGTATTCTACTACAGCAGCTAGTCGATGATAACAACCAAAAGAAGGCATTCCATTTGGTCAGTTGGTTGTTAGCTAAGCATCGTATTAACTTAAGACATAGAAATATGAGTTGAACTTTTGGACAG
406	36254	a36254	4	17.069	Fvb4	14388489	AAxAB	1.01	1	3	-	10;C/T	AATTCTGAGACACTTCATTCTCTTGTCAAAGAAATTATTATTTTGTTGGGGTTTGTTCTAATTATATGGCTTTGCTACAGGTGCAATTTAGTTTACAACTATCAGAGAAAGAGCTGAAGGATAGGGCTAATGTTGTTCTTCCATTTGAACACCAAGGTGTGAAACCATCAATGGATTCAGTGTCATATTATTAACCTGATCAAATTTGTTATATCTCTTTTCTTTTATCACCATATATGT
407	34774	b34774	4	19.309	Fvb4	15951818	AAxAB	3.18	1	43	-	41;G/C	AATTCTTCATTGGAGGCACTAGAGAAATTGAAAGATTATGAGGTAGGTCCGAACAACTGTATCCTAGCCTTAAATGAAGCTTTGGATCAGTCCCAAAGGGAAATTGCTGCTGCTGCGCAAGCAAATCCTGCTGGTTTGCCTTGCCCTGAGATTGCTTTACTGGAGGGATTCGGTGAAGAACACAGGCTAGTGAAGTGGTGCTTGCCGAGGATAGGATGGAGCTCAGTGGCAAAAATAGAA
408	42892	a42892	4	21.182	Fvb4	17031641	AAxAB	2.97	1	79	-	115;C/T_120;C/A	AATTCTAAACTGGGAAACCTACATGCAACGCAATGCAACAAAACCACATGATCGAACGTCCTCTAGTAGGAGGAGCGACACACCAGCAGCCCTAAAAGCAGCATTCGTATGGTAACAACCCTAGCTAGCTAGGCCATATGCTTTTTTACCGTTTAGGGTTGGTCGTTTACCCATTTCTTGTCTCTCCCACATGGCTTAGCTAGGATCATGCATGATTAGTCGTTAATTAACTAAGTGCTT
409	43200	c43200	4	21.562	Fvb4	20365611	ABxAB	0.26	2	20	-	121;A/G_185;T/G	AATTCTCCATTCCCTATCAATCCAGGTCCTTATTTATTTTTATTTACAGAAGAAACCGCCCGAGTTTTAATTTGAAATTCCAATTAGGGTTTCTGCGGAAGCTCTGAGAATTTCGGGAGCCACCAAAGGAAGAGAAAAATTTTAGCTTTGGGGGGCTTTTATAGTGTTGCAGTGGTGTGGAAGCTTAAGATGGACTTGGAGTAGTACTAGTCTGCCGAGGAGGTACCGTTGTTTTGTTGG
410	31461	a31461	4	22.112	Fvb4	13502361	ABxAB	3.84	2	19	-	14;G/A_104;A/T_142;A/G_220;G/A	AATTCCCAATAAAAGGATCACATACAAACCTGGGTAACAGGTGTATCAGCTTCCAACTCCGTCATAAATGCACTAATAAGTGCAGAATTTGAAACTTTGATCTGACAAGTTCAAGTAAAATAAACATTTATAAACCTTGGACAAACATCAAGTAAAACCAAAAAAGAAAAAGAGGCTCCAAACAAGTCACCATGTGCTACCAGATATAATTGGTAAGAACGAGTAACTTTTTCTAGGAGG
411	31701	c31701	4	23.656	Fvb4	20672352	ABxAB	0.98	2	35	-	213;C/T	AATTCAAACAGAGGCATACCCTGAGAATACTTCCACCAGCTACACCGCCTCGTATCTCATCAACCTCAAATCCAGGTTTGTTGACATCGAAAGACCGAATAACAATCATATTTGGAGGTGAGATGAAGTTCCTTTCTGGAATTGGGATCTTTTTCACGATGTACTCACACACTACATCAATATTGTATTTCAACTGAGCAGAAATTGGCACAACTGGTGCACCATCAGCTACAGTACCCT
412	30264	c30264	4	24.476	Fvb4	19735656	AAxAB	1.03	1	28	-	11;G/A	AATTCACAGCTGTATATTGGGATTTGGTTAAAGTTAACTGCTTAAATATTTGTGATAGATATTAGTATAGATAATTAGTGATCCAAATCTCCCATCTCACTGGCTATACTTATATAGGCATCGAACCTTGCTGGAAGTATGCAGTGATAAAAACGCAAGAGACTTGGTCACAGATGTCCTAAAACTTGTAGTAATGTAATGCTTAAAATTGTAATACGGTGTTGTGAGTCTATGGTAATG
413	5231	c5231	4	24.855	Fvb4	21122692	ABxAB	3.8	2	20	-	197;G/A	AATTCTCAATTTGGAGATCAGTTCAGTATTCAGAATCAAAGAACTGGCAAAACAGTAACTCTTAATTACCAAATGATATTTCGTTTATTTATTTAGAATCAAATCCACTATTATTACATTACAATTTGCCACACATACCCGAAGTGCAATCCAAAACAATCTCAGACAAGAAGAGGAAAAAATAGCAAAGCCACACCGATGACAGAATCAAAGAGCAGGACACAACACTATTATTGTCCA
414	16668	a16668	4	31.545	Fvb4	12922147	AAxAB	1.14	1	19	-	158;C/T	AATTCTTTTTCTTGTATGCTTTGAGTGCACGCTTTGTAATACTCCATAAAATTTCTTTGTTTTATTTTTGAATTTAATGAAGGGATTATTTATGAAAATTATTATTGGTTTATACGAAGTTAAAGTTTCACGTGTGCCGCAACTCTACGAACTCGTATCGACGAAATTATTATTGGTCAGAGGAAGTTAGTTTATGGGTTTGAAAAGTGTATAAGTAGAAAAATGTGTGTGGATTATTGT
415	19653	a19653	4	31.627	Fvb4	23733793	AAxAB	3.37	1	38	-	178;G/A	AATTCAAATCAGGAATGTCCATAAATCTTGAAAGCTCTAGCTAGGCTCACACAAATGAAACATTTAGCCTTAAGACAGTTGCATCCTACTCATGATCATAGAGTAACAACTTTGCATGCTTATAAACGCGGGCATCATTTTCGTATACCACTTCTTGTTTAAATCGTTCAAAAAGCACGTGTTATGTAATGGAACTCGATCACTGCTCTAGTGCTCTTTTAAGGCTTCATGCATGATCGC
416	27133	c27133	4	32.06	Fvb4	24621976	AAxAB	3.17	1	6	-	28;G/T_221;G/A	AATTCAATATCCCTCAAATAAGTTATTTGTCTAAGATTCTACCATTCAGGTTTCAATTTCCCAAATCAACACAAAACTTCCATCAGAGTAACATTGCAAAATAGCTGGCCACATATGAACATTATATGAACAGTTGGTAAATCTCATCCCTAATCAAATTGGAGAAACTTAAAGCTAAGCACATTCTATTTCTCCTTCTTCAACATAAGTACTAATTCCTGGTCATTCAATCATTTCTCT
417	13038	d13038	4	32.918	Fvb7	15802536	ABxAB	3.38	2	24	-	74;C/T_107;A/T_208;C/T	AATTCCTCCCAAAACCCCTTTGCCATCGATCTCTCCGTCAAGGTCCTCTTCGAGCAAACCCAGGGTCCTCTCCTCCAAGCAAATCGGAATCTCTCCTTCAAGCAAATAGGGATAGTTGGCTCTGATCTCAGACTCTCAGACACTCTCAAAGTCTCAGACCCACCACCCCACACGCAAATCTGGAATCTCTCCTTCAAGAAAAAAAGGCCCCAGAGTTGGTTGGTCTTGTTCTTCTGCCAG
418	6245	d6245	4	35.504	Fvb4	27441283	AAxAB	0.25	1	3	-	7;T/C_63;G/T	AATTCGCTTGTTAATTTTGATGATTGATGCTAAGAACGTCATTTAGTGATCTTAGCTGGCCTTGTTGGTTGCTTGTTTGATCCTTTGTAGAATGCGCGAGAGTAAGGTTATGACAAAGGGTAAGAGAAGGGTGCCATTGAAGCGTGGGAGGGTGTCCCCGACGCTTCCTGTTCCAGACGATATTCCGAGGCCTCCTTATGCAGCTACATCTATACTGCCAGAAATTGCCAGTGAGTATCA
419	6218	b6218	4	35.971	Fvb4	26583124	AAxAB	12.12	1	32	***	201;C/T	AATTCAAATACTGGGTTTGAAATTTATGATAGGTAAGATAATAAGGATGAGAATTTCTGATGCAATCTTCAAATACGATGTAAAAATAATGTCATTGAAAAATAGTTGTGTTGTGATGTATCATGATATATCATGTCATTCGTATCATATACTATTAGCAAGTCTTTTACATGGGAATGATGGGATGTGTTGTGTTAAAAGCTGAAACAACTTCTTGAAGGAACTAGTCATACAAGCTAA
420	18043	b18043	4	40.289	Fvb4	27689700	ABxAC	79.1	3	65	***	131;C/T	AATTCTTCCACAGTCTGCTATTATTAGATGTTTAGATACTCCACCACATTCTGGGACTTATTAATTATTATGTTTTTAGATGCACTTTCACATAAAAAATAAAAATTGTCAAATGCACCGAGGACTAATAATAATCAAGTTCTATAATGGGTCAAAGTGGGATTTATTATATTGTCAAGCACTATACGCATTTTAATAATTAAGTTCCATAATAGGATAAGGGAAAAGCTAAGGAAAATT
421	23377	b23377	4	42.52	Fvb4	27903713	ABxAC	40.98	3	27	***	102;A/T_175;C/G	AATTCGTTGTGTTCATATGTGGATGGCAAAGCTTATGGCAAACAAAACCCTCCTTGCCTATAAATTAATTAAGATACCGCACGCTGGTAGCTAGCAGTCCCTTATGCAGATACTTAAGCATGCTAGCATCTGCTAATCTGGCTCCGAAATTCTTGTTGTTTATGCTGTAAATGCAGATGGAACTTGACCGAACCATAAACCGTAGTAACCCTCAACAAACACCAATATATTGCAATGTTC
422	34927	c34927	4	50.16	Fvb4	30045269	ABxAB	2.91	2	4	-	152;G/A	AATTCCATCTATAAAACCAAAAGGACAAGCACGAATGATAAACCTGGGAACTAATAAAGGTATGAACTATATACATACCCTGCAACCATATAGAAACTCTATTCACCCACAATAAAATCTATGCTCTTTTTTTTTTCCTCCCCTCCCTCTCTGTACACAAAAGTTGATGAATGCCAATGGTGCTCATATGAGAAATTGAATGCTTCATCCCTCCCTCTCGTTCTCAAACAGAAGAAGTGT
423	36443	c36443	4	51.279	Fvb4	29623626	AAxAB	16.67	1	49	***	80;A/G_161;A/G	AATTCGTAGGATGCATTCGTATGTATGTAAGCAAATCTCACTATAATTTTTGTCACACAACCAGGTCTCATCTTGAAAACATTCTTCCACCCCTTCTCGTGAGCTGGCACCTCCGTCTTGTTGCCACGTGCATACTTGCTTACTTGGCACTTGACAGCGTCATTTCTCTTAGTCATGCAATCTTTGAACTCTTCCACATTCACCAAGTCAGTCTGATCAAGTACAACAAACAACCCAAGG
424	4419	b4419	4	51.461	NA	NA	ABxAB	5.88	2	40	-	197;C/T	AATTCTCTAGCATTGTCTACTGTCAGTCGTTTTCCCAAGTGACATGGTTTAAGTCTCATCTAGCAACTCTATCAACCTCTACCGTTTTTTGTTTCAAATCATTCTCCTCCCCAGGTTTTACCAGTTCAGGTGATACACGCAATTACAAATAATTTCAATACAAACATTTGCTTCTTAATCACTCCAACCATTCTTGTCCTTGTTACTCTCACTCTCAACCCTCGTAAAAAGAGAGACTTA
425	2080	a2080	4	52.316	Fvb4	31222564	AAxAB	1.31	1	16	-	125;G/C	AATTCAATATCCCTTACAGCACAAAAGAAAATTCAGTAGAAAAAACCCAATCAATAATCTGTACATGGATCTATCAAAAGAATCACTGAACAAATGTATGAAAGAAAAAAGAATGATAACAACAAGATGATCATGACAAATAGCTCGAAAACCCGATCAATGTAGAAGCAGAGATTGATGAGAAAGATTGATACTTGGCAATGTTGCGGTGCTTGTAGAAGAGATCATAAGGCTCCCAAA
426	6374	a6374	4	53.292	Fvb4	32405198	AAxAB	3.7	1	2	-	215;A/T	AATTCTTTGACAGCCCTGTCTCTGGATGTTAGAGTCATTGTGCCATCAAGCCTTCTATATTGTATACAGTACTCGTTCATTGCATTCTCAACTAAATCCAACATCTTAGTCCATTGAGAGAAAATGATTGTTTTAATTGGTCCATCAGTTGGTGAGTTTGAAACTACGGTTGTGTGCTTCACAACATTGACGCCTGAATCTGGGTTTTCATTTTTAAAAAAAGAGTCTCTACTGCATCCT
427	20472	a20472	4	54.533	Fvb4	30400369	AAxAB	1.74	1	48	-	156;T/C	AATTCAGTTTGGAGGAGGAGGATGGGAGGAATGGGAAAGAGGTAGGGAGGCAGCTTTCGTTTTTGATTTTACTCTCGGTGTTCTGTTCAGAACTATTTTTCATTTTATTTCTCCTTTGTTTTGGTTTCAGTTTCAAAATGTGGTTCAAGGCCACAATGAGGGAGAGCATGACTCGATCAGGCTTCTCTTCAAGTCTGCAGATTGGCAAAAATGCTGGTGCAGAGGGCATCTTCTCTTAAG
428	5359	a5359	4	56.335	Fvb4	30890718	AAxAB	0	1	37	-	62;A/G	AATTCGACCTATTGTATTGAACTATAAGTTAGTTTGTCACGAAACTAATAAAGGCCATCCAAAATTTATTAGATACTATTTTCCAAACGACCAATCCAAATAATTTACCAATCATGGCGCATTCATCCGTATCACCCCTGTGAATGCACAAACCCGCGCATATATTATTTAAACTATAAGTTAAACCGTCCCACCAAACTAATAACGGTCATAAACAAACAATTTACCATTAACAACTCA
429	40472	b40472	4	0	Fvb4	58630	AAxAB	0.35	1	6	-	8;C/T_116;A/T_126;C/T_221;T/A	AATTCAAACCTTTTAGCAACCTAAACCGATAAAGCCCGATCTTGACGAAAGCTACATGTGCCTACTCTAATGTCCCAGCTTCAACATGATCCAACATGATGCGTCAAACCACGTCCAAAAACCTACCCTCAGCTGAGAAAATTATAGCCTTCAAGAATCTTGGCCAAGATCCCAAAGTCGTTACAGAAGAAAGTGGCTGCGCAGTTTAGCTCGAAACCCGATAATCAGGACCGATTAGGA
430	17826	b17826	4	0.567	Fvb4	34240	AAxAB	0.17	1	2	-	58;A/G	AATTCAACACTTTGAACTCCATTGGTGCAGCCTCATGCCCTGCTTCACTCTTATCCCCGCCCAAATAGGTTTTGATGAAACTAACCACAGCTCCTCCAACAAATTCCCATTTTTGCACAAACAATATATAGCCTTCCCTCTAACCCCTTTTGTCTCATTTTCAAGCATATCAACATGCATGTAGTCCTAGTCCACAAAGTAAGAATAAAATACCAAGCTAGTCTTTAGGATTAAGTTCCA
431	10693	b10693	4	2.189	Fvb4	2020855	AAxAB	0.35	1	4	-	26;T/C	AATTCTTGAGATTTGTCCCTTAGTATCTGATTCAGCTCATAGATTGCTACAAAAAGTTGAATACTAAATTATACATTACAAGTGATTTTGATTTATTGCTGAAATCTCTCTATTTCAGGAACCTTTTGGGGATCAATAGCAGAAGACGTTGAAGGAGTAGGACCCCCTACAGGTTTTCAGGGTATAAATTCTTACTAATTTACTAAGGAGCTTTGGTAATTTACTAATTGATCTGCATGA
432	34109	b34109	4	14.716	Fvb4	4920091	AAxAB	0.35	1	6	-	231;A/C	AATTCATTGACTCTTGTCAATCTCTGCTACCTTCTTTTTTAAGGTAAATTTCTATAACTCAAATTGTTCTTCCGCATAACTAATTAGCTAAACTTGTATATGATCGTGTATGATTGTTGTTGCAGATTGTCTTTCCATTTTGATTGCCATTGTAGGAATCTGGGTTTGTCAATGGTTATAACATTTTGGGTCTGTCTCTGTTTTTGGATATGATGTTTGAATTATAAAGTCAATAATTAG
433	15525	b15525	4	14.897	Fvb3	28461518	AAxAB	0.85	1	50	-	62;G/T_74;A/G_123;G/C	AATTCTATTAAAATCACACAATTAAGATTAAAGAATCTCCTATGGATAAGCATAGTTCAGGAGATACTCAAAGCAAGGAATTTAAATGACAAAACATAAGAACATCACACAATCATTTGACGTGCATGCAACAATTAAGAACCCTTTTTGACAATCGTAGTATAAAGTAAATAAGGTTTGATCTATCCGGGGACTAAGGGTGCTCCTGTAACAATGGTCATGTAAAAAGTCAGTAGTTAT
434	2135	b2135	4	15.76	Fvb3	28438154	AAxAB	0.01	1	36	-	165;C/G	AATTCCTTCATGTAACCAACGGGTGGTTACTCGATCTCTTACAAGTGTTAGTTCATTGCTTTTTGCTAACATGCTCTTCAGTTTTCGAGCAACCTCATGCGAGAATAAAGTACGGTCTTCAGTTGACACGTTTTTGTATGACATGTCACCTCTTTCGTCAAGTCAGTGTGTTAGTTACTCTCGAATATCATGTAGATGTGTACAATCTACCTTTACTAGCACAGTTTGAAATTTCGAGGA
435	22195	b22195	4	17.457	Fvb4	12335709	AAxAB	2.32	1	48	-	32;C/A_104;A/T	AATTCCATCAGAAGCCAATCACATTCTACAATCAAATTCACAAATCACAGAACACACATCGCATTGAAACTAAGAAAAAAGATTACTCATATTAGATCGTGCTTACTTCTTTGATGATGCCCATATCGAATCCTACCCATATCAAATTCGTGTTCTAGTAGAACATTGGAGGATGACGATTTCAGACTCACCTTGTACATCGGCACAGGCTTGAAGACGTCGAACACTCAAAATTCATGG
436	11230	b11230	4	18.894	NA	NA	AAxAB	1.74	1	16	-	58;T/C	AATTCTGGGATCAGGAACTTCCTCTGAAGGATGAGTTGGAAGACCCTGAGCAACCCTCTGACGATACCAAGCACTAGGATGAGGACCTCCTGCAGAGTTAACCAGAGTGACTTCTTTGTCTCTCATGATGAAAACCTGCACACTAGAGTAGAGAGTGAGATCTGGAGATGAAAAGTGGTGGCGAGAGAGAGACCTTTGCCTGTCAATATATACTGCACAAGTAGGGTTAGAGAAGGCAAG
437	13543	b13543	4	19.668	Fvb4	12333643	AAxAB	1.52	1	34	-	99;A/G_124;G/C	AATTCATAGTGGCATCAAAAGAGAAAAATGTTCAACACTAGGCATCAATCCTTTATTTATATTTATTTCGGCAATTACTTCCACATATTCTTATTGGAAGGCAAAAAATTACACCCACCCAAGACAGAATAGAAACTTGAGAAACATGATGTGCTTAATTCAACAAGACAAAGGTCGGATGCAGAGACAAATGTGCGATATCTGAAGCAACTCGGCAAACCCTGATGATATAAACAATAA
438	10126	a10126	4	20.067	Fvb4	18062744	AAxAB	9.57	1	2	***	14;G/A_119;G/C	AATTCCAAAGCGTAGAGCCAAATTCGCTAGTGAAATTTTCATATTTCTTGTCTCTGTTCTCGGAGACTCCTTATGATTTCCTGCGTCAGAATCGGCTCGTCGGAAGAGAACTATGAGCTGCAGGGAGGCGAGATAAAGAATTGACGCGAGCGAAGAGAACAACAATGGGGCTTCCACAAACCCACCAATTTTGAGGCCGCTATAGAAGACGGTGTGGGGGGATCTCGGGGACTCCATAAC
439	29400	b29400	4	20.262	Fvb4	13400122	AAxAB	0.67	1	49	-	46;G/T_202;G/C	AATTCACAGCTACAAATCAAACATTTTGTGGTAGGATTAATTTATCGTTGCATCGGGGTTGCAGAACCAGAAGGCTAATTCACCCACCTGATATTTAACCCTGCTTCCTTTCTATCCAGAAATGTAGCTAGCTAAGAAAAGAGCAATTTACACTAACACAAAGCTAAACTGTATAGTACTACAGCTGCTACCTTCAATTTTCGGCTTCAACTTTCGCTCAAATTTCTAAACATTATGACA
440	43932	b43932	4	20.476	Fvb4	11506629	AAxAB	0.03	1	23	-	105;A/C	AATTCAAAGTCACCATCAATTTTCATGCCTTAACATATCAACCAAAATACTTTCAAAATTATTTTACGATCTCCTACGATCAAACATGCCCACATACAATACCAACAATTTCCTTCACTTCCTCTCTACACAACTTCACCCCAAAAATTTACTAAGGGCACCCAAAAAGGGTTTCCATAAATAGGAAGTTTCCAAAAAGGGAAAGTTTCCCAAAATAGGAACTTTCCTCACTTAGAAAGA
441	38146	a38146	4	20.957	Fvb4	15804423	ABxAC	6.8	3	14	-	139;G/A	AATTCTTCTTAGCAACTACACACAAAACCGAAATCAAAGCGAAAAACTTATAACAAGCACCTTCCACACCGTGGACCGAATCCCAGCACCATCAGGTATACCCTGTACCGCAATTTTCCGCAACTCACGAACATTTATAGTCTTCTTTGATAGCTACAAACACAACGCAACCACCCCCAATTACATACAAACACATGTGAAGATAGTGAAATACACAGAGCAAGATTGAATTTAAACCCT
442	8526	b8526	4	21.179	Fvb4	14138638	AAxAB	0.01	1	4	-	146;A/T	AATTCCCGATTTGGATGATGAGTATAGTAAGAGCATGTGGAAGATGAGGTTGCTGGTCATGGCTGATGTTTCTGCCAGACCCTTGTTCTTCACCGTCGACAACAATGGACTTGGATTGGAAGCTTGGTGTCTCTGCTTTCGGCTCATGGAGCCTTCCTTTATTCTGCTGCTTAAATTAAAACCTGCAATTACATTGTTAATTAGTAAGTTTAGATTAAAATGTTACATTGGTAATTAATA
443	29585	a29585	4	21.206	Fvb4	15301997	AAxAB	0	1	45	-	71;A/G_174;C/G	AATTCATAGCATCAAGCCCCTCATCTCTTCTCAGATCAGTTGTGTACAAGTAGCATCAAATACCCAAAGAAACCAATCATGGAATATGAATATGAACATGAGTGAGAAAAAAAAGTTCAAATCTTTAGTGTATACAAGCCAATCATTGAAGATGGGTTTTCTCTTTGCCACCTTCTAATTCTGGAGTTTATGCCAAGAAATCCATCCCAACAACACAAAATCAAGGAGACATTGAAAAAA
444	4007	d4007	4	21.223	Fvb4	15017791	AAxAB	0.17	1	2	-	27;T/C_140;A/C_180;G/A	AATTCAATTGATCTTATTGATATCGACTATCGAGTATTACCAAAACCGCATCACTCGTTTATCACTGAATCCAACTTGGAAACACGCACACATCAATCATCACTCATATTTTAGCAACTAAATACTGACCTTGACCAAGAATGAACTTGAAAGGCGTCCCCCGATCACGGCTGGAATCAAGCTTGGTGCCATCAAGCAGAGTCCCAGTATAATGAACTGTCCAAAAACAACACCAAACCC
445	23989	b23989	4	21.585	Fvb4	14018767	AAxAB	8.98	1	38	***	52;A/G	AATTCTTTGGCTAACACTGGTCTTTTTAATTTGTTTTTGTCGCAAGCTCTATGATGAACTCAGGTCTTTTTCTTGTCAGCTTATCTTCGTAGTGGTTATAATTCATGAATAATGAATTATTCATCAGCATTAAAACTGTTATCTAGAGTTGGATTTATTTATTGTTTATTTTTTAGTTCCCTGTATAGACTACAAGGCTAAGTGCATTGTGCCTGTATAGACTACAAGGCTAAGTGTATA
446	30741	a30741	4	21.857	Fvb4	14724187	AAxAB	2.23	1	44	-	134;A/G	AATTCCATGTCCATAGTAGCATATATTTAATGTCAGTTTAGAAAGAATTACCAATGAGATTACCTAAAAGAAAAGGCAACACTAAAAATGATGTCAAAGTAAGACAAAAAGATGTCATTCAAAATTTAACTTTCACAAGAAAAAAAAAATAGCTAGCATAAATTTAAAATGTTTCTGGTGTCCAAACCTTCCAGCGTTGAAAAAGTCTTTGAGTTCATGATGGAATATCTTGAACTGCTC
447	31703	b31703	4	22.22	Fvb4	20672352	AAxAB	0	1	3	-	136;A/T	AATTCAAACAGAGGCGTACCCTGAGAATACTTCCACCAGCTACACCACCTCGTATCTCATCAACCTCAAATCCAGGTTTGTTGACATCGAAAGACCGAATAACAATCATATTTGGAGGCGAGATGAAGTTCCTTTCAGGAATTGGGATCTTTTTCACGATGTACTCACACACGACATCAATATTGTATTTCAACTGAGCAGAAATTGGCACAACTGGTGCACCATCAGCTACAGTACCCT
448	949	d949	4	22.766	Fvb4	17063550	ABxAC	5.53	3	43	-	98;C/G_188;A/G	AATTCTTTCTGAGATGGTACGAAGATCAAATCCAGGTTGCCCATATTTGTTTAATTCACTTGTTCTGGGTCTGTTGGATGACAAAATTTTCTAGAGTTCTAAAAACTTTGGATTTTCTTGACCACAAGAGTTTGACAAAAACAAATTTAATTATGATTTGCTTGTGCATGTAACCTGATACATTGGAGACCATGGCAGAGTTCTAATTGAGAATTGCTTGTTGAGATTGCATTTTGCCTT
449	12223	c12223	4	23.241	Fvb4	19131229	ABxAB	9.03	2	2	*	211;C/G	AATTCCAATAAGCTTGAACTCAATCGAGGGGACTGCTTTGTAATCAATGGCTAATACCCTTTTACATTATACAAATGACCTCAACCCAATCCAGTTCTACTTGACCAAGGGCCATTAACTCTTTTGTTCTATAAAAAAGAACCAATTCAATTAAACTAATATCATGCTCCATCATACTATGCTGGCAGCAATGATGATCGATTTCATACCACAGATTGACCACTGATTAGATCATTGGCA
450	18162	a18162	4	23.794	Fvb1	16790224	ABxAB	6.44	2	2	*	60;A/T_228;T/C	AATTCCTGAAGTACTGCGACTAGACGTAAATTAGCAAGACTAGTAAATTAGCATATTTCCATGGCAAGACCAGATAACCATGACGTCGACCATTTCTTATTTCAAACATAAGGACTACTATACTCGTGCGTCAATTACACAAGAAAGAAATAACAACAATATTGGATCAAATTATACGTGCATCAAATTAACTATATATGATCATGACGCAGCGATAGACAAATGATGTTGCACTACCAG
451	30312	b30312	4	23.813	Fvb4	16000933	AAxAB	10.91	1	39	***	210;A/C	AATTCAGATTTTCCATCGCTCGATTTCTTGTCCTTCTTCGTTTTCTGATCAGTGTTTTCGCTCCGCAGAGATCAGCTGACGAAGGATGACATCAAGGTGTACGCGGCGGTGTCGGAGAAGCCAGGGAGTTCCTTCCCCAATGTAGGCAGGTGGTACGACAGCGTTTCGTCCCATCTCGCCAAAAGGTTAGTTGGATTTTCTATTTGTTTAATGTCTAAAGATTGTAAATTTGATTGTTTT
452	23152	c23152	4	24.339	Fvb4	20709176	AAxAB	5.15	1	51	*	23;G/A	AATTCAAGTTAGGGTTTAGAGATGACTCAGGTAAGTACACAACTATATATAAGATCAATCTTAGGATCATTGACCTGAAGGGTAAGGAAGTTAGGAGGTGACTATAGTGATGCTAATGCTAGTGAAAGAGCAACTTACACAGGGTCAAATTAAAACAAGGCGGGCGGGATAGGGAGAGAGAAATCGATCTAGCTCTAGCATCTAGGTGGAAGACCACCCACAGAGGCAGCGTGCATGCTT
453	1660	b1660	4	24.768	Fvb4	20926106	AAxAB	1.09	1	53	-	205;G/A	AATTCACTGAAGCTATATTTTTAAGTGAACGTGTTGAACTCGAGGTCAAATTGTTGAGGTGAGCAAGGTCCATAGCAAACCACACACTGAAAAGGAACAACTGAACAAGCAGGGTCGGCAAGATTAAGGCTCAGGTTATGCTTGAAACCATTTACAAACCTACTGCTCAGAGTGCTCGCAGTGTTGCCTGAGACCACGACGCGACGCTTTATATAGCCTCGAACAAATTGAGAGTCACGT
454	6893	a6893	4	24.772	Fvb4	22681258	AAxAB	0.01	1	4	-	126;A/G_127;G/A_193;T/C	AATTCTGACTATCACTGCTACGTGTGCGTTATACTCTTTTCTCCGTCGACCATGATTGTGTTTGTCCCATAGGGTTTTTATTACCTGACAAAATTTTGACTAGGCAACACTGGAGCACATATCAAAAGAAGCTAATAACATAGAATACTCAAGGGTTGTAAATAGTTAATTTAATGGGCATTCTTGTAATTAGTCATATAAGATTGTTATTGTAATTTATACTATGATCTCGTCTCTTAT
455	24261	b24261	4	26.359	Fvb4	22531223	AAxAB	0.06	1	4	-	147;C/A	AATTCTCTCAAATCATCTAAATTATCAGAAGCAACAAAATTGAAAGAAAAATAGACTAGTTTGTTATGAGTAAATTGAAACCTTGGCGTAGTAATCCTTCCAGACTCGGCGAGCGATCTGATGGCCACCCAAATCAAAAGCCTTGAACTTAATCTGGCCTATACTCAACTCCTCGGAGGTCGGGTACTGAGTCGGTTGGTGCTGAACTAGTCTCTGCAGAAATCAATCAAATCAAACAAA
456	8769	b8769	4	26.926	Fvb4	22237263	AAxAB	1.41	1	43	-	31;A/C_239;C/A	AATTCTTAATGAAACAGGAAAATTATTTGTACGGGTGTTCTTCTGCTTAATTTTCACTCAATTACGTACATTTGATATTGATCGTATGAAATGTATACATTGAGCTAATCAAATATAAATTATATGTAATTTTTTGAAGCTAGGTTGGTAGAATAAACTTGGATGCACAGATAGATGACTTTACGAATACCAGGCAAGACATTATCTCAAGAATTGGTCTTCCTGCAGCTGTGGAACTAA
457	42423	b42423	4	27.594	Fvb4	22197945	AAxAB	0.18	1	4	-	103;G/C	AATTCGAGTCTGTCATTTGCAGGCTGTACAAACTTTTGCTGCTGAGTATCTGAAAACTCCACTTGGCGAGCCAGTGAAGGGTAAAAAGAACAAAACCACCACTCAGCTATGGGTGGAGAAGTTTTACAAGAAAACCACTAACTTGCCTGAACCATTCCCACATGAATTAGTTGACAGATTGGAGAACTTCTTAAATGTAAGTGACACCCCCCTCCCCTTTCTTAATTTTAGATTTTCATT
458	37541	c37541	4	29.75	Fvb4	25620546	AAxAB	1.85	1	67	-	60;C/G	AATTCATTAAGATATTTGTAAGTACATATATGCCTTCTCTTCATTTCAAGTTCGGCTTTGCTTATGTATATTTTTTGTTTCCGAATAATTAACTGTACGTTATTCTTCTACTTGCAGGAGGGTCTTTCACAATAATCTAACTGGGGCTATTCCTTCATCTCTTGGCAATTTGACTAGTTTACAAATTCTGTGGGTTACCCTATACAAAATTTGCGGATTCTATGCTGCATTACTCTTTGA
459	30009	a30009	4	31.902	Fvb4	25349356	ABxAB	7.51	2	4	*	18;A/G	AATTCTAGATCGTACTGCATGCTACTCTGCTAGCATTCATCGTCTGAGGATCGACGCCTCCAAAGGTTGATGATCCATTGCATATATTCTATTCGTCCCCCTTGAACTTTTACCTATTTCGCTGTGATGCTCACATATCTTGATAAATATTGGCTTTGTAGTAGAAATGATAATATCAATATCAATGGGTAATGCGCCGTAAAGGTTTCTCTCAATATTTATCATAGAAAAGAATTGTGA
460	40842	c40842	4	32.643	Fvb4	27156010	ABxAB	5.21	2	14	-	12;T/C_23;A/G_126;A/G	AATTCAACAAACTTGAACTAGAGACCATTGATATTCTAAACTCCGATCTTCTACACAACACTTTATTCTATATCTGTATGGGACTAGACTTTAAGCAACTGGTGAACAGAGTGTGTGTAGGGACCGAGTTTATATAAGATTCAACTAAGGCTTAGGCTCCTCTCATAAAAGGAACCAATTAGTAATAGAATCACATATATCCTTGATTTGTATATCATTTATATCATTGATCAATCACCT
461	9990	c9990	4	33.207	Fvb4	26751546	ABxAB	8.35	2	3	*	124;A/C	AATTCCTGCAGTATCTCAAACTTTATGGGATAAACTATTGTGTCGGCGAATTAGCTGGTTAATTTTCAGGAGTCTTTAGGTAAAAGATACAGTCGCACCTAATAGGGATCAATATACAACTGGCAGAGATATAGTTCGTAGGGGTTTTGGTCAAGAATGGCTGGTGAGGGATGACCAGCAGATTGGTGGCATTGAATGTGACTCATAGGCTCATAGCAGTAGGTGTAAAGTTTTAAACTC
462	41461	b41461	4	33.409	Fvb4	25465550	ABxAB	10.59	2	13	**	33;T/C_66;T/C_99;C/T	AATTCATGATGGACTAGGGACATCGTGTATGAATAAGAGCGCTGTTAAATATGAATCCATCTTTTGTTATAAAGATCTGTTGTGCTTTGTACTTGTCTACCTTATATTATATCTCATGTAATCTCAGAGCAAGAGCTTCCAAATTCCAGACAATATTGAGCTGCCAAATATCAGAAAACAAACGCCCAAATCAGTTGCACAGTTGCAGGTCCCTTTTCAGTTTCAGAGGAGTGGGTCGAC
463	37601	c37601	4	33.829	Fvb4	24402194	ABxAB	4.86	2	6	-	14;C/T_205;G/A	AATTCTTTATCAAGCCACCATCTTCAGTTCCCTAATTCTCTCAACTGTGATGTCTGTGCAATACTCCACCGTCAGCTTCTTTAAGAGGGTAGCTGTGGATAGTAATCAGGTTGGATGTGACTTGCTTAGGGCTGGTATTGTAGAAGCTCTCGGTTGGTAAAACCGTAAAAGCCATAGTACATAAACGGTGAACCTCGATCTTCCTGCATTAATAGTATTTTGATACTTCAGGTTTCATTT
464	27644	c27644	4	34.606	Fvb4	24472042	ABxAB	29.6	2	39	***	88;T/C	AATTCATATATGCATTTGCCTTGCCTGTTTTCAACTTCTGGGTAGTTTGTTGTGTGTTTAACTCAACTTGGTTGTTAGACGTATTAATTATTTGAGAAGAAGAGTAAAGTTTGGTGTATGTGCGTGTTAAGTTTAGTAATGCTATCCTTACGGGCTTTGTAGGTGAGAAATTCTGAAACGTCATACACATTATAAGTTCATAGCAATTAAGTTGCCAATTCTTCATCTCCAAAATTGCAG
465	37028	c37028	4	35.303	Fvb4	24754655	ABxAB	1.83	2	49	-	29;C/G	AATTCTAGATAACTAGAATATTGATTGGACATTGCAGGATGAAAGATGTGTTGTACATCAAGATTCATAAACCTCAGTCTCATTGAGTCATTGGTTCAAGGGTACGATGAACTCAAAGAAGTAGCCAGGCCGAAGTCCAAGCAGTCTCAGCTCATAATGCAGAAGAAACCATGTATATATCCTCCTCAAGTAGCATTGCCTAACACTACCAAAGAGTGCTAGCAAGGAACCAGTTCAATT
466	15719	c15719	4	36.054	Fvb4	24069807	AAxAB	0.33	1	37	-	130;A/G_171;C/G	AATTCTAATGTAAAGAAGCTCAACCATTGTACCAACCATGTAATTGGTGATAGTGATCTTATGTAACTAAATTGCATTTGTAGATAAATATGAGTGAAGAGTATGTCATTCTATGTTTCTGAATGGCTCTATAACTAATTGTAAAAATAAGAAATCAATCGTTTTGAATTTCTTATTGATTTCGTAAGCATTGAGCGACACATTACAAATTTAAATGCTAATTCATGTAGTCTTAACCCT
467	31303	c31303	4	38.555	Fvb4	27882889	ABxAB	19.9	2	19	***	15;A/T	AATTCCACTATAATCAAGTACCTGAAAGAGCTACCACGTCTGTGACTGAAAGGCCTTGGTACTGGAACTTGGAGATGATAGACAGAAGGCCTTCATCTGCAGTAGGAAGGTTGGTTTCTGCAAGTTCAGGACTAGCAGTTATAGAGTCCTTTCTTCCCAGAGGAACATCCCAATAAGGTCCGCCAACCTGAAAAGTCAGATCAGTTAAAAACTCTTGCATGAAAAGAGACATCAATATGG
468	8577	c8577	4	39.628	Fvb4	28001513	ABxAB	4	2	49	-	204;A/G	AATTCAAAAGGACTTATAATATGGACACTGTGAATCCAAGCAGTCCAAGCAAATCAACTTTCGGTTTCTGACTTAAACTATTAACATCATAAACCAACAGCTTTCCACAAACTAGAATGCAAATTCTAGCCAAAAGTTCATACTTCAGCAGACATGTGACCAACAACATAATTTCTAACTCCATAAAAGCAACAAAGCAAACACAAATACAAGCACAATTCTAACCCACAAACCTCATTC
469	7366	c7366	4	40.331	Fvb4	28114046	ABxAB	6.57	2	2	*	32;A/T_69;T/C_174;A/T	AATTCTACTGGGTTTAGATCTGATCAGTTTGTATGCCTGACAACGGGAACTGGGAATCTTGTAAAGGATTGGAGGTCTTTGATTTTGAATATTTTACTAGTTTGTTTTAGCTGTTTAAAGTCTGTGGAGGCTGAGCCTCCCTCAAAACTGTTGCAACCTTTTTTCTGTTGTCTTATTGTACAGTTGAGAAGTCTCTCACTTTCGACTCTGTCTACCACTCTCTGCCAAAAACAATTTCAT
470	21716	c21716	4	40.576	Fvb4	28059391	ABxAB	6.57	2	2	*	6;A/T_53;G/A_128;A/G	AATTCCAAGTCCTTATTCATGCGTAGCATATTACGTCATTGTTGCCAGCTTAAGTATTCGAATCTATAAGAACTCACAATCGAACATGAAATATATATCAGCAGAGAGCAGCCAAAAAGAAGAAGTTAACAAAACTGAAGATGACTTCTTTGGGAGGCCTAGTAATCACGCTTTCAGGCTTTGTGTTTCTCTACCTTCTTCTTGTAGCTCTCATCAAGATCTTTTACAAGCAATGGTGGA
471	32378	c32378	4	41.009	Fvb4	28431487	ABxAB	5.66	2	3	-	68;C/T	AATTCTTGAGGCTCTCTCATTCTCTGACATTGCAGGCCAAAATGGGGAACTCAATGACATGCTTCTCCCCAGCACCAACGAAGCTGAGCACCAACTTGTCAAGAAGACCCTCCAAGAGGTCACCCTACTCTTCACCTTTCTTTGGCTCCTCAGCCAGTACTAGAAGAACAAAGGGCTCCCCCAAAAAGGTACAGACCCTTGAAGATGATCTGATCCTTCAGCAACAAGCTATCGAGGCGG
472	7397	c7397	4	41.155	Fvb4	28538529	ABxAB	6.83	2	1	*	26;C/T	AATTCACGCAGCTTTGGTTCTGCTGGCTGATATATTTCTACTAAGTAAATCGAGTTGCCTTCAACAGTTGGGAAATTCCGAGTAGACAATGACATTGCTGTTTCCTTTCCACCAAGAAATAGAGCGCGGCCGATCAAACTTTCTACCTTTTTCCATTCTCTATCCTTGAAAACTAATCTGTAGACATACAAGTCATCAGGTTTTATCCTTGAAAATTGCTTCACATACAATATCTCACCT
473	36315	c36315	4	41.235	Fvb4	28540099	ABxAB	8.53	2	4	*	210;G/T	AATTCATAACATTTCTATACTTTAGTTGTGTTACTGCTCTTGATGACATGATAGCTCATTTTCTTTCATTGTTTGGTTGTCCATAGATCTGCCAAAGGATATGGAAAATGGAAATGTTTCGGCTGAGAAGGCGAAGGCTGGGACAGCAAATTTTCTTGTACAGCTAGAAAACAGAAGAGCAATTAAGGTTGGTGGTTTTGCCATCCATGTGTGTATCTCTTTTTCTTTTGATATTGAACA
474	27618	c27618	4	46.335	Fvb4	29411853	ABxAB	4.59	2	38	-	74;C/G_158;A/T	AATTCCCAAACGAAATAGAGGTCCTAGATTTAACCGTCATCTCACCATATGAAATTACCGAAAGTAAGAAGAATCTTATGTAATTGTCCTGTTTGGTGTTTAGTTACGTACATCTCCGTGATTCCCATTCCTACTATCTCAAAGATTCTATTCTATTTACGTCTCTGATTTCGTACATCTGCAAAATCCCATTCTAATTTGGTCTCTGTCGGCCATCCTGAGTACTTCTTTCATCTCCAA
475	15569	c15569	4	48.47	Fvb4	29816896	ABxAB	8.14	2	19	*	44;T/A_151;T/C	AATTCCACACTATTCATTGTCTTGTTTCTCAATGCTTTTTCTGCTGATAAGCTGTCAGCCTCGTAACTTATTCAATTCTCTGAACTATTTTCTTTTTGATAGCTTCAAAGTCATGGTGTGCAACTAATTACTAAAATTGTTATCTGCTTTATGCCGAAAAAAAAATATATTGTTATCTGCAGTGCCTTATTTAAGTAAGAATGACTACTTGTACTCCCTCTGAAGTGGTCGCCTGACCGA
476	6325	b6325	4	0	Fvb4	25669230	ABxAC	2.24	3	45	-	12;C/T	AATTCAATAAACTTACTTTTTAGTAGGATCTATAAACATAAACTTATATGCGAGCACACAAAACTGAATAGAATTAATGAAAATGACTACATGAGGCAAAATGACATGAACCAAATAGAAAAGAATGGGAGAAAATGTTTTTCTTTATTGTATGCATGTTCTCTATGCCTCTAGACCAATTGGTTCTAAGCTTATTGTACACATGTTTTAATTGTCACTCGATAATGTCAGTATCTTGAA
477	15320	b15320	4	0.518	Fvb4	23733793	AAxAB	12.12	1	32	***	41;A/T	AATTCAAATCAGGAATGTCCATAAATCTTGAAAGCTCTAGCTAGCTAGGCTCACACAAATGAAACATTTAGCCTTAAGACAGTTGCATCCTACTCATGATCATAGAGTAACAACTTTGCATGCTTATAAACGTGGGCATCATTTTCGTATACCACTTCTTGTTTAAATCGTTCAAAAAGCACATGTTATGTAATGGAACTCGATCACTGCTCTAGTGCTCTTTCAAGGCTTCATGCATGA
478	20304	b20304	4	0.611	Fvb4	24223896	AAxAB	0.01	1	44	-	6;T/G_22;T/C_63;G/A_139;T/A	AATTCTGAGCCCAGTTTTAACTCGTTTGTTAGTTGCAACTTGCAACAAACAAGCACCACTTGGAAGGGACAATGCAAGTTTGAATAATTTATACAAGAAATGAAGACGTGCTGCGGTTTATCTACGTTTTCAAATTCTCAGTTTTGAATCTCATCGTTTATGTATATATAGCCAAAGAGAACATCATTGATCGAGCATGAATCTGAAAAGGAATTTAGTCGTTGTTTCTAATGCATGCCA
479	7001	d7001	4	1.434	Fvb4	25474624	AAxAB	2.78	1	1	-	160;G/A_198;G/A	AATTCCTTCCCACAATGCTCGTCATCCTCATGTTCCTAACCAATTTCATGTTTCACATTTGGATGCAATTGAAGGACACTGGCCGGAGAAGAATGATCAGCTTGAGAATGACTGGATGGACGCTCGGTTTCAGCAGCTGCATATAAATGCTGAGAGGCAGAAAAGGGAATCAGAGATCAAGAATACTTCTCAGGATCAGAATTTATGGATGTCAGATGGATTTAATGATGAGAACTCAAA
480	3901	a3901	4	1.632	Fvb4	25465550	AAxAB	17.09	1	56	***	174;C/T	AATTCATGATGGACTAGGACTTCGTGTATGAATAAGAGCGCTGTTAAATATGAATCCATCTTTTGCTATAAAGATCTGTTATACTTGTCTACCTTATATTATTTCTCATGTAATCTCAGAGCAAGAGCTTCCAAATTCCAGACAATATTGAGCTGCCAAATATCAGAAAACAAACGCCCAAATCAGTTGCACAGTTGCAGGTCCCTTTTCAGTTTCAGAGGAGTGGGTCGACTTCTGAAA
481	1899	b1899	4	1.658	Fvb4	24570455	AAxAB	2.04	1	49	-	101;A/C	AATTCATCGACTGCGACGACGAGGGAGTTTTGTTCTTAGAAGCAAAGGTCAAAGTGAAGATGTCTGAAATTCTTGATGATCCGAGACATGAAATCTTGGACCTTTTGTTTGCAGACAATTTGCAGTGGAACGATGCGAGTTTGAGTACTTTACTTGCAGTACAAGTCAGCTACTTTGATTGTGGAGGAATGGCATTAAGTGTGTGCATGGCACACAAAATTGGCGATGCAGCAACTTTGG
482	19980	c19980	4	1.892	Fvb4	22540431	AAxAB	15.8	1	28	***	99;A/G	AATTCTTAGCCTCAGAATCAAGTTCTTCTGATAGACGCCAAGGAGCAGATGGATCAGAGACAGAACTAGAATTTGAATTGGAATTTACAGGAGTTGCTGAACCCTGCACCTGTATCATAAATTAAAAACATACCAGCGTAAGGTAATAAATTAAATGATTACTGAAAAGAATGGCCCAAAGCATTTGATTAGAGATTGCTAGGTTCTACCGCTTACACATAAAGGTGCACTATGTTCTCA
483	13059	d13059	4	2.302	Fvb4	22276188	ABxAC	4.58	3	8	-	74;C/A_147;A/G	AATTCCTAACTGGCTGAGTAACTTGATAGTGTTTATATCTAACCTATCTGCCTAAACAAGATAATTGGTTATAGAAGCGCTTCACTACTGTTCTTTTAACAAAGCGTTTCGATTACTTTTGCAGAAAACATTTGTGATTGGAAAAAGAAAAGTATGTACTTCCAATGAAAATGATTTGCAGGAAAACTACTCCCTACAAAACAGTTAAGCTATAAACAGACGTGTGATCCATGAATATCT
484	43592	d43592	4	2.488	Fvb4	22668081	ABxAB	4.82	2	9	-	8;A/T_47;T/C_225;T/C	AATTCATCAAATGTCGGTAAACCTATGTTCCCAATGGGGGCAAGCACTGATCAGGGGCACATGCAAAATACTAGTCAACACCTAAGCAACAATGTTATTGTTGACAATACAGTTCGGATTAAATCTGAAGGGCTTTCTGATGCATCTCAAAATAGCTTCTTTCATGATCAATATGGTCAGGACGATCTAATGAGTGCACTTCTCAAACAGGTCTGTTTATCTTCCTCTATTACTTTTGCC
485	18280	a18280	4	3.491	Fvb4	20625503	ABxAC	2.01	3	44	-	138;A/T	AATTCAAAAATACTGACTGCCACTAGAACAACAGTTTGAAGAACTACTGATGAAGAAAGATATGGAACTTACCACTGAAAGAGCTGAAATTGCAGCTTTGCGAATGCTAACAAGTGGATCAGAACAAGCCATGCCCATAGTCTTGATCAAGGCTCTATCAAAACCACTACCAAGAATAGCCATCAACTTGGTAACCAAAAGAAGTGCAGCTTTCCTTACAGCTACCTTCTCATCCATACA
486	43006	b43006	4	3.926	Fvb4	23507449	AAxAB	2.08	1	6	-	36;G/A_161;A/G_165;A/T_206;A/G	AATTCCTCCCTACACACAGCTACATCTAAACGGAATGCGCAGCATTCTGATTTCTGACTTAACAATATTATACCTCACCTAAAACCTCTTGACCACTACTCTTCAAGGTACTGGATTGCAATTATAGTATCGAGCTTCAATTTCTTGGAGTGAAAATGTCCAAATATCAATCAAAAGGGTTTGGTACGTACGACTATTATGAGTCTAGTATTGATCATCCCACCACAAGGCAGCCATGAG
487	26357	a26357	4	5.021	Fvb4	19244446	AAxAB	0.7	1	3	-	21;T/A_112;A/T_205;T/A_239;A/G	AATTCAAGGGTGTCTATAACTTGGTTTCATGAAATAATTTGTTTGGGACAAAGCCAATGCATGACACCAAATGTTGAGCCAATTCCATTCTACACAGAACCAAGACGAGATAATTCATAATCACCCAGCCAAGACAAGACATTTCATCTTGATTATAAGAAAAGATAATATTGTAGGTTGTCACAAGTCACAACAAAGGAAGAGATATTTTATCATATTGGCCAAACTTAATCATTATCA
488	8681	b8681	4	5.198	Fvb4	27216035	AAxAB	1.42	1	60	-	5;T/C	AATTCTATCCCTTTATATTATCGTTTGTAATTTCTTCTGATTAATAGTGTGGAGAAATATGATGTTTATGTCAAGCACTGTCAATTAGTTGCATAGAATGCTTGAAGTGTCAGGTAATCTATTAACCCCTCGTCTTCACTATATCAGAAGAACAAGTAAGACCAAAATCACTCAAGTCTATCTAAGAAAACAAAACTCGCAGGCTGTTGACAGAGACAAAAGTCCTAATAAGATTATTGA
489	27408	a27408	4	8.6	Fvb4	24175297	AAxAB	1.61	1	40	-	81;T/A_145;T/G	AATTCTAGGATCCAATCTATGCTGTTGCTTCCATAGATGCAAATATTTCTGTCTTCTTCTACCTGAAACCAGTGCAATCTTTGCAGCTTAAGAACACCCCCAAAAGAAGAAGATATTAACCGAGTATATATGAAAGAACAATGAGTCTTCATAGTTAAGAATCTTACCCACTTGGTCAAAATAGGGTCAATTGCATCAACCATAAATTTCAAGGTCCAGTTCTGTTCTTGCCGAAGTTCT
490	6126	a6126	4	8.719	NA	NA	AAxAB	0.59	1	8	-	222;C/T	AATTCTCCAGGCTAAATATGGATAATATCAAGAAACCGAATCGTTTTTATTTCAGACTGACTTCAAATTCGCTATGAGGCATAACAGCATGTACACTAGTGCAGGAGCAAACAATGGAGACAAACTTTGTAGGACCTGCCCTGCATGCTGTTTGCTTAACCCCAGTTGAGACAACATGTGACAGGCATGCAATATATTGATATGCAGATCTGATAATTCCTTCTTGTTGGCAGTAAACTT
491	37980	a37980	4	14.526	Fvb4	27289439	AAxAB	1.61	1	23	-	184;A/T	AATTCGGGATCCCACCTATGAATTAATAACGGGTCTTCTGCATAACAAATATAGATAGATGTAACAGCACTTTCCACAACCACCATTGCTATCCCCACCTGAAACATTTCATGATCCATGGTATATTTTGTCTATCAGATAATAGTACTCCAAACAAAGCTCTATTTAGTGGTTTAGGATAGACAACCAAGAAGATAAACTAGTCAACATGTTATCTAATACACTTGAGGCCAACCCCAG
492	13134	b13134	4	15.384	Fvb4	29583023	AAxAB	24.05	1	57	***	17;G/C	AATTCTTTATTTTCTTGGTGATGAGTTGCTGTTTCCTAATAGCTATATCCATTTTTCTGAGTGAACTTGGAACTAAAGTCTAGCTTGATTAATTCCATCTCACCCGCCCATGTCTTGATTCCCTAAAACTAAACGAATTGTTGTGGATTCCAAATGATTTGTATAATATTATGAATCGCCGTCCAAGTCTACCCGATTCAGAAACCCCAATAATTTACATAAACAAACAAAAGTCTGCGC
493	6785	a6785	4	16.583	Fvb4	29211473	AAxAB	0	1	1	-	175;T/C_238;A/G	AATTCTTGAATAGATATGGTTGGTTCTAGCGTTTCAATTACCACATCTAAACAACTACCCCATTACAGAAACTCGCTGATTACAGATGCAAAAAGGATGATTACACACCATTGCAGTCATATTCATAAAGTAGTTGGCGTTAAGTGTAAATCTCCTAGAAAAACAGCTACAGTAATCACATTCAACACAGCAAAAGCATGAGGCCTAGTATAGTCTTTAGGCATAACGCACGTGAAAAAC
494	23286	a23286	4	17.704	Fvb4	29263021	AAxAB	4.57	1	66	*	78;T/A	AATTCTCTGATTGATATTTATATAGCTAATTCTCGAAAGATTTCTAATCTGTTAGACTAACTAAGTTCTGCTTATGTTTACTATCTACGTCTCAAACAGTTGAAGGAGAAGGCTGAAAGAATGCCAGAAGGACATGCGACAGGTTCAACTGCTTGTTCCATCACTTCTGTAAACCAGTTGCCCAAAGATAGCCCCCAGACAAATATGATTACTCCTCAAATGGGGCCCAATGGGAATTTA
495	41415	b41415	4	18.003	Fvb4	32484863	AAxAB	0.03	1	3	-	182;C/T	AATTCTGGTCTCCAATCCTGGATATCATCAAAATAAATTCCTCAAACTCATTGGCGCCGAGCGTGAGGGACCTGTTTTTTCATCAATTAGCCCCAAATTTGCCTCTTATCTCTGAAAAAATTATTTAGTAATGAGCTTCAATTACACACACCACACCCACAATGCAACAAAACCAAAACAAACATCTAGTTATTTCAAAAAAAGCATATTACATATTGAAAAAATGGAACATGTCACTCT
496	24541	d24541	4	18.235	Fvb4	30457744	AAxAB	0.96	1	41	-	211;T/C_220;G/C_233;G/T	AATTCATTAGTAGGGTTTGTTGATCGGAGCTCTTGAACTTGATTGACTACGAATTGGAGCTTGGGATTGGGAGCTAGGGTTTGGCTGGAGATGTGAAATTGTGAAATGGGTATCAGAAATGTGGGGTTTTTGAGGAGGATGGGATATGTTTTGAAAAGCTTGTGCATTTTGATTCAGCTGCGCGGTTTTTGGCGGAAAATACCACCCGCCTCACTGTGACCTCTCGCTGACTGGAGAATG
497	5242	b5242	4	18.648	NA	NA	AAxAB	5.17	1	4	*	5;A/T	AATTCAATTGGTGTACAACTAGTAGACTAAGAATCAAACAATAAACTTACATCTGATGCTTTTGCTGGATTGCTTGAGGTCCAAATCTTTTGTTTGCCCTTAGAGTTGGGGCCATTTCCAGCTTAATATTTGCCACTAGTCTCACCAACAACATAGGTAACGTCAAATGGCTCCGACTTGTTCTTCTCACTACGAGAAACCTTGTTCTTACTTCCTAATGGTGAACCAAATTTATTTTTC
498	21306	d21306	4	19.054	Fvb4	30461573	AAxAB	0.35	1	6	-	42;G/A_239;G/C	AATTCTCCAGCATTGTCTACTGTCTAGTCGTTTTCCTTAGTGGCATGGTTTAAGTCTCATCTAGCAACTCTATCAACCTCTACCGTGTTTTCTTTCAAATCATATATTCTCCTCCCCAGGTTTTACCAGTTCAGGTGATACACGCAATTACAAATAATTTCAATACAAACATTTGCTTCTTAATCACTCCAACCATTCTTGTCCTTGTTAGTCTCACTCTCAACCCTCGTAAATAGAGAG
499	13568	b13568	4	19.638	Fvb4	30428014	AAxAB	0.44	1	1	-	38;T/C	AATTCTGAACTGGATAGCCAACTCGGTAGAATCTGAAACGCCCTTTTGCAACATGGATTCATCCTCCATGAGTTTGGTTGGGAAGTGTCCAAGTGCAATCACACATAGTGCAATAATGGTCCGAAAAGCAGCTACCTCATTTGCAATACCAAGGGGAGCTTCAACTGATATAGATTTAAGAGTATTTAAATCATGCTTCTGCACTGTTTCTACATCACTGGCAAGAACAACTCTTAAGGC
500	10825	b10825	4	19.951	Fvb4	30710392	ABxAC	3.37	3	4	-	46;G/T_152;C/T	AATTCGAAGTCCTAAAACATAGACCAAGGGAAAAGTTATACTTCCTTTTGCCAAAGAGGTAAAAATATCATGTATATATAGGTATGTGGTTTCTGTGTACTCTGGGGACCAAGAAAATGAAGGCCAAGCAACCCAAAAAAGAGCAAAGGAGATGATTAGTTCTGATCACACCAACTTTTAGGACTATTACAAGAAATATCTCAAGATAATTAATATTTCAAGCAGCAGTGGGTGCAGGAA
501	17297	b17297	4	21.558	Fvb4	31150420	ABxAC	3.92	3	49	-	127;G/C_177;C/G_234;G/A	AATTCTCAGCCACCGATCCATATATACACGTCTCTTTGATAATCTGAATATATGTCCACTACCCCCAACTGGTCAATTCCACCATTCCACCACGTTGTTCTTTCCATCTCCTAGTCAATAGTCCCTGCTCAACTACAATGCATCCGATTTCTCTTTTACTTGTTGGTTTTTACACTCGAAATGTGATTTCTTGAATTTTACCACGCTCGGAAGTTTCACGATTTGTTGGACTCAACTAAA
502	41890	a41890	4	24.025	Fvb4	31008220	AAxAB	23.86	1	36	***	28;A/G_201;T/G	AATTCTGAGATCCCGCAGCTAGCTCTCAATTGATGAACATTACCAGTTGGATTTAATTTAACAACGATCGACCTTACATATCATATATTAATAGCCCTATATATTGCAGGAAATCGGGAAAAAAAGAAAAGAAGAAGTTGCAATTTAGTAATTTATCATCACATGAAACGAGATGGAGACTAATTAATTAACATGCGCATGTTGATTAACTAACACGCACTAATTTCACAGCTTGTAAAT
503	38330	d38330	4	28.494	Fvb4	31646191	ABxAC	14	3	59	***	70;A/T_234;T/C	AATTCTGCACGTTACTCAATCATCAGTTACAAACAGTTGATGGATCATCTTACAGTTTATGTTCAACACCAGAATTGATTACAACACTTAAGTCGCCCCATTCTTCATGACACTAGATGTCATTTACTCTCTATATGTACAAGCATTGTTCATAACTTAACATGACACCACTATTGCGGTATTGCCCCTTATCACTTCATCAACCCCCAATACAAAGAACCAAAATACTCCATTTTTCAA
504	33485	b33485	5	0	Fvb5	234846	AAxAB	2.61	1	47	-	182;C/T	AATTCTAGACATTTCTTCAATTTAAGTAAGTTTTCTCCTTAATGGTGCTCATAATCTCCAATAATATATGCATTAATTATTCCATATAGACGGTATATCCGTTCAGTTTTCCTTTGTAATAAAATCTAGTAAAAAAATCTAAGGAAATCTGGCAAGAGGTATATATAAGAAAATAAATTTTATGCCCTTGATCAAATCATTCTTTTTCAATTTTGGTAACTTTCATGATTTACATTTCGA
505	39378	b39378	5	0.576	Fvb5	1061211	AAxAB	0.04	1	43	-	218;A/T	AATTCCAGTTTCAAAAACTCAGCCATATCATAATTTTTGATGATACGGAAAAAAGTTGTGATTATGTCAGTGGGGGAGTAACCCATATCATACAGCTGCTTCAGACCTGAACACGCGTCGTCAAATTTCCCTTCAAGTATGTTATGAACCATATTCTTTACATGCAATGGATGCGGCTGGTCGCAGACCTGAAAAACAAAAGAGACATATTTTGAGTTACCAAAGAGCATGAAAATATAA
506	18942	a18942	5	1.963	Fvb5	374366	AAxAB	0.93	1	58	-	49;A/G_92;C/G_149;A/C_236;C/T	AATTCAATGATCATGGCACCAGATTCATACATGTCAAGCCACTCAAGCCATAGCCAAGAAAGATGTTGCTTTCCCGCTGTGAATTGAACTATCAACTAGAAGCTAGTGAGCAGCACAAATGATTGAGACACGACTCCAACGCAATGACTATGCAGCCAAAGTTGTTTCCGTGGATCAATCTTCCGTTCTTTGTTTCATAAAAGCAGAGTGTCATGTTTATTTTCTCCACTTCCAAACTGG
507	39198	a39198	5	3.467	Fvb5	535113	AAxAB	1.03	1	5	-	37;T/C	AATTCACAACAGGAAGAATTGCTCAGATCCCAGTGATTTGAATACCAGATATTCAGTTACGGATAAGTGTTGCAAGATGCAAGTGAAACAGGAAGACTATAAATAATTATAACAACCTACAGAAGAAACTGACAATTACTTCTCCAACAAAGATTAAACTACACTAATCTAGCAGTCAAATTTACAATCAAAACGATACAAATCATATATAGAACATAAGCTTAAAGAAAAAGGCTTAAG
508	20196	a20196	5	3.703	Fvb5	198137	AAxAB	0	1	3	-	13;A/G_14;G/T	AATTCTTATCGCCAGCTACTAAACCAATTCTGTGTTTCGGTATATACATGCAAGAACGAGCTAGAGAAAAACTATGTAGTCCATGAGATTAGTGTTGGTAAAAATACTCTAATAGCTATTAGCTAGTCAAAATCCTCAATCTCTCTCCCTCCTTGGTTGGAAACCGATATATCATATATAATGGTACCGATATCATGAGTACTTTTGCCAACCCTAACATTGAGAATCTTTAAGCTAGCT
509	30365	b30365	5	4.87	Fvb5	331900	ABxAC	4.16	3	45	-	60;A/G	AATTCATTCGTCTACATTTTCAAATTGGTCCAGGTGAGAAGTAGTGAACATTACTAGTTAGCTTTGGAGTTTTCACAGGTGGGGATTAAAATGAAGAACTGATCATAGTGTTCATTGTTATAATATCTTAAGAAAACTGGCCTGATGATTTCATAGTACAAATTGAAATTTTGGATTGTTAACCTGCAGTTGGTGCATAATCAGACTGTAGTACATTTGTTCATCTTTATTTCAGTGAAA
510	6486	a6486	5	6.123	Fvb5	886068	AAxAB	12.24	1	56	***	25;G/C	AATTCTTCTTCTTCTTTTTGCGAGTGGCAGTAGCTAGGTGTTTCTGTGTTGTTCTTCCTTTAGTTTTCTTCTTCTTTCCTTTTCTTATATTTTGAATTAAGATTGTGCGGTTTTTTAATTTCTTTGGGTTATTGTCAACCATGACATTTGCTACAGGAAGCTTTTTACAGTGACTCTAATAGGGACAGAGAGAAGTTTCATGATAAATTGCGCTGATGCATTTTAGATTATATAAACTAT
511	38946	d38946	5	6.777	Fvb5	1548038	AAxAB	0.09	1	50	-	182;A/T_228;T/C	AATTCGTTTTGATTTAATTAACGACAAATCAAGGTAACATGCTATGCATGGCAGCATATCTAGGATGAATCGTTTTTAGGGTTTGCTGGATAAAGATTAGTAACTGAAATGTGTTTACTTGCTAATTTACAGATTCAACAACTATGTTGCCTATGCAGAATCCAAGCTCGCCAACATATTGCATGCTAATGAGCTTACAAGGCGCCTCAAGGTAGTGATTGAGTGCTTCTTTATTTTTTA
512	30399	b30399	5	7.542	Fvb5	1680123	AAxAB	0.01	1	2	-	61;G/C	AATTCTTCGCAATCAATCCGAACCTGAACTGCAAGCACCATCTTCGTTGGTGAATGGATCTGTGTAGATGGGGGATGCAAACTAAAGCTGCAAAGATGTTGAATCGATCATATCAAGATGCAGGATTTTAAGAGAACAAACTAGTTAGCTAGCTTGGAATTTGGTATTCCATGAAACATAGATGGAAACCCCCAAAAAGAAAATAAAATGGTTAAGTGAACGCGAGCAAATTTTCTTGAA
513	9397	a9397	5	8.685	Fvb5	3179873	AAxAB	1.01	1	3	-	27;A/C	AATTCAAAAGCACTCAACTAGTTTCAAAATCAAACTATCTAGCTAAATTCTTACATGCTTCTCATCCTTCCTGCCAAAAATTACACAGCGGCCACCTCGATCTCCAATGGCTAGGTGATCACCGCTCTTGTCGAATCCGATCGCCGATATCACATCAACTACACGCACAGCAAAATCGAAGCTTATAACTAACTAAACTTTAATCTCATTTCTGCATTGCTTCACTTCATAAAGCTCAGA
514	12638	d12638	5	11.585	Fvb5	3205999	ABxAC	2.19	3	12	-	113;G/T_212;G/A_234;A/G	AATTCAAGAACTCCTTCAATTACCTTACTGTGCATAACCTCTTTTCAACTTTTCTTCCTCGTTCTTAAGAAGCCGTTTATCAAGAAAAAGGTTCAGTTGGTTGAGATCGTCTCGGTTGCCAGTGAAGTAGGTTTATTTGCAACTTGTTTGGTTCTCTTGGAGAAGGAATTTTCAGCCAGTGACAGGACTAAGCTTGGTATTTTCATCATACTGCTGTTCTTAGTCGGATACATTGCACAG
515	14103	b14103	5	17.665	Fvb5	4613794	AAxAB	0.01	1	0	-	16;T/C	AATTCAAAAGCATATACAGCCTGCGCTCTTATAAACTAACCCAATTAAACATAACTCCAGAAGCTAATTACGAAAATATTAATGAAACAAGATAATGAAGTACAAAATTTGAACCAAATAAACATAAAGTTTCTTACTTAGTTACTACAGAGCTCCTTCTTCTTCTTCTTCTTCTTGTCTCTGCTTTTCAGATCGGCAATGGAGTTCTCGGCTCTTCTCAGTTGCCGAAGTTACATATTT
516	11508	d11508	5	18.778	Fvb5	5334735	ABxAC	1.24	3	20	-	50;C/T_70;T/G	AATTCACAATTCATGGTTTGGAGAGACGGAAATGATGATAATATCAGCCACCATTATTCTTTAACTATAATAAAAGGTAACAATTTAATCATGACAATGTGAGCAGCTGTCATGAAATCTCCATCTTAATTTGCAAATCATGTTTGAAACAAGTTAGCTTCTTGAAAATAGTTGTCAGAAACAACGGAGATTATTATTTTCTGAGTAATTAGTAATTTGATGTAAACGGACAACGTCAAT
517	725	d725	5	19.142	Fvb5	5441074	ABxAC	0.94	3	6	-	92;G/A_209;G/C	AATTCCCTTTTGAGCGAATAGTAGTTTACCTCCTTGTTACTACTCATTACAATGATTAACTACTGTTTTACCCACAGTAGCATAGCAGGAGAGTTAATGCATGTGTAGGGTTTTAAGTTTTAACCATCACGTACCTTGGTGGGACATTTTTCACCGCGCTCCTTGGCAATGTTCTGGACCTGGGTCAGAAACTGATGGCACTGCTCGTAGAGATGGAAGAGGTAATCCAGTCCGTTCTTT
518	14470	d14470	5	19.624	Fvb5	5442978	ABxAC	0.69	3	24	-	200;A/T_211;C/T_213;T/A	AATTCCAGGACTGAGATTGGTGTTGGGGTAATAGATGGTAATTTTCGTCCTTCCGTCGATCACTATCCATCATAATGAACCCTGTTGCTTTTCAAGGACAAAGGACACTGAGACCTGGAGAGAGCCCATATCTTGTGTAAGATTTTCTGAATCTCAAATCTGAAACTCTACCCGAAGACGACAAGCATGCAAGGGCCTTTTCGTAGTTTCACGAGGGAGAGTAAATACATAGTTACTGTT
519	16387	b16387	5	19.882	Fvb5	5802163	AAxAB	0.26	1	7	-	38;G/A	AATTCAAACAGATTAAATGAATAAAACGGTGATTGTGCGAAGCTGATGAAATGGTATATGAACAGAGAAAAACACTAGTACTGTGATTCTGCTTCCTGATTATTAAAGGGACAGTGCTTCAAATTCCATGATCAAGTTCTTTAAAATAGTGCCATGAAGACGATATACTGATCAACCAAATGAAATAACTCAAATCTCAAAATTTGCCCGAAACATTTCTGGCTACTGCTAAGGGCGCTA
520	9243	d9243	5	20.814	Fvb5	5826927	ABxAC	0.51	3	5	-	171;A/G_184;A/G	AATTCCAAGAATGAGTGAGGTGAAAATGAAATTGTTAGGATAATTGTTTTGCATACAACTGTCTGAGAGTGTAGGTCTAAATGATTATGGGTTACCAATGATGATTATTATGAATTTAAGATTTCGTTTTTGATTATCAAGGTATTGGCTAAATTCAAAGCGTAACAAACAATTCTACGGATACATGATTGAACATTATCACATGATTTTTATCAGTCAAACAAAATAAAATAGACTCAA
521	18170	c18170	5	21.059	Fvb5	5910931	ABxAB	0.57	2	2	-	168;A/G	AATTCAGAGAGAATTTGTTTTTTTTTTCTTTTTTAAATTTGAAGACTTCTGATGGTGTGATTGGGTCGGTTTTGGTGTTTGGTATGTTCTCAATCTCATAATCTCTAACTAACTAAGAAGCCTTATTTGGGTGTTTCTTAGGGTCATTTGTGATCTCTGGCTTCTTTTATTTACAACTCTGTATTGTATTTTCTCTTTGGAGAAAATTATTGGGGTTTAAATTGTATAAATATTGTTTTG
522	11709	a11709	5	21.668	Fvb5	5724959	AAxAB	0.11	1	5	-	164;A/G	AATTCAGTCTGTCAGAATATGCGCAGAGGTCAGCCAATAATAATCTCTTGAACATCCAACTACAGTTTCATGTTAAACAATTCTATAAAGCCAGAAGATTATCCTCAAAGTCCCGCTAAAGTTAACTAATGCAAAACATATGTTCTTTCTGGATTCTGGACACTAGGAGCTTAAGCCTCCATTGTTTTTTTCTACTTTTCTTGTCCACACCTTCTGAAAATTATATGTTACCTTTGGATT
523	41739	a41739	5	21.906	Fvb5	5852396	AAxAB	0.01	1	6	-	31;G/T	AATTCTCAGTTAAATTACACATGAAGCAGTCGCATGAGCAAAGAAACGGCGTGCACGAAGGCTAGTGGTTATAAACTTATGGCACAGATTAATAGCCAATACAGACACTCCCTATTCTAAGGAAATTGTTATCAACATAAACCATCTGAGATGGAAAGTCACTCCCAATATGCCATGCAGCTAGTAAGTGCATCACTAGCACCTATGGTGCTTAAAGCGGCCATAGAACTTGGTGTGCTC
524	13822	a13822	5	23.041	Fvb2	11887084	AAxAB	0.05	1	67	-	58;A/G_78;A/G_116;C/A	AATTCATGGTTGAGGAACAGAATCAAACAATCAATTGGGAAATGGGAATTTAGGATTGAGATTTGCTGATGTGGGACAAAAGAGGGAATGAGTTCGGACTGAGGACGATGGGAAATCGGGAATTAAGAAGGGAGGAGGCGACTCAGGCGAGGTAGGCTTTTCTCTCTTTGTATAGAGAGTAGAGTCTGTAAAGAGGTAGGCGACTAAAATGAGAAGGGAGGGCCTGGGAGGCGACTAAGA
525	22320	b22320	5	24.093	Fvb5	4068927	AAxAB	3.2	1	65	-	84;T/C_212;A/G	AATTCCAGTAAGTTGCTTTATCATTTGCATGCATTGCCTATCCGAGTTGCATCAATAACTACAGCTTTGCCAAACCTTGGTTTTCCAGCTAACATCAAACTTACATGAACAAGATTTTACATAACGCAGGTAACATTGCTCTAGTTTACATTTACATCATGCAGTAATTCATTGTATACTAACATTATGGTTACTTATCATTATATCACTAAGAATGGAGCAACAATAAAATCTAGTATG
526	40212	a40212	5	30.284	Fvb5	7679306	AAxAB	2.78	1	1	-	90;G/A	AATTCAAGTTTCAACACATTGAAAGGCCAACAACTTGGAGCTCCAAATCAAGGAAGACCTGAAATGGAGAAGGTATACAAAGGTAAGGAAGGGCAGCCTAGGGTCACAACACAGGAGGCTGTAGAGTCAATCCTAGGCATTTCATGTAGTAATTCTTCACCAGGATTATTTATAGCTCCATATCCTAGGAACATGAATAGGTCAGCTTCATTACAGAAAAATCAACCTGCACTGAGTATG
527	40437	a40437	5	38.096	Fvb5	13041671	AAxAB	2.78	1	1	-	173;A/T	AATTCCATTTTGTGTCATAAATTCCAGGTTGTGCAATATGATTATCATATACAAAGTTGAATGAGTTCAGTTTCGTTTCAACCAAAGGAACTAGAACGCACCTTTTGGCCTTCTCTGTTTGGCCACACCTCTCCTTCACCACCTTCCATGATCCTTACTATATTAAAACCTCTAAACTATTAACCATCCCTCAATGCAGCAATCTCATTCTCTTCTTCTCATCTCATCATGCCAATCAAA
528	19131	a19131	5	38.13	Fvb5	12834345	AAxAB	2.78	1	1	-	111;G/T	AATTCAACAAACTCCCAATCCATTTCAAATATTTAAGATTTGGAGCAAAAACATTTAAGGATCTGGTAGTGTCACTGATAGTATTGTAGAATCCCCACTCTATTCTTATCGGTGTAAGCTTCTCACCTGAGATGCTAAGATGGCAGGGACGATTGTAATGTTTGTAGTCAAAGATGAATGATTCCAAAGATGGGCTGTCCACAGTGAAACTTCCCACTTTAACTTCAAATAACAATAATT
529	42515	a42515	5	38.13	Fvb5	10531178	AAxAB	2.82	1	3	-	239;A/G	AATTCAGAGGGCTGGTGGCATTGAATTAATGGTACCTGGGACAAAGCATATGGGGTTAGTTGGGAGTTTGAATGCTCTCTCATCAAGACCTGAAGCTCTTCATTAATTTACTGTGCCTGCTGCTGCTGCTGCTGTTGCTGTTGGTGCTCCTATCAATTGTGTTTTTGCTTCCAAACTTCATTACAGTTCACACCAACTATTCGTTTGTGAGGGGTTTCATAGTCATTTTTGTATTTTTGA
530	28271	a28271	5	40.602	Fvb5	11979444	AAxAB	1.36	1	1	-	139;C/T_151;C/T	AATTCTAACAAATATTGGTCAAAGCTGTGCAGTATCTTATCTCCTTGTTGTTGACATGTGTCAGGCCCTTATTGATCAAATCATACTGCTTAAATTCAGTTTTGGCTTTATGATGCCATGTTAAAACTTCAAGCTCATCCAGAATTATATTCTGCCAATGCATTGGTTTATATAGCTTGAAGAATTTGAATGGTAGTAGTTAGTTCTGAGTTCTGACCATATTCTTGAGGGAAAGCATAA
531	12051	a12051	5	43.011	Fvb5	15343106	AAxAB	1.88	1	9	-	8;G/T	AATTCACAGATTCCAAGAAAAAACTTCCTGAATGAAGAAGACTCCCTGGCAAAGGGATGAGGGCAAGCATTGAATACAACTACAAGCAAAAATCATGAAAAATACCAACCAAAGGGAAGCCAGCCAAATATGGGTGCCAAATTAACTGTGAAAGCAAGTCAGAGCTTGTTTTCCACAGGCCAGCCACAAACATACACAACGCATGACATTGCTCCACATGAACTGATCAAGTATGTATCT
532	22152	a22152	5	43.129	Fvb5	15346543	AAxAB	4.77	1	14	*	50;C/T	AATTCATAAGTGATCTACAAGCTTATGATTGATGTGTGCTTGTTGGTAAGCTGCTGCCACCATTCTGGTCACAGACAAAGCGTCCAACTTTCGTAGAGCTTTATGCAAAGAATGTTTTAATGCATCATAACTGGACCCATAAGGTGCTCGATGAAATGTCTCAATGAACTTGCTTTGCAATTTTCGCAGATTTTCGTTTGTTTTCAACGATACCCAATTTGCAGGGTGGAGGTATGGCTC
533	19766	b19766	5	54.94	Fvb3	15508981	AAxAB	0.55	1	56	-	37;G/C_187;G/A_221;T/A	AATTCATGATCAACTCAGTAACCTTAGGTGTCCTACCCTAAGTGACTTCAAATGGTACAAAGATGTATTCATTTCTCGAGTTATGTTTAGAGACGATAGTAACCAACCTTTTTGGAAAGAAAAATTCATAAATGGCCTTCCAAAGTTATTTGCTCATAAAATCAGACAAGTTCTTAGTAATGAAACAAGACACATAAACTATGACTCTTTAACTTATGGAAATATAATTACAGTTATCCA
534	18275	b18275	5	55.213	NA	NA	AAxAB	0.62	1	41	-	150;C/T	AATTCAGAATATGGTAAAGTCCCCATCGACAAAACATTTGGAAATGTTTCAAAAAACGTCTGGACACTATGTAACGGGTCATGGGTGAAAAAATTAAGCTTCATGCACTTGAAACCAAAGGCATATTGCAGTACGCAAGTAAGAAACCCCTTGACGAAAAGGGAAGAAACGAGAGCTACACAAGGTTTTGATTCCAAATGCCTTCTACATTCCCCCATCATTAAACAAACGCACCAAAGC
535	43128	c43128	5	55.651	Fvb5	17667996	ABxAB	4.31	2	3	-	148;G/C	AATTCAGGGAAGTGTATATAGGAGAGTGAAAATGTCGGACAGAGAGAGGCCTCACCTGAGTGACGATTGCATACAATGGTAGGGTGCTATAACTGCAAAGCACTTGAACTATCAAACTGCGGGGCAAGATGAGCACTTAGAGTGAGAAGTGCTACTATGAATAATGATCTTTGGCTTCTATCAGAACCAAGCAATGTACAACAGAGGAAGGCAGCTAAGAAAACTAGATCGTCACATATT
536	22921	c22921	5	55.705	Fvb5	17630767	ABxAB	2.65	2	8	-	22;T/C_56;A/T_161;C/T	AATTCTCAAGTACTCTGCGCAATACATCAGCTAATTGCCTTCAGTTTGGAAGGAAGAACTCCGACGATTCTGTCTCTGTTATTGCCTTCCATAGTTCCTCTGCTGTGAGTAGTACACTTAAGTAATCCTTTTTCTGCAAATCAGCTGCCAATACTCAATACCGTAGCTTCCTTTTTAAAACTATGGAGAGGATGATTAAGAAGTTTAAACTTGAGCTACGTTCTTAAATTGTTCACATTT
537	11210	c11210	5	56.215	Fvb5	19837678	AAxAB	7.54	1	41	**	29;C/T_122;A/G	AATTCCAATTACTTAACCCTGTATGGTTGCATAAATATAAAAATTACTCGTGTTGTCCCCAGTTATGCAATCAACTGCTGATTACATCCCCCCAAATATACCTGTCCTTCATGGAGACATTCAAAATTGGCCGTGCTTTGGTTGTGAAGAAACTGGATCCTGTCATCTCCACTAACTTCATGTTTTATCATATGCACACCACAGAAACACATAAAACCATACATACATCCATCAATAACA
538	12754	a12754	5	56.609	Fvb4	28460431	ABxAB	1.17	2	7	-	114;C/A_203;G/T	AATTCAACCACTGGAGAGGCCTTTTAGATAACTTCATGATCCTAATGAATTTCAAAACGCAGGCACACTGTCACTATCAAACATGAAAGCTAAAAGTTAATCACTGTTCACCATCGACTGTTCTAGTAGTTGCAGAACAAACACTCATGTGAAGCTGCAAGTTATACCATAATTATAAATGTTCTGAACTACAGAGCATAAGAGAAGTCAAAAGATAAATACCAAGATAATTTCTTTGAT
539	41252	a41252	5	56.885	Fvb5	19834035	AAxAB	2.86	1	44	-	45;C/A	AATTCACACTCGAAGAGTTGTGTCATGGATGCGTAAAGAAGATCACGGTTACTAAAGATGTCATCAACCATGCAGGGTTTGTTACTTGTTCTACACTAGCTCATTCATTATGACTGCAAGATTACTAGCATGAGGACATCAGTTGACACAAGTGTTTTATTGATCTTGTTATGACTGCAGGATTATTGTGAAAGAAGAGGAAATGCTGAAAATAAATGTGCAGCCAGGTTGGAGGAAAGG
540	19638	d19638	5	57.023	Fvb5	19489745	AAxAB	1.67	1	10	-	62;C/T_158;C/T	AATTCTCAGGTTGTTGGCAAAAAGATGCAGCCAACACTAAGACCCTTGCCTTCGACGGTGTCCTCATCACGCTCTATTCTGTCGCCCTCGACAAGTCCCACATGCTACTTCGTGATCATGTTAAAAAGGCAGTCCCGTCCTCATGGGAGCCTGCTACATTAGCCAGGTGAATTAAGAGCCACCCTTGGTCTTCCTCATCTTTTGTTTTATTATCTGATTGTGTGTCTTTTCGTTCTAGGT
541	14686	a14686	5	57.105	Fvb5	19633614	ABxAC	2.93	3	10	-	10;A/G_18;C/T_24;A/C_29;G/A	AATTCTAATGATGTTTTACGATTAAGCCTGTAATAACTTTATTTTTATTTCTTAAAGATATTTTTGTTACCTTAGTTTTGTAGGCAATTCAAAAAAAAGCTTCACGGTAAAGGGCGGGCGGTTACTCCTCACCCAGTCCTTTCCTCCAAGAATAAACCGTTCCCGCCCACCACAACTGCTTTTGTTTGTTGTCATCCACTATCCCGAATCTAAACATTCCCAAAAATGACATCGAAACTA
542	32542	b32542	5	57.108	Fvb5	19513247	AAxAB	0.08	1	38	-	96;G/T	AATTCATAATCATTATTGGTTTTTTTTGTCAGGTTTTCTATTGTATGCGGCTCTTGTCATAACTGCAGTGTTTATACTTATATTCCACGTCATTCCGCAATATGGCCAGACACATATTATGGTTTACATTGGAGTTTGTTCGCTTGTAGGTTCCTTGTCGGTATGTGTTGCTAATACACTTTGAGTATCTTTACTGTTATGCTTGCTTTCTCCCTCTCATCCCATCTTATTTTGTGTTTG
543	40560	b40560	5	62.97	Fvb4	6287069	AAxAB	6.19	1	44	*	189;A/G	AATTCCATAGTGAACTGCAACTCGCAGGTCCAAGTCTGCTGACGTCAAACTGCCTTGCTACATATTCTGCTGAAATCAGCAATCACGAAACTCAATCAAAACTTCAAAATAGAGAAATTAAATTCGAAATCTAGTTTCCAAGAGCTTGAGCTCAAATTTCACAAAGACGAACGCAACTGATTTAAAGACGAAGGATTTAAGAAATGAAAACCCTAAATCACAATTCAAATAACAATCAAA
544	5480	a5480	5	76.332	Fvb5	26383453	AAxAB	17.29	1	33	***	126;G/C	AATTCTTGCTTCCATTCCCTTCAAAGGCCAGGTCAGTACTCTTGTTACCATCCCAAAGGAATGAACAGATGTGAGTGCTCTTCATTTTGGTTTAGCGTAGTCGGTTCTGAAAAAAAGAACAAAAGAGGGTCTGAAAGCCCTTTTTTATTTTTCATAATATACTCACTAAGTTGGTGATTAGATAATTAGTAATGATATTTGAATTTCTTTGGTTTTATCTTTGTAGGTCCTTAATGAAAC
545	29424	a29424	5	77.254	Fvb5	26991020	AAxAB	4.37	1	2	*	124;A/C	AATTCAGATAATGAGAAACGAAATCTGGAAATCAATCTTTACACTAGCCAAGAAGCAAAAGGGAGAGACTACAAACTGAGACCAGCTACAAACAAGCATAATTACTTGAAATCTAAAAAGTAAGAAAGCAAATAAATCACTTCCAAAAGATTTTCACTTCAGTATCATATGTGTTCAGAATCATCGAAATCAAAAGTACCCATTAACGCTTTTTCATTATCAGAGTCGTTTCAACGAAAA
546	30515	a30515	5	78.553	Fvb5	27848962	AAxAB	3.04	1	0	-	94;C/T	AATTCCAAAATGGTTGTTCGCCATGGCCCCTGAATCTTATTCTGCATATTGAACTTATGAATCATTAGTATGCATGGCTTGCCTTCCCCATTACCTTCCATATAGTGTTGAGGACGGTTATGTGTGATGCAATCTCACATCGCTTTTGTAACAAATTCTATTTCCTATGCAAATCTTGAGAGAAAGCGAAACCCTAATATCAGCAATTCCAAATCGACTTGTTAAGCTTCGAGAATATAA
547	19396	a19396	5	79.763	Fvb5	28991129	AAxAB	1.31	1	16	-	10;A/G	AATTCACATTACTGGAATCCAAATTGCATGACAATGTATATGCAAATCAAAACTCAGAAGTTGCGTCTTACTCTGGAATCAGTTCAATTCATTCAACCACTATCATGTGTCACCAATTGCATCCATGAGTACTATGATGTTCAATTCGGTAGTGATGCCAAATTATTGTTAGGCATAAAACAAACAAGAGTAGCCATGGGTTTTAGCAGGTGATTATTTCAATATAGGCATATCCTTGGT
548	7031	a7031	5	0	Fvb5	178230	AAxAB	1.69	1	12	-	171;G/T	AATTCCAGATTTCTCAATTTTAATTAAGAAAAATTGAAAACATACCACATGATATAACTATCTTTGTTTGGAAAGCACATACTAAATAGCCATTTGATGCCTTGACATTGTTTCTTTTTTCTTTCATTTTCTTTTCTTGGACGAGACAAGAGATATTGCGATGAAGACAATGGAAATTTAACGCCGACGGAAAATTAATCATGCCACGTGAGGTAATGGGTTGAAATTTAACTGCGTTGG
549	19260	a19260	5	0.677	Fvb5	520505	AAxAB	2.78	1	1	-	168;C/G	AATTCATTTGATTGTGTTGTTTATACACACGTATATCATACTGCGTACTTCTCTAGCTAGACAAACTACAAAGAGACCATGTTCTTGAATTATGTACATTTTATCTCATGTAATAGAACCCAAATGAAATGAATTAATTGAGTGTCCCCAAGACTCTCCAATCCATTACTCACTCTCTTAGTAGCTCATTTGCTGCACTGAATCAGAATTTTCGGCATGTTTATGTTTATGCTTAACCAA
550	10650	a10650	5	1.271	Fvb5	381038	AAxAB	2.25	1	1	-	59;T/C_141;G/A	AATTCAAATAAGAAAATTGAGCTTAGAGACTTAGAAATACTAGCAAATTTTCTTCTTCTTAACTTGATGAAAATACATGAAAAACAACCCAACTATTCTAATTCAGAGAACAAAACTCTAATCATTGTAGGAAAGAACAAAGCAATTCACCACTGAAAAATGAAACCAATATGTGCAAACAGAGTAACCACCAACCTTGAAGACTAGTCATGTTCCCAATCTCATGGGGTATACCCCCAG
551	13011	a13011	5	1.306	Fvb5	915421	AAxAB	0.01	1	26	-	98;C/T_105;G/T_153;A/C_192;T/C	AATTCAGTGGGTCCTAAGACCTCAAATTCAGGCTTGTTAAATTCAAATTCCTCTGTGCAGCAGGATCCTATGCAGAACTTGATTCAGGAGTTTATGAACAGCCGAGCAGTGAATAGGCATGGTAGGGATGAAGGCAACTGGGGAAGAGGTAAAAGTTCTGCTGTAGACCTGACATCAGGAGTTTTGGGCCGCTCAGCAGCTGAAGCTGCCCTAGGAAATGTGTTGGGCAGTGTGCCAGTG
552	22531	a22531	5	2.78	Fvb5	1540359	AAxAB	1.2	1	4	-	18;A/C_141;T/C_205;C/A	AATTCATGTTCCTTATTGACATCACTACATGGACACCTCGCAACGCAAGAACACGCAGTGTCTCTAAACCAATACCGCTTGTGGCTCCTGAATTTTAACAAAAGTTTATACACCCAAGCACTTGATGCTGGAATCTTATTCTCTTTCTAAACCAATACATAACTAAGCAACAAGCGTTTATATATCATATAGACGATGGTTTATACCTTTATATCTAGAAATTAAGCTAGCTTAACAAAA
553	29441	a29441	5	4.637	Fvb5	1685756	AAxAB	3	1	37	-	81;A/T	AATTCCCACACGAATATAAAAGGTGTTGGACAGCTGCAAAGACATGTATTTGTTCCATGACCAGAATTTTGTCGAATGCAAAGCCACCAACAGACAATGTCACGCTCTCATCTCATAATAAAAACAATGACTCAACCTTACCAATATGCCAAAAGCCAAACCACCCAATTTCATTGCTTTCACGCGTTATAGCTAGTGTGTGTAATACATATTCAACTTCACCAATACGCCAAAAGCAAT
554	6713	a6713	5	5.875	Fvb5	2639436	AAxAB	0.21	1	28	-	112;C/T	AATTCAGAAAGAAATGCAACAGAAGTATAGTAGTACCCTAGATCATGCATTTGCCCGTGTACATAAAAAGTAACAGTGATCAATTAACCTTCCATTTGGACGAAACATGTATCTTAGAATTAGTTCATGGCCTTCTACTTGTCTAATTGACTATGTCAATGCATTTTAGCACCAATGGGAAATGTATGAGGCCAATTCATGGTCGTCTATTGTGCGAAAGAAAGTCTTATAAAGTAGTTT
555	1818	a1818	5	18.642	Fvb5	4858863	AAxAB	9.8	1	27	***	238;A/G	AATTCCTTGGAATTTTATTTTCTTCTTTTGAACTTATTGTTTCTCTGAACTTGTAATTCAGGATGATAAACACTTGCATTCCTGAAGTACTGCTGGTAGCAGATGCCATTGGCACTATATCTTCGATCTTGTAATTCCACTGATAGTAGCCTAGGAAGATCTAGAAAACTATATATATGCTTAGGAAGAAGCTTCAAGTTTGAACTACTGGCAAATGCAGTAGTGTAGTAACTAGCAAAT
556	42019	b42019	5	20.226	Fvb5	2385793	AAxAB	22	1	57	***	6;G/C_12;A/C_116;T/C	AATTCCCTGTCACAATTTCTCTGTTATCAAATTCTTTTGGAAGTATTCAGTCCATATTTTATTACGTTATCTGCTTTCAATCCATGATAAAGGGTAGCTTTCAGTCCATTAGAGTACGCTTTCATCATCATGGATACATCTTAAAGCAGCTGAATTTATCCTCGTGTGCCAAATATTCTTTGACGATGTCTGAAAAGGAATTGTTTATTATTTATTGTAACTTCGGTTTTTTTAGTGTGT
557	794	b794	5	21.95	Fvb5	2022347	AAxAB	1.4	1	24	-	40;G/A_139;T/C	AATTCCTCATGCATCCACGTAAGTACTTCTCCAAACAGGAATGGGTTTGGTGGAAGCTGGAGATAGAGGTCAAAGCTTTCAGTTCCCAGGAAACCGATTCCAATACCCATTTCCAGGTCCCTGCACTTGTTTGTTTGCACGTCTGCCACGATACCCTGCTTACTACTGCAGTACTGCTACGGTGCTACCCTATCACTCCTTTTTACCCTCCTCTCAATAATTTTTCTCTTCCGTAAAAAA
558	22768	d22768	5	26.665	Fvb5	6694570	ABxAC	6.69	3	41	-	23;T/C_34;T/C_215;C/G	AATTCTTGATTCCTCAACCAAAATGACGAAGCGATCGACTTGCATGCCCAATTTTACCTTCCATTCATCACCACCGAACCCTAACCAACTCCTTCAACACAAAACTAAAACGGGTATTTATTGCTTCGCGTATATGATATATCTCATCAGGAATCATACAACTCTTGTACAAGCCAAGCTTGTAAAGGAATCTAACTGCTAAAATATGATCGTATCCTAACGAGAATGTAGACAAACAAA
559	24667	a24667	5	28.617	Fvb5	6116706	AAxAB	0.29	1	21	-	192;T/A	AATTCTTCCAAAAAACACAATGGAAGCTATTTCAAAATCAATTTATATCCAGTTGATGATCATAATCATCTTTTGTAAAAGAACAACTATGACAAAATAAAATAAGCTTACATTCCCATTGTTCTCGGAACTGTGGGGCAGTGGAGGCAACTTTCCATTTGGGGTAGCTGAAACAAAATTGATTACCTTAATTCTCAGTATTGTGAAGTTACTAGTAAAACTAATGTCATGCATCAAACA
560	11595	a11595	5	30.337	Fvb5	6516273	AAxAB	2.32	1	72	-	103;T/A_232;T/C	AATTCTTGAGTGCTCAAAACACAGAGTAATGATATTGAAATTGGTAGAGACAGATTGAGATCTGCAAACTGCTAGTAGGGACGTACTTTTGTTTTACTTCTCTTTAGTATTATCCATTTTGTTAGAACTATATGATGAGGTAAGATAGATACCATTTGTGTCTAATGTGGATGGCCAGTTTCTTTCAATTTCGTGCAAGCCAATCGAAATGAATAATGGTACTGACTGTCACTTGGAAAC
561	18285	a18285	5	31.724	Fvb5	7093841	AAxAB	3.97	1	34	*	59;G/A_156;A/G_172;C/A_229;C/T	AATTCCTTATATTAAGCACACTTGTATAATTGGTTTCCAGATTTCTCTACCATTGTTTAGGACGACTCTATCTTGAGGATGCTGGAATTAGTCACCATTTTCTCTTCTATATATTTTGTTAATCTCACTACATTACAAGCACCAAAAGGCAAAGACAGAAAACAAATGCAATCAACTGGGTGGAGAAATTGCTTCGTAATTTCAAACTAGGTTTGTAGTTGTTGACTCACAGCTGATTAC
562	14215	d14215	5	32.998	Fvb5	7388933	ABxAC	4.96	3	7	-	167;C/A_175;A/T_205;A/G_236;G/T	AATTCAATATTTGGACAAGAAGTGCTGAACAACTTCATCAGTCACATCGACATCCGTCAGATCAAGAACTTTGAGCGACTCAACACCAATGCATATATCATTAGAGTAGTTTAGATCTAATAAAGTTAATTTCCTGGGAAAAATATGAGCGTCTTTGGAAACCAACTCATGATTTAAGTGTTAATAGGATCAATGGGATTTAGGAAGTGATGCATGCATGATCACTGTTTGGGGAAGAAC
563	10980	a10980	5	34.41	Fvb5	7443997	AAxAB	16.64	1	39	***	134;G/T	AATTCTAGTTTGAGAGATGTTTTGGAATTTTATAGAACTTGGTCAGATTGGTGACATATCTTTGATTGAGACATAGCCCTTATAATGACCTTGCAACATTTGTCAAGTTTTAATTTCTTTTTTCTCCTTGATTTGCAGTGCCTTATCATTGATGAAGCTGACAGGATACTGGAAGCAAACTTTGAGGAAGAAATGAAGCAAATTATTAACATTCTGCCAAAGGTAAATAAGATGATTGGT
564	15556	a15556	5	39.699	Fvb4	12904519	AAxAB	0.25	1	1	-	26;C/T	AATTCTCCCTCTTTCTCTCATTATCTCTTCGACTCTCTGATGGTGGCGTCTTCGTGATCATCGTCAAGAGGACAAGGCTGCTAATTAGTTCGGGGTTGATGTTAATCTTTAGCTCAAGGCTACGATGGATATGGAGTGGTTGTTTGGTTAGCTATGCACTGTGTGCATCGATTCGAGTTGTACGTAGTTCCTGACATGTAAGAAAGTCACTTCTTCATTGAGGTAAAATGCCAAGAACCC
565	13888	a13888	5	39.719	NA	NA	AAxAB	0.03	1	11	-	22;G/A_91;A/T_156;C/G	AATTCCTAGCTAGTTGCTGAATGGTGGTCAACAAATCGATCTTTCTTGAAGAATAGGTCATCATCTCGGTGGAGTTGTGGTCACACTGATCACACCCAAAGCAAGTCATTGTTGGGAGGAGTTGAATGAGAATAATAGCTTGTGTAATTATACAATCATCACAATCTTGCAGCATCATGGAAGCTTACTTTCTTTTTCGATTACTCATGGAAGCCGTCACAGATAAGAATAAAAGAAAAT
566	13630	a13630	5	42.068	Fvb5	9168859	AAxAB	0.8	1	44	-	55;T/C_82;A/C	AATTCATAGGAAAATCGGGTGTTAAAATCATGTTTTACCAACGGTTCCCTCCCTCTCTCTCTCTCTCTCTCATTTGTGGAGAAGTAATCTGACTGAATAACATAATCGCTCTCTATTTCTGGATAAGTGATCCAATTGGATAATGGCTTTGAATGTTAACATCAATGTCATGTACACAGCTGAACAAGAGATGCTGTTTTAACTGGCATTCCAGTATCATTGCCCATGCTTGCACTTTTA
567	7298	c7298	5	44.249	Fvb5	10985180	AAxAB	0.36	2	2	-	113;G/T	AATTCTTTAGGAGATGGACTGGGTGAAGGATATGGAATGCTTGGTCAGGCTGGGAGTGGCAAGTTACGCGTGTCAAAGTTGCTAAAAAGTTCAAGAATAAGAATTATTGAAGCGCTGGTGGTGCTATATCTGGACTGACTTCAAGTTTGGCATTTACTCCTGTGCAGGGGATTGAGCTCTCGAATCCTCACGCTCATGGACAGCAACTTGACAGTGGAACTCAGAGCACCTACTTCTCTG
568	42349	a42349	5	44.803	Fvb5	10804271	ABxAB	0.7	1	3	-	178;C/T	AATTCACGTGTAATATTAACAGAGCCACTCATACTACTTGAATAGTCAGGAACAAAAAGAAATAAAGAGTAACAGTAAACACCAGACTAGGATGAAGAACTAACCTGTCCAATCACAAACTCATAGTTCCCCTTAAACCGCTGCCTCAATCCGCTCTCTTGAGTAGCCAAAAGTTTCTCTGTACCTCCATTACTAATAGCCGAAACAAGCGCAATCAAAGCTGTTGTATCAAAGTTCACA
569	20802	c20802	5	45.068	Fvb5	11474448	ABxAB	0.91	2	36	-	150;A/G	AATTCGAGTTGGAGATAAAGAGATTATGAGAAAGTGATGAAGGGAAGAAAAATAAGCTTTCTTATACACTCCAATAAAAGTGCATGGAATAAAGCAACATTGTTTTCTAAAAATCTTTTAAGATCAGATATCAGATCTATGATTTACCAGATTTTAAACCTCTTTTACCTAATTTTGTAAAAGGTTTTACCAAGTACGTTTTATAGTAAGAATGCTCAAACACATAAATGAATGAACATT
570	33964	b33964	5	45.405	Fvb5	11979444	AAxAB	0.61	1	12	-	12;C/T_84;A/G_195;A/G	AATTCTAACAAACATTGGCCAAAGCTGTGCAGTATCTTATCTCCTTGTTGTTGACATGTGTCAGGCCCTTATTGATCAAATCATACTGCTTAAATTCAGTTTTGGCTTTATGATGCCATGTTAAAACTTCAAGCTCATCCAGAATTACATTCTGCCAATGCATTGGTTTATATAGCTTGAAGAATTTGAATGGTAATAGTTAGTTCAGAGTTCTGACCATATTCTTGAGGGACCTATTTT
571	40167	b40167	5	45.877	Fvb5	12574806	AAxAB	0.71	1	5	-	135;C/T	AATTCATCGTTGTCTGTAGTGGGAGGCAAAGGTGGTCCACGAGGTGGAGGTGGGGGTGGCGGTGGAAGAGTTCATTTTCATTGGTCTAAGATAGATTTCAGGGATGAATATACTCCATTTGCAAGTATAAGTGGCCTCATTAACAGAAGGTATGCTTTGGTGTCACCGCTATATGAAATTGCACATCAGTACAGTTTTGCTGCTGCTACCTACCATATCTTCGAGTATATAATATCCGTG
572	39883	b39883	5	46.695	Fvb5	10635742	AAxAB	0.85	1	2	-	48;T/C	AATTCCATCGTCCATGTGAAACTATGTAGAGTAAATTTGAAGCTTGACTCGCTTCCACGATTTTTACTTTCATCAAGCAATTTGTCATCTTTGACCGTAGTAAGTTTCAAGTTGCAGCGTCTCCCGATAAGTCTAGCTACTGTGTTCAACTCGATCATGTCAACAACTGTGTGGTATAACACAAGACCAGACCACCGCATCCAGCTACAAATGGAGGCCGTCTTTCCTCCACCTACAACT
573	31939	c31939	5	53.746	Fvb1	19805392	ABxAB	0.26	2	50	-	178;A/T	AATTCCTTAATAACAATTAAACTAAATCCTTAGTTCATAATCACAGCATGAACACATAAATGATACAACAACAAAATTCCTCCAAACTAGTCACAAAGCTACTCACATAAACTTCCAACAATTATCCAATTCACTCTTAAATTGTTCAACAGAAAAACTCTATATTTGCTTCTCAAAAATTACCTTCAATGTAGCTCGATATCAAAGCAAAAGCTTTGCGCCCTTCTCTGCCCAAACTTG
574	23649	a23649	5	59.649	Fvb4	24891413	AAxAB	1.4	1	5	-	158;G/A	AATTCCGCCATGCATCTATGCATCTCATTGCAAATATGTTTTGGTAACTCAAAACCACTCATCACATACGTGGGCACTGATTGAACGACGGCCTTAATCATTACCTCCTTCCCTGCTGCACTTAAAACTTTATCCTTCCAATTCTTCATCTTATCTCTGGTCTTTTCCATGATATATTGAAAAGCTTCTTTCTTGGAATAGCTCAGTTCCGTTGGAAGACCAAGATACTTATCATTTTTG
575	16724	a16724	5	62.211	Fvb5	24372896	AAxAB	0.88	1	31	-	152;C/T	AATTCCTGCACCAGAAAAAACAGGAGAGAAATGAAGTTCTGTCTTGGAATGCAGGGAGTTCTGGCAGGCGGTTCTGGGTTGCAGAAATTCCCCCTAATCTCTTTTTTCCAAATTATTGATAATATCACAAATAATTACACGCAAAAATACAACATTTTCTTTGATTTCACAGAGTCTGACTAAGGATTGGAGAAAGGAGGGAGGGACATGAATGGAAAATTCAAAAAAAATTCAAAAAAA
576	10879	a10879	5	64.604	Fvb1	6838353	AAxAB	1.8	1	3	-	60;T/C_106;A/G_171;C/T_228;T/C	AATTCTCCAAACCAAAAAAGAGTAACGAGGTGGGATGAAAGACTGCCATACATTAGAAGCTCAATCTTTGACAGTGTTATGGTGCCTCAGATACCCAACAGAAAAAATTAACTCACAGGAGGTAAAGGGCTCCCAAATAAGCATGTCTGACTCATCAATAAGAGGGAGTGCCAATTCTAAAATCTGCCTAGTTAAGAGCAGAAAAGTTTGGCAAAAGAAGGGAGGAAGTTATTGTTTGAG
577	14396	a14396	5	77.854	Fvb5	28161007	AAxAB	3.53	1	20	-	15;T/C	AATTCTGAATATTCATGTCAGCACAGATATTAGCTGGCTCTGCTTATCTTTCTCTCTATCCAACACTGATTCAAACCCCCATTAAATCCAGACCTACTGCCACACTGTCCCTTTCTTCCATGCACTTGTATAAAATGCAGACCTCCAGAGACCATCGCAACAATCCATGCCTACAACATCTGGAACTTCCCCTTCGCTCCCTTCATCATTCGGGTCTCCAGGACCTCACTCTTGCACCCC
578	31687	a31687	5	0	Fvb5	2385793	AAxAB	2.04	1	62	-	220;A/T	AATTCCCTGTCACAATTTCTCTGTTATCAAATTCTTTTGGAAGTATTCAGTCCATATCTGCTTTCAATCCATGATAAAGGGTAGCTTTCAGTCCATTAGAGTACGCTTTCATCATCATGGATACATCTTAAAGCAGCTGAATTTATCCTCGTGTGCCAAATATTCTTTGACGATGTCTGAAAAGGAATTGTTTATTATTTATTGTAACTTCGGTTTTTTTAAGTGTGTTTCAGACTTGGA
579	30229	a30229	5	0.506	Fvb6	28323222	AAxAB	0.11	1	3	-	126;T/A_171;A/T	AATTCAGCTCGTAATAATCGAAGATAGGATATTTGTTCATTTTAAAAAGTTTGACTGTAATTTAAGAATATAACATGAGAGTTTTGAGTATTTGACATGTTTGTTTATAATTAATGTTGACACTTGTCCATCTTTCATTGGTGTTTGTCACTCATAAATGACCATAACTGGACACCCAAGTTATTTCCAAACAAAAATACCTCACTTTTAGTAACAGACTTAGTTTCTCGCGATATTTTG
580	6276	a6276	5	0.807	Fvb5	1680141	AAxAB	2.47	1	54	-	86;A/G	AATTCAGCAGCACTAATGCCTCCCTGATATCGTTGAACTGATTTGTAGGGTTTCATCCCGTAAACGCTGTTGCAGTCTGGCTTGCCATTCCCATCTACCCATCAAACCAGTTTGTAAATTTGAACATAAAAAAGTTGTCTGCTCTCCGTGGAGGAGATGAAGAGTACAAGACACATAGCAGAAGAGTCACATTGAGAAAAATGAACACTTCGCAACTCTCCTAACCGTTTTGGGATGCTA
581	33710	b33710	5	1.148	Fvb5	1608662	ABxAB	6.24	2	47	*	56;A/C_64;T/C_130;A/C_182;G/C	AATTCAATTATCTCACCAATCACCATCCTAAGTTTTGTCCAATCAACTCCCAACTACATACACTCGTCTACTTTAGAGCAACATATTGATAGATACACAGCCAACTAATTAGGCAGCAACTTGGAAATATCTGATATATGATGTCAAAATGACGAAATCCCTATTCCAATAATGTGCAGACCCTTGTCGATCTGATCACAATCTGTCACAAGAAGAAGCATAAATACTATAGAGCCTGTT
582	28008	c28008	5	2.138	Fvb5	2171817	ABxAC	2.39	3	10	-	64;A/G	AATTCTTAGAGTTGCTTGTTGTTCCTCTAACCCTGACTGTAACATCCCATCTGAGAACAACTACAGGAGGCAAAAAAACAAACATGTGAGTGACTGAAGACAAGCCACTAAAAGAAACAAGCAATCACCAGGACAGGATATTTCACCTTATAAAAAAAGGGACTCTTTGCAGCCAATATCGGAGAACTTATATGTATGGTTTCAACTCTCAGAACTGTGGAGCAATCCGTGATCCAGATA
583	24265	b24265	5	2.295	Fvb5	1540359	AAxAB	8.24	1	63	***	173;G/C	AATTCATGTTCCTTATTGCCATCACTACATGGACACCTCGCAACGCAAGAACACGCAGTGTCTCTGTCTCTAAACCAATTCCGCTTGTGGCTCCTGAATTTTAACAAAAGTTTATACACCCAAGCACTTGATGCTGGAATCTTATTCTCTTTCTAAACAAACACATAACTAAGGAACAAGCGTTTATATATCATATAGACGATGGTTTATAACTTTATATCTAGAAATTAAGCTAGCTTA
584	14869	d14869	5	3.368	Fvb5	2316297	AAxAB	11.89	1	42	***	166;T/C_222;A/T	AATTCTAATCATTCGACACATCTTTGTGCATTTATATTTAGGATAGATATATTTCACTGTAAGATTTGTAGAACTGTGCATTGAATTGTAACTCTCCAACTCCAAGCTTGCCCACATAATCTGGTATGGGAACCATCATTCAATTCATAAAAAAAAAAACCTTCACTTTCAACACATTAAATTGCCTCTCATAACCTCTTGTCTTCAAGCACATACTGGAAATTTCCAACTCCTCTCTCT
585	32821	b32821	5	4.385	Fvb5	2626805	AAxAB	2.04	1	49	-	203;G/A	AATTCATAACGACGTACGTACGCTACATGTAGCATGAAACGTGACAAAATAGTAGTGCCACATAGTATTATGTATTGCTCTTGAAACATCACCTGAATTTGAAGGTCCAGAGCACACATCTTGAGAACCTGTGGCAATATCAATCCCACATAATCTCCCGCTTGCTTCGCATAGACGACAATCGGGCAGGTTCCATGCCAACCAAACACCATAGTTAAGATCCCACCCGTCAAATGAACC
586	19324	b19324	5	5.624	Fvb5	3731885	AAxAB	0.03	1	5	-	106;T/C_136;T/G	AATTCCTACACTGAGATTGAAGCCGAGCTTGCCAAGGAGGGAAACTCGTATCGCATTGCCTATTTAGTAGAAGGAGTAAGTCTCATTATCTCTCAAGAGAGCTGACTGATAATTTCTATGGTTCAATTTCAACACATTCGTTTTTCATCTGCCTCTATATACTTCAGTACGTAGAGCAGTTACAGAATGATTATGTATTTTGTTCTCTGATGATCAGATGCAATGTCAAGTTAGAGCTTA
587	1983	a1983	5	6.817	Fvb4	3057150	AAxAB	9.47	1	68	***	207;C/T	AATTCTAAATCAACCAAGAGAGCCTGTCATGAAGTAGTTTTTCATCTGGAGGAGAAGCATATTGAAAAGAGGAAGAATGATGTGGACAGAGACTATGGAATATCAACAAGATGTGACCTGAAAGCGTTTAAAGCTGTAGCGTCCCGAATATCGAATGAGAAGGTATTCCTGATTCAAGAATTGGGATTTGGGCCTGTGCGGCAGTTCCGGTGCAGTGAGTTAAATTTGTCGTTGTGCAAA
588	38455	b38455	5	17.062	Fvb5	5802163	AAxAB	6.26	1	53	*	227;T/G	AATTCAAACAGATTAAATGAATAAAACGGTGATTGTGCGATGCCGAAGAAATTATATATGAACAGAGAAAAACACTAGTACTGTGATTCTGCTCCCTGATTATTAAAGGGACAGTGCTTCAAATTCCATGATCCAGTTCTTTAAAATAGTGCCATGAAGATGATATACTGATCAACCAAATGAAATAACTCAAATCTCAAAATTTACCCGAAACATTTCTGGCTACTTCTAAGTGTTAAT
589	41694	b41694	5	19.107	Fvb5	7372343	AAxAB	2.6	1	34	-	208;C/T	AATTCCTGCCAAATGCGATAGGGCCTTAAACCTAACAGAGAGACTCCGATCTCTCTCCGCCTGAGAAAACTCGCCGAACCTAAAAAACCAAAATCCAAAACCGAGAGCAATCTCGCAATTGAAATCCCTAGAGTATGAGTATCGAGCCTTTCAATAGGTAACCTCCTCATTCTTCAATTTTTCCCTCCAAATTTTCAACACTGAACGATTACGAATCTGATTTCTGTTCGTTGTGCTTTC
590	4828	d4828	5	26.572	Fvb5	7894392	AAxAB	4.45	1	46	*	31;A/G_155;G/A_215;G/A	AATTCAGGTACAAACTAGGTATTGATGCAGGACACCTAGAGTATTGGAGGTCTTCATCCAGTTGAGCCATCTGCAATGTATGGCCAACCTAATTATGGTCCGCCGTTTGCGCAGGGTCAGACACCAATGCCACCTGCAAACCAGCAGCGTCCCCCGCCACCGCCTCCCTTTACAGCACCACACAATGTAGTTACATCTGCTGCTCACCAAAGCCCGCCTGTTCCGTTCAGTGGGATGATG
591	36680	a36680	5	27.078	Fvb5	7497469	AAxAB	0.01	1	62	-	192;A/G	AATTCCTTGTGTAAGAAGAATCCTCAGGTTAAAATATATTTTTTTTTCTGCTTGAATTTATTGGCTGATATATGATTTGATTGTTATGTTCTGTCCTGCAATCACTAAATTCCTATATGAAATAAATTTAATGGAAAGTTATGCATTAGCAGCATTTGTAGTTCTTATATGGTTTGACATGATGAAAAATTTAGAAAATTAACAACTTGGTTACTGTGGACATGTTAAAGTTTTAAACTT
592	36234	b36234	5	27.277	Fvb5	8253103	AAxAB	4.94	1	38	*	162;C/T	AATTCTTATCAAAATAAAAGAAGAAACCGAGTTAGAATTAGGTAAGGTTAGAGGATGTGATGGTAAGTAGAAAATCGGAGCATGATTTTTCGTACATTTATTGAATTTAAAATAATCAAAATTCAAGTAGATAATTACACTCTCGTGCATGATTTTTGATTACGTGACGAATGATTTAGGGTCAGTCTCCATAAGTAATTTCACTACAATTTAAAACAATTGATAATGATATGTATAAAT
593	18304	a18304	5	28.404	Fvb5	11979444	ABxAC	1.13	3	8	-	98;A/G_218;C/T_227;A/T	AATTCTAACAAATATTGGCCAAAGCTGTGCAGTATCTTATCTCCTTGTTGTTGACATGTGTCAGGCCCTTATTGATCAAATCATGCTGCTTAAATTCAATTTTGGCTTTATGATGCCATGTTAAAACTTCAAGCTCATCCAGAATTATATTCTGCCAATGCATTGGTTTATATAGCTTGAAGAATTTGAATGGTAGTAGTTAGTTCTGACCATATTCTCGAGGGACCAATAAAGCATAAC
594	19283	a19283	5	30.275	Fvb5	10700530	AAxAB	6.44	1	48	*	12;A/T_32;T/A_165;T/C	AATTCCAGACATACATTCACCTTTCAGTTACATAATAATTTCCCTGCAAAGTAGCTAGCAGCATCCCTTGCGAGAGAAACATTCATGACCAAAAAGTTAAAATCTCAAGAACAAATTAATTGATTATCAAACACCACCACAGGTGGAAAAACGGGTTGAGAAACTTCGAGCATTCAAATGCTCCACCACAATTGATCAGTGTATGAAATTTTCGACATTTTAATGCTGTTTGGACATTTT
595	22710	b22710	5	33.091	Fvb5	8732082	ABxAB	0.15	2	18	-	71;T/G	AATTCACATGTATTGTACATAAACTTCTCATCGTTCTTTTGTTTATCTTCATAAGATCCGAATTGTGATGCGTTCAATGAAAGTTTGGTAAATACACCATTAGGCATGTATAGTTGAGCAACAGGAAAATTGAATTATTGTTGCGCCCATATGACAAACGACCATAGAGGAAGGACAAAGAGTAAGACTCTACATGAATATGAGCAAAGGTAGCCAGGGACCATTAAATTTTTACAAATC
596	2386	b2386	5	34.717	Fvb0	275677	AAxAB	1.3	1	52	-	191;A/G	AATTCCCAAAAGAGGTAAATTCATCATTACTCCCTTACTCCCGTACTATACAAGTAGCAATCATACGCTGACTTAAGCATCAGAGAGTCGAACACTAGGTCATCCCAGTCCCGACTGCTGACGCAGTGTTACTTGTACAGCTATAGGAACTAGAGCCAAGGATTCGACCTCCCTTCCCATGATCCCGCAAAGAGGTAGAAACATGTTTCGTTTCGTCAAGTCAAACTACCGTTAATTCAA
597	12546	a12546	5	35.818	Fvb5	11352240	AAxAB	0.38	1	16	-	68;G/T_80;A/G_172;C/T_190;C/G	AATTCTTTGTAAATTAGCTTGAACAATATAAGAAAATGATCGATCGTTGACTCATATATGGCCTAACAGTTATTAATTTAATAGGGCAATGTGGTTTCATATGCATCACCCCATTGCCACATCATATCATGTAATGTTAGAGCAAAAAAGACTAAAAAGTTCTGTTAAAAGTCATTGTAGCAAAAACATACAGAAAATTTGCCACATATGTTAGCAAGGTTCTGCCGCCTCTCTCCAAAG
598	14284	c14284	5	37.848	Fvb2	14949231	AAxAB	6.81	1	38	**	141;C/T	AATTCATGGACAAGGTACGAGCATTTCCTATTCCATTGTATAACATCTTTTGCATTGTAGCGGATGGAGAATTGCCTTGTGTGGTGCCCGTGGCGAGGCAAGCAAGGGAGAAGACAAAGGTTCTATCCGCCATGCAACTCGCCAAAGCATGGAAGAAGGGCGAGCCTACTTTCCTAGCAACCTTCAAGATGGACAAGGAGGTAGGAGGAAAGTCCGAACCTTTGCCAAAAGCAATAGAGG
599	17272	b17272	5	38.212	Fvb5	13305239	AAxAB	0.07	1	8	-	175;A/G	AATTCCCCATCTCACCACCTAGTACCTAGTCTTTGAAGCCGAATAACTGAATCATCTCACCACCTATAACTTCTATTTCGTGTATCCATTGAGAACGGCATTGCAACTATTCATTGTGCAGGCATCAAGAAGACCGTGATTCCAAAGTTTAATCATGAATAACCTCCAACACCTGAGTTGATAAGAATTTGACAAAAAATTCAAACGCAAATAACAAAAAATTTAATTTCACAAATAGCA
600	39936	b39936	5	41.99	Fvb5	17265649	AAxAB	0.25	1	1	-	50;T/A	AATTCCAGCAGCTCAATCCGATCTAGAGGTAAAAGTACACAGATGGTTAAAAGGAAAACATTGTATTGTTATAACTGACAATTAAAATCTATAAAAAAGGAAATGAGGAAAAAATTATATAAGCAACCTACATAACAGAGCTTATAGTTACTTTTTATTACCTCTTCTGGATCATTCGTCAAAGCATCAATCATATCCTCTGAATTTGACATAGAAGCAGCCAAATGAAGCGGTGTCAGG
601	12032	d12032	5	42.946	Fvb5	18915091	ABxAC	0.23	3	5	-	211;A/G_221;C/T	AATTCATGTGTGTAGGTAAAGAGTTATGAGTGGTTTTGAATATCAATAAATATGCTGAATATGTTCTTCCTTTTCAAAGTTTAAGGTGATCATCTCTTCAAAATGATAATTTCGGCTCCACGATTTTTAACGGGTTGCTCTCCAAATAAGTGAAGAAGAAGCGAACCCAATACAAAAATGTGGGTATAAGTAATAACTTAATAAAACCCGAATTTTCATGTCCAGAGAGGACATTTAATC
602	15486	b15486	5	43.225	Fvb5	14031129	ABxAB	0.01	2	6	-	81;G/T_214;A/G_215;A/G	AATTCGAGACTCTGAACTCCTCAAGTTTTAGTTGGTCCAGATAGAGACATAAAGAGAGGAAATATACGAGAGAAGTGTACAGATCTTTGTTGATAAATTTGCACTCGGTAGCTCACTAACTTTTATTGCATTCAATACACCACGGTTGAGGGGAGAGTGAGACTCATGAAACAATAATATCACAAGAAACAAGTAGAGTTGTGTAGTTTGAGTCAAGCTGAGATTTTCCTGTTGAAACAA
603	39441	c39441	5	43.301	Fvb5	18835896	AAxAB	0.27	1	11	-	180;A/G_232;C/T	AATTCCAGGTTTTTGAGTTATGTTATTAATGTGCAGAGAGTGGGAAGGGAAAAGGGAAGGGTGGCAACAGTGCGCAGAAGAGTGTGGCAAGAAGTTTCACATTTCGCGAACTTGCAGCCGCCACTAAGGGATTTAGGGAAGTGAATTTGATTGGAGAAGGGGGCTTTGGAAGGGTTTACAAAGGTCGGCTTGAAGCAGGCCAGGTAAGTTGCAGGGTTTTCCCGATATCTTACGACCATT
604	5888	a5888	5	43.438	Fvb5	17758512	AAxAB	13.83	1	46	***	87;T/A	AATTCCACTCACTCCAAAGAAATAATGATAAGGGACTGTGATAAAGGTCTTGAATCTGTCATTATTAGATTTATAATTAGTGTGAAATTTTTCTTCTTTAATGATTATATATATGCTATATCACTCTGCGGCCTGTTTATGAATTTTTCTTCTTTAATGGTTACATAATTGTGCAGACATATATATTTAGCACCACATTTCATTTCTTGGTCCATCAGTAAATGATAATCAACTAGTATT
605	42467	b42467	5	44.747	Fvb5	18324968	AAxAB	0.84	1	48	-	23;T/C	AATTCATTGATGTCATTTCTCAACTTATCTCTTTCCTCAGTAACCCTAGAAAGCTGCAATTTTAAATATTCCATTATTAATTATGGCACCAAAGCAGATGACATGCTCCAAGTTGGAATCTTAAAGATAAAGACAACAAAATATCAAAAACACCAAGAAAGATTGCAGCAATTTGTATGCATCTATCAGCTCAAAGAAATAAGCATACAACTTTATATCACATACAGGAACCAGAATTAT
606	19499	b19499	5	46.068	Fvb5	22337882	AAxAB	15.36	1	51	***	117;C/T_144;C/A_197;G/C_201;C/T	AATTCTCGTAATACCAATTTAGCACCAAGAGCAGATTCAATGCAAGCATGCATGATAAGAGGATGCACCGCATGCAATAGTCAGCCAAGATATGATCAAGAAAAACATTAAAACCATTATATTCAGCCACATAAATTTTCATTAATAAAACATAAAATCTGCTTAGGTAAAGGCGAAAACAAAGTGGCCATCAAATGCTGATAAATTGTCTCTAGATTGTGATTTTTAGCAGAAGAACAT
607	40662	a40662	5	47.06	Fvb5	13711675	AAxAB	12.79	1	38	***	184;G/T_213;A/C	AATTCTACCTTGGGGCACCTCATGGAAAACCACATTGTATTCTCTTGTGATTCCAACAGAGCTCGCCACTTGCAAGAAGCTGCAACGGCCTACGATGAATTGATCTTTGACCACCTTGGTCACTTGAATCCACACGGACTCAACCATACCAGCAACCTTAGCACCATCCTCACCATCAAAGGGTGCCTCAGCTGTCAGCATTCTCAGCCAATTATTCCAACCAATGAACCCGACAAGGGG
608	23189	d23189	5	50.6	Fvb5	17704693	ABxAC	35.09	3	56	***	25;T/C_113;T/A	AATTCTCAAAGAAGAATTTTCCAGTTAAGTGAAACAGAGAGAAATTGCAAAATTAGAAAGGAGTGTGAAGTTAGTTCCTAGCTCAAATCCTAAATGATAACTAATTTACAAGTTTATGGAAGTAGTCAAAGAAAACTATTTCACCAACTGTAGCTAAAGCAATCCAAGCAGCTGATGAAGTATTTCCAAATACAGTACAATGTAAATATAATCCACTACAAGAATACAGAATCAAACCTT
609	36543	a36543	5	56.409	Fvb5	16705554	AAxAB	33.8	1	42	***	118;G/A_176;G/A_190;T/C_202;G/C	AATTCTGATTCCAAATCAACTCTTCCTGCCCGCCATTTCGTACCAGAGGGATACAAAGTATAACCTCCACTTCATGCTGAGACCCAATCTGCTCCAGCTTATTAACAATCCGCTCCCCGTCTTCATTGATCAAATCTGCAACCTTCATAGTAATATCAAGACCATTCTTATAAATAGCTCGGAAATTATCTAAACCAGGTTAGCATGAACACCTTAGCCTTGTTGAAGCAGCTCTTTACC
610	3730	a3730	5	0	Fvb5	5146419	AAxAB	0.57	1	2	-	175;C/G_202;T/A	AATTCAGCTTCTTCCACTGTGGTGCCTTGCCATCTCCTCCTTCATTTTCACAAAACTAAACGTTAAGATTCACAACCCCATCTAAAAAACTTCCAAATAACAATACCCAAATCAGAAACAACGAGCTTCGAAAACTTGCTTGAATTGTTGTCCTTAGAACAACCCTCTTGCTCATCAATCGCCTCCATCGCCGAAACCAAAATCAATTGTACCTGAATTGAATCCACCCAGAAGATATCA
611	40877	a40877	5	0.515	Fvb5	6911745	AAxAB	0.4	1	24	-	93;T/C	AATTCATGAGAAGAGTTTGAGCGTGGGAAAAAATTCAAATATAAGCGAACAATGTTTTTAACGGTTATATGACATGAATATGGTTACAAACTCTTAACTCGACTAATATAAAAATTATTATATTTTCAATTTTATCGATCGTTTTGTTTTGAAGATTTCTTGCATTTCCGTACTTACATACTCCATTATTCCTAACAATAAAAAATTTACGTTAACATGATACACATGACCCATCTACAT
612	41693	a41693	5	2.236	Fvb5	7372343	AAxAB	14.62	1	30	***	7;A/G	AATTCCTACCAAATGCCATAGGGCCTTAAACCTAACAGAGAGACTCCGATCTCTCTCCGCCTGAGAAAACTCGCCGAACCTAAAAAACCAAAATCCAAAACCGAGAGCAATCTCACAATTGAAATCCCTAGAGTATGAGTATCGAGCCTTTCAATAGGTAACCTCCTCATTCTTCAATTTTTCCCTCCAAATTTTCAACACTGAACGATTACGAATCTGATTTCTGTTCGTTGTGCTTTC
613	36674	a36674	5	3.048	Fvb5	7821330	AAxAB	1.17	1	0	-	56;C/T_65;A/G	AATTCTTTTTATTCTTAATTTCTGCAGTGTCATGGAGCTTGACTTGCACTTACTCGCAATTCATGACCTCGTAGCACCCAAAATGTTGTGTCTCCATGTCATCCTTTTACAATCCCATCATCATTCCATGTCCATTTTGTTCTTGCGGTTGTAAGGATGTGAATAATTGTGTGTAAGTTGCTTATCCAGTTTTCCCAAAATGAAGATAACAGCTCTCAGTCTTTGAAGTTCTTTGAAACA
614	30678	a30678	5	4.058	Fvb5	8291515	AAxAB	0.77	1	15	-	25;T/G	AATTCTAAACTAGTATCAAGAAACATGTCTAAGCCTTCTCAAGATTCTGAAACTCGGAAACTCAATGACTCTGCTGTTATGGAGAAGAAAGCTATATCAGTGAAAAAGAAAGATACTGGTTCTTCGAAAAATGAAATGTCTTCCTTTGTTTCTATGGTAGAGCAAGGCTCACATCATAAAGGAAACATTGGAACCAGAAAGAGCAAGGAAGCAGCAGACAGTTCAAGCACTGGAGGAAAT
615	3990	a3990	5	5.196	Fvb5	8718906	AAxAB	0.87	1	6	-	7;G/A	AATTCAAGTAGAGTAAGTGTTGATGTTTCTTCTTTTTCTACATTCTTATATTAACAGAGCTACATCATGTGGAAGTGATTCATCCAAAATTCATCAATTATCAAGAAGGTTTCAAATTGTCTCAATAGAAGAACCTAAGTGAACACTTTTATCAAGATTCAAAATGCTCATCAAGTACATAATTCATTACATTGCTCTCTTGCACCCTTCTCCTCTATAAGCTTGCACTATCTTACATCA
616	23297	b23297	5	0	NA	NA	AAxAB	4.17	1	49	*	41;G/A	AATTCAACTTCTCCACCTCCAATAACGCATCTGAGTACGAAGCATTGATCGGGGGGCTATAGCTGGCACAAGAGATATGAGTGAAAAGGGTGTGAGTGTACAACGACTCACAACTGTTGGTGAACCAGGTCAGCAGGACCTTTGAGGCTAAGGAACCTCATCTGAACTCCTACCAGGCACTGGCAAAGGCTCTCTTGTGCATGGTCGAATCAGCGACGATCACTCAAGTCCCTAGGAAGG
617	20930	b20930	5	1.018	Fvb5	16403525	AAxAB	0.35	1	4	-	82;A/C_175;A/G	AATTCATTACATTGGGACCCCTCACACCACCTCCAAATCCCTGTTGTGGTCGGGAATGGATAGTATTAGGCATCTCAGGGGGAATGCCTTGAGGAGGTCTCATGGACTGGTTTTGCCGTGGCTGGAAATAATTCTGGTTCATACCTGCATTGGGAGCTCCTGGCCCTCTAAACCCAAAACTTTGAGACGTTGGTGGTGTCCCCATACCCATCTGTGGAGCAGGTGCACCAGCCATGGGAT
618	35699	b35699	5	1.018	Fvb7	11846485	AAxAB	0.57	1	4	-	18;G/A	AATTCATAAGTAAGAATGGAGAAATGATTGTTTGATGTTCTTACGTGTTGTCATTTAAATTTCTTGCTTTGAGTATCTCCTGAACTATGCTTTTTTGCAGGAGATTCTTTTATCTTAATTTTGTTATTTCAGCTGAATTTCTGAACTACACTTTTTGCAAGATTCATTTATGATTTTGAATTGTTGTGTTTTCTTATTTACCTTCTTTTAAATTCTCTTGCTTTTAGGTGATTTCTTGAA
619	23344	b23344	5	1.019	Fvb5	11707643	AAxAB	0.57	1	4	-	136;T/C	AATTCAAAACATGGTGCTGCAAAGTGATGGTTGCTATGCCTGTAATCTGGCATCTACATAAAATTATGTAGAAACATTTAATTGATGCTTAAATCTGCATAGCTGTTGATGTTTAAAAGATGTAGGGTTTTTGTTTTAGTTTTTAATTTGAAATATGAACATAAAGTAATCTGCTGTGTTTATTGGCAGGGTCGATTTGAGATTATTTCTCTGTCAGGCTCCTACATGTTCTCTGAAAAT
620	34992	b34992	5	1.021	Fvb5	15343106	AAxAB	0.45	1	3	-	158;C/T_217;C/T	AATTCATAGATTCCAAGAAAAAACTTCCTGAATGAAGAAGACTCCCTGGCAAAGGGATGAGGGCAAGCATTGAATACGTTACAAGCAAAAATCATGAAAAATACCAACCTAAGGGAAGCCAGCCAAATATGGGTGCCAAATTAACTGTGAAAGCAAGTCAGAGCTTGTTTTCCACAGGCCAGCCACAAACATACACAAGGCATGACATTGATCCGCACGAACTGATCAAGTATGTATCTA
621	902	b902	5	1.023	Fvb5	11458264	AAxAB	0.57	1	2	-	137;C/T	AATTCTCTAGGGTACATATTGTATTTGGTTGATTTTTTTATAACAATTAGATGCTCTTGATGAACAGGATAAATGCATGGGCTTGCTGCCAGAAGTCCAACGCCAACAAGTGAAGGATGGAAAAGTGCCTGAGATAGCAGTCACCGCCTCTAGTGATGTTGAAATGTTAGAAACATCTTCTCTTCCCGAGGTTCAAGAATCAAAGTCGACTAGTTTACTGATTCCTTCGTCCATTGATTC
622	13546	b13546	5	1.083	Fvb5	15030702	AAxAB	1.71	1	46	-	25;G/A_124;T/C_186;A/G	AATTCCAAAGCTTCAGTACCTCACAGTTTCTGCCCACACCACATTCGATCTAAACCCAAACCAGAAAACAAAACCCTAATTCCAACAACCCCATCTCACCATCCCAAACACAAAAAACCCTAATTCACCCCTAAACCCCAAAAACACACACACCATGCAACAAGCCTATCCGAAACCCTAACTAAAACAACAGAGAAAGCCCTAAAAGAGAGAGCAGGGAGATGGAACAGACCTGAAAGA
623	6378	b6378	5	1.349	Fvb5	11462983	AAxAB	3.38	1	49	-	87;C/T	AATTCCAATTCTAAATAATGGCCCAAGGCTACGTCGCCGCCTTTACGATCAATGTTTAGAAGCCCGCCTTATATCTAAAAGAAGTGACAAGAGATTTCAAGAGAAAGAGGATGGGGAGGAGCCTATAACTAATGACGTTCTGCGCCTTTATTCTTTGTTTGATGTTGCCCTGGAGAATAACTTAGCTTCATTGATATGCCACTGTATCCTCTGATGAAGTCTATACCCATTCTTCTTTAC
624	31824	b31824	5	2.317	Fvb5	17794391	AAxAB	0.69	1	1	-	80;T/G_100;A/C_153;C/T	AATTCTGTATCTACTGATTCAAACTTTGCAGGTAAGAATTAATTTGATGGGAGAAAGTTACCCAGTAGACATAGAATGCTTCCCTGAAGCCACCAGAAGCATACACAGAAAACCCACACAACCCAGAATAGTAACACTCCTCCATTTTTATTACATGCACCATTGAATAATTAACCGAAAGAAAACATCATTATAGTTCCTATCTAGATAATTAACATGCTTCCATGGTACTTTTAATCA
625	2425	b2425	5	3.164	Fvb5	18444476	AAxAB	0.01	1	10	-	77;G/C	AATTCCAGGTAGCAGTAATGACATTGTCTCTTGAATTGTAAAAATTTAAAACTTCGAAATACTATCTTTGTTCCTTCGGTAAATAGCTTGAGGAGGATTTTCAACCAAAAAATCTGAAACTTGAGTATGAGATCAAATGCACAACAAGATCATGTCAAACACATGTAAATGTTTAATATTCATGCATGCATCAAGCATTAGATACTTCAGCTTGATCTGATATGCTTGTCTTACCTTGGA
626	5186	a5186	6	0	Fvb6	601156	AAxAB	25.51	1	47	***	5;A/G	AATTCATTTGAGAAAATGTCACCTCAATAAGAACATGAGAATGTGATAGCCCTGAGTTCTTGGGATGATAGATTAGTACTTGGACAACCAGCAGCATGCTCCATTGAACCTCAAGAGCTCTAATGACTCGAGCACTCCTGCATGGCTAAAAATGGTTTCCTGGGTTCTTGCAAGGTCTGACAAAAAATCAAAACTATGCTCTCTCCTCTCAGAAAACTGATTTCCTGGCCAAGTTTGGGT
627	27066	a27066	6	13.423	Fvb6	669693	AAxAB	0.83	1	0	-	158;T/C_238;T/C	AATTCACGACCGCCATGACTGCTCTCGCGAGCTTCAAGAGTATGAGGAAAGCAGCCCAAGAAATTTTTCATCGCCTACGAATGTATGCATGTCTCCTACGTTGATCGATCTCTAACTGTTATCTATATCGATCATGTTTGATTAACCTTCTTTCTTTATTTGTTACAAAAGTTTCATATGGTGTGATTTCTTTCATTTCTTCGGTTACCCTTCTTGTAAATCCAGTTTCATGACTTGATG
628	8719	a8719	6	15.282	Fvb6	561802	AAxAB	1.07	1	11	-	128;C/G_132;C/T	AATTCCACAAACCTGGTGTTAGGCAGAGTTTTCCATTGCCAATATTGAGGAGTATCACCCCAAGCAATCCGAAGGCACTTTGCAGCTATCATGTAACATTTCTTTCCCGTCCATTTTTCCAGAGAAAACCTCCACGTACATGATGTGCGTTAGTTAATGAATACATGATACACGATATCCGCAACCCCAAATGTTCCAAGTTTCTGATAATATAACAATCGCTACCATTCATATCAAGCA
629	3190	a3190	6	15.361	Fvb6	1260087	AAxAB	0.85	1	2	-	64;T/A	AATTCCCAGAAGGATATTCGAGTGTAGATTCTAATTTCTAACTCCCATGCATGTTTCTTCCAGATAGAGATAAACCAACTCGATTCCATCGGCAACTATTACATAGCAATGAGCAACTCTTGTTTAAAACCATATGAACGTGCTTGTTACTCAAATGTGGATATGCTATTTTCAAATGGTTAGGAATCAAGTAAAGGAAAGCACTTCTATGTCAATAACTAGTACTCTGATTCTCCCCTA
630	30666	a30666	6	16.169	Fvb6	956950	AAxAB	5.24	1	44	*	216;G/C	AATTCTTCTCGGAAGTGTCTTAAGTTCATGGCACCCAGCTAAGCTCAAAAATACAAGGTTTTCGTGACCTAAAATGGATGGGTGAACCTCAGTGAAACTTGGGCGACCTCCAATAATACCCCCTCCCATAACTAGGCTCTCAAGATTTGGCACCTCAGTCAAGTCGGGAGTCTCTTTAAGTGGACAGCCAATCAAATTGATGATTCTCAAGTTGTTGGCACGCTGCATGCCAGCACAAGC
631	31254	a31254	6	16.954	Fvb6	606163	AAxAB	2.32	1	48	-	64;G/A	AATTCTAGACCTGGAAAAGAAGTTTAAAATTGAAACACCAGATGAACCTAGGAAAATGTTAACAGATTCTCTGACATGGCCAAACCTCAGGACTAAGAAGAAATATTAAAGTTGTTTCAGTATTCCCTCAGTCAAAGGGTCACATGCAAAAGGAGGTCGTTTGTTTGTGTAGCCCCAACTTCCCTCCCATTCTCGCCACCCACACTGTATTGCCTCAGTAGGGTTTTAGGGAGAGAGAAA
632	12309	a12309	6	23.958	Fvb6	3217682	AAxAB	0.77	1	15	-	28;A/G	AATTCAATTCATCCATTAGTAATGTCACACATGAACGGAAAATTTTATTCCTTGCAAGACGTAAACAACAACCTCACTAACAAGGTGATCGATCGAGGCTATAGCCAAATTGGGATAATGAAAACAAGCTAGCGTGCACAGACACACGAATACTAGCTAGCACTTTTGCAGGCAAGGAATGCCAATTGCATTTCGTAAAGGCAACAAGCTTTTAACCTCGCTACACTTTTATTCCTAGCT
633	11775	a11775	6	24.054	Fvb6	3258001	AAxAB	0.83	1	0	-	66;C/T_101;G/T	AATTCAACTCCAGGACATAAATCATATAGAATTAACTCTTCAGTACAATTGAATTACCAAAATCGACGAAAATCAACAAGGAAATGAACTTCTAAACCAAAGTTGGGGCAAATTTCGATAAGCCGAAGTTTCAAACAATATCGAAAACTAATACAGGAACACTCCAGAATCAAAATCAAGCAATAAGCAAATCGAAACCTAACTATAAGCCAAAACTAAGATGAAATTAGAAACAGCAGC
634	8991	a8991	6	24.266	Fvb6	2853510	AAxAB	0.69	1	1	-	30;G/C_78;T/A_157;G/A	AATTCGAGGTTACAAGTTTCTTGACAGTATGGCACCCACAATGCTCCTATTCACACCTGCATAGTAAACAATACATAATGCTTACAAAATGGTGGCCACAGGTTTTCTAGCATCAAAGATGACAATACTATCAAAAAGCTTCTATGAGATGCCGTCAGAGATTAAGGATATGGGAACCAATCTCACAATTTGACATAGCAATGAACTTAAAGAGAAGTGGAAATTGCTCCTTATTAAACA
635	16266	a16266	6	28.563	Fvb6	4380951	AAxAB	1.81	1	37	-	64;T/C	AATTCCATCACAATTGTACACAACGAAAGCCAGAAAATTACAGAGTCCAAGGTCTGAGGAACCATGTGAAGTCGGCCAATTTTGCTACATAGGAGTACAGACATGAAGATGAGGCCAGCGAGAATTGAGGTTTATGAAATGAGGCAATTGCCATAATTACAAGTTAAGTAACAGCAGCAGCTGGCCGCAAATGGAGGATCGCATAGGAAAGTACATTCACCAATTCAGCTAGGCATCAAG
636	24754	a24754	6	29.331	Fvb6	4522360	AAxAB	0.14	1	33	-	115;C/T_184;C/T	AATTCTGACCACATGCTTTATGATTTCTTTGTTTAGGAAATGAGCCTGGGTAATATTTGGCAATTACGTTTCTAAATTCTAAAGATCTATATATATCTAATCCTACTTTGCTATACCTAACCTTAAACCCTTATTAAGATCAGGTTTTGATTTGCATCATAGCCTTGTTGCTAAAACTTGGTCTCAGTCCTCTTACTAATTTTTAGCCTCAATCAAAAGTTTCAATTTGGGAAAACTCTA
637	10831	a10831	6	31.285	Fvb6	5045997	AAxAB	2.72	1	51	-	30;G/A	AATTCCAATGAGGAGATTGTTTCCGAGTTTGAGAAGGCTCTAGAGTTAGGGAAGGCCAATGGGAGGAGAGTTAGGCTAGCTGTGATTGATCACATTACTTCGATGCCGTGTGTTGTTGTACCTGTTAAGGAGTTGGTTAGGATTTGTAGGGAGGAGGGTGTTGATCAGGTTTTCGTCGACGCGGCGCATAGCATTGGGTGTACTGAGGTTGATATGAAGGAGATTGGGGCTGATTACTAC
638	37777	a37777	6	33.506	Fvb6	5409697	AAxAB	0.47	1	40	-	108;C/T_188;C/T	AATTCAATAGATCGCTTATTGATTAAATTTAGAAAAACCCCAGATAGAAGAGCCCCCTAATTGTTTTGAGGTTATTATATGGTTGATATTATATAGATCGTCTAGGATCGTTCGAGTTTTTATAGCTAGTTTTCCATGGTTCAAATTTTTTCGTGGTCTGGAAGGGCAGATCGTGTTAATGTTATCTTCAGTGATTAATATATGACATCATGTTCTTTCTGAAAAACAAAATATATACAT
639	20738	a20738	6	33.666	NA	NA	AAxAB	18.26	1	39	***	90;C/T_125;G/A	AATTCATAGAGTGGAGAAAGTATTTTCAATTTTTATGAAGAAGAAGAAGAAGATACCAAGTTATAGTACATGCAAACGTAATTTAGATACCATTTTTACCAGGGTCTAACAAAAAAATGCAGAAAGTCATGTTACTCTAACACCGAAATTGAACTTGTATACGTAGTCCAGAAGTTTCTAATGGTTTAAAAACATGTGGCATTTTCACCAACAAAACTAATAACTAATAAGTGATGATAT
640	10637	a10637	6	34.414	Fvb6	6238937	AAxAB	1.18	1	2	-	172;T/G	AATTCTGATTTCAATGGTTAAGATCAAGTCGAACAAAAACCTTTGGTAAAGACGATCAAAGGCAGCTATTGAACAGATAATGAGGCTGCACTTAGGTTAACTAAGGGCACTCATGTCTTTTCCCCACCATAAAAGGCTATTTTTCATTCATTTTCAAAATATAGGTCAAAAATCAATTTAGAAACCAAACAATGGTTATTTATCAAAATTTCTCATGATTGACATTACTAGCTTAAAATC
641	40358	a40358	6	39.679	Fvb6	6598061	AAxAB	1.78	1	1	-	12;A/G_218;A/G	AATTCGAATTTGAGTGTGTGATGATGTATATTCGAATTTGGGAATGAAGCGCAAGACCTTCATGAAAAGACTGGTCTATAAATCAACTTTATTCAATTTAAAGTCCAACCTTTCTCTTATAAAACTTGCATGGTCTCCATGTAAATGCACCAGTCCTGCGTTTTAATAATACAGATGAGAATACCATCCCACCTACCAAAAATATTAGCCATTGAAGCAGTCGCGAAATTTCTTTTGAAA
642	31697	a31697	6	39.747	Fvb6	6602359	AAxAB	0.9	1	10	-	170;A/C	AATTCATGGTACGTAATTAAGCTCATTCAATTGCAAATTAGAAATTCATAAAGTTAAATTAGTTAATCAAATTATTAACCTGTAAATGACTCTTGACATGCGCAATACTTAGCCCCTTGATGTTCATCAGCTGAAGAACCATCTTTGGTGTAGCTCCTGCACCAAAAATCACCACACAAGCAGAGAATAAGATTCATTGATCGAAATCCCAAAATGAAATTGTATACTCGATGGATTGAT
643	23549	a23549	6	40.37	Fvb6	6737905	AAxAB	1.04	1	7	-	62;A/G	AATTCTCAGTCATTATTGTTTGTGAATTGTGACGGTGAAACAGAGAAGGGAAGGGTTACGAGAAAAGTGAGAGCAAGAGAAAGGTTTTAATGGCTTTTCTAAGACTTTGTGGGAGGAAAAGTTGAATTGTTTGGTCGTTGGGTTCACATTGGAAACTTGAAGGAAATGTGGGTGTCTGTGTGTGTGCGTGGAGATACGCGTTCTTGGGGCGCGTTTGGAACGTGTGGTTTTGGGAAGGCA
644	13809	a13809	6	40.413	Fvb6	7191702	AAxAB	1.91	1	11	-	217;G/A	AATTCCATGGTCGTATACGTATTAAGGCCCCATAGCTCACCTTCTGTTTTATTTTAAGGGAAATCCAAATGATGGTATTGTGACGTCTAATATGCCAAAGATTGAGGCAGTCTAAGCAATCCCGTAGTCGGATCGATGGCACGCATCAATTTTAGAGACTTTTACACGTCTACATCAACACAAGCGTGTATAAGAATTTCAAGCTTAAAATTTATTCGAGTAAGCTTTATATTAAAGTTC
645	11447	d11447	6	42.756	Fvb6	8002925	ABxAC	3.87	3	18	-	12;G/C_191;A/T	AATTCTTCATACGCAGATGAGTTCATTGTCGCTTTGATTCAGTTCGCAGTTGTCTCTGTGTTTCTCTCCTTGTATGAACGAATTATGGGGACTGGGGAGCTCCAATTTCCCAATATTGTTCATGAAGCTTTGGTTGAGAGAATCAAGTCTTCAGGTTGTTACAGATGGATGATAAATACAAAAGCAAGAAGATGTTATGTGCGATAAAACAGTGTAAGATTGATGGGTGATACTTGATCT
646	8922	b8922	6	45.381	Fvb6	8165622	ABxAC	0.78	3	28	-	64;C/G	AATTCAACTCCAACTGTGTATAGCACACACTGCTTATAACATAGAACACCAAAATTTCATAGCGGAACAAACGAGATCCTCTTACTCTTCAGGCAAATTTGTCTCATTGAACCATCTAGGAGGATCATAACCAGAACCACCTGCCAAGAAAAACAATCAAACTCACATAAACTCAAAGACCCAAAATCAAATAAATGCCAAGAAAATCAAAGAACAAAGAAACTACCTAGAGGATTGCAG
647	42519	b42519	6	46.079	Fvb6	8129475	AAxAB	18.58	1	36	***	128;A/T	AATTCGAGTTTCTGCAACTAATCAAGGAGTCGGTTCTTTTTCTCGACTCTCTATTCTCTCTCCTCAGTACAAGTGTACAACTCCATGGCTGAGTTTCTTACTTTTGCTGCCCAGGAATTGCTGAAAAATGTGGCTTCACTTGCCACTCAAGAGTTCACTCTTCTATGGGGATTCAAGGGAGAATTGGCAAATCTGCGTGACTCACTGCTCTTTCTTGAAGCTGTGCTACGAGATGCGGAA
648	30608	b30608	6	46.898	Fvb6	7527545	AAxAB	10.38	1	64	***	53;G/A	AATTCAACAGCATTAAGGCAATGCTACATAATACAGATAGAATCAACTGTCAAAACTGTTTCTTTCAATTACTGAGTTGTTCACAAATATTGATACGAGAAAAGGAATTATATTGGAGCTAATCTCAGTGTTCCTTAAAACAGAAAACACCCAAATTCAAGATCCGAAAATGCCAACCAAATCATTCCGAAAACCCAAAAGAGAAACAACTCCAAAGATTCATACTTCAGATAACAACTG
649	13742	d13742	6	46.909	Fvb6	8589334	AAxAB	12.3	1	51	***	141;G/A_206;G/C	AATTCTAAATATGGCTCGAATCTTCTATGTTTTTACTTCAATCTTCACATCCATCACCTTCATCTTAGGAATTGTACACTTGATAAGGAGATACGATGGTGAAGCAACTAATAATGTGATTTGCTGCTATAAATCTAATCAGTTTAATAAACAAACTGTCTTACAGAGGTTCATCCACATTCTGTTTGAAAAGGACTTGGAATCATGTCACAAGGTAACAATGTCACGACTACTGATAGT
650	11745	b11745	6	49.516	Fvb6	9037705	AAxAB	0.45	1	3	-	184;G/A	AATTCAGAACCTGGCCCTTTTAGTTTATGTTCAACGACTTGCAAGCCCAACATTGGAGCTTTAATTAGAAAAGCTTTAGTAACCAAACGTCCTAACCACAACTCCACAAGGCTCCAGATCTCAACAGTATTTATTAAAAGCAAGGAACCCAAAATCCCACAGATCTAATCCCACACACTTGACTATTTGTTTTCCATTTATTTCACAATGTAGTCTTTTAACCATTTTTACTATGAAATC
651	12018	a12018	6	57.43	Fvb6	12086137	AAxAB	1.3	1	52	-	10;G/C	AATTCTTGAGGATTCTTTTCAAGGATTTGAGGAAAGGTGAAGGGACTAAACTTTGTGTATTGTCAGTGGTTTATGTAGACACGAGTTTATGTTAACGCTAACATACTCTAAGATATAAAAGCAGTCTGCTTTCATAAATGGTGGGAGTTAGATTCTAAACCAAACCCACTGGCTGAAGAGGCCCACAATATATGTTTTGAGATGCAAGCTTAGAACTTCCAGATGTGGAAACTCATCTTA
652	1999	a1999	6	59.795	Fvb6	9644982	AAxAB	1.53	1	51	-	86;A/G	AATTCGGAAGAAGGGCTGGAGTTTTTCGAGTTGATGAAGGGAGTCATGGAGACGAATGGGCTTGCCAACATGGCGGACTACTTTCCATGGTTGAGGTGGTTTGATCCACAAGGTGTGAAGAAGAGGATGAAGAAGGATTTGGCAAAGCTTCTGGAACTTGCCTCTGGTTTTGTGAAAGTGCGGTTGCATGAGAGGCTGTTAGTGGGTGGAGAAAAAACTAATAAGGACTTCCTAGACGTG
653	6708	b6708	6	60.477	Fvb6	18583573	AAxAB	0.7	1	3	-	39;T/A	AATTCATAGAAAGATATTCAAAACCCAAAGCTCCTCTTGACCCTGTTGGCATAATTAGCATCATTCAGTCTATTTACGTTATGGGTTTTCACTTCGAGTCTTCTTTTCATTTCCACAGTTCTCCTTCCATGTGTCATTTGTGCCGCTTATATTTATCTCTAAATCATTGTGATTACACATAAGCGTAGACAACTACTCCATCTTCCCAAACTTGCACTCTGCAGTCACAACTCATAATCT
654	14812	a14812	6	61.916	Fvb6	10472721	AAxAB	0.17	1	2	-	47;T/C	AATTCATCTTCTTATCACAAAAAAATGAAGCAAGCCCAACAACCCTCTCACAAACCCTAAACTTGATTACCATAACAACTCAAAACCCAAATTCACTACAAGAAAAAGAGAATCCACAAAGCCACATACATCAATTCTGATACATAGAGAGAAACAGAAAGAGCACCTGAATACAAGTGTCGGTCATGTGAACGCCATCCAAGTTCGTCGAGGAAGAAGAAGAAGAGGAAGGAGCTTCTT
655	6274	a6274	6	64.21	Fvb6	17685408	AAxAB	0	1	5	-	195;A/G_236;G/C	AATTCCAGTCTGAGGGCGTGATCTTAACGCGCTGCCACCCGCGTCTTGGGTAAGTGGTACGAGCAGAGGCACTGAATCAGAATGATCATGATCGTTCAAATTGGAGATGATATCGCTGTTGGAACTTTTGTCCTCTTCCGAGACGCAGACACTGGCGTACGGGTTACGTCACCATCCAATAGGGTACCGACACGCAACCCAAGCCCAGAATAATCACAGTTAACTTTTACTGGTCCGTAC
656	12272	d12272	6	66.371	Fvb6	12991202	ABxAC	9.64	3	55	*	13;G/T_53;C/A_189;A/G_206;A/G	AATTCTAGAAGCCGTAAAGTTGTTCTCTGAAATGCAAGCTTGTGGCCAGCTTCCAAATGTCAGAACATACAATATAATGATACATGGATTTTGTCTTCATGGCTTATTGATTGAAGCAGAAAAGTTGCTGAGAGAAATGGGAGGGAAAGACTGTTCTCCATATGGCTGTATCTATAACACCATTATTCAAGGGTCGCTGAAAAACAATTAGACATCATGGGCTAAGAATTTTTTTGAAGA
657	43167	b43167	6	66.701	Fvb6	15643783	AAxAB	0	1	7	-	89;C/T	AATTCCATTAAATTAAAAACTATTCTACCCTTGTCTAGTTGACAAAGGGACTTAGGTTTTGTAAGCTTCACTCCCAAGCCTTTAAATCTCTCCCACACAAACACTTGAAGAAAGAATGTAGATACTAAAGTGCAAATGCCATACTGCCCTGCACCTTCCCTCTCATCCTTTGCAATCTGGTCAAGCTTCTTGTACAAGTGACTGAGGAAAAGAGGAGCAAGCGGAAAACGAACCCCATCA
658	7050	c7050	6	67.041	Fvb6	13279605	ABxAC	3.59	3	44	-	162;T/G_163;A/T	AATTCATCTCCTACATATCCATTACGACTCGGCTTTCCTGTGGGAAGCATACTAGCACCAACACCTCCAAACATGCAAAGTCACCTTCAGGCCTCCTATAACTGCTTCCAAACCCGTTTGTAAGGGTCAACCAGTGGTGGAGGTGCCAAGACATCCCCAATTTATATATTTCGAAACAAAATAAGCACACTATTAGTAACGGAAGTACCTTCATGTTAAAATGTCAAATTGGTAGATCCA
659	1847	d1847	6	67.237	Fvb6	18244925	ABxAB	1.44	2	3	-	150;G/T_208;G/A_224;T/A	AATTCCCGATGAAGCAGTCACATCCTTCCTTCTCGACACGACGACACCAGCTCCTTCTAACTCGATCTTCAAATTCCAATAAACGTCAAGGTAATGGAGTACTCAAGAGACAGTTGAGCAAGTCACCAGTAAACATGTACTAAAGACAATTTTTGGGGTTTCTGTAAATATGCACTCAACTGAAGAATCAAAACTGATGTAACTTTTGGTGTTCTTTCAAGAAAATTTTTGCAATAAATA
660	7999	d7999	6	68.45	Fvb6	20105189	ABxAC	3.33	3	12	-	184;T/C_222;T/A	AATTCCATTTCAGGTTGGGTATTGAATCCATCTTCTGCATGAGTGCACCTTCAGATGAAGGTTAAGATACAACAGATCAGTTTATTAAGTATAACGGGCTGCAATAGGTTGCAGCTCTAGACAATGATTCTTTGCATTGTTGTATACTGATAATTAGTTAGCAATACAGTCCATCAAAAGTTGGTTTAAAGAGACGAGAAAAGAAAGTGGCATGGGTCTTGATTAGAGCTATGATGCCAT
661	36413	a36413	6	68.886	Fvb6	19151704	ABxAC	0.49	3	7	-	89;A/T_118;A/G	AATTCCTACGAAAACAATAAAGAAAAGATATTTACAAGTGATCAACTTCATTCCGAATATATAAAATCATGTAAACAGATTGTTTCAAAAGAAAATTCTCATATACCCTAATTTTAATAATTTTTTTCTGCTAACAAAATAAGAATCTAAAATTCCCACTACAGAGTACACTGTAGTGATTTGTTCACTCTAACAAATTTTCCAGCTTTTCTATTATTTTTATGGACAAAACTGCTCTCC
662	30786	d30786	6	69.091	Fvb6	12648830	AAxAB	8.34	1	51	***	39;A/T_167;A/C	AATTCTATAGAACTTCCAAGCTTTATAGACTTTAGCAAATCGTGCAAAATGAGCTAGAGTTCTCTCATTTGAGTAGAATTGACTGTTGCAAGATGGTTTGTTTCCCTAGTTTGCAGAACAGAGATAGTTAGATCAGCAAATGATAAATAAAACCATACATGTTTTTGAGGTACAAAAACATTGAATAAAATTATTAGACAAACCTTCATTCTCTATCGGCATTGCATACTTGTTTTTATC
663	11002	a11002	6	69.353	Fvb6	20150733	AAxAB	0.01	1	4	-	24;G/T	AATTCACTCATAAGTTAGCACATAGAGTCTGCAATTGCTAAATACTGAACAGCATTTCTAAATTTACCTCTAATTAACACGGAAGCCTTATTTTTATTTTTATTTTATCCTCACTAGGAGCACAGAATGTAGGAGCACAGTGATTAGTATATTTATTAGGTGTATCATCATGGGAAAACATACCACTCATCTCCGATTCTGGTTCCCTTTTAACTGAATTTGGAATTGTGTTGGGTCTCA
664	29308	a29308	6	69.688	Fvb6	19690180	AAxAB	10.8	1	56	***	19;G/A	AATTCTATATAGGCTATACGGTGTCTAGGAACATTCACAATTATTAAAACCAATGAGGAGGTTATACCTATTGTTACAGCTAATTCCTTCGCTTTACATCATCTTTAAATACCTACAAATCGTAAGATTGAAAACATGAACAAACATAAAGCAATTATAGTAGAACAAAATATGAAAAGTAATCAACTACATCCATCAAACTGTAAAACATGATAGCCATACCTTCATACCTTCCCAATC
665	31451	a31451	6	70.642	Fvb6	21266568	AAxAB	0.11	1	3	-	82;A/G	AATTCCTTCTTAATAATTGGATAAGTATAACTAGGGTGTAAAGGAAAAGGACTTGCGATAAAAAGGAAATTGTATTGATCTGACATTTACCCGCAACTACAACAAAAAATGAGGTGTGGGGACAGGGAAACCATCTGAAATGAACTCAAAGTATATGATCATCCCTGGTCAGGAATTGCTCATTTTTCCTTTTTCAATTGTTTCTTTGGAGGCATAGATGGCCTAATCATACAAGAGCCA
666	6103	a6103	6	72.05	Fvb6	23728138	AAxAB	1.35	1	20	-	17;C/T_66;A/C_67;G/A_174;T/G	AATTCTTTATTCAATTTCGACATAAAAGAAATGAAATGTTAAATTCTTGAGTAGTCTACTTCCCTTAGGCTGCAGAAAAGATGTTAGTTGTGTATATACTTACTTCCAAGAAGCTGGAAGAATTGGGTAATTAGATGGTTAAGTCTTGCTGAAGAATTAGGTAGTATGGTCGATTACGATGTTAGGAGCCAAAGCATATATAATTGTAGGTTCTGGGCTTTTGTGTTAATGGAAGTTGAA
667	13446	a13446	6	72.81	Fvb6	23105538	AAxAB	1.25	1	48	-	227;C/G	AATTCCTTTAAAAGACCGATTCCATGTAATAACACGCATCACTCTAGCAGAGTGATCAATATGCCCTGTAACAAAGAGTAAATGTAAAACAAATATCATAGCAATGCCAACCTGAGAAAATCAGTATCAAAGAAATGGAAATGATTCATTGATCTTGCTCAGTGCTTACCCCGATTATCGGCAAAATTAGAGTGATAGTGGAGCCTGGTAGCCTCCAACATCTTAGACACCTCATGAGCA
668	43150	a43150	6	73.455	Fvb6	23184908	AAxAB	0.25	1	1	-	45;G/C_83;C/T_172;T/C	AATTCCTTCCTATCGTAAGAGAAATGGAAGTCTTTACGTTTCTTTGTTATCCAATGAAGAGCACCATTGCAGTATACGGCGCCCAACCTGCTCTTCCAGTTGAAGTTGTAGGACTGGCCGTGGAAGAAAGGAGTCTCAAGATGTTTCCACTCTCCAGTTTCAGATGAATATATGTCTGTTTTGAGCTGTTCCTCCTTAGAATACATCGGGTGGTTGAACACACAGACAACCTTGTAATGA
669	1217	a1217	6	74.124	Fvb6	26404695	AAxAB	0.5	1	17	-	14;A/T_67;C/A	AATTCAAGATTTCAACTTTCTCCCACCTAATAACAGTCCCTCAAAGCAATTGCACCTAATCATTATACTAGACAAAAATTCCAAAGAAACAGAAAGCTATCTGAAACATTCTTCTCAATTCAAGCACGACCATAGAGGAATTAAGAGCCAAACCTTTAACAGGGTCAATGCCAGAAACATCAGCACCTTCCCATTCAGACCCATTTATCAAACCCTTAGCCAATTCACTCTCACTCTCCG
670	40828	a40828	6	75.712	Fvb6	25867451	AAxAB	0.69	1	1	-	51;A/T_71;C/G_136;G/C	AATTCAGCTCATGCCTAAAGATGGATGTTCAAGCCAGATGTATATATAGGCATACGACCACATCACGATGGCAAGTATGAGAGGCAACTTGAATGAGCATTACAACAACTCTATCATCGAAATGAATCTTTTACTTGGTCATGAATATTGATAGTGATTATCAATCGTATATGCAACATGTCATTGATTGTTGATTACAACATGTAATGCTTGTAGTCACATGTGTCATGTGCTTGAGAG
671	4207	a4207	6	76.381	Fvb6	24517492	AAxAB	5.73	1	27	*	110;A/G	AATTCAAATATAAATTCACATTTCCAGATGTACTACCCCAGAAAAGGACATAAACGTGAAACATACAAGAGAACTACCAGTTTTTCCATTAAATTAAAGCATGTTGATTTATTGAAGAAGAAGAAGACACCAAGCACCACCATGCTGGAATCTTGGTTGGTACTTTGTCAAAACCTCCATCCAACAAATAAGTCTCATTAGAAAGCATCATTGTCACACATTCACAGATTATATTATCTC
672	20056	b20056	6	82.25	Fvb6	28621878	AAxAB	0.17	1	51	-	15;A/T_25;T/C_216;A/C	AATTCCTACCCATTTAATCAGTATATGTAATAGAAAAGAAAACGAACTAACAAAAAGGGTTGAGAATTGAGATATATACCCTAACGCCAGCCCACCAATCAACGAGGCCCATCAGAACCCGCCAATCCAATTCTTTAACGACGCCGTTTAACCTTGTGTATGCATTCTCCGAGATCGGCCAAATACAAACGAAGCAAATCGCCTGAAACAATTGAAAAATTAGACTAAGAAAAAACAAGA
673	5986	a5986	6	84.347	Fvb6	25740998	AAxAB	0.7	1	30	-	73;C/G_190;G/T	AATTCATATAACACGTGTTTCCCAGATTAAAAAGACCAGCACTATGACCCTGAAAGTAAAAGTAACATAGGGTCAAATATTTCAAGGATGAGCCAAAAGGAAACTGATAACAGCAATGTAAAATTCAAAAGTAAAGATATAGGAGAAGTTTGCAAGTGGCTATCACAGGCACAAAGCAATGAGAGCAGAAGGTCGATCCAAAAAACTTAAACTTCATATTTTCATACAACCACATAGAAC
674	39499	b39499	6	84.728	Fvb6	28699887	AAxAB	1.77	1	18	-	93;T/A	AATTCAACCAGAGCTAGAAGACTAGAAGTCCAGAAATTATATATTTCGAGATAGAAAATACTCAAAATAGAATACAACTACAATTACGTTGGTTAGTCCAACTAAGAATGAAAAATATTCAAGCTACTAAGCACTAGTTGCCTCCAGTTCTATTGTAGTACGTGTACTATCATGCATTGCAATTGAGTTGCCACGCCTTGTGTTCGTGGCTATATAGCAACTGAGAGGACTACGATTTCT
675	23959	b23959	6	85.616	Fvb6	29198572	AAxAB	0.7	1	30	-	111;T/A	AATTCCTTCTATAGTTTCTCGTCTTTCAAAGTTGGAGCTATTGCCTCAGCCAGCAAGAGTAGCGAAAGTTCTACCTTTAAGAATAATTATAAACAACTCCTCAGATGTAGATTTTTTTGCCAAGTAGTAGACAACACTCGGATAGATATCGATCCCCCTTGAGCAAAATGGTTGGGGATAAAGCGGGACTTGCCATTCAGCCCTATAACTAAGACGACTGCCTCCCCCGCTGCCATCGGC
676	39009	b39009	6	86.031	Fvb6	30559718	AAxAB	0.06	1	2	-	128;C/A	AATTCAGAATTATGGAATTAAATGCTTGATCTCCTGATTGGAATATATTCCTGATCACATGGAATTATTATGTATCTTTGATAATTGGTTATCTTGGTTTGTTGAATCGAGTGGTTTTTCCTTTTGTGAAGGAAGGATGCGAATTACAAAAGAACTGTCATCGCATGCTTCATACAAGCAATCTACTTGCTTGAACTTGATAGACAGGAGAACAGAGATGCCGAAAATGCTCTTGCCCCC
677	36333	b36333	6	86.051	Fvb6	31748896	AAxAB	0.06	1	0	-	59;T/C_136;C/T	AATTCCAGAGAAGGAAGAGACCCACAACAGAAGCTTCTAGTTCAGCTCGAGATAAAACTTCAACCTTTATCTTCTAACTTAGGAAGTTACAGTCTTGCCCTCAAGTTAACACCTCTATCAGATTTCTGACCCATAACGAATTGGGTTGTTCCACACCCTTTTCCGTAGGACTAATTCAAAAATAATAAGTTTCTAAGACCAACAAAATCGAGCGTTTGCACACGCACAATAATAGTCGTC
678	36304	b36304	6	86.11	Fvb6	31667198	AAxAB	3.06	1	39	-	52;C/G_191;C/G	AATTCAAAGTACAATTTCATTGGTGTTCTGGTTATCATCTCCAATACTCCATGATTTTAAATCGCACTCCATAATATAAGATGGTTGGATCATATACTAAAATGATAATGGACTTGCCCAAACATCACCCCACCAGATTACCATAATTGCACGAATATTTGTCTCTCAAGTCTGACTCACCCTTTGATATAGTCTATTTCTCTAACAATGGAATTATGGAAATGGAGTTGGTTATAAACA
679	11935	b11935	6	86.571	Fvb6	31686529	AAxAB	0.01	1	0	-	129;T/G	AATTCATCAAGATCCATTTCTATTTTTACCAGAACATTCGTCGCAATAGTGTGTCCTTTTAATACATTTTAAATACATTCCAGGAGAAGCTTCACTTGTTTATTACCTGCTATGGAAATTTTGGAACTCGTACTTCATTTAAATGTCAGCCTTAGCTGATAAACAGAGTTAACAAGAACGCACTTGACAATTATCATCGGTGCTGTTTCTGTTTTATTGTATATGGTATATCACTGTACA
680	32798	b32798	6	86.977	Fvb6	15115600	AAxAB	2.47	1	54	-	218;A/G_233;T/G	AATTCATTCAGGTTTGGGTTTAACCTTGTACGTACATGTGTACATTGATGTCTTAATGGTCAAAGTAGTGTCAATAACGATTCCTGTTGATTATGTGTCATGTATATGTCTGTACGCAGTGAAATCTGCTAATTGGTTTGATGTAATTTCCCAACTGTAACGTGTCATTTGCTCTGTCTCTTTACTCTTTAGTTCAATAAATCAAATATATTTGCCCTATCGCTCTTGCCATTGTTCACT
681	19398	b19398	6	89.013	Fvb6	31814934	AAxAB	0.17	1	2	-	130;G/A_215;G/C	AATTCAAAATTGAAGAACAACAAAGAGTGGATTTTTAAGGATTTGAAGAGATGGGGAGGAGAGAAATTGACTTACAATGAGTACAGATAAGAAATGGGATCCGAGGAAACAAAAGAAGAGGTGTAAATCGGAGCTGGAAGTCTTCAAATGGATAAAGATAAAGTTTAAAACCCTAATTAAGTCTTAATTGGAACAGGGACAGAGAGAAAAAGGAAGCCTGAAACAGAAAGAATGAAATTA
682	22558	b22558	6	89.592	Fvb6	31814361	AAxAB	0.01	1	36	-	79;C/T_192;T/G	AATTCCAAGTTCAATGAGGTGACAATGCAGGAGATTACTAAGATGGTGGCCACCAATTTGTTTCGGACTTTTCCATCCCCGAGTCATGAGAAGAAGGCTCTTGAGAGCTATGACCAGGACGAGGAGGACCAGATGTTGGAGCCTGCTTGGTCTCATCTTCAGGTTGTGTATGAGTTTCTGTTAAGATTTGTGTCTTCTCCTGAGACAGATGCCAAGCTTGCTAAAAGATATATTGATCAG
683	20667	b20667	6	90.026	Fvb6	31908285	AAxAB	0.12	1	15	-	195;C/T	AATTCTAAATCTTGCATTTGCTATGCTAGCTCTAACAACAGCGTACAGTTGATCCACTGCCCAATTGATCACATCTCTATTTTCATTTCTATCACTATACATATTAAGCTAATACAGCACCAAAATAGCCCCAAAATATCTTAAAAGCTAAGTGTGCATGGATTTGAAACCTTCTGTAAGAGGGACCACTTTTGCCGACACCTTAGACTGCAACCTTGATACGGCTTGACGAATATCCTG
684	39904	b39904	6	93.458	Fvb6	34424356	AAxAB	0.03	1	13	-	155;C/G	AATTCCATAGAATTTGGTAGGTGATCTCACAAAAAATAAATGAATTATAATAGATGGTGTGATGCACCTTTCCTTCTGACTTTTGTGCTACGTGGTAGGTGATGAAGCAGAGACCATAAGAACTCAAAAACGTGGAACCAATTCGAAAACGTGTTGCAAGTCACTGTGTGTTTTGGTTGCCTTGTGTCGAAGCTCCAAAGTCTCAGCTTTCATACTCTGACACACTAAACAGGCAAGTAA
685	33273	b33273	6	94.05	Fvb6	34081974	AAxAB	0.44	1	1	-	55;T/C	AATTCAAGAATCGAATTTTACCACCGCATCACGCTTATATCAAGTGAACTTTATGCGGTAATTTGAACTTCCTTTTATTCATTCAGTGCAAGAGAAACACAATTCTGAAACCATACATGCCCCAAAATAAAGGTCGAAACTTCATTAGCATTACTGTCTAAGTGTCTAGTAAATGCATTTTATCGTCTAGCGAAATATCCATATCTATAAGGCACATATGTGACATTACTTATCTATAAA
686	39987	b39987	6	94.063	Fvb6	34133126	AAxAB	0.56	1	0	-	58;G/A	AATTCATGCATCCTTTATAAATGATGAAAATATGAAATTATATTTGGTTCATCTTGACAGATGCTTTGATCTGCTAGCAATTTTTCCTGATGGTGCTTCTCTTTGATCATTTGATAGGTTTCTGTTTCATCCATGGATGTTGGAGTTGTACCAGACTCAACAATGAGTGAAATGTCTGTCTGTCACCCAAGAACACCGAAAGGAACAATAGACCTTTTTAATGGACCTACAATTCAGATT
687	36421	b36421	6	94.098	Fvb6	34344659	AAxAB	0.34	1	2	-	119;T/A	AATTCTGATTGCCTGAAAAAAGAAATTATCTTCAAGTTTTGATCTTTCCCTGTGTATGCATATCATCTTCTAAATTTCCAATACTTGTTTAATCTTCATGTTTATCTATTCAGCAATTTAAAACCTTTCTATTTTACCCTGTTTTGATTAGTATTCCTGATCTGTTTATAAGAAATGTGATTAAATTATAGATACTTTGTTTGCCAATTCATGGTTATCTCAGTATGTCTAGATATAATG
688	7775	a7775	6	103.725	Fvb6	33083614	AAxAB	0.34	1	2	-	143;T/A_166;T/A	AATTCTGCCACAGCAGCTGTGTAAGTTTCCCTGTAGCACTCAGCCAGACTCTTAATTTTACTGAGCTATCCGAGACACTTAGGACAACGTAAACCTCATCAATATCAAAGTTGTAAGAAAGGAAAAACGCTGATCCACTTGGATACTCTGTTTTTGTATCCTTGCCTATGAACACAGAACTTCTAAAATAGGGAAGAGTTTCCTTCCAGATAATGCCCTGAAGTGGTGCTTGAGGATCAA
689	42063	a42063	6	107.241	NA	NA	AAxAB	1.62	1	6	-	14;A/G_106;G/A	AATTCTTGTTCAATAACGCAAACACATAGAGTCTGATAGCTGTTCAAGGGTGAATTATGGTTTGAATGGAATGAAGGAATTTAGGGATGTGTGAGACTATAAAACGGAAGGAGAAGAACATAACAGAGAAAGAGAGAAGAAAGAGAACTGAAATAAATAGAGAGATTATAGGCCATCAGATTAAACCATGAACACGTGTCAACAGAGAGAAGGAAGAATTAGAGGATAGAAAGGACGAGG
690	40126	a40126	6	119.9	Fvb6	35640105	AAxAB	0.85	1	2	-	62;C/A	AATTCCATCAACCAAATACACTCCACACATAATTTAACAATCAAATTCCAAACCTAACCTAACAGCTCGTATGAACATAAACAGAAATTGATCAAAAACAAAGGAGAGTAGAATCATACTCCTTGGATTCTCTTGCCAGTCACAGGGCATTTTGGTCCACTGGCTCTCTTCTTAGTAGTCTGATACACCAACTTCCCACCTACGATTCAAAAACGCAAGTAATCCACTCAGCTCAAGCAA
691	5580	a5580	6	131.684	Fvb6	38097846	AAxAB	0.14	1	33	-	209;T/G	AATTCTCAAACACCCAGAAACCAAAACAAGTAACTTGCATAAGAACCAAGCTAAAACCCCAAATAAACGAAGTAAAGGAACCATCTTTACCAATTCTGCTACCAAAACAGAGACCAACAAGTACAGAAATTGCAATAGAGATGCAGATAAGTTAAGGGTAGGAGACAAACCTATAGAAAGTAGAGCAAAACAAAAAACCCAATAAAGAATAAGAAGCAGAGAGGGGTATTGTTCTTCGTC
692	42391	a42391	6	132.871	Fvb6	38607442	AAxAB	1.17	1	0	-	51;T/C	AATTCAATCAATCCCTCAAGACCATATTCTGATACAGCAGAAAAGTACTCATATTTTAGTGGTGTGTGAATGTGAGAGGGAAGGAAAAGGAGAAACACCAATTCAAAATTTCAAATACAATTCAAAATGAATGCATGGACCTTTGTTAGTGAGGCCAATTAAAAGAGACAAGTATTCCTCAAGCCCTCGGCGAAGTTCTGGTATAGCAGATCCATCTGCAATACAAAGTTACAAACAACA
693	6954	c6954	6	0	Fvb6	1026239	ABxAB	42.22	2	22	***	139;A/G	AATTCAATTCCTAGTAGTAATATAATATGATTCTAACATTCATCACTTTCTTAAATTACATTCCCTAACTTCTTTTATTATTTGATTGTAATATATTAATGCAATTTTATTTGGATAATAACACAGTAGAAAAAGAACAATCAGATTCCTAGTGGAATTATGACTTGACATAAAATCAACACTTGCTGGATTGGTTAGGAACAATAATCATGTTACTGGGTATACTAGGATTTTTGGTGA
694	9199	c9199	6	13.138	Fvb6	1919469	ABxAB	6.34	2	2	*	19;A/T_83;T/C	AATTCCTTAGCCCCTCTAAAGGGCAATTATAGTCATGCATAGTCATGCAACGACCACACATCTCATGGTAGCCTTGAAGAAAATAGCCTTCTGCAGATGGGGAAGACTTCATAGTCATGCAACAACCACACATCTCATGGTAGTCTCTTTCCACAGTAACATTGAAAGTGACCAATTCCATCACCAAAATATCATTACCCATCTTGGCGTATATGAAGGGGTATCCTCATGTCACCTCAT
695	32120	c32120	6	14.671	Fvb6	2625440	ABxAB	4.94	2	1	-	215;T/G	AATTCGCAGAACAATTAATTAATAATCTTATTAATTTGAGAGTGTTGGAGCTGGGAGAAGAACATACACAGACGTTTAAGAATAGATACAGAGAGATGGGAGGTTCTGCCTCGAAGAAGCGATCGAGCCGATCAGAAAGGTGCTGCAGCAGCAGGCATGGCTACAGTCAAGAATGTTTTGATTATGTTTTCGACTACTTACCCCCACGATGTTCATACTTGAATGAACCAACTGCAAATT
696	10565	c10565	6	16.974	Fvb6	14413314	ABxAB	3.41	2	3	-	60;T/A	AATTCTGGGTTTGAGTCGAAATTTCTGACTACCAAGAACAACCATCAACTTGGTAACAAATAGAAGTGCAGCCTTCCTTACAGCTGCCTTCTCATCCATACACCTTGCCCTCAAACCCAACTTGCTCCTCAACCTCCATAACTTTCTTCACCCCCTCAAGATAAGAGCCACACCCATCATCTGATCACCCACAAAAATCAAAGCAATATCAGAACTTGCGATTTATACGGAAGAATCATG
697	37372	c37372	6	17.72	Fvb6	3439282	ABxAB	37.06	2	49	***	200;A/C	AATTCCCAACAGTGTCTCAATCTAAAAGCCTGTCAACTAGAAAAGGGGAAGCCTTTGAAAAGCTAGTACAATATCGATAAAGCAAGCCACTTTGATTTAAGAATTACTTACAAATTAGTCTTTCAATAATTCCATGTAAATTAATTACTCAATTTACAGCAGAAGAAGCTAGAAGTCTGTACTGAACTAGCTAATGTACAACATACATATTATTCATTATTTGATTATCTGCATTTTTTC
698	6980	c6980	6	18.53	Fvb6	4952198	ABxAB	3.9	2	32	-	52;T/C	AATTCCCATTATTTTTGAGTCAAAAAATTTGGAGGTTTGTTTAAGATTCTGGTCATTAGTTTAAGGAAATATATATAATCTGTGTTCTGGGTTTTCTGTTTAATGATTAAGAAAAGTGTAAAGAACTAATTTTTAACTCAGACAGAGCTTAATTTAGAGGTTTTCTGGGATCTTTGGAGCCATTAAAGAATTACTTTGACTGCCCACTTTTATAGATGAGTTTTATAGACTGTAGTATTA
699	29275	c29275	6	20.105	Fvb6	5788816	ABxAB	5.9	2	40	-	210;G/C	AATTCTTCTACAAACCAAAACTCTGGATTTCATCATCGTCATTATGAACAGTGGTAAACAAAGGATAGGGCTGGAACTCTGGAAAAGAGAGAAACTTCCAACATCAAGGATTTTGCGTTGTTGCGTACCACGATTTGCATACAAAAGGGAAAGCTAAAACCAGAGACTCCATTCCGACCTTGGCAAACACAGTTGCTAAACAGTCCACTTGTAACTCCTCCCATTTTCGACTGAGAGATT
700	43792	b43792	6	21.531	NA	NA	ABxAB	4.4	2	25	-	166;G/C	AATTCCCACTTTCTTAATCACCCTTGAAACCAAGTATGGTCCATTATAGCCCCATTTGTTTCCATTAAAAGTTGAAGCAAATTCATCCAAGAAGTCCCTCAAAAGTGGATGATGTATGTCAAATATCATCACTGCACCATTTAGCCTAGTCCAATTTTTGGACTCTGAATCTATACTTTGTGCCCCGACTGCGTTCCTCAAACCAGAGAAATTCTCCAGAATTATAAAGTCTGTGTCCAA
701	22484	c22484	6	22.681	Fvb6	8167750	ABxAB	13.92	2	12	***	39;G/C	AATTCTCACCTTCATCCTTTTTCTCAACTTTGACAACTTGCTCTTCCGTCCCAACCTTTGAAGCTTGAGCCAACAACCAATTCGCATCAAGATCAACAACCAAATTTGTCTGACCAGGAAGAAACCTACTAGCCTCTTGGACCCCCTTATTGAACTGCCAAACAGATTGACTCTCAGTACTGAAATCAGGGACGTGACAACTGCTACTAGGAGAGTGCACCAGCTCATCCAGGCTACTGA
702	17171	c17171	6	23.885	Fvb6	7020014	ABxAB	61.38	2	14	***	175;T/C	AATTCCTGTCAATGGAGAGTGTATTCAGAGCTCACCCTCGCGGTTGCTTGATGATTCTCTCGAGAACCATGGACTCCAAGCGAGGTTACAGGCTTCTGAAACCTTTGCAGGATCGCGGCTTCAAAGTTCATGCAGTGACACCAGACTTGTCATTTCTGTTCAAGAACACCCCAGCTGAGGCCTGGTTTGCTGAGATGAAGAAAGGCAACAAAGACCCTGGTGAGATTCCATTAGCTCAGA
703	15993	c15993	6	25.218	Fvb7	16536931	AAxAB	1.2	1	44	-	59;A/G_143;G/A	AATTCTTGTGAACCCGATTTAAACGTTCCTTGAGTTTAAGAGTAGCTTTAATCTCCCATATTAATTTCATCCAATACCCAGAGAATAGAAATTCAGATAAACTTAATATGACGGATCTAGATGAAGAGGGATGAGGAATGAGTGAGAAAGAAGATACTGATAGCGGAAGAAGAATGATGAACTGTTATATACGCAATGGAGGAAGAATATATACACGATTGAAGCGAGTCTTAGACGGTG
704	9238	c9238	6	25.745	Fvb6	3554556	ABxAB	16.73	2	25	***	81;C/A	AATTCAAGCTCATAGTAGTTCACATTTCTTAAGCTGTCCTCTCTCAGATTTGATTTCACCAAAGTTCCCTTCACATCAGGGCGTTTGCCAGCTCCTGTAATCGTCCGAACCACAGCTTCTCCCACCTCTTTTGGTCCTCCAAAAGCTTCAATTCTACAAACAAACACAAAAGTCACTCATTAGCCATTTTGCATTTTGTGCTCATACTTGACATAAAACGTTAGTCACTTGCTTACTTGA
705	26005	c26005	6	27.865	Fvb6	240060	ABxAB	44.42	2	0	***	157;G/A	AATTCCTCTGTGCTTCTAGATGCCTCCTAAGATATTGTGAACCATTCTAGCATTAAAAATCCTTTGCTTTTATTATTTTACTCGCGATCGAGCTTAAATGACTCATGCGTGCCGTGTTTTGTAAAGCTGCTGAAAGTGTGGTTTTCATAGGTATTAAGTGAGCTTCCAAGCTTGTTTTGTCTTAGTTTATCCTCTTAATGAATGCAAGACCCTAGGCGGCTTCTTGGTGGCCCTAAGCAA
706	36097	c36097	6	28.793	Fvb6	7612172	AAxAB	0.45	1	3	-	101;C/T	AATTCCCTCACCAGTGATTGTTATTAATGTTTCTTTAACCCTCACCTAAATTCACAAGATGCTCTCCCACTATAAGAAGTACGTACATCATACCAGCTGAGCTGAGAGATCAAACATTCAAACTCCATCCAGATATTCCAGATCAAAAGAAAATGGCGTTTTTCAGGAGATTGGCAAAGCTGTTCTGCTACTTCATCTACTTCAGCTCCTTTATCACCGTAGCCAACACTCCTCAAGCCG
707	4328	c4328	6	28.842	Fvb6	10766485	ABxAB	4.56	2	1	-	71;T/A	AATTCTGCTTACCACAGGTACTCCTGTCTTCTTCAACAACTCCTGAACCCACTTTAATATTTTCATCCGCTTCTTTTGATGCATTGCTAGATCTCTGGATTGAAGCTCTTACATCTTCAAACAAATTGGCCTCAACACTTTCGAGCGTCAAAGTATCACTTTCTAAGGTGGAGATTGTATCAGTGGACCTGTAAATTTCTTCCTGAATCCCAGGTAACATCCTTGTTTCACTCTTATCTC
708	18411	b18411	6	30.251	Fvb6	9777597	ABxAB	72.83	2	0	***	168;A/C	AATTCAAATTGCCGTAAAAAATACTGAAGGTCTGAAGTTTGTAATGTAGAGAGCTAGTAGGTGCTTTTGCCTTTTTGGCAAGTCTCAACCATACAAGCTGAGTCTACCTCCATCTCAACCTCAATTTCTAGACTCCTCCATTGTCCAAAGCTCAACGCAAGCCATTATAGACTTGAAACCACTATGATTTGATTTATAGTAATATCTAATCTACACCTTTACTTCTTCAGGAAGAAAACA
709	6222	c6222	6	31.663	Fvb6	10016849	ABxAB	2.31	2	43	-	226;G/T	AATTCGAAAGCTTCTTGATGGTCAAATTTAAGCATGGAGTGATCGAGATGCCTACCATCACAATCGACGATTTCATGAGCCCCTTCTTGTTGAACTGCGTCGCCTACGAGCAGTGCCACAAGTCGTGCTCCAAGCACATCACCACTTATGCCACATTGCTCGATTGCCTCGTGAACAGTTACAAGGATGTCGAGTACTTGTGTGACAGAAACATAATGGAGAATTGGTATGGGAACGATG
710	37243	c37243	6	32.11	Fvb1	17743786	AAxAB	1.75	1	33	-	189;T/C	AATTCTGACATATTGTGATCACTGTCCACGAACTTAATCAGTTTCAGGGGTCTAAATTACTAGTCTGCATGATGTTAATTCATTTTTGTTATTAAAACTAGCATATATATGAGGGAAACTAGGTAGATCACTCACTGCAACAATAATTGGAAAAGACTTGATCATGAATACAACAGCTTGATTGAAGTATGAATATCCAGAAGAATAGATAAAAAGGATTAAATTCATATGCAAATTAAA
711	10026	c10026	6	32.613	Fvb6	15984501	AAxAB	3.77	1	28	-	234;T/C_235;T/C	AATTCTCCAAAATAAGTTGCAAGCCATTTTTCCTTTCTGCGGTTGCAAGACATTTGAGTTGATATTACAGTCGGTTACTCTGGTCTGTATGAACCTATAATTTCAGTATGACTAGCGATGGAAATCTCCGAAAAAAATGAGATTTTATAGGAATATCCCCCAGAAACATAAAATTTTATTGCAAGTGTCAGACCAGAGTCTTGAGATGCATTCGGGTAGGCCTCATTATTTGGCTTTTCG
712	33853	b33853	6	33.892	Fvb6	13368537	AAxAB	5.38	1	55	*	30;G/A_62;C/T_96;G/A	AATTCCAGATGTATGAACTGAAGTTTCGTTGCGTTTCTTGAAACGTCTGTAGAAACAACAACCGCACGTTGTCTAGCTAATAGATCAAAAGGGCCTGGTAGTGGCCACCCCTCCATAATTCTTTAAAGTTCTTGAACATTATCTGAATCTCTTCTGGTTATCTCGTCTACACACTGATCAGTAGTGAATGATTGATGCATCTGCAGGAGTACAGTACTTCACTTCTTAACTCCCCAGCCA
713	16762	c16762	6	34.254	Fvb6	12672380	ABxAB	1.72	2	51	-	55;C/T	AATTCTAGATCCTTCATTTTGTTGAAAATCTCCTCGGCTTTCTTCAAATTGTTGGCACCAACACAGTTAGCCAACAGAGTTCGGTAGATTGTTTCACCTCTAAAGGATTGTGGGATCATCTCAACATACTTCTCTGCCTTCCAGAGGCCACGTACTTTGGCAATTAAGTCCAGACGAGATGCATAATCTCTTTCAGAAAATTCAATCTGCTTATGTGCCTCCAACCACTCTGAGAGCTGC
714	35615	a35615	6	35.003	Fvb6	12749274	AAxAB	5.34	1	28	*	97;T/G	AATTCTTAGGTTGCTTCTTCCTGGTACTAGCTGTCACCTGATTCAAACAAAAGGCTTCAGGGCACCAGCAGCCAAAGATACTCAATGCTGTTACATATATAAGCCCTTTCAACTACGAGGACTGAAAATAGATAATAAAAAAGCAGCGGCAAGCATGCATAAGGAAATATATATAATATTAGAAAGTTAAAGACATATAAAGGAAGACAAAGAGAGATGGAAAAACACCTTCATATTGTT
715	20762	a20762	6	35.579	Fvb4	6062995	AAxAB	6	1	49	*	37;C/T_161;G/A	AATTCTGAGTCTTAAAGGATTAAGGTTGGAAATTGGGCAAGGAAGAAGATAAATTTAAGCCCTTAAATTTTTATGGGTTATTTATTGAAGTTTTATTTCAGTTCGAGAATTAATATTATTTTTGTTCAGGCCGTGAGGAGGTTCATTTGCAGGAAGTCTCGGGTCATCGACAGGCTTAGCCGAGCACTGTGAGTGGACCCTTGATTTAAATGTCATGCATGAAATAAAGTTTATTTAATT
716	32096	a32096	6	36.34	Fvb6	13279605	ABxAB	28.53	2	35	***	25;A/G_70;G/A	AATTCATCTCCTACATATCCATTACAACTCGGCTTTCCTGTGTAGGAAGCATACTTGCACCAACACCTCCGAACATGCAAAGTCACCTTCAGGCCTCCCATAACTGCTTCCAAACCCGTTTATAAGGGTCAACAAGTGGTGAAGGTGCCAAGGCATCCCCAATTTATATATTTCGAAACAAAACAGGCACACTATTAGCAACGGAAGTACCTTCATGTTAAAATGTCAAATTGGTAGATC
717	3656	a3656	6	38.301	Fvb6	15712087	AAxAB	0.01	1	2	-	167;C/T	AATTCTGGGATGAGAGAAATCTTCTGGAAGCGGTGGAGAAGGGGTGGGTCTTGGAGCTGGGTTCGAAGGTGGAGAGGGTGAAGAGGAGGAGGGTGATGAAAACTAGAAGCGCACAGATGGAAATGGTGGACTGGGCTTTGGAGAGAAGAACGTTGTTGGAATTGGTTCGTTTGAAGGAAGTAGAGGGAGAGGAAGTTGCTGAAGAAGACGCAGAACTAGAAGAAGAGAAGAGCATGTTGG
718	34710	b34710	6	40.073	Fvb6	24175452	ABxAB	0.09	2	50	-	176;G/A	AATTCGATCATCTGAACACATACAAATCATTTTACTACCTTAGGCCCCTAATAATTTCCATCATCACTTTCCCCCACCTTAATTTGTTCACATTCGATTGCGATCAATACCCTAATTTTAAAGTTATCGAAAGACCTAAAGGGTTAAAGATTATGGACTACTATAATCATAAGATAGCTAAGCTTTTACTTTGCTTTAACATTTAACCCATGTCCTTTAAATTATAGGAAACGACTAAAA
719	26034	b26034	6	41.983	Fvb6	17955402	AAxAB	5.43	1	30	*	54;C/T_155;G/A_180;C/G	AATTCATTTGAATTTTCTATCATAACCGTATTTCATTATACTGATCACATCAGACGGTCGAATTTTCATTTTGTGAAATTTAGCCGTTGGAATTACAACGTGGCTATTAATGTTGTATAACTTGTTTAATATGTTATATACAAGTGTACATCTTTGTGAACCAACTATACAGAGAAAACACAATTTTGAAAAATCTTGTGAAATAGAACATGATCGGTATGATGAAATACAACTATGGTT
720	12791	b12791	6	42.48	Fvb6	27725000	AAxAB	0.34	1	2	-	55;G/A_69;T/C_84;A/C_103;T/A	AATTCATAGGAATTGTTATCGGCAACTTGACCACTGTTCTCCAAGTAAATTAATCGAGGATTAATCCGTTATTATTTTCCCTCTATTAAGGGTCGTACTAATTTCGCAAGTACTTATTTTCTGTATTTGTTTGTAGGGAATATACGACTTAGGTGGGAGGAAAATAGCATTTCAAAATGCAGGACCTCTTGGGTGCTTACCTTACGCAAAACAAGAATACGACACTCAACTTGTAGTTGG
721	12750	b12750	6	44.27	Fvb2	15199284	AAxAB	10.67	1	49	***	198;C/T	AATTCAAGTCTCGTCTGACAAAGGTATACATTGTGCCTTACTTGGATCAGCCAAAAATGCTGAAGTATCCTCCACAAGACTGCAAGTTTATCAATGTAGATCATTGGACGTAATTTGTGACTGAGCGGACTAAGCCGACATTTCTTGTGAGTAGTTAAGCGAACAATGTTATTAATTACTAATTAAGTGTTTCATTACCAGGGTCCCTCATCAATGCATATGTTTACTTGATTAGGAATT
722	15734	b15734	6	51.001	Fvb6	29638774	AAxAB	0.03	1	9	-	25;A/T	AATTCCGCGCCAAGATGCAATGCAGAAGGTTCCCTAGCAAATACATCCGAAACAACAAACCACAATGAACAACAACCAACATCAGCATCCCCAGAAAATGGTCAGACATGATACCTTAAACCAATTCTAATCTGTTCCCAACCGAGTCTTTTTCTTAAGCAGACGCCAACCACATACATGCATAAAAAAAAGTCAATTTCTCATTTCCTTCCCCCATATACTAATCTACATTCCCACAAA
723	29824	b29824	6	52.419	Fvb6	30476158	AAxAB	0.18	1	4	-	54;G/C	AATTCCATTGATTCTTCAGTAGTTGCTCAGGTATGGAGTATAGTCTATGTTGTTCTTGACTGTTTGAGACATCTAGTATGTAATCTTGTGTATTTTTTTTTAATACTTCATGAAGTGCTAGTAATTAATTGGCCTTTTTAGTTTCTGCAACATTTTGATTGAATCATTTCCCTACTAATAACAGGCGATTGGCCTACCAATTATTACTGTAAATATCATGCAGGTATATGAAGACTTTCT
724	13207	b13207	6	53.125	Fvb6	31194508	AAxAB	1.06	1	9	-	173;A/G	AATTCTATGAGACGGCACCGAGTTTGGATACGATTTGTGTTTATGGTGGTACACCCATTGGAAGGCAGATGGGCCAGCTTGACCATGGCGTTGATGTGGTGGTTGGCACACCTGGTCGTGTGATTGATCTTCTCAAGAGGGGTGCGTTGAATCTATCGGAAGTTCAGTTTGTTATTCTTGATGAAGCTGATCAGATGCTTCAAGTGGGATTTCAGGAGGATGTGGAGATAATCTTGGAGA
725	38363	b38363	6	53.646	Fvb6	31616106	AAxAB	1.37	1	22	-	110;C/T	AATTCCCAATTATAGAAAGAAACAGATTCTCAAAAGGACATAGAACGAGAAGCTGCATTGAAGCATTCTCTTGAGCAACTTGAAACCAAGAACAAGGAAATTGCACTTCTCGATAAGCAAGTCAAAGACCTTGAGCAAAAATTACAGCTTTCAGACGCCAATAAAATCGAAAAGGTCTGTTTACACCTATTTCCCATCTGAACTGTATGTATATGCCAAACGCAACAGAAAGGCATGCAC
726	16653	b16653	6	55.428	Fvb6	15102989	AAxAB	1.33	1	18	-	237;A/G	AATTCAAATCTCCCACCAGAAAATTCAACCTCTCAATCTAGTAATCACATAAGCAAAACCCCAGCGCACAAACTCAAACCAACCACAACCAAATTCCCTCCCTTCATCAATCCACTCACTCCATTGTCATCCGCCGTCGCATCCGCCGAATCATCCTCTGACGGCGCATCAGCATCGTCCTCTGACGGCGCGTCAGCATCATCCGCCGATGGCGCGGCAGCCTTCTTAGGACTCGGAGCA
727	13385	b13385	6	58.676	Fvb6	32423396	AAxAB	0.69	1	1	-	51;T/G	AATTCAAACTTCAAAAGGCCTAGATAATAAAGTTGATATTGCATTAGTGAGTCCAAAAAGGCCCGAATACACAGGGAGGTTCGAAAGCCCAGGGGAAGCACAACGCACCAAGCCCAAACACTTGAATACTTGGAACATAACAGGCATAACATACTGAGCAAACCATAACATGCAGTCATGCATGAGATATATAGAAACTATATATTAGGGAACTGGTTCGTTCAGGAGAGAATGATCCTA
728	16993	b16993	6	60.802	Fvb6	33881043	AAxAB	0.25	1	3	-	182;T/C	AATTCAGATAGATACAAGGACTTAGAACGGAGGGTTGTTTTGGGATTTTGGATTTTGGAAAATTTGATGCGCATGGATTTGAGAATCCTGAAGAATATGAGTTTGGATGGGTGGGGGCCCGTAGCTAGTTAGGTACATCTCTTAATTAATTGATTTTGGAGCTAGCTTTGGACCACTGAAACTCTCTATTTATACGAAGCTCTTCTTCTTTGCTAAACCTCACCATTCAAACATACACAG
729	7260	b7260	6	68.629	Fvb6	35407011	AAxAB	0.45	1	3	-	88;A/T	AATTCAATCCCAAATTGTGCTCAGACTTCTTGTTCATATTAACAGCTGATAACCTTCTTGAGAGGGACCAATAATTATAGTCATTATGATATATATATCATCTCAATTCTTAAGGCATCGACTTAGAGTGAGTTGGAATCCCTGGTTTCTTCTCCCGTACCCTATTTCACGCTTTCTGCTAATGATGTTATTGCCATTTCTTGGATCACGGCCATCCATGCTTACCTCGCTTTTGTTCCT
730	22987	b22987	6	76.554	Fvb6	36686609	AAxAB	1.67	1	44	-	108;A/T_139;A/G_179;T/C	AATTCCGTATTGTAAAGATTTGTTTATGGTTCACTTAATTTAACATCCTTCAGTTACTTGACCGTATCACAAACGGTTTTGATAACACAATTTATATGACAGAAATCAATGAATTTTACTCTATATAACACAGGGTTTGACTGCTATACACATTTGTATGACATACATCAAGCCGTGAGTCGTCCAATCGTTTAACAATTTAAAATTAAGACGATCAAACGGCTCACGGCTTGATGTATG
731	30176	b30176	6	81.011	Fvb6	38168728	AAxAB	1.15	1	40	-	219;C/G	AATTCAGACATTGGAGGTCAGTTGCCGAGAAACTTGGGGATGCTGTGCAATTTGCAGTCTCTTAAACTTTCAATCAACAAATTTACTGGTGAGATAACTGATTTCACTGACAGATTGTCTAGATGCACAAACAGCAGCTTAGAGATGTTGAATTTAGGTTATAACAGTCTCACAGGAAATTTGCCTAATTCATTAGGCCTTCTTAAGAACCTGAGGTACCTCGTGTTGTGGTACAACTCG
732	9842	b9842	6	81.104	Fvb6	38607442	AAxAB	7	1	33	**	177;C/G	AATTCAACCAATCCCTCAAGACCATAGTCTGATACAGCAGAAACGTACTCACATTTTAGTGATGTGTGAATGTGAGAGGGAAGGAAAAGGAGAAACACCAACTCAAAATTTCAAATACAATTCAAAATGAAAGCAAGGACCTTTGTTAGTGAGGCCAATTAAAAGAGACAAGTATTCCTCAAGCCCTCGGCGAAGTTCTGGTATAGCAGATCCATCTGCAATACAAACAACAACAAGTCC
733	8209	b8209	6	81.151	Fvb6	38499401	AAxAB	0.12	1	7	-	227;T/G	AATTCTGATTGTCTGCCAAAAATCTTCAGAATATGTCATACCATTTGACAGTTGAACCAATGCTTGCCTGGATGAAAGGTTCTACGCTATGCTGCAGAATGGCTCATATTTTTGGTACCAAAGCTGGCAATTTTGTTGGTGAAGTTCAAAAGAAAAGTACATAAATTTTATCAGTTTGGGCTGGTGCCATGGGAAAAGATCAAAGATGTGATAAATTTGCAACGTGATAATTACTGGTTT
734	38822	b38822	6	81.216	Fvb6	38046994	AAxAB	10.51	1	35	***	28;C/G	AATTCGACCATGCTCTTCATTGGGAGATCTTACTTCAGCAGTCACAAGTGCAGTTACTACTACTGCGGACGTCGCTGTTGACACTGCGGCCGCTGTCGTAGACACTGCGGCCGCGGTTGTTGATACCACAACCACAACCACGACCGAAACTGCAGAAGTAACCAGGGCTGATTTTCCTGCTGATTTCAAGTTTGGTTGCGCCACTTCTGCTTTCCAGGTCTGAGATATAACCATGCTCTA
735	9288	b9288	6	81.304	Fvb6	38052170	AAxAB	9.57	1	51	***	10;C/T	AATTCGACCATGCTCTGCATTGGGAGATCTTACTTCTTCACTCACAAGTGCAGTTACTACTACTGTGGCCGTCGCTGCTGACACCGCGGCCGCGGTTGTCGATACCACAACGACCACCACGACCGAAACTGCAGAAGTAACCAGGGCTGATTTCCCAGATGATTTCAAGTTTGGTTGCGCCACTTCTGCTTTCCAGGTTTGAGATATAACCATGCTCTAGTTTTTAGTTTTACCAACAAA
736	5563	a5563	6	0	Fvb6	4164253	AAxAB	7.04	1	49	**	222;T/G	AATTCTTTTGAGCAAGAGAGGCAATGACATCTCCTAAAGCTGACAGAGATTTGTTAATATGTTGTGCCTCCTTTAATCTATCACCAGTCACCTCGGATTTATCAACTCTTTCACTTCCTGCTAAATCAACTAGATGCATGCAACCGCGGAGAATGCTTCCAGATGTCAGGTCCCTTCCGTGAACATGAACAGTCAAGCAACTGTTTATCATAACAGAAGAGATTTAATGTCTGTTGCTTT
737	27628	a27628	6	5.776	NA	NA	AAxAB	1.38	1	3	-	122;T/A_136;T/A	AATTCCACTGATTCCTTCACCATCATTTCAATTCGTGCAAAGCTGAATTGTGTCCTAATGTCAATCATGATGGAAGCAGATTCCATGGTATCTATTGCATTTACTTCCACATGTAAGATGCCTTTGGCATCAACTCTCATTGTCACCAATGCTTTGGGAGGTTCCCTACAAAATTCAAGGAGATTTTAACTTGTTAACTTAGTAATAGAGCAGTTGCTCACACTTCGGTATCTCATTACC
738	12483	a12483	6	6.415	Fvb6	28304212	AAxAB	1.83	1	5	-	222;C/A	AATTCGACGAACAACAACGTTCTGCACTTCCATCATACATAGTCCATTACATCGTACATTCCCTAAAAATCAGAGCTGAATGAAAAGCAGTAAATCGCAAAAGCTCAGGAATTATCATCTCTTTAGGGATGAATGATTAGATTAAAAGGCATTTTGCACAGTAGTAGGTAGGACTCTAAATGCAAAAGAAGAGTAGGGTTAACTCTCAGTGCAAGACAAAAGCAGTTTTCAGTGTGAGGT
739	20245	a20245	6	8.352	Fvb6	4133962	AAxAB	4.55	1	57	*	106;A/T_174;C/T	AATTCATATCAGTAACATATGAACTTGTTAGGCAACAGCTTCCACTTTGCACACAACTACAAGATTGGTTCACTAGACAGAGAGGAACTCAAAGAAAGTTGGCTCGATCAATCAGAGACTCATTTACAGACGAAAAAGGGACAGTTTAATACTGAAGACAGCTGCTGTACGCCACTTTTCTTATGCTTATAATTTGGAAAACACAAATTCTATATGACCTGAAAATCCCTGAATATACCA
740	36902	c36902	6	9.648	Fvb6	29638774	AAxAB	0.35	1	4	-	23;A/T_48;A/G_108;T/A_139;T/C	AATTCCGCGCCAAGATGCAATGCAGTAGGTTCCCTAGCAAATACATCCAAAACAACAAACCACAATGAACAACAGTATGCAACCAACATCAGCATCCCCAGAAAACAGTCAGACTTGATACCTTAAACCAATTCTAATCTGTTCCCAACCGAGTCTTTTTCTTAAGCAGACGCCAACCACATACATGCATTAAGTTTAACAAAAAGTCAATTTCTCATTTCCTTCCCCTATACTAATCTA
741	21345	a21345	6	10.258	Fvb4	13323489	AAxAB	2.57	1	19	-	85;G/T_150;A/G_155;T/C_216;A/G	AATTCTTCAGTTCGGTTCTTTAAAATAAACGATTAAGCTTGTATGTTTGTTTACAATGCATGTAAAGTGGTTATATTGTTCAATTGTTGTCTCGTAATTAGTCACTGGAGATTAGAAATTGAGTTACTAGAGGTCAGTAACTGATTATTGAGGCTTAATAACCAAGATTATTGGGGGTCAGTTACTGATTATTGAGGGTCAGTAACCTAGACTATTAGGGGTCAATAACTGATTATTGGG
742	11869	a11869	6	12.684	Fvb7	11336699	AAxAB	15.38	1	41	***	90;G/A	AATTCACTGTAGGTGCAGCCATTTTCCACTTGACCACATAAAATTGATGACCATTTCTTATTTTTAAACGGTCAATGGAATGAAACTCATGCTGCCCATACAACAAACTGTTTAAAGGATTTTTAGCCATTTCCCTCAAATAAATGGTAGACAACATAAGAAGCATCCTCTAGCGAATATAAGATAGTTCCCACAACTGATGAAAAGCTAAGAAATCAACCAATGCTTCAGTTTTTGGAC
743	39592	c39592	6	13.698	Fvb6	30606676	AAxAB	0.03	1	3	-	33;A/C	AATTCATATTCATAGTCACAAATTAATACTTATATCGTGTTTCCTTGCATATTTGGAATGCGACAACATATAACATCTTACTATTTCATAAGATCCGAAAAATGACTTCTCTAAAATGTTGTGTTTCCTTACATATTTGAAATTGACAATATATAACACTTCGCTACTCTTTTGTAAGATCGGAAGAATAACTACTCTAAACACATTTAAAATGGGGTTCTGCAAAACAATTTAATTATC
744	37346	a37346	6	13.829	Fvb6	5592551	AAxAB	0.18	1	4	-	231;C/T	AATTCGAAAGCCCAAAAGCTCGGATCTTTAAAGCCCAGAAGCTCCGATCATGCGGGTCTCAAGTTTCAGATAAAGCTGCGATCTTTCAGAAATGAGTTACAGGTAACAAAAATAGAGGGACAAGACCTCTTCAACTTCACTGAGTCAGTCGTTGGGGAAAAGATTGAAGTTAGAGAGAGACGTTTGTGTCTCCCCTACTCGATTTGAATTGTGTTGTTTCCTAACGCGCATCGGATCCAA
745	6329	a6329	6	14.047	Fvb6	6357620	AAxAB	0.25	1	1	-	15;A/C_88;T/A	AATTCCTTTTCTTCAAAAATTTGAAGCCTTTCCACCCGTTCCTTTTCCTTACAATCATACGTGGACTGCATTAACACTCTTGGCTTGTTTGTTTCAAGGACTTGCCCTATTTCTTTCTCTTAGAAGTTAGAACAAACAAGATTGAACAAACTCTGTCCCAACTCAAGTTTCATCTTCCCTAACGATAACAAGGGTGTAGCTTCTTAAAGACGTTGATTTCTACATCTCCCACTACTACCA
746	37151	a37151	6	0	Fvb6	15125028	AAxAB	4.91	1	79	*	95;T/A	AATTCCATTTTACTATGAACAGTTGAACACTAACGTTGTGGTCTTTTTCAGTTTTCTGGTTCAGTTTTATAAAGTTTGTCCTTTAAAAAAGCTCTTTATGTTTCAATTCTTTGAAGCCAAGTTGGGATTTGGGATTTTTCATTTTTAAATGTTGATTTAGAGTTTCTGTGGTTATTGTGTGCTGTAGGTGTCTGCAATCATAGATGGCTGCAGTACTGGCTACAAATAGATGCTATGGGC
747	38597	a38597	6	1.789	Fvb6	6357623	AAxAB	0.36	1	10	-	138;C/A	AATTCTGTGAAGAAGAGGATGTTTGTGGATTTAGAAAGGGGTAACAGTAACGAAAATTGCATGATGGATTGAAAGTGCATGATTCTTGAGGCATTAGGTGAATGTAAATTGACAATGGAAGCTATAATAGAATCACTTCGTTCAGTAAAATGACATAACCAATCTGAGTTTTTTTTTTCTAATTTGATTTCCACTAAAGAGGTGGAGTGAGTCCTCTACTTCTGTGATGATGAAGAACTG
748	15888	c15888	6	4.73	Fvb6	15102989	AAxAB	0.98	1	22	-	36;A/G	AATTCAAATCTCCCACCAGAAAATTCAACCTCTCTCAATCTAGTAATCACATAAGCAAAACCCCAACGCACAAACTCAAACCAACCACAACCAAATTCCCTCCCTTCATCAATCCACTCACTCCATTGTTATCCGCCGTCGCATCCGCCGAATCATCCTCTGACGGCGCATCAGCATCGTCCCCTGACGGCGCGTCAGCATCATCCTCCGATGGCGCGGCAGCCTTCTTAGGACTCGGAG
749	30609	a30609	6	7.187	Fvb6	7527545	ABxAB	2.62	2	34	-	140;C/G_152;A/G	AATTCAACAGCATTAATGCAATGCTACATAATACAGATAGAATCAACTGTCAAAACTGTTTCTTTCAATTCCTGAGTTGTTCTCAAATATTGATACGAGAAAAGGAATTATATTGGAGCTAATCTCAGTGTTCCTTAAAACATAAAACACCCAATTTCAAGATCCGAAAATGCCAACCAAGTCATTCCGAAAACCCAAAAGAGAAACAACTCCAAAGATGCATACTTCAGATAACAACTG
750	28795	a28795	6	9.069	Fvb6	7297862	ABxAB	8.06	2	49	*	112;A/G_210;A/T	AATTCGCCACTCTTCTTATGTTCTCTTACTCTCCTTACTTTCCACTGCTTCGTTCTCCGTTTCTATTAAGCCTTAATCCTTACCTTAACCTTCCTAAAATAAGATTTGTCCTATATGATCGAGTCAAAATATGAAGAGTTTTTGGGTAATACCTATTTTCGGTCTCACTTTAGTTGTGGGTTCAAGATGAGATTCAACACCATAACAAACAAAAGCACATGCATGCCTACTCTGCCCACA
751	14766	a14766	6	10.931	Fvb6	7472892	AAxAB	0.75	1	11	-	71;G/A	AATTCGATGAACATTTACAATGCTGGTGGAAACCCCCAAATTAATAAAGCTAACGATGCCGTGGTGCCGAAGCAGATGCTTATGGATCCTCAGCCTTGGATGATTAGTGGGTCTTCGTTTTCTAAAGGTTGATTTGATTGATTTGAGAATTTTTGAGCTAAAATGTGTGCTTTGAACTTGTAGATGCTTTGTTTTGTTTGCATAAATAACCTATTTGAACCCTGTTCATCAGTTAGTAGA
752	28863	a28863	6	10.943	Fvb6	7585971	ABxAB	2.39	2	4	-	57;T/C	AATTCCCTCACCAGTAAAAATTGTTATTAATGTTTCTTTAACCCTCACCTAAATTCATAAGATGCTCTCCTACTATAAGAAGTACATTCATCATACCAGCTGAGCTGAGAGATCAAACATTCAAACTCCATCCAGATATTCCAGATCAAAAGAATCGAAAATGGCGTTTTTCAGGAGATTGGCAAAGCTGTTCTGCTACTTCATCTACTTCAGCTCCTTTATCACTGTGGCCAACACTCC
753	40676	a40676	6	14.657	Fvb6	33574116	AAxAB	0.25	1	1	-	22;T/G	AATTCAAGAGCCCAGAAGCAGATTTCAAGTGGGTCTAGGGTTTATGTAGGGTTTAAGCTTCAGTGTCATTCGAAAGCTTTGGTCTTGCCCACTAAGGTTTCTTTAGTTAATGGGAAGAAGAAGAGGTATGGAGGCGTGTTGCCTTCGATTTTGAGGTCTTTGGAGAATGAAAACGATGTTGAAAAGACACTTGAGTCGTTTGGTGAGAGTCTGAGTGCGAAAGAGCAGACTGTGATTCTT
754	33111	a33111	6	23.964	Fvb6	35647409	AAxAB	0.06	1	0	-	167;C/A	AATTCAGCTGCAGGCATGTATGGTTCTTGGAAAGTAATTTGTACCAACCAGTCTTCAGTATTTTCCATTCCATCAATTTTTGAGGAAGGAAATGAGGCAAATCTCTCGTTTGGAATCTTAAAACAAAATTTCTATGAACCACAAAATCACTGATACAACTCAGAGAACATGATTTGGAAGATAAACAATAACAAATATTGAGTACATTAACATGCATGCTACATCGATACTATAAACTAA
755	12571	a12571	6	25.443	Fvb6	35897844	AAxAB	0.04	1	43	-	44;C/A	AATTCAGTGATAGAGGTAAGGAAGGGTGTAACCCAGCAACGATGCTTCAGGCATCTTTAACCGACTATAGTACTCTTGGATTAGTCGTCGATTATCACCTGTACTGCCTGTAGCTTGACATAGTTATGTAAGGAGTGTATGAAGAGGTGAACTACCCGATAGTAAAATGATTCTGTAATTCCATGTTATAGCTACTCTTTCGCGTTCATGAGGTTTCAACGTGGTTAACCTGCTAGCCCG
756	29314	a29314	6	26.933	Fvb6	36187529	AAxAB	12.81	1	60	***	91;C/A_99;T/A_145;T/C	AATTCACAGACGCACTATGCTCATTGAAAACATGAGCCTGGTACCACTCATTTGGATTACCCTCCTTCCAAATTATCACTTGGCCATCATACGAGCACGTAGCAAGGATCGGCCCAAACTTGGGATGCGCCCAACCCACCTGCCATACAGGACCCCTGTGACCTGACAACGTAGCAAGGTGCTGTGAACTCGCATTGCTTCCGATACCAATTATCTTAATAGTGGTATCTGATGAAGCCG
757	11530	a11530	6	30.949	Fvb6	36566189	AAxAB	1.31	1	16	-	193;A/G	AATTCTCCATCTGCAATCAACATGCTATTTGATGAGTGTCGACAAAAAAATAAGGGTTAATGTGAATACAATCACATCTCAGTAAATCAAATGATGTATCATTCGCCCTCTTCAATGAAGTAACATTTTCAAAACAAAACAAAAAAAACAATCAAATGTTGATAATTTGCCAGATGTGATAAAGAAATATGAAATATGTACCTCTTCTCAAAATAAAAAATAAAAAATATGAAATATGTA
758	39614	a39614	6	33.156	Fvb6	38011235	AAxAB	0.17	1	49	-	119;G/A_192;T/C	AATTCGCTAGTTGTGACACTGAAGAGAGTGTTGGGGAACGAAACTATTGGTGAGGTGCTTACTATTTCTTGCTTTTGCTCCTGTAATGTTCTATGACTGTTAATGTTATTGAGCATGTAGGACTAGTCCAGTAATTTGTATTTGGTGCTTGATTCTTTGTGTAGCGGAATTGTTAACTACGAACAAGTTATCTGAATTGGCATGCTTGGCACTCTATTTGATGTATGAGAAGAAACAAGG
759	267	a267	6	34.107	Fvb6	37946313	AAxAB	1.47	1	30	-	236;T/C	AATTCTTGATTACTTCCAAAACTGCTTACATCTATGATTTTTGTAACAATTTTTATCATTGTGCAGATATCTATATTCAAGAAGGCAAACTTGATATTTCTATTCTTTCTTTTGAGGAAGCTGATTCTTCCCTTTTACTCATTCACATTGTTCTGTATCATACTTCCATTGACCATGTTCATACCTGAGGCTGAATTACCTCTTTGGGTAATTTGCTATGTACCTATTTTTATGTCTTTC
760	12602	a12602	6	34.729	Fvb6	38198436	AAxAB	0.25	1	1	-	43;C/T	AATTCAAATGTGCTTCAAGATTGATCTTCTAGTACGTGATGCACTAAGAACGAAAACGAATTGGTTATCTGTGAAACATATATATACATATGTCCTTCGGGAAAGACTTGAAAATGCCTTTTTTATGATTGTTGGTGTTGGTGAAGGATGGTATTCTTATTAACTTGTGCGCGCATGTTATCAAGAGGGGTTCAAATTAGTACTACATTGGCATTTTCTCTAATTATAATCTTGGATTTG
761	20082	a20082	6	35.891	Fvb6	38288277	AAxAB	0.01	1	8	-	215;T/A	AATTCATCTCATGCCCTGCAGAAATGCACAAACGAGGCAACTTTCACATCCTTTGCCAGTGCTACGAGCTCGTGAGATTGATGAATGGTCAAGAAGCCAAGAATACAGAACTCTTCTTAATCGAGCAACAAGGATCACTGCTGGATCAAAAGTTTTAACAACACCTGGAAGATACAGCAACATCCAAAGCAGTGTGAGAAGGTAGCTACTTGGTCTAATTCCTAGAATGTGGAAACATCC
762	7855	a7855	6	36.837	Fvb6	38305762	AAxAB	0.01	1	6	-	33;G/A_222;A/T	AATTCAGTATGAAGAACAACAATTACATTCCTTGATGAAGTTACCCACCCTTGTATGCACCTTTAATGGAGTCAATGGAGGTCAAATTCATTATGCCAAGCAGCCAAGTTCAAGGCCTTTAGTTTCAATCCGAGACCAGCACTTCACATATGCTCATGGATAGAAATCTCAGATGCAAGCCATGTTTGAGAGCAAAGACATCATGCCCAGTACACATTTATAAGGTAGATTCTCTCCCAT
763	37316	a37316	6	0	Fvb6	18090478	AAxAB	0.74	1	59	-	133;T/C	AATTCAAAACAAATGGAGCACCACAAAAAAAATGTGAGAATGATTCCATTTTTATTACATAGTGCAGCATCGAGGGCTTCTCTGGAAAACATGTGACACCGCATTCCCAATGTCCCTCCAAGATATTGAGCTGTTGCCATTACCACTTGGTTTCCTGAAGTCACTAAGAATACAGTTGATGAAACCCGAAGCTGTAATCCCTTCCTTGTTATGTGCCCTTACAGAGGTCATCAAGGTGCT
764	5155	b5155	6	2.777	Fvb6	11457218	AAxAB	0.7	1	3	-	121;C/T	AATTCTAATTTATTTATTTTGGACGGTCATACCGTACACTTACAAGTTTTATTATCTTCGGCAATGCAGATTGGAGGCAGTAATCTCTTCAATAATGCAGCTGCTTTACATACCTTAGCTTTCACATGTGTATGGTTAGTGTTTGTAGGAATGATGGCATTCCAAATAATGCATGCATTACAGATATCTGTTCCCTTGAATTTGGTGGAACAGGGAACACTTAAAGAAGCTTTAGATATA
765	16091	b16091	6	2.891	Fvb6	12287787	AAxAB	0.03	1	21	-	19;C/A_22;A/G_71;T/C	AATTCCTTGGATGCAATAGCCGAACCCTAATTATCCATCACCCTACATCATCATGGCAAAACACTATCCTATGTGATCCGTTAAGTTATTATGGATCATGAATACAGTGAATAGAATCCTAGTTGACATTTTATTTGATAAATACATCCCTTCAAGAAATCAGGTTTTATGCACGTATCAACTCTAGAATTACTATCCGAATATATAGTAGATATATCAAACAAACTATAATCGATGTAA
766	19462	d19462	6	3.635	Fvb6	12749274	ABxAC	1.38	3	44	-	95;T/C_186;C/A	AATTCTTAGGTTGCTTCTTCCTGGTACTAGCTGTCACCTGATTCAAACAAAAGGCTTCAGGGCACTAGCGGCAGAAAATACTCAATGCTGTTACATATATAAGCCCTTTCAACTACGAGGACTAAAAATAGATAATAAAAAAGCAGTGGCAAGCATACATAAGGAAATATATAATATTAGAAAGTTCAAGACATATAAAGGAAGACAAAGAGAGATGGTGGGAGAAAGAAAAACACCTTC
767	6706	c6706	6	4.046	Fvb6	18583573	ABxAB	2	2	43	-	104;C/T	AATTCATAGAAAGATATTCAAAGCCCAAAGCTCCTCTTCACCCTATTGGCATAATTAGCATCATTCAGTCTATTTACGTTATGGGTTTTCACTTCGAGTCTCCTCTTCATTTCCACAGTTCTCCTTCCATGTGTCGTTTGTGCCGCTTATATTTATCTCTAAATCATTGTGATTACACATTAGCGTAGACAACTACTCCATCTTTCCAAACTTGCACTCTGCAGTCACAACTCATAATCT
768	30622	b30622	6	4.461	Fvb6	21591310	ABxAC	1.48	3	8	-	140;C/G	AATTCTAGTTGTTGGTGACTTAATCACATCAATGAGGGAACCACTTATGGCTTCTTTGTCGTTGGAGCTCACGCAAGTTTCATGGTGGTGATCTGTATCGTTTGCATCTTCGTCTAGGGATAGCACAACTCCACTGGGGAGGTGGTTTCCATTTGACTTGGCAATAGCACGCATGAGTTTTGTGGCCTCGTTTACTTTGCCTCGTACAAGGTACCACCTCGGAGACTCTGAGAGGAAGGG
769	1711	d1711	6	5.632	Fvb6	22312249	AAxAB	3.65	1	46	-	187;T/G_209;T/G_214;T/C	AATTCCATACACAAACCTGAAGGGGAGGAATCATAACCAAAATGTATGTTAGTTGTCTCACCAACCATACCTGATTAGAGATAAATAATTTTATCATGGTAATTACATATTTCACAATTTAGTGAATATACTATTCAATATGGAGGCACTGGGAATGCTGTGAACAAGTGTGAATAGGTAGTTAAATTCATGTAGAATGGGAAACTAGATCCCATTTGACCTATAACAACTGTATATAGA
770	41504	b41504	6	8.13	Fvb6	28037807	AAxAB	6.87	1	68	**	210;C/T	AATTCTCACTTTTCTGTCTTTGAACAGGGACCTGATTGTTATCATACCTCACGTCCCAAACTGTGTGATATCAAAACTGCATATGACTTACCAAAGAACAACAAGATGCTAAAAATATTTGGACGATGGGCCGTGGAAATGTATAACAAGGAAAAGGTTTGAACTGAAAACTTCATGAATTTGTAAAAGCAACATGCTATTGATTCTACCCCATGATGCTGATTTATAAAAATATTGATT
771	40637	c40637	6	12.225	Fvb6	31487043	ABxAB	1.63	2	40	-	150;A/G	AATTCATGAAAAGGGTCGAGTCAAAGATGATAATATATGACCTAACTGAAAATGCTCTTGGCCTCTGGCTAATGTGATGGATGTTTCTGGGTACATCTAGGATTGTCAACTCTAGCTCAGGCACTTTCTGAGTTTAGTTTGATCGAGTCTATGTGATTCATATATGCTACTGTTACGTACAATGGCCTTCTTCGGGAAAATTATATTATGTTACTATACATACATGTATGTATGTCTTAT
772	25878	d25878	6	12.601	NA	NA	ABxAC	1.15	3	38	-	69;A/G_223;C/T	AATTCCTGTCACACTCTTTTTTACTGTTGCTGCATGCAGCTTCATGGGATATGCACAATATCCCAATTTAATTGAAAAAGGATTAGCGCCACTCAAAGGTGAGAATAGCTTTAGGGTTGTAGTTTGTTATCTTGTTAATAAATGGCTTTAATTTTATGGTTTTTACTTCAGGCCAGTTTGTTATTTGCACTCCTTCATCTGTTGTTTTAAAATCACATAATCGCAATTCGCGACATATGT
773	20557	a20557	6	13.318	Fvb6	30956770	ABxAB	22.8	2	35	***	120;A/C	AATTCCCTTAGATGGAGCTTACTAAAACCCTTTCTTAAGAGTTGACTTATTATGTGATCGATCATTAGTAGTTCACTTAGATGGAGATGATGATGAGTACCTTCATGTCTTCCACGAAGGAAGGAAACCCACCAATGGCCATGAAGGTTAGAAATGAAACCACAAATGCTAGTAGAGAGCCTCGTGCCTGAAACAATTTAATGTACGTATATCAAACAAGTTCTTGACTACGTACAGATC
774	8245	d8245	6	14.117	Fvb6	32755847	AAxAB	10.37	1	40	***	8;T/A_36;A/T_164;A/C_200;G/T	AATTCCAAAGGCGTTGTGATTCTTCTTCCACATATCAATCATTTCTCCCGCTGTAGGAACCTGAAAAACTAATGTCAGTTCACATATGCAACCGCAACACTCATCAACGTGTCCAAACAATAACCGATCACTTTCAAAATCTATTCCGACCGAATTTGAACAAAATATGAACCTGAAGAAAAGTACAGACCTTCAAGTTCTGAGGACCAAGTACAGCTACTCTGCTGGAGCATAACTCCA
775	18721	d18721	6	14.512	Fvb6	32006515	AAxAB	2.89	1	33	-	45;A/G_105;A/T_192;A/G	AATTCCATCTGGAAAGTCCAGTAACAATTCGACGGCTCAGAAGCTGCCTGTTTTACTGCAACATGGGCTTATGGGGGTTTGTATATATCCCTTGTATATTATGTTAGAACTATAGGTTTAATTGAGAGTTTGCATTACAACATGTTACATCTAAATGTCACACATTGACTGATGATGAGAAACGTTGTGGATGTATGTAACAGGATGCTGGATCATGGCTGCTCAATCCGCCAAATCAAG
776	37570	b37570	6	15.342	Fvb6	32550979	AAxAB	0.01	1	14	-	159;C/T	AATTCTTATTTTTACTGGTTTCACGTACTATTTGTCCCTCTTCCCAAAGTTAATTACTTAATTTGTTCTCTATTTTCGCATCTTCAAAACTAATCAGGGGAGCTGGTTTTGCTGCCGTAATGATGATGAGCCTGGGGTTGTTCAAGATTGATGATCTTCCTGGTCAAGTAGTGATTGAGATCCTATGTCGACTTCCTGTCCGCTCGGCTTTTCAATGCAAGTGCTGTGTCCGCATGCCCC
777	32265	b32265	6	15.674	Fvb6	29448070	ABxAC	5.59	3	10	-	14;T/C_37;A/C	AATTCGATACAGTCCGAGTGTATGAAAACTTGTAGTTCGAGTAGTAGGAAACATGCATGTAAACTCGTATTCAAGTTTAGATTCTGAATCCCTCCAAAACCTTTTGGTCTATAGTTGTAACTTCAAAAAGACATTAGTGTAATAAAAGTAGAGTGTTGTTATTAACACGTCATTTTTGTCTAACATGTCAGCCACAACTCACAACACACAGGCTGCATTATTAGGTAAGTTATGTGAAAC
778	21468	b21468	6	16.504	Fvb6	29486614	ABxAC	3.53	3	6	-	136;C/T_154;G/A_234;G/C	AATTCACGATTCAATAAACAACAACATCAAACGCTACTAGAACCTTCCTCATAATTACAATGAAAATTACAAAAATTTGTACAAAGAATAGAAGAGCAACTCAAAAATGTCTCCAAACCACAAAAACGCTAGGGCTCATAATGTAATCCCAAAAGTGTCCCTATCCCTCTCCAGAAGCTTCCCAACCAGAAACCCTACTAAAACCCCAGCCTTTTCTTCCTCTGTCACAGTTGTGATCCT
779	21772	c21772	6	17.04	Fvb6	30949838	AAxAB	0.68	1	51	-	225;C/A	AATTCGGATACACAGGCAGTAAACGAATCTGGGTTTTCTATCCCACACTCCACTTGTCCCTTATCATACTCTATCCCTAACGTGTAGTTTGGTATGGAGCTTCTGTGTGGTCTCTGTTCCCTACAAAATCCCTGACCTTATTTCTGGGTTATTTGAATTGGTCTCTGGGGAATCCAAAGCCCTAAATATAAATACACATAGCGACGGTGGTCGTTGACAATCGGCCCTAATAATACAAAA
780	38048	a38048	6	22.713	Fvb6	34734086	AAxAB	1.52	1	79	-	95;A/G	AATTCCTGCATTCCATCCTTGAATTGATTCTTCAATGCCAGCATGTGTCAGTGTAAAGAGAAATGATCATAGACAGGAGCGGTAAGTGGTATATGAGGAATGCCAATGTCGATCAAAAGAGAGGAAGAGCATTCGGTTGGGGAAGTGATTGACCAATTGATAATCACAGTTGGAGACATTGCACGTCCTCTGGTAGATTCTTTGGCAGTGGCTGTCCAGTGACATATCGTTGGGGACATG
781	683	a683	6	23.642	Fvb6	35171314	AAxAB	4.05	1	36	*	93;T/A_99;A/T	AATTCTCTGAGTATGCTTTGCATTTTTATTGTACATAGACTGGAGGAGAAATCAAGAACTAATAAAAGATAAAATAAAGCTTGACTTGGAGATTAAGTTATAGGGACTGATTGAACTCGCAACTCCCATGTGGAGTAAATCATTGATTAAGAAATGAAAAGGTTTCTAAGAGCTAGTCATAAGATTGGTATCCTTGGCATACATTAGTGGTGTATGAAAACTGGTTTTCTGTTATATTGC
782	22251	b22251	6	24.585	Fvb6	38097846	AAxAB	8.03	1	1	***	144;T/G	AATTCTCAAACACCCAGACACCAAACAAGTAACTTGCATAAGAACCAAGCTAAAAACCCAAATAAACCACGTAAAGGAACCATCTTTACCAATTCTGCTACCAAAACAGAGACCAACAAGTACTGAAATTGCTATAGAGATGCAGATAAGTTAAAGGTAGGAGACAAACCTATAGAAAGTAGAGCTACACAAAAACCCATAAAGAAGAATAAGCAGTGGGGGTGGTATTGTTCTTCGTCT
783	6845	b6845	6	24.877	Fvb6	36592942	AAxAB	3.31	1	36	-	83;T/C_118;C/A_163;C/G_205;G/A	AATTCAAGTGTCTGGGAGTTGCGTAGAACTTTGACTAGAGCATTATCGCCAATGTACTTTTGGGAGACAAGGTAACTGAAACCTATGCGCTCTCCATGCCTGAATGGAACTAGAAAATCGATACCAATAATACTGTTAACATTGAAACTCAGAAAGCTTATGACACTTTAGATGATGAATATAGAGCATCTCCCAGATAAAACACGGGAGTCCAAAGGTGACTTGAAAAGAGAACACAAA
784	43725	a43725	6	28.45	Fvb6	38499401	AAxAB	1.51	1	15	-	7;T/A_34;G/A_154;C/T	AATTCTGTTTGTCTGCCAAAAATCTTTAGAATATGTCATACCATTTGTCGGTTGAACCAATGCTTGCCTGGATGAAAGGTTCTACGCTATGCTGCAGAATGGCTCATATTTTTGGTACCAAAGCTGGCAATTTTGTTGAAGTTCAAAAGAAAAGCACATAAATTTTATCGGTTTGGGCTGGTGCCATGGGGAAAGATCAAAGATGTGATAAATTTGCAACGTGAGAATTACTTGTTTCAT
785	37152	b37152	6	42.934	Fvb6	15125028	AAxAB	7.36	1	46	**	85;G/A	AATTCCATTTTACTATGAACAGTTGAACACTAACGTTGTGGTCTTTTTCAGTTTTCTGGTTCAGTTTTATAAAGTTTGTCCTTTAAAAAAGCTCTATATGTTTCTATTCTTTGAAGCCAAGTTGGGATTTTGGATTTTTCATTTTTAAATGTTGATTTAGAGTTTCTGTGGTCATTGTGTGCTGTAGGTGTCTGCAATCATAGATGGCTGCAGTACTGGCTACAAATAGATGCTATGGGC
786	5993	c5993	7	0	Fvb4	2154607	ABxAB	6.82	2	12	*	145;T/C	AATTCTTTTGTATATACCTTCTCATGAATGCGGACTGAAATGCATCTTAAAGAAATTTATGAGTCTATCTAGTGGACTGTATGTCACTACGATTCGAATATCGAATCTCATGTTGTCACCAAACATGATATTTGAGACACCGACTTATATAGGCCTTGGTTTGACCAAATTGGTTAACCTGGAAGAGATATAATGGTCCAAATTTTGAGAAATTCTCATGGACATCCATTATTCCGCTCA
787	30562	d30562	7	0.859	Fvb7	3351962	ABxAC	19.47	3	47	***	7;T/A_126;C/T_173;A/T	AATTCACTAAGAATTGCATTACCACATCCATATCTTATAAATGATGCATTTAGCCGATTTCAGATAGGCAAAGTCGGTTTGGGAACATATGGTGCCGAGGAATTGGCCTATTCTATAATACCTCAACTCCTCAGCATAGATATTTTTGGCAAGAGCAGCTTAAAATCATTCCTAGCAATACTACTACTAAAAAGAAGCAAGATACCACACATTATGACCTCAGAACCATTAGGGCAGCAG
788	18552	c18552	7	2.271	Fvb7	3188017	AAxAB	5.33	1	37	*	12;T/G	AATTCCTTATGTTCTTTGATGAATTAGGAACAGAAGATTGGACTATGTTTCCAGCGAGCCCAGAGCTTGATGGTGGCCATTTCTGGAAGCTCTCTTCCTCCTAAACACATTCCTTACAGTTGGAAGGCGGATTGAGGTTCCTACTTGCAGGCGGTGATTGTGGACGATTCTGGCCAATTCCGACTGAATTGGTTTGACTCCCAGGTATGAAAAATACTCCTTTTGCTTCAATCTCCATGT
789	18665	d18665	7	2.939	Fvb7	2558408	AAxAB	4.85	1	36	*	43;G/A_44;A/C_234;T/G	AATTCTGATGATCACGCAAATTTCTTGAAGAAGAAAGGCAAAAACCCTGCTCATTATAGGCCTGATATCCTTCATCAGGTTAGCTGATTCGGGCTTTTGTTGCTTTAGCATTTTATATATTCTAAAAATGCTTATATCTATTGTTAGTTAATGAGCAAAAAATTAGAATGAAGAATATTTATTGGGTGTACTATGAAATATTGAACAAACTAGACTGAAGAAGCTTATAGAACATCTGTC
790	2243	c2243	7	3.063	Fvb7	2344358	AAxAB	0.03	1	5	-	68;C/T	AATTCTTTCAGATTTCATCATGGTTTTTTACACCATAGATAATATAGTAGGTATCAATAATCAATTTTCTTGGTAGGTCAAAACACTGATTGCCTGCTCAAAGAGAGAACATGTACATTAGAATGAGGTAGATGTGTTATTATACCTACAATAACTACTTATATCTTACATGTTAATTAGTCCACTCTTCCTCACCTTATCATCCAAAGGTTCTCCTTTCTTCTTCCTAGTGTTACATAT
791	41108	b41108	7	3.293	Fvb7	1802919	ABxAC	12.42	3	13	**	227;A/C	AATTCACACATAGGATGCCCCATAAAGCCACCTCTTTCACTCTCACTTCCATCAACTTCAGAGTCACCCGTACTTGTATGCTGCTTCAACTGTGCTTTAGTATACAGCTTTTGTTCACAAATAAATACCTGGTTTGAACAAAAGAAGATAAATTAGACCACAAACATAAAACCAAAGGGGACAGGAAGTAGACCACTTGAAACGCAAATGACAGATAAATCCCAAATCTCATACAGAATA
792	27634	c27634	7	3.542	Fvb7	4515671	ABxAB	3.1	2	7	-	36;A/G	AATTCTCACTTTGTGCAGCTGACAAGAGCCTACTTTACGTTTTTAGAGGTCTTGTTCAACAGCCACATAGTTTACATACTGAATCTGGATACCAGTACCTTTATGCATATCGTCGGATCTCTTGAATCTGGCCTCAAAGGTCTAGATACAAGTATCTCATCGCAGGTATGTGTTATGAAATTATGGCAATACATGTCTATTTGAGAAGCCCTTATCTAGTTTTACGTACATGCCTGTAAT
793	42507	b42507	7	4.491	Fvb2	14949234	ABxAB	3.19	2	11	-	21;C/T_35;A/C_187;C/T	AATTCAAGGCCAATTACCACGCCATAGTCATCCATATTGACCACGGTGAAATCAATTTTCCCCTTCCAAGCGCCGATGTGAATCTCCACATCGCGTGCTACCCCAACAATGGGTGTGGCAAGTGTATTCACCGTCTTCACACTACCCGACTCCTTCGTGACTCGGAGGCTAAGCTTCATTGCCACTTCCAACGTCATGAAGTTATGAGTTGCTCCGCAATCCACCAAAGCATGAATCATC
794	2047	b2047	7	5.822	Fvb7	1413873	AAxAB	5.76	1	45	*	8;C/A_92;C/T	AATTCTCTAAAAGCTCAAGTTATACTCATCTCCTTCATCCATTTATACAAATCTGAGACGCATATACAAATATGAGACGCCTAACCTAGAGATACAGATCCAATCAGCTAATCCACACCACTAAGACCACACCACACGAATCTGAAAATTTCAAAGAAAAAAAAACAAACCTTAGGCCTCAAATTGGAGCCAGAATCGAACTTCCAATTCTGGTAGTAAGGAAAGGACGGCGAGGCGCTG
795	4999	a4999	7	6.453	Fvb7	4750485	AAxAB	35.29	1	43	***	172;C/T	AATTCAGGAGTGTAGATGAAGCTAGGCGAGCCAAGGAGGGTTTGGAAGGCAAGCTTTTCAATGATCCTCGGATTACAATTATGTTTTCAACCAGTGATCTGCCACCAGCTGGCCCATACCAACTGGGAGGAGGTAAATGGTTTGCTCCTAGGCCTGATGTGCATCTATATAACGAACATTCTATGAGCAACTTGGGGCCTGGAGCTCTACCACAAAGTCCAAGTGGTAACTTTCTTGGAC
796	13554	a13554	7	6.513	Fvb6	21221740	ABxAB	2.59	2	42	-	156;C/G_193;A/G	AATTCTATAGCTCTTAATGATTCATGTTTAGGTAGAGATGGGTACGTTGATTCGACGCTGAGTATCGATTGCAGCCTTTGCATGAAATGTCCTAGTTCTAGACGTTCTGTGCTGGAGATAAATTAAGTAGAATTAATGGGATCGATGCATGACCTCCTAGGCTTGTGTTTCGAGTTTGTTTTTGATATCACTTAGCAATGAAATCTGTTGTGTGTTTGAGGCATGTTGATACTTGTTTGA
797	3413	b3413	7	6.859	Fvb7	5868260	AAxAB	8.44	1	16	***	187;C/G	AATTCTTGGCTGCTTTCAGGAATTTGTGGACTTTGTCCATCTGAACCCACAAAAGCATGTTTCCAATGCATGTTTGGAAGTGAAAGATTGCACATGTGAAGTCAGAAGTACTACAATTGTCATAATTCCTTGAAATAATGTGAATTTGAGTAGCATAGAGAGCATCCCAGGAGGTTATTCTTGGTTGCTACCACTATAATGCAGGTCTCTATTACCCATTTGGGATCTGAATCATGGTTT
798	43834	c43834	7	7.89	Fvb7	6947002	ABxAB	2.29	2	4	-	33;G/A	AATTCATCAAAAATTAACTTGACTAAAGAATATGTTGTACTAAAAATATAAGCAAGTGGATTTCTGCCAATCATGGATATGCACAGTGACTAGGTTACACGAAAAACTGAAGAAAACAGAAACTATGCTGGAGCTTATCTAGTGATTGTGCATGGAAAAGTTTGTTAATGTAATCAACTGTGATCATGGACAACTAGCTTATTGTAAGCCAAGCTAACAAAGGTTATACACAGTTGTGGC
799	26354	d26354	7	8.32	Fvb7	22338810	AAxAB	6.34	1	3	*	69;G/C_112;A/T_196;G/C	AATTCCTGAAATTAAGACTGGACAACGATATGTCTAACTTAGAGTTGCAACACTTCTATGACATGATTACGTTGTCTACACCATAAGAATAATCAACCTACCCTCTTTTCTCAAATACATTTGGCTTATTTATACATGTTTCACATACATATACGTCTAGACAATAAGAGTATTAAATTCTTAGACAATGTAGTATGACTGTCTATCAGCTCACTTTTATATGTTTTTTCTTTGGAAGGC
800	5105	a5105	7	8.373	Fvb7	6302146	ABxAC	5.08	3	12	-	16;C/T	AATTCAAAGCAAATCTCGTAGGCCACCTTATTGGCCTGACGATAAGCATTGCGGAATATAGGGCCTGGCATCAAACTGTGCCCCTATATAATGTCATCATACATAGATCCTAACATGGATGTATGGGGAATGACTACCTTCTTAGTAGCATTAGCGAGAAGTAAAGAATCAGTCTAAAAAATTATAGGAGACCAACCTTGTATCTGTGCCAATTGATAGCAGCTCTCCCAGCTTATGCAT
801	43485	c43485	7	10.284	Fvb7	9615175	ABxAB	3	2	1	-	166;A/C	AATTCAGTCCTGTAGCATTGGTTTTCTTAATGTTCCCACACAAACCCGAGTCAACCTTAGAGCTTGGCTTCACTTTAGGCTCCATCTTCAGCTTCTTCATCTCCCTCGGAGCCTCAATATCCCCTGGAGGTCCCCTCTTCCTCTTCTTAAGGGCCGAGAGAGAAGAATGTCCATGATAGCTCAAAAGCGTAGTAGTCACTTTCCCATCAAGGCCTGGAAAGGACAATCTGATCTTCAACG
802	38777	d38777	7	14.52	Fvb7	11927626	AAxAB	18.24	1	34	***	72;T/C_104;G/A_210;C/T	AATTCTACATACAGGAGCCTCTTGGTGGTGCACATGCTGATCCTGCATGGACTTCCCAACAAATCAAGAATATAATTGTCGAGTCAATAAAGGTAACTGATATGGACGACTTGAAAGAACAAATTTCCCTCTTAATATCTCTGCCTACTTGTTTTAAAGATTTATATGCTTTTTGACTTAAGATTCATATGCTTTTTATCTGACGCACAACACTCCTGTTATGTTTTCTTAAAAATCAAG
803	1576	a1576	7	16.749	Fvb7	13647584	ABxAC	10.78	3	6	*	127;T/C	AATTCCATTTTGCTTACACAACTCCACTCCTATTCCACACCAGTTACTCCAAAGTCCAAACCACACCGAATCGTGATTGGATTACAATAGCAAGTTCAATTGAATCAATCCAAATCCATCATCCAGATTATCAAAACTACTAACCCGCATACATTTTACTTACACCAACCAAAACATAGTCATAGCACATATACGAATCCAAAAGTAAAGAACATCACCAACACCAAAATCAAACATATA
804	37192	a37192	7	19.238	Fvb7	14163207	AAxAB	0.04	1	43	-	140;G/A	AATTCACACCTAATAGTGAAAAAGAATTTAGCAATGTCGAAAAAATATGACCTCAACTTCCTTACCCGAGTTCAACAGAGGTGGTTTACATTGATTATCTTCTGCTTTCACTAACAAGCAAATCAAGCTTCAAATATACCGACAGAAATGAACGTCTTGTGCCACAATATATGAGTCACAATCAAGCTCCATTGGAATCCTACTCGTCATACGGCTCAATTTCTGTCTAAGACCAGTAGA
805	35937	b35937	7	20.116	Fvb7	12309578	AAxAB	6.22	1	19	*	198;C/T	AATTCAATTCATTTTTCTTTTGTTGGCTCAACTAGGACACAGTTTTCAGGGGAAACTTTTGTACTTATATCTTGAACAAATAAATTATCACAGTAATTTGTTGTCATGAGCTAAATTTTGCTCGGTTATCACAAGCTTGTATGAGATCACAGTTATTTCTACTCGCTTTCAAAGGAATAAGGAATATATGTCATTTATCTTTGCAATTTTGGCTCTCAACAATTACAGCTTGTGAGCTTT
806	9433	b9433	7	21.479	Fvb7	18408480	AAxAB	9.66	1	75	***	151;T/A	AATTCCCAAAGTAAATCAATCCCTCAAATATTATGTTGATGCTATTCAAAACTTTCAGGGAAAGGAAACTTATTCTTAAGTTAATCAGCTTGATAAAAAAAATAATAAAAAAAGATAAAAATTCCTGTTATGCTAGAAAAGGATATTTCCCTTGATGCTCCATCCACCTTCCCCCTTTCACTCTCTAGATACTGTGAGCCCTATTTGTGCAACCAGCTGGAATGTTTTGTATTGCTAAAT
807	20074	d20074	7	26.45	Fvb7	17848410	AAxAB	0.26	1	7	-	145;C/G_146;T/A	AATTCTTCATAAATTTCACTCCAACTTTTCATCCTGTTATACTCAACATCTTTTCTGTTTTTGATAGGACATACATATTCATTCCTCCTAACAGTTCAGAGCTATACACCAAACGGCATCATATTAGACAAATCAATTTAAATTTCTGATCATATACAAAAAGACAACATCAGACTCACAGATCAGGGTTGGCATCAATTTTGCTGAAGAAATCTCCAGTGTGGGGAAACAAAGAACTTA
808	16923	d16923	7	27.43	Fvb7	18397899	ABxAC	0.65	3	54	-	104;T/C_231;T/A	AATTCATTCAACTTTTGAAACTGATTCTTTTACTGATAACTTATATTTTGTTTTCTTATCTGGAAAATGATTCCTGTCGAATTACCATAGGGAGCTGCATATTGTATGTTTATCTAAACAAAGCATTGGATGAAATAATAACTATGGTTGGTGTATCTGTTCAAGCACATTGGTTGTGCTTTGTTAATTAGGAATCTTAAGAGTGTGAAAATACATGGAATGAATGCTACATTTTTTGTT
809	8061	c8061	7	28.458	Fvb7	18365759	ABxAC	14.82	3	47	***	86;C/T_156;A/G	AATTCACTTTTGCTGTTTTCAACCTCTCTTTTGATCGACAAGTGAAAAAGATGATGTGTGCTTGATTTGTCATTTCCAGGATTAGCCAAGTCGATCACGAATATGATTGCTGGAATTACAACAATTCATGTTAATGCATTTAAGGACAAAACGGAAAGAAGGTTAAGTGGGATTTTGTGTTCATAATACTACTTGATTAGAGACAAAGCAACCAAATTAGCCTCAAAGATTCAAACGATT
810	24974	c24974	7	29.153	Fvb7	18809074	ABxAB	1.93	2	11	-	168;A/C	AATTCATTGTCATCGTTTCCAACTGACATGACTCCCCCACTCACCTCAACCACAGCCGTCCGATCTACTTACTACCTCCCCAGACCGCCCTCCCCGACGTCCATTATTTACACCCCACTGCCCCTGACCCTCTTTTTGCGTTTCATGCAAAAAAACAGCAAAACCCGAATTTCAAGGCATCCCTTTCTTTTCAGTCTCGACTTTTAATATATGGATTTCTCCACCACTGTCAATTTCATC
811	20976	c20976	7	30.234	Fvb7	18667600	ABxAB	1.9	2	41	-	120;G/C	AATTCGAAGAAGACGAAGACGCCGCCGACGACGACGACGAGGCACCGCCGTCGAAGGAGCAGGAGCTGCGTTCGGCGAGGGCGAAGACGGAGGGCCTGGTCCAGCGGATGATGAAAGAGCGAGTGGAGATAAGAGTGCACGACGTTTTGATCAAAGGGAACACAAAGACGAAGGAGTATCTGATCGAGGCGGAGCTGGAGGGGATTAAGAAGGCCACGACTATGCAGGAGCTTCTCGAAG
812	1633	c1633	7	31.302	Fvb7	17467380	ABxAB	1.08	2	39	-	19;G/A_208;A/G	AATTCGTAGTGTTGTTTATGCTGCAGTGCCTCTGGCATTCAGGAATGAGCTTGAGGAAGCTGGATGGAAGGTTGGGAGGTCACCTATTTACAATACCGTTACCGCTGCTGATGGCACTGTTAAGGTAAATTTGCATTTCTTTTGTGTATGACTATATTTGATTACTTTTTTCGAGGAGTTTATGTGCCTTATTGATATTGAGTTGAGAATGTTGTGCTTTTTGGTGATTAATTTGATGAT
813	31466	b31466	7	32.696	Fvb7	16235693	AAxAB	1.02	1	47	-	86;A/G	AATTCTGGAAGGAAACATCAGATCCCTGCACAGCAGGTCTGTCGGTGCTGGACTTCACTATAGTAGACCCTGACAGTTGGCTTGCAGCTCTCTGGATACATTCACCAATCTTAAATGATGGTTTTGGTAGAGGTGAAACAGCTTTCCTCCCATCTTGTGTGGCCAAATCAGCACCCTTCTGTCTCTTGGCAGATGATGGTAAAGCCTTCACATTGAACCAATCATTACCATCTTCGGCAC
814	13015	a13015	7	32.937	Fvb7	19947153	AAxAB	0.87	1	52	-	63;C/G_207;G/A	AATTCTAATAGATCAACACCCTTTAATTTATATACGTACGTTAACAAACCATAATCATAGCTACAGGTACGATACACTTACAAATTCCATTTTGAATGAAGGTAAAATAAGAAATCGCTTCTCCTATACCAATTCCCACCATTTCCAAAAATAAGAAGGAAAAAAAGAAACCAAAGAAAGATGAAGAAAAACCCTCGAGGGATTAGGGTCCTATTAACAATCAAGTGTTGGCTTTTGCGG
815	19700	a19700	7	34.117	Fvb7	20077457	ABxAB	1.31	2	2	-	181;T/C	AATTCAGTATCAGATAAACAACAGTTACCATCACAGATTTTCCTCCATGAAATATGTGTTGTTTAATAATGTCTTTGTGCTTGTGGCTAAATGTCAAACAGGGTACATTTCTACCTCTGGTTATTCCTCCAACGATATATCATACAGGCTTGTGGTCAGTCTGGTTGATTGTACTTTGTTCTTTAAAGGTATATGTTAATAAGTATGTAGAACAAGCTCTTTAGTTTCTCATAAAAGAAA
816	18357	b18357	7	36.644	Fvb7	15660377	AAxAB	3.17	1	6	-	77;C/T_148;A/G_220;A/T	AATTCATACTCCAATCTCTGTTTGTGCACAATTCTTGTCTGTCACTACGAATTACTATGGCTTCAACATTGGCCTAGTCTTCATCACCAGCACCTTTTCTAGCAAGCAAAGCATTGGCTTCAGCCAAACCAAATGGTATTACGTGCTCGGCCAGCTTTAGTAACCAAGGGACTCAAATGGAGAAGAGGCCTATTGCTAGAAGGTTGGCTATGGATGTTTCTCCTTTTGGTCTATAAGATC
817	42666	b42666	7	37.416	Fvb7	13156968	AAxAB	18.08	1	52	***	177;T/G	AATTCGAACTCGTATTCGGTATTCTTAATCGGGGGTGCCTTTCTTTTGCAGCCACCAAACTTCCTGTAAAACCCTAATTTGTATGTCTGTTACATAAGGTAGGAATGAAAAATGCTTGTTATCATGTGGGGAAATTTGCAGAAAGATACATAGGCGAAAAACCAAATATTACGTTTTTGTGACTCCTTGTTTAGGCATCCGATTTGGATCTATGATCGGTATACTGCTTGCGACGAGGAG
818	11145	a11145	7	0	Fvb7	3582710	AAxAB	0.37	1	12	-	175;T/C	AATTCAACACCCAAGATACATTTCAAATGAGATAACTCAATCATCGTTTAAATGGACTCATCCAATGACTTGTTTCTATTTTCTGAGCAGCAAGGCATCACATGAAAGTTATTAAACAGATTTAGAACTATTCACACTTGGATGTCGTCAGCCATCCAAGTGATTAGCCTTGTGATTACCCCAAAGTTTATTTTTACAATAGAAACAACTGAACAGAACAATCAACAAATTTCAATATTA
819	10724	a10724	7	2.812	Fvb7	17879850	ABxAC	18	1	47	***	55;A/G	AATTCAGTTGTTCTCGTACCAGATGCCAAGTTGTGGATAATGAGATCCCCATTAAAGCTGATGGAAGCCAAGTGCTCATCTTTGCAATTGTACGCTGCACCAGTAATCGTACTTGAATGGCCCCTCAACCATTTAATACATCTCTTCCTCTGCAAATCCCATATCCTCACAACCTGACCGCTCCCACCAGAACATATATACCTCGAAACCTTGTTACTGAAGCTAAGCGCCGATATAGAC
820	28906	a28906	7	3.866	Fvb7	17893404	AAxAB	3.86	3	7	-	17;G/A	AATTCTGCAGGACTTCCGTAAGGAATTGAAACAACTGTGTTTGGAGTAAACTTATGATCTTCAACTACAACACTACCTTCCAACAGCTTTGTATACTTTAGACTGTAACCCGTCCTCCTAAAGTGTCCCTGGTTCCCACACACCCATATATCCAGACAGAAACACTCTACATGATCCATGACCCATGTGAAAAATCTTGTCTACCAGGCTTTGCATTTTTGGATCACAGCTTATATTTTT
821	14032	d14032	7	3.945	Fvb7	2558408	ABxAB	3.6	2	4	-	92;A/G_233;G/A	AATTCTGATGATCACGCAAATTTCTTGAAGAAGAAAGGCAAAAACCCTGCTCATTATAGGCCTGATATCCTTCATCAGGTTAGCGGATTTGGACTTTTGTTGCTTTAGCATTTTATATATTCTAAAAATGCTTATATCTATTGTTAGTTAATGAGCAAAAAGTTAGAATGAAGAATTTTAATTGGGTGTACTATGATATATTGAACAAACTAGACTGAAGAAGCTATAGAACAGCTGTCC
822	9648	b9648	7	5.428	Fvb7	2344369	ABxAC	0.69	1	1	-	56;C/A_73;T/C_97;C/G_128;T/G	AATTCATCATGGTTTTTTACACCATAGATAATTGTTTTTTATACCGTATCAATAATAAATTTTCTTGGTAGGTCAAAACACTGATTGCCTGCTCAAAGAGAGAACATGTACATTAGAATGAGGTAGATGTGTTATTATACCTACAATAACTACTTATATCTTACATGTTAATTAGTCCACTCTTCCTCACCTTATCATCCAAAGGTTCTCTCCTTTCTTCTTCTTAGTGTTACATATATA
823	12429	c12429	7	6.551	Fvb7	4242527	AAxAB	8.08	3	10	*	19;T/C	AATTCGTTCCGCTGACTTTTTCCCATTCCTACAAGTGAGTCCGTCAGTGTTCCTACATTGACTAGGACTAAACTAAACAAGATCATCGCATCTCCAGTTTGCATCTCCAACTCCTAATCTCCCATCTCTCTTCGGAATTTCATCTTCTCAAGGGTTCAAAAATTATGTTTAGAGTTTAGACCACACGTCTTTAAGGCTCCTTTGGTCTTCAGGGTCATCTGCGTCTTCAGGGACTGCCTC
824	4078	d4078	7	9.547	Fvb7	5589752	AAxAB	2.82	1	3	-	85;T/C_126;A/G	AATTCGACCTAAATGCAATTCCATCCCATCACACTACTACAATCTTCCCCAATGGGGACTGACCAATGCACCATCCCATAATCCTTGATGCAGTTGACACCTCATATCAAGAGAGGCTAAGAAACGGCCCTCTCCAATTCCATCCTTCAAGCTCAACCAAAGTCCACCTTGGAGGATCCTCAGCCTATACAGGATATCAAGTGCTTGAAGGATTTGTTCGAGTTTATTAGCTTCAAGCAT
825	13208	a13208	7	9.756	Fvb7	6301763	AAxAB	0.26	1	7	-	44;G/T	AATTCAACATAAGACACCAAAAGCTTAGAGAGCAACTGAAATGGGACACATGGATAATGATCATTCTTCTCGTATAATCAACACTATTCAGATCATATATAGTAAGAAATCAAAATCCGATGGTACCTGGAACAAACCTTGGTCGCTGAAGCGAAGCTCCATAGATGTAAGGACGAGAATTAGAGGCATTGTAATAGTAATTGAGAATCAGATTCCTGAGGAACTTGTAATAGAGCGGCG
826	29485	a29485	7	10.409	Fvb7	6912452	AAxAB	0.93	2	3	-	9;C/A	AATTCTGATCGATACATCGCCGTCACTACTTTAGGAACGTACCCAACTAGAATTAGTCAAGCCCAATCACCCTTAGTCCAAAGTCGTCTCTTGAACCACCATATAGATGCTAATTATCGACCTTGATCAAGAGTTATAAATCACCTTGACCCGACCCATTCAAGCTAGCCAAACATGACGCAACCTAAACACCTCTCTGTCATAGCCACAAACTCGATTCTGATCCTTCACTCCCAACAT
827	17595	d17595	7	11.819	Fvb7	9718032	ABxAC	37.85	3	37	***	67;A/G_129;C/T	AATTCTAGATTGTTATGCAGGTACCTTTAAATGTGACATCGACTTTTTGAACGTCATCCTAGTTGACACTTGCTTCATTATTGAACTCTTTTTGAGTAATTCTGAACAAGAACATCATAATGCAAATTACTATATAATGAGATCACCGTGGCTGAGGAAATCTGTGGAGAGGGACCTAATACTGTTTGAAAATCAGCTTCCTTATTTTCTTCTTCAAGAGCTATATGACTTCGCCACACC
828	32955	a32955	7	14.142	Fvb2	10749519	AAxAB	3.13	1	4	-	131;C/T	AATTCAGAGCATAATTGACAGAAGAAAAGGGTGAAGAACAAGAGATTGAATAAGAAAAAGAGCAAAAATTAGAGGAAGCAAGCTTGCCCATCATGATTGAATATATAGCTGTGGTTAAAGCTATTATATGGCCTCGTTTGGTTCGTGGAAAGTAACCATCAGTAAACGAAAGTTGTTCATTTCATGTATTTGGGAATGCTGAAGGAAAGGAAATACTTTCCTGGAGGTTGGGAAAATGTG
829	29703	a29703	7	14.171	Fvb7	16028826	AAxAB	0.22	1	30	-	8;C/T	AATTCCTTCTCTCTTTCTTGCGTTTTGCCTCCCTCAGTAAATAGACCAAACAAGCAGGGTGTTGCACATGGGGCTGTGAATATTCAAGCTTGTCTGCAAGTCTGCAAATCTCATTTTAAAACAATGTAACCCAACACCCAAAAAGCATAACACCTTTTTCCAAGTACCTTCTTCCCTAAAACCCTGTAAGGATGATGAAGAAAACAAAACTAACAGAGATATAAAACTAAATGAAGAACA
830	4266	a4266	7	14.189	Fvb7	16478541	AAxAB	1.27	1	50	-	204;T/C	AATTCTAGGAGAACCAGCAGAGCCAGGTCGTTCTAGTCCATGTGTGTTTTGAACAGCTGGAACTTCAAACTGTTTAACCTGATGCCTCTCAGGGGTAAAAGTCCGACAACTGAAACATACCAAAATCCCAATAAGATTAGCACCTCAAGATACAATTCAGATAAACATGACATGAAATAATGTACTGAAATTCTAGTCAACAGCTTAATGTTCTCAACAATTATCATGATGCAAAAGTCT
831	1429	b1429	7	14.234	Fvb7	9294420	AAxAB	3.56	1	9	-	42;T/C	AATTCATATAAATGCAAAAATGTGCCATTTAATGGGTTTTAATAAATTCAATTATTGGGACTTCCTAACAAGACAAAAGCATCCAATTAAATAAAAAAACCACATTTTGGTGTAATACATGATATGGTAACTGATATGGCAGTAAATATTTGATGATGTTAAAATCCCAATGACTTGACAATATTTAACTGACAGGCTCAACAACAAGAGCACACCATGATGTAAGAACATGGATACGAA
832	12891	a12891	7	14.378	Fvb7	8908850	ABxAB	27.25	1	34	***	56;A/G_122;T/A_171;C/T	AATTCTCTACTGGACATCTTGGCTGGTGGTGGTGATGACACTCCCACTATGGCTTGAAAAGCGATTCTAGATAACAGCTGATCAATTTCTCTATTTGCTGTAGGAGCAATGGAGCATGTGATTTAGTTTCATATGAATTATTATGTATTTTTTTTGTTTCCTCCAATATTACACCAATGAATACTGATAACATATTTGACACATGAAACTGTTTGAAAGTTTTGCATTTGTTTTCCTGAA
833	22186	c22186	7	14.551	Fvb7	8925217	AAxAB	2.49	1	0	-	227;T/C	AATTCACATGGGAGGATCAAAGGAGAGACCATAAAAATGGTAGGTGAAATCCAACATAATATAGCACAATCTACATAGTGGCTCAAATATGTATGAATTTTCCATAATGGGCCACTCAGCCAATTTGACCATCCTACAGTCCCTCCCCCCAGCACCATTCTTTCCTCCACCTTTTAAAAGCATCAAAATCTGAGGCACTTCCCTCACTCCTCTTCTTCCCTTCATCATTCTCTCTCTAAC
834	66	b66	7	15.49	Fvb7	8796501	AAxAB	0.49	1	15	-	155;C/T_221;A/G	AATTCGTTCCTCTTCTTTGCTAGCTGAAGCACAAGATTCTTCTGGTTCAGCTTCCATAGGATCAACGGTTGCGTTAGATAACATCATTAAGCAGTTGGCGAGATCTTCTTCCTCACTTGACGGGCAATGTGAGTTACCAAACGTACCCACTTTCGCCCTCAAGGATCTCTTTCTTTTAGACCACCCGCTGCATCCTCTCCTGTCGTCTTCGTAATCAGGTGACGATACCAGAGACTCCGC
835	37414	a37414	7	16.124	Fvb7	16650971	AAxAB	1.99	1	0	-	121;G/A_122;A/T	AATTCAACAATATATGCAGCTTATAGCCATCATAACAGATCCCAAATTTGATTCTGAATAACGTGATAGATATTTTAGATATATTCCAAATAAGTTCTTGCCTTCTGGCTTTCCAAGAAGAGATGCGGCTTTGGATGCATGCATGCACAAACTGTGTGTACAATTCAAAGCTATGATAAGCTCTCAATCAAACCAACAATATTGGTTGTTTTAAACATGCCTAATTTCATCACCTGTAAA
836	19481	b19481	7	16.178	Fvb3	14159056	AAxAB	23.58	1	39	***	56;C/G_93;C/T_167;G/A_178;A/G	AATTCAACTTGATGTGAACAAATTTTGTGGCATTTATGCTGAAGTTGAAAGGAAAACAGCAAGTGGTACAACTGAACAAGATAGGGTAATCCACATTACTAATATGATATATTTCAAGTTACGTATTATATATAGAATAACTGACTCTATATTTTGTTTTTATGTTTGTGCAGATGCTAGAAGCCAAACAAAAGTTTAGGAAATTGCTAAAAAGAAACTTTGCATATGAGCATTGTTGGA
837	10030	b10030	7	22.034	NA	NA	AAxAB	4.76	1	3	*	9;T/A	AATTCCAATTCCACAACTCTACAATACTAAAAATCGAATCAACAACTAACCCCATAGCTTCATAGAACTCAAAGTCTCTAACCCAATCTTACTCATCCAATTCTACGACTTAATCAATTTCAGATACATATATAATCATATACTCATGCTCTTCTGTCTTCATATGATTTGAAATTGGTCAAAGAACACTGAACCCGAAATGAACAGAAAACTAAAAAACATCAATTCCTCCAATCTTAA
838	14749	b14749	7	0	Fvb7	11799350	AAxAB	1.41	1	43	-	171;G/A	AATTCCTTGTATAGCTGGTGCATTGATGAAAACAATGTATGATTCCTATAAGTCCCTGGGAGAATAGTTGGTTGTTGTCTACGGACGTATCCGTTTTAACCGTTAGTTACAACAATGCATTGCTGCTCATGCAATAGTATTTGATAATGCATTTCAGAGTGTTGCCAACTTGTGGGTTTTTCTTGGAAGCCGAGACAACAATAGACCTTAATGGTCAAATCAATGGGTGCAAGCCCAATA
839	12868	b12868	7	1.841	Fvb7	12293193	AAxAB	7	1	33	**	70;C/T_87;A/G_144;A/G_163;A/G	AATTCGAGTTTTCACTCGAAGTCAAAGCACATTGATGTGAGGTATCACTGGATACGTGATGTGCTAGAAGCCAAGCAACTACAGCTTAAGAAGATTCACACAGATGACAACAGTTCAGATATGATGACTAAGTCATTATCGAAGAAGAAGTTTGAGTTTTGCAAAAGTGCATCAGGAATGGCGCAGCCCTCCAACTAAGTCGGGAGGGGGAGATTGATGGGTCAGTCCCTCCTTAATTGG
840	3739	b3739	7	2.381	Fvb7	11592820	AAxAB	29.95	1	44	***	11;T/C	AATTCATTGAATCTATGCCTTCCATCATTGATTGTTCTTGTGAGACGTCTAAGAATGTAGGAGAGCTATGCTGAGTTCTGACAAATTGTCCTAATCTAAGTTACTGTGGTTTACAGTTCTTGGATACTGGGCATGAGTTGGGAAACAACTACAATGAAGTCATTGCACCTCAAGATATTGCAACATATGGTGGGCTTTGTGCACTTGCAAGTTTTGACCGAGCAGAGCTGAAGGCATGTA
841	20073	a20073	7	2.428	Fvb7	17848410	AAxAB	2.28	1	3	-	39;T/C	AATTCTTCATAGATTTCACTCCAACTTTTCATCCTGTTATACTCAATATCTTTTCTGTTTTCGATAGTACATACATATTCATTCCTCTTAACAGTTCAGAGCTATGCACCAAACGGCATCATATTAGACAAATCAATTTAAATTTCAGATCATATACAAAAAGGCAACATCAGACTCACAGATCAGGGTTGGCATCAATTTTGCTGAAGAAATCTCCAGTGTGGGGAAACAAAGAACTTA
842	21424	b21424	7	4.331	Fvb7	14377442	AAxAB	1.78	1	1	-	168;A/C	AATTCTCAGTCATGGTGATGAAGATCTCAATGCAGCTAAAGTTTCGCTTGGAGTTCTAGGAGTAATTTCACAGGTGTAACTCTTTTCTAGCTTCTGCTTAGTACTCTTAGATTAAAAATCACTACAATGTTAAATTAAAGCTCACTCCCTTTGAAGGTCACGTTGAGTCTGCAACCAATGTTTAAGCGATCCATCACATATTTGAGCGAGGGCGACTCCGACTTGGGAGATCAAGTGCTC
843	15407	a15407	7	6.717	Fvb7	18449663	AAxAB	5.54	1	23	*	111;A/G_209;G/A	AATTCTACTCTTGAACCCAAGTTCGACTTCCTTGATCTGTAATTTGCGTGAAACACCTGTAAATAGTGACTAATCTAACATACAACTCTAGAATTTAGAGTTTCAATATTCAAGAGCATTATAGAAGACTCAAGTTCAACTCTTCATTCATCTGAAAAAAGTGGTAAAGGGTTAAAATTTCAGAGTATGTTGTGGCAGGAGCAAGAAATGTGGAAGGAAAAAGACTAGTGTGGTGGTTGT
844	15444	a15444	7	7.591	Fvb7	18930216	AAxAB	0.26	1	7	-	39;A/C_84;A/G	AATTCTGATATGTGACAAAAGTTGTAGTACCGTTAATATATATCTTACTGTCATGAGACAGTCATTACATGTTTTGTTATTATCAGTTCTGTCATTCAGTATACCGCTTTGTTAGCGTAAGAGCAGTCAGGTAACACAAGCATGATTATGTGCGGATTAAATTTATGTATCTATGACGTTCTTAACATTTTTATGCTAGTGAAAATTGTCAACTAGTTTTGTAAGTTCGATATCTGATAA
845	33825	a33825	7	9.86	Fvb7	19755655	AAxAB	0.04	1	55	-	21;T/C	AATTCACACGTCTCATCGAGTTAGCGACTATCTGCAATGCAGAAGCAGCTATACTTCCTATCATGTAACTATCAAACTCAACAGATAAATAGTAACAGAAAACCTAACCATTGTATTAATAATTACACATTGCATTTCTCCTTATTTCTAATTAGTCCCTATCATCATCTCACATTACCATCTCGCATTGCAGTAATTCATTTAGTAATAACAACAAACCGACACATTCATATCCTTACA
846	14343	b14343	7	11.76	Fvb7	15726500	AAxAB	1.8	1	3	-	78;T/C_237;C/G	AATTCATAAAATAGCACATATCACTTTCTCTTACGATTCAAAAACTATATCTAATCCATCATTTCTTTGGAATTTTCATACTTATGGAGAGTTAGTTAAATTTGCAAATTACATAAATGATATCTATCAGGAATGGATGTGTGTCGTCGTCACATTGGGTTAAAGTTTTAACTATATCTATCGAGAATGGATGTGTGTTATCACATTGGATTAAAGTTTTCGATATTTATATAACTTCTC
847	23521	b23521	7	16.426	Fvb7	22793872	ABxAB	0.6	2	20	-	184;C/T	AATTCGTATCCCATACATCAACCTGCTTAATAACAACTTCCATCAGGTCCATAGGAACAATTGCAGAGCTAATATGATCATAAGCATGATGACAATTAGAGCCAAACTTACATCTTCTACGTATCCCTTGCTGACTTCGAGTTCTACAAACAACTGAAGTCCTGTCATTGGTTGTTGCAAGAGGCGCCTGGTCCATCAACAAATTTTGGACTTCTCCTCTTAGCCATTTGCTCCCTCCTG
848	26981	d26981	7	17.895	Fvb7	20840943	ABxAC	3.93	3	33	-	11;T/C_12;C/T_27;A/G_230;T/C	AATTCTCTATTTTCATGAATCGAACAAAAAAGCTTATTATGCCGAAATATATCACTTAAGTGATAGATACTTTGTAACATGTCACATTAATCTCTTTGCTCTTCATCTAATCATATTATCCTAGATGCTATGCAACATGGAGATTCTGAACTACTTTAGTTTCCATAGAATAGTATCTTCCAAGAATTTCATTTGGTAAAAAAAGAGCCACCATGATAATTGGGAAAAAGTTTTTCAGCT
849	7654	c7654	7	21.294	Fvb7	20747494	AAxAB	0.85	1	27	-	74;C/T_158;A/T	AATTCGGTAGTAACTTTTTACTGCCTTAGTTAACATACCATCACTTGCGGCTCCAAAGTCAGGTCCATTTGTACCGTACAAAACGTCAACGAGATCCTTAGCATACCTGTTTGAGAACATATTAACATGTTAGCAGTGCCCTGATATGGTAAAAAGTTATCAACCTATCATCATCAATACCATTAAACTCTTACGTAAGATTAGGATCTGGATGACCGTGCCCAAAATCCTCTAGAGGCA
850	34911	b34911	7	24.254	Fvb7	21273850	AAxAB	2.98	1	59	-	31;A/G	AATTCCTCACGGAAAAGCTGGTTACTTTATTACTGGTTTCATCACAATTTGATTCTATCTGCAGGTCTAGCCGAGGACCAACTGCCGATGGAGATCTTGGTGTCTGTATAAGTGCTCCTGGTGCAGCTGTTGCTCCTGTTCCTACATGGACTCTCCAACGACGGATGCTCATGAATGGAACATCAATGGCATCCCCATCTGCTTGTGGTGGAATTGCACTACTCATAAGTGCATTGAAGG
851	10729	a10729	7	24.716	Fvb6	11181367	AAxAB	13.46	1	32	***	156;C/T	AATTCATCAACTGATCCGCTTGCAAATTGATCAGATTTGCTCTTGTTGAAGGAAAAATTGAATATAGACACAGTATGACTACTTTATCATGAATAAAGAATTGGGCTCTCCCTATTTATGTTTTCTACCATATCATTCTGTAATGATGCTTGAGATCAAGGTTATCATATCAGACAACCATAAACATAAGAAGATAGGATGCAAATGGCATGGGCATATATAACAGAAGAGAACAAATCG
852	14579	a14579	7	29.702	Fvb7	22419826	AAxAB	1.02	1	47	-	113;A/G_229;T/C	AATTCTGTACAGAATGCTTTACCCCAAATTAGAGGAGACTTCCGACATTCATATTACAGCACAGATTAGTCTATAAAACGTATAAAAAGAATGAAGAGAGTAGTGAAGACTAAAACTGGGCTATTATTTTTACAAAAGTCAAAAATGATTTTGCATATATAAAATCTAGTGTTTAGCAATTGATTGCTATCCATCTACTCGTCTTTCAGAAAATGAATACTCTCAGGGCTATCATCTTCT
853	20668	a20668	7	30.44	Fvb7	22411855	AAxAB	0.01	1	6	-	97;G/A	AATTCCACTGCTGGTGTGGGACTTATCAGTCCACCTCCCCATCATGATATCTACTCAATTGAAGACCTTGCTCAACTAATTCATGATCTTAAGGTATGTTTATTGTTTATGTTGCCATTAACTGTTTTGGCTCTCCTCTTCACTCCATTCCCTTCTTTTGATTGTTGTTAATATTTCTTTTGCTGCTTATTGAGCACGTCCATGTTTCTTTTAAACTCAATTTTGTTCCATTTATGCAGA
854	8082	a8082	7	31.875	Fvb7	22918771	AAxAB	6.34	1	30	*	16;T/G	AATTCAAGATGGCAGATCGTGCAAATGGTAAAATGTGTCCACATGAGAGAGAAGAAAGATGTTGAGAATATCCCGTTGCAACTAGGAGTCAATTGTATTGCCTCTGGGTGATGATGTAGGTTTATTAATATAGATGTAGTGGTTTGATATAATATAACAGTCTCCCCTGTACTGTAAAGAGCATGAAATTACCACACCCTTCCCCTCATGTAAGCTCACTATATGACTATTTCAATAAAG
855	5880	b5880	7	0	NA	NA	AAxAB	1.55	1	36	-	34;T/A	AATTCACCTGCATAATAGCTCATATCCAAATTTCTAACATATAGTAGCAGAATAGAAATAAGAATCAATGCATTAGAGTTTCACCTTCGTCCTATTATTCATATCTCTGCAATCAAAGTTAGCGGAAGCAAATCGGAAACATAGCCAGAAACCCCAAAAACACGATTTGATCTATTTTGGTAATCGAAAGCCTATTTGGGATGATTAATCCCATATGCGAACTACAAGTATCTGTAAACT
856	37959	a37959	7	1.142	Fvb3	17596760	AAxAB	3.75	1	68	-	102;C/T_137;T/C_192;A/G	AATTCAAGGCCGATTACCATGCCATAGTCATCCATCTTGACTACGGTGAAGTCAACTTTCCCCTTCCAAGCACCGATGTGAACCTCCACATCGCGTGCTACCCCAATAATGGGCGTGGTAGGTATATTCACCGTCTTTATGCTGCCTAACTCCTTCGTGACTCGAAGGCCAAGCTTCCTTGCTTCTTCGGACATCATGAAGTTATGCGTTGCTCCGTAATCCACCAAGGCACGAACCATC
857	2693	b2693	7	1.183	Fvb4	8577246	AAxAB	3.57	1	44	-	20;A/T_83;A/C_113;C/T_129;A/G	AATTCATTACTCCAAGAAAAAATTAAATTTCCAATATGCCTTTGAAAATTAAATAAACTCTAGTGCATGCATGACATTCAAATAAAAGGTCCACTCACAGTACTCGGCTATGCCTGCCGACGACCCGAGACTTCCTCCAAATGATCCTCCTCACGGCCTGAACAATAATTAATATTAATTCTCATACAACATTAAAACTTCAATAAATAACCCAAAAATTTAAGGGCTTAAAATTAATCT
858	16825	b16825	7	1.912	Fvb7	1518145	AAxAB	20.32	1	54	***	6;T/A_14;C/G	AATTCCACGAGTAAGTAAGTGATACCAACTAATCAAGCCAAAATATGGGAATCAGCCTTACTTGCTCGCTGGATCATCTGAGTGGGAGTAACAATGCGCGGTTCAGGCACCAATTCAGCTTCAACACCTTTCGAAAGAGAAATTATGATCGGCATTGTCTTCCTATCTCTCCAATACCTACTAATTTCCTCAAACACAACACTCGTCTCAGTTGATGGCAACCCATTCACCACAATGTCA
859	15125	b15125	7	1.946	Fvb7	1128180	AAxAB	2.52	1	2	-	124;A/G	AATTCCGCACCCTTGTGCAATTCAAGGAGACTGACGGACGAAGCCCTAGAGGTAGGGTTCACCGTCACCAAAAGAAGAAAATAGAGAAATATCTTACACTCTTTTTCTTTAGTATAGAGAATTTGAAGTCTTGTTTTGTTTTCCTAAACAAGTTCCGAAATCAATTATCAATTTTGAGGAATGGAATTTACAAAATTCGTTTCCCTAAGATTAACTACCATGATCGATGTGCATATATGT
860	18945	c18945	7	2.735	NA	NA	ABxAB	0.12	2	2	-	109;C/T_236;A/G	AATTCAGATACCTATTTTTTAGATGAAATCATCTCCATTATATTCAAAAACACATGTTATTTCCATGCAATAGTACTTGGTAACACCTTTTAAACTAAAACTATATAAACAAGATAGTTAAATTTAGTTAGTTATATACGAAGGCATGGAGGCTGGAATTAATATGCAATTGGAAACAACATTTTCACACTTCAAAAACTCTTAAGCTAATCTCATAATTGAATTGCAATTTAGTTAATC
861	11514	d11514	7	2.887	Fvb7	2126245	ABxAC	37.85	3	42	***	44;T/C_146;A/T	AATTCTTCGTTGGTTGATATGTATTGCAAATGTGGGTCCTTGGATATGGCTCTCCAAGTGTTCGAGAGAATGCCTAAACGTGATGTGATTACATGGAATTATATGATTCTGGGATTTGCCATGCATGGAAAAGCTGAGGCAGCTTTAAAGTGTTTCGATCGTATGGTTAATATGGAGAGTTGCAAGCCAAATTCCATCACATTCGTTGGTGTTTTGAGTGCATGCAATCACAGAGGCATG
862	38588	b38588	7	3.094	Fvb7	4816315	AAxAB	2.86	1	5	-	78;T/A	AATTCCCTGGTCAATTACTGACCAGTAGAACACAACTTTGGAGGGCAGATTGACCTTTTGGGATTGTTAATGACAACATCCTAAGACATGGAAATCCATATAAGATTTATAAAAACTCACTTCATATTCTAAAAACTGAATCTATTGTAATATCTTCATCCAAGAACCAACAATATAAAGAACAGCAGAACGCCAACATGCTTGCCATGCTCCCAAGGCAAATAACTCTGATATTTTTAA
863	6215	d6215	7	5.297	Fvb7	6947002	AAxAB	3.64	1	35	-	7;C/A_72;T/C	AATTCATCAAAAATTAACTTGACTAAATATTGTACTAAAAATATAAGCTCGTGGATTTCTGCCAATCATGGATATGCACAGTGACTAGGTTACACGAAAAACTGAAGAAAACAGAAACTATGGTGGAGCTTATCTAGTGATTGTGCATGGAAAAGTTTGTTAATGTAATCAACTGTGATCATGGACAACTAGCTTATTGTAAGCCAAGCTAAGAAAGGTTATACACAGTTGTGGCATTCT
864	20733	a20733	7	5.502	Fvb7	811074	ABxAC	8.02	3	10	*	187;A/G	AATTCATTCAATATTAATCAGGTACATTTTTTGCATAACTGCATTCAATATTAATATCAGATTTCACTTTGCATTTACCCTAGTGGAAGCTGTCTGGATTCATAACATAAAAAGCAGTCCAGAAAATGCACCTGATTAATATTGAATGCAGTTATGCAGCGAAACCTTTTCAGTCATGAGTTCCGCAAACTAGCAGTATTATACAGCAACAAACTTTGGAGTTCAATATTGAGTTTGTCT
865	35844	b35844	7	6.156	Fvb7	8338691	AAxAB	2.89	1	33	-	158;T/G	AATTCAGATCATTTGATTCAGCTACTCTCTGAACCAAAGAAGATAGGAATGTGACGGTCTTGTTCATCACAATTGGGTTCTCTAGCTCTGCCATTGAGATGATGGCAAGTTTTGTCTTGGTGCTTCAACCTGTAGGGGGTTTTGTTGGAAACAAGTGTTTGAATATTGCAAGTGCTAGGCTAGCTACAAGGCTGGTGTATGGTTATATATAAGGTAGTTATCAGTAACTTTTTCAATTTT
866	39079	b39079	7	13.037	Fvb7	12237773	AAxAB	0.79	1	19	-	71;C/A_137;T/A	AATTCCAGGTCTTTCGGTCGATATCTAAACGTACTGTATACCGTTTATCTTTTGTTAGAGAAGAGTTAACTCTTGTTTCCCCCTCTTTTATCATGGTTCTCACTGCAACCACAAGACTTTCCTAAGACACTTACAATTGGAAGGAGGGGTGTGCTTTGAATTTAAACTTCAATCATCAATACTGGGGTAATGCTAGAGAAAAGTACCATCATTGGGATCAAATAAGAGTAATGGCATAAC
867	38484	b38484	7	13.804	Fvb7	12309578	AAxAB	0.57	1	2	-	148;G/A	AATTCAATTCATTTTTCTTTTGTTGGCTCAACTAGGACAGTTTTCAGGAGAAACTTTTGTACTTGTATCTTGAACAAATAAATTATCACAGTAATTTGTTGTCATGAGCTAAATTTTGCTCGGTTATCACAAGCTTGTATGAGATCACAGTTATTTCTACTCGCTTTCAAAGGAATAAGGAATATATGTCATTTATCTTTGCAATTTTGGCTCTCAACAATTACCGCTTGTGAGCTTTAG
868	5887	a5887	7	21.112	Fvb7	13513307	ABxAB	2.28	2	37	-	48;A/G	AATTCCAGTGCTGTTTTTTGTGTTCTAGCTAACTCTTTGAAATGAATTATGGTTTGACTGTAGAACCAAAAAACGAAAACAAATAGCAAGAGGAACATATCTCCCACACAAATCATAAAAACACAGCTCTATATAAAAACAAATCCAGAATATGCAAGGGACAAAGACAGTACAGAATCATACTATGCATAACAAAACTTAGCCCAGAATGTGAAGGAGGTACCTCAAAACTTCGCTGGC
869	4665	c4665	7	23.598	Fvb7	14455803	AAxAB	0.03	1	15	-	90;C/T	AATTCAACTGCAACCCCACCAACACGGGTGTATTGCTCTTTTATTTCGGTGTGCACAGAACTACTTTGTCTGTTCAAGTCATCAACCTGACCCATTTTTCCAATTTGGTTGCAGAATGCTACTGATATATAAGAAAAAACTTCCTCTACATATGACAAAAGCAATTCAACCAAGTAAGGCATTATGGCCTCCTGCACAGCATCCAGAGTCCTAGGAAGGTCAACGACACCATGAGCTTGG
870	18825	b18825	7	25.958	Fvb7	14396949	AAxAB	0.08	1	26	-	105;A/T	AATTCATCCAGCAAATCATACCATGCCACCCAACAGGACTACTACACCAACGAAATCGACCTGTGGAGTACTTTTGCTGCTGCAAAACTGCAATCACCATCACCTATGTCATCCTCCGACGAATTATACCACGTGTCGAATACTCATATATAACAGAATGACCCATTATACAATAATAAATATTATCTATCTATTATTACCCCTTGAATCCAAAGTCAGAAGAGTATAATTACAGCGCAC
871	3493	b3493	7	26.078	Fvb7	16650971	AAxAB	3.86	1	61	*	34;G/A	AATTCAACAATATATGCAGTTTATAGCCATCATAGCAGATCCCAAATTTGATTCTGAATAACGTGATAGATATTTTAGATATATTCCAAATAAGTTCTTGCCTTCTGGCTTTCCAAGAAGAATTGCGGCTTTGGATGCATGCATGCACAAACTGTGTGTACAATTCAAAGCTATGATAAGCTCTCAATGAAACCAACAATTGGTTAATTGTTTTAAACATGCCTAATTTCATCACCTGTA
872	5279	b5279	7	26.858	Fvb7	17528890	AAxAB	1.61	1	23	-	225;C/A	AATTCACCACAGACTATAAACCACTCACCTCCACAAAGATCTTCACCTGGGCAAGTTCCAACCACCAATCCGACCAATCAATCTATATCTACAATTTTCACAATTTCTGGAAGAATGTGCAAATCGATCTGCGAGAATCACAACCCATAACAATTTACTCTGTTTTTTTGTTTTTGGTTTTTTACAAATTGATTTGATTTGAAGAAGAAAGCTGAAAAAGAAAGGCAAACCCCAGAGAGA
873	6875	b6875	7	29.223	Fvb7	17848410	AAxAB	0.57	1	2	-	34;T/A	AATTCTTCATAGATTTCACTCCAACTTTTCATCCTGTTATACTCAATATCTTTTCTGTTTTTGATAGGACATACATATTCATTCCTCCTAACAGTTCAGAGCTATACACCAGACGGCATCATATTTGACAAATCAATTTAAATTTCAGATCATATACAAAAAGGCAACATCAGAACTCACAGATCAGGGTTGGCATCAATTTTGCTGAAGAAATCTCCAGTGTGGGGAAACAAAGAACTT
874	37877	b37877	7	31.246	Fvb7	6335870	AAxAB	0.44	1	1	-	15;A/C_16;A/G_77;A/C	AATTCTGTATTAAGACGGTTTGTATTTAGCTAGTATGTACACGGTATCCAAAATTTCACTCATACTTTTACCGTGTACGCACGGTCTCGCATGTCGCCCGTGCCATCCAGAATCGATTAATAGGATCGACTGAAATAGATCTTCTGATTCCTTTTCTTCTCTCCAAAATCTAGGGTTTCTCTGCGTGGACAAAAGCAGAACGAATCTGTTGCTTCATATCAGCCGTCGGAGCAAAATCCA
875	3943	a3943	7	33.464	Fvb6	33444248	AAxAB	0.35	1	4	-	98;T/C_102;A/G_235;T/A	AATTCGGGGACAACTAAAGACTCAGAACTAGGATAGCAAGCATAGCTGCTATCCTCTGTGAAAAACACATGATACGCATATGCATGATTTACCTGAGATCATAAGAGAGAGTTAGTGACCTCATAACTTGTTCTTCTTGGCAAAGAGCAATAACTTCAGATGTTTTTTGAGATAGAAGGATTGTCAACTATCCTTATACCTTCAATGTTTAAACTAGATTGTGTTATTATCCAGATTCTT
876	13509	a13509	7	35.27	Fvb7	14099069	AAxAB	1.85	1	39	-	45;T/C	AATTCTCGCCCACTCCACAACGGGATCGATTATGGATATATTGATTCAATTAGTCTATTGTAAATAATCAATATACACGTAGCTTATATGATTCTAGTTTACACTAGGGTTAATTAAAGTGGGTGGATAGGTTGATTTTGAGCTCAAATTTTAAGCATCATCGTAAAACTTGGAGTTTTACGGACAATATGTTGCAAATGAGTGAGTCAGAGTGACTAATTTCATCCCAATTCCCAAACC
877	35155	b35155	7	38.518	Fvb7	19054563	AAxAB	0.35	1	6	-	32;A/G_159;G/A_170;G/A	AATTCTTGTATGAAGAAAGCAGAGAACTACACAAACAAACAAAGTTCAAAGCTATGGATTATAATGCCAACCTTAGTAGCCCACTAAATTACATGAAGGTATAAATAGGATCAAATTTGCAATACTCAACTGAAGTGTGACAAAATGTGTGAAATTGTTGCATAATTTTCGTGGAGTAAACTGTAAAAGACTTGCTTGCATAGTGCGCAAATAGTTCGCTTACATAGTTTTCTCCAAGCT
878	30568	b30568	7	43.057	Fvb7	19855952	AAxAB	9.66	1	39	***	99;G/A_181;T/G	AATTCAGCACATGTAACCGTTTTTGTATGATAGCTAGTGTGACCCCAATGCGGCAAAAGCATGATATATATATTCTACAGGGTTTGGATTCGAAGCTTCACAAAATATTAAACGTAATTGACAAATGGTAACAATGTCCCCAACAAATTAACATGGCTGAAATCATAATGTTCCGAGTATAGTATGTGATACACGTGTAGGTCGCAATCCTTGAATCAAGCTCCAAATATACTTCTCGAT
879	10932	b10932	7	55.914	Fvb7	23361834	AAxAB	0.38	1	49	-	119;T/A	AATTCCATTCGGAGGCTGCCACAACTGTGGAACAACATATGCAGTAGCCTGGAAGAAAAATATCACAAGGTAGGGAATCCATAAGAAACATAAACTAAATAACAGGTAGCGATTCACTTTAGGACGAACAGGAAAGAAGCCAGACCTTCCCTGACGGATTATTCCTGTCATTACGTGGCCATTTCCAAAGCTTGTGAACAGCATTGGAGGCGAGGGCTAACAGAGCCAAACCATTGTTGG
880	2258	b2258	7	55.952	Fvb7	22817625	AAxAB	4.65	1	41	*	209;C/T	AATTCCAAAATCAAATTTCAGATTTTTCATCTCGCACAAGGACTTTTCATATATAAATATTGGATTATTAGGGGAATATTGTTTGATCGTTGATTGTTCCCATTTTTAGTTTGGTAAATATAAATGCTTTTCTTCTGTGTAAAGTCAATAAGGTTGAAAATCGTACGGGAATGTGGTTGCCATTGGAGAATATGTGCTGAAATCATATGTTCTCAAATTCGGATTCAAATCTGTCAACTA
881	12377	b12377	7	56.189	Fvb7	23025460	AAxAB	4.2	1	40	*	207;G/A	AATTCCGACAATCGGAAAACCAATTATCTAAGGTGTTGAATGGTTGATATTGTATACGTATCAACCAATCATCTATACGTATCCCAAATGGTTGATACATTGTGAATCGATTCGCTTCCTTTAGCTTGCTTTTGTAGTGCAGTTCTTAAGCGGAAAGCTTTGCGTTTCATTCACTCTGGGATATGATTCTGGGGCTGGAACGCACTCAAACGCAGTTTTCATCTCTATTTGGGATAGCAC
882	29008	a29008	7	0	Fvb7	4800239	AAxAB	12.49	1	63	***	140;T/A	AATTCAACATCAGCTGGCAAAGTTGCTGTTATTAACTTGAAGGTATGCCACGTCTTTCTATGAAGGTGGAGAAGTGGTTTTTATTTTCCTGTTCTGCATCTGAGATTTCTGTATTTAGACTTAAGGATATATTAAAATCTTTCTACATGATACCCATATCATCATGTGAAATGCATCTTCAGTTTGGAAGTGATTTTTCGTCATCCATAACATAGTATATATCTGTCAAGTTTCTGCAAA
883	7879	a7879	7	6.711	Fvb7	2344358	AAxAB	6.19	1	44	*	137;G/T	AATTCTTTCAGATTTCATCATGGTTTTTTTACACCATAGATAATATAGTAGGTATCAATAATCAATTTTCTAGGTAGGTCAAAACACTGATTGCCTGCTCAAAGAGAGAACATGTACATTAGAATGAGGTAGATGTGGTATTATACCTACAATAACTACTTATATCTTACATGTTAATTAGTCCACTCTTCCTCACCTTATCATCCAAAGGTTCTCCTTTCTTCTTCTTAGTGTTACATA
884	33027	b33027	7	11.051	Fvb6	29901716	AAxAB	11.52	1	72	***	58;C/T	AATTCTCTTCCATGTGATAGACGTGCATAAAGAATGCATGCATATATTTGCCTATATATAAAGGCATTTGCAATGGTACAAAATATAGAAGTACTAGTGAGTTCATCTTGTGTTATACAAGAGTGTGAGATAGAGAGAAAACTCCAAGTCGAGAGTTTGTGTGTGTAGCAAACAAAGTGTGAGTGAGAGTGTATCTCTTCAAGAGTGAGTCTTGAAGTAGTGTTTCTCTCCGTGTAACCA
885	32588	b32588	7	11.942	Fvb7	18499217	AAxAB	8.67	1	48	***	192;C/T	AATTCAAAGAATAGAAAGTCGTACAAGGCTACGACGCTAGCGTCTAACGCTCACGTCGCCTCATACTGAAATTGTACCTCAGTATGAGGGAAAATCACGTATAGCTAGCTAGCATTTAATCATATACATATTATTCTCATAATCCACTATATATGAGTATGATCACCGAAATTCTCAATTTCAGGAAATTTCCAACAACAGGAAAATTATTCAACAAAAAGCCTATCGCCCAAAAATCTT
886	15791	b15791	7	13.943	Fvb7	4543485	AAxAB	5.73	1	68	*	23;C/T_189;A/T_201;C/T	AATTCTATCAGATTTAACACACGCTCGCTAAGGTTGAAACGTGAACTTTGATGTATGGTCAGGATCTGAGTTTCTCTCTGATGGATGTGTGGAATGAATTGATCACATGTACATATCTTATTTTCTGTTTTTAGGAACACAGAACAAACCTTCAAACCTCCCCCCTTTTGTTACCTTGTACCATATACAAATTTGTAAATGCATGTTTGTAAATACTTATAGTTACTGACTTTTTAGTGT
887	14584	a14584	7	14.558	Fvb6	36576576	AAxAB	0.18	1	4	-	98;A/G	AATTCATCACACTTAATTAAATTAAGTAGCCTAAAATACATTTTCTAATACAAGTGCACTTGCCAAAACAAAACAAAAACATCTCTAACAGGTTTCCCATAACCTTATTTTCTCAATTTTGGGGAATATGGTGATGATCCATTATTTGTTATGATTTTATACCTTTATATCTTGGATTGTATTGTACTTTCAAGTAATTTAGTTCAATTTTACTTAGTTTAGTGTTTTATAGGTTCAAAG
888	8510	a8510	7	15.141	Fvb7	8683710	AAxAB	0.96	1	41	-	90;G/T	AATTCAAATGATACTGAGTTCAAAGCTGTGAGTACTTAATGGAATCACAAACGAGTTGAAAGAAATTATTTTTATTTCACCTGTGTATTTGGGTTTTCACTTTAAGTGATTATCTTGTCATGCTGTAATTTTAGGCTTCAAGAGCTTTTGGCGAGAGACATGAGCCTCAAGATAACTCCGAGGTATGTTGATTCTATTTAAATTGTGTGGTGTATGGGTTGCTGAATTTGAGGGAGTTAG
889	39010	c39010	7	20.634	Fvb7	10704917	ABxAB	2.36	2	42	-	114;C/A	AATTCTAGCCGAAGCTAGCTCCACTCCTGTGCCTTCCTTTATTAGCTCCAGGTGCTCAATTTTGGACTCAATTTCTGATTCAATTGCTTACTGTTTGAAGTTGCTATGTTTGATCTTGAAGCAAATTGTGGCTAGTCTGATTTTGGGGTATGTAGAAGTATAAAGGTTAATGATTTATGTTGTTACAAAATACTTGTTAAGTCAAAAAGGCGAAACTTTGTGTGTAATTGGGGGTAATGC
890	22520	b22520	7	27.824	Fvb7	12794896	AAxAB	1.02	1	47	-	26;T/A	AATTCATATGATCTTGGTGCTTATTCATTTTACTTCATTTTTCAGACTCTCAAATCAAATTAAAGAAAGAAGAATTAGGAAAGAAGATGCTTCGCCATTGTGCAGGTTTACCACTAGCGATTATTGTGCTTGCAGGACTGTTATCTAAGAAAGACACGGTCAATGAGTGGGAAACTGTGAGTGAGAATGTCAATGTGTATATAAGAAGAGGCACAGATCTTGATCGAGAATACAAAGGTC
891	21455	d21455	7	28.497	Fvb7	13211584	ABxAC	13.02	3	23	***	16;T/G_29;A/T	AATTCAGGAGTTCTAGTTAGAAGAAACTAATTTTATTGGTATTTCTGAGCAGCCAAATAGGATTAGAGTGGGAGCTGAACTTGATCTTGATCTTGATGATTTTTGTTTTATGGTTGAATGTAAGATTTGGTAGATTGAATTGGTTGGTAAAGATTTGATTGGTACAACTCTGAACTCAATTACCAGAAAAGGAGAAGATTTTGTTTAGGAAGGTAACTAGAGGTAATCAAAGCATATTAG
892	28898	a28898	7	30.805	Fvb7	13156968	AAxAB	6.37	1	62	*	96;A/G_187;T/A	AATTCGAACTCGTATTCAGTATTCCTAATTGGGGGTGCCTTTCTTTTGCGGCCACCAAACTTCCTGTAAAACCCTAATTTGTATATCTGTCACATAAGGTAGGAATGAAAAATGTTTGATATCATGTGGGAAAATTTGCAGAAAGATACATAGGCGAAAAACCAAATATTACGTTTTTGTGACTCCTTGTTTAGTCATCCGATTTGGATCTATGATCGGTATACTGCTTGCGACGAGGAG
893	6364	b6364	7	33.33	Fvb7	16092269	AAxAB	0.53	1	52	-	114;C/A	AATTCACCTTGCATTGAGTCATCAAATCCACTTCCTTAGCAGCTGAATCCATTCCAGCTCCAAAAACCCAAAACAAACCTGAATACCAACAACCCACAAACTCAATCAAAAACCCAAAACCCAATAAGGATCAAAAAACCCAGAAGGGATTAAAGAACCTGCATGGGGTGGAATGCATACCCAATACGACAAGTCGGAGAATTGAGAGGTGGGTTTCACTGTGGCGCCATCATCAGTGAC
894	18905	a18905	7	35.403	Fvb7	18633044	AAxAB	0.12	1	15	-	43;G/A_109;C/A	AATTCTAAGTAATTTTGATTTCCATTTAACATCTGCAAATGACGTTATGAAATGATGTGCCATTGTTTATCATTTTTTAGAGAAAAATGGAGAAGAGAATAATATGTCACTTCACACATTTTGTGGAACTAGGACAAAGAAGACAATAGTGCTTCTCATCCCAAGTACCCACTTGCTGAATGCTCGTCGTTTTCTCCATCCAACACACCCCGAAAGTGCTCAACACGCGTTACCAATCAT
895	10802	c10802	7	38.531	Fvb7	18381894	AAxAB	3.33	1	25	-	139;A/G_198;C/A	AATTCCAACCATATCACAAGTTAAAACGACACACTAACTATCTCTAATCGTACAATCATCTCTATCTCTTCGGTTTCGAATTAGATAAGTAGCCATTTCTACACATTCACTTTACTTACGAGCACAAATCACATGATTCAAACACTTTCTCTGATCATTTTAATCTAATACAGGTAAATTTACTAACCTAAGTACAGGCATTGCTAAAATTTACTACAATTTCAGAAGCGAAACTTGAAA
896	266	b266	7	39.076	Fvb7	17470522	ABxAB	1.73	2	27	-	175;T/C	AATTCAAAGCTTTCCAGACTCAAAGGTAAATCCAATTCACCTCCACCACATCTTCGCTTCTCTTCACACTCTTCAATACACTCTTCCGATTTCCAACGGTGAAACCCTAATTTCTAACCAGGCCTCGTTCGATTCCCGAGAATCACAGCTTTGATTTTCTTGCGATCTTTCTTCTTCTTCTTACGATTCGATCTTTTATGAATCTTTTGATGGAAATTTGTTCTTCTTTTGTAACAGTGT
897	12974	b12974	7	43.259	Fvb7	18782134	AAxAB	5.57	1	50	*	84;T/G	AATTCCACATAAGCTTCCTCCTGCAATGGTTGAAATCCAATAAGCACCTAGCATATGCTGAAAACAACCAAATGTAAAAAGAGTGAAAACAGAGCTGTATAAAGTGTTATAACTAACCTTTGGCAACAGGAAAACAATTGCACTTCCTTGTCTACCCATACGTGCAGTTCTGCCAACTCTATGTACGAAAACATTAGGATCTTGAGGTGTATCATACTGCAAACGAAGAAACAGGTAAGT
898	7133	a7133	7	50.605	Fvb7	20067518	AAxAB	0.18	1	4	-	123;T/A	AATTCAAGTTCATATGTTGATTTTCTATCTCCACATATTAAACGTGATATTGTAAGTTAAAGAAGCGGCACTCGTCTTGAGTTTTTAAGATTCTAAAGCGAACCGAAAACTTGTGAGCTTGATTACTCGTTGCAACAGAGTTTTAGGAGGCCACTTACTTGACCTATTCTCAGAGCTAGCTTGCTGTGGAAGTGAATGTTGTGTAGAGCACCCAAGATGTGCCTATAATAGACTTTTTGA
899	11726	a11726	7	50.778	Fvb7	19765290	AAxAB	0.17	1	2	-	181;T/C	AATTCTAACCAATTGAAGACGATATAGTGAGACAGATTCAACTTTGTTAGCAAAAATCATGAAATTGAATAATTGGCGATCAAATTGAAAAAGCTTATTAAGGCTGACCTTCCCATTATTCCGTGGACCATGACGACGAGATGGTCGGCAGAGGAAGAATCGGACTCCTTAGCACTCCAGATATCGCGGCTACCATTGACCGACTCCGACGAGCACACTCCGTTCTCTTTGACGACGACG
900	20936	a20936	7	51.627	Fvb4	20867748	AAxAB	0.62	1	41	-	68;A/G_135;G/A	AATTCTCCTACTGCATCTCAAACGCCAATTCCTAGGCCTAAGAGAAGAAATATCGTAAGAAAAGCAAGACAAAAGGGCAAAGAAGCGGAAGTCAAAGCTATTGGAGAAGAAATGGTAGCCAGAATGTGAGAAACGGCGGCACAAATGAAAGTGGCGGAAGAGGAAAGGAAGAGAAGAGACAAGAAAATGAAGGATCGAAGAGAGGTTGCTAGGTTAGAGAATATCTTAATGATGCAAACT
901	10279	a10279	7	54.259	Fvb7	23129249	AAxAB	1.35	1	20	-	36;A/T	AATTCTGCATAAGGTGTTTCAAATGTCTATAAAACCAGCGATTAAATTTTCATTGCAAGAAAAGTAAGAGCTGTCGGTAGCAGAAAATGCTCACCCACTAATGTGTGCTTATGAATGCAGTGATCCTTTTCATTTACATCAACGATGACATTTACATGTACCAACTATTCCTGCAGGTCACCTCTTGATGTCGCCTAACTTCAGTTTCATCTTCATGTTACCAGCTTGAACCAATATTTC
902	4140	a4140	7	54.719	Fvb7	23486539	AAxAB	0.11	1	3	-	197;G/A	AATTCCGTAGCTTAGGTTCCGACATGTACAGTCATCTCGGTTCAGGTTACGCTTTGTTCAACGTTAAGCGGTTTGCTTTTGGAGCATATCAAATCACGATAAGGTACGTAATAAGCATCTTGGTGCATGCTACTATATGCTAGCTACTTACATTGTTCGATCGAATTGAAAGACAAAGTATTCTCAATTTACTTTATGTATTTAGGTATCCAGAAGATCCTTATGATCGGAAATGGTATT
